# Supplementary material for: Unique neural coding of crucial versus irrelevant plant odors in a hawkmoth
Source: eLife. 2022 May 27;11:e77429. doi: 10.7554/eLife.77429 (PMC9142141; doi:10.7554/eLife.77429)
Supplement: Figure 1—source data 1. — XCMS analysis of 69 headspaces. [file elife-77429-fig1-data1.xlsx]

## Sheet: original xcms (1997 features)
featureidx	name	mzmed	mzmin	mzmax	rtmed	rtmin	rtmax	npeaks	Prosopis	Control	Poaceae	Mirabilis	Quercus	Senna	Gutierrezia	Mimosa	Vitis	Argemone	Chilopsis	Datura foliage	Amaranthus	Proboscidea	Baccharis	tassel_3	Helianthus	Datura flower	Agave	CV	pvalue	qvalue	Prosopis.mean	Control.mean	Poaceae.mean	Mirabilis.mean	Quercus.mean	Senna.mean	Gutierrezia.mean	Mimosa.mean	Vitis.mean	Argemone.mean	Chilopsis.mean	Datura foliage.mean	Amaranthus.mean	Proboscidea.mean	Baccharis.mean	tassel_3.mean	Helianthus.mean	Datura flower.mean	Agave.mean
1	M86T12	86.1	86	86.1	11.7176	11.5891	12.1475	9	0	0	0	0	0	0	0	0	0	0	0	0	0	0	0	0	0	3	5		3.25989e-08	1.2144e-06	0	0	0	0	0	0	0	0	0	0	0	0	0	0	0	0	0	116195	594741
2	M101T25	101.1	101.1	101.1	24.7777	24.7177	24.7926	8	0	0	0	1	0	0	0	1	1	0	3	0	0	0	2	0	0	0	0		2.05629e-07	2.0716e-06	148639	221432	162181	211938	165865	178327	172838	188439	244115	148274	212859	142310	141279	151840	248938	170881	141528	140835	116839
3	M40T7_2	40.1	40	40.1	6.93158	6.6315	6.9474	7	0	0	0	0	0	0	0	0	0	0	0	0	0	0	0	0	5	1	0		2.76794e-07	2.14493e-06	0	0	0	0	0	76.8443	0	0	115.336	0	0	0	0	0	0	0	83879.2	30109.2	1545.22
4	M212T20	212.2	212.2	212.2	19.6972	19.69	19.7011	14	0	0	3	0	0	0	0	0	0	0	0	4	0	0	0	0	5	2	0		3.35362e-07	2.18395e-06	7078.15	661.034	69886.6	768.164	15900.1	538.07	616.284	798.061	1248.43	12551.8	1309.18	126700	20046.7	32592.4	962.388	3747.98	248774	79246.3	513.208
5	M155T20	155.1	155.1	155.1	19.7006	19.6937	19.7288	18	0	0	3	0	1	0	0	0	0	0	0	4	0	2	0	0	5	3	0		3.44046e-07	2.1887e-06	6656.7	1156.21	49704.5	1893.93	14582	1186.98	1588.46	1816.49	1732.27	9748.52	2740.04	88527.9	14211.6	23827.6	2173.23	4922.36	171487	56349.6	1784.81
6	M212T19	212.2	212.2	212.2	19.0708	18.9152	19.0868	17	1	0	0	0	2	0	0	0	0	0	0	4	0	2	0	0	4	2	0		3.70757e-07	2.20202e-06	2225.82	108.382	15175	105.198	5188.24	137.804	149.005	151.393	273.258	3223.45	502.985	27697.4	4785	8186.27	185.5	935.993	52784.8	16477	108.22
7	M147T25_1	147.1	147.1	147.1	24.7872	24.7177	24.8062	24	1	2	0	4	1	0	0	2	4	0	5	0	0	0	3	1	1	0	0		4.29772e-07	2.22598e-06	87606.2	166429	83052.1	190480	97588.1	89627.9	89160.2	157317	184110	77323.2	243967	72825.9	68011.5	80496.5	278361	93504.8	92856.6	70703.8	59973.7
8	M89T24	89.1	89.1	89.1	24.3145	24.3084	24.3172	3	0	0	0	0	0	0	0	0	0	0	0	0	0	0	0	0	0	3	0		5.33254e-07	2.25591e-06	665558	812457	696041	776734	713428	740985	732865	759210	782794	656246	802523	604647	584121	681395	776805	718936	615234	755794	460198
9	M213T19	213.2	213.1	213.2	19.0682	18.9206	19.0747	5	0	0	1	0	0	0	0	0	0	0	0	1	0	0	0	0	3	0	0		6.24714e-07	2.27451e-06	179.078	11.3789	1913.23	33.0075	607.196	10.4151	25.6911	55.6458	30.8144	217.33	93.5099	4058.22	422.337	1017.67	15.7872	113.41	8633.21	2413.33	30.7973
10	M129T31	129.1	129.1	129.1	30.7267	30.4531	31.0462	7	0	0	0	0	0	0	0	0	0	0	0	0	0	0	0	0	0	0	4		6.53748e-07	2.27938e-06	64060.3	90055.5	67569.1	88145.7	72910.7	75192.3	74371.3	74906.5	89404.4	63526.2	85965.5	56875.8	58148.8	65285.4	81403.5	74107.7	62623.3	61627.1	113919
11	M87T31	87.1	87.1	87.1	30.8618	30.3794	31.2434	20	0	0	0	0	0	0	0	0	0	0	0	0	0	0	0	0	0	0	5		6.73985e-07	2.28253e-06	1.50496e+06	2.03032e+06	1.5618e+06	2.04492e+06	1.71713e+06	1.8737e+06	1.8055e+06	1.85083e+06	1.98224e+06	1.52751e+06	1.99849e+06	1.38808e+06	1.50423e+06	1.42767e+06	2.02915e+06	1.78229e+06	1.23675e+06	1.52519e+06	1.11018e+06
12	M91T31	91.1	91.1	91.1	30.8057	30.4493	31.0687	10	0	0	0	0	0	0	0	0	0	0	0	0	0	0	0	0	0	0	5		7.76072e-07	2.31323e-06	37179.1	50420.4	36222.8	49653.2	42094.6	43184.4	40951.8	46006.8	49164.1	38368.7	47302	32573.1	32007.9	37696.5	47324.6	43258.2	34403.6	34031.8	76821.1
13	M70T25	70.1	70.1	70.1	24.7834	24.7177	25.26	21	0	2	0	4	0	0	0	2	4	0	5	0	0	0	3	0	0	0	1		9.71307e-07	2.35526e-06	43039.7	133725	35317.1	164047	46125.6	53129	41735.9	127763	152396	34355.6	215222	25534.1	30928.9	34049.4	260509	43126.5	32273.9	28215.9	38099.1
14	M182T20_2	182.1	182.1	182.1	19.682	19.6737	19.6867	7	0	0	1	0	0	0	0	0	0	0	0	3	0	0	0	0	3	0	0		1.02096e-06	2.36356e-06	367.124	202.75	2968.41	290.052	685.961	165	196.602	336.661	221.147	546.463	774.052	4890.84	530.611	1110.15	268.385	426.937	9626.21	2888.5	201.572
15	M89T23	89.1	89.1	89.1	23.0894	23.0786	23.0969	3	0	0	0	0	0	0	0	0	0	0	0	0	0	0	0	0	0	3	0		1.17357e-06	2.38495e-06	341060	403438	353435	389566	362839	372567	366243	388280	403334	336672	397022	303875	295553	337043	401954	366239	311129	421880	241426
16	M181T20_1	181.1	181.1	181.1	19.685	19.6776	19.686	9	0	0	2	0	0	0	0	0	0	0	0	3	0	0	0	0	3	1	0		1.21317e-06	2.38967e-06	648.473	264.107	3671.31	344.012	1163.91	180.74	321.612	498.054	403.956	1132.5	3080.5	7870.26	846.073	1527.14	273.885	514.15	15601.1	4749.68	231.411
17	M154T20	154.1	154.1	154.1	19.6973	19.6934	19.6974	3	0	0	0	0	0	0	0	0	0	0	0	0	0	0	0	0	3	0	0		1.27706e-06	2.3967e-06	1262.82	431.637	7646.34	774.068	2482.56	511.354	748.395	832.608	593.828	1659.55	914.458	15633.4	1687.73	3104.8	916.369	1089.48	31814.3	8788.26	902.877
18	M148T25	148.1	148.1	148.1	24.7796	24.7185	24.7973	11	0	1	0	2	0	0	0	1	1	0	3	0	0	0	3	0	0	0	0		1.28799e-06	2.39784e-06	9187.4	14167.8	8827.65	17662.1	9556.17	7703.05	9514.56	15516.3	15127	8391.04	22688.1	6532.53	6511.48	8250.51	22179.4	9289.48	17300.8	6921.5	6099.04
19	M169T20	169.1	169.1	169.1	19.6989	19.6948	19.7125	10	0	0	3	0	0	0	0	0	0	0	0	3	0	0	0	0	3	1	0		1.4257e-06	2.41076e-06	2129.96	755.901	12240	1104.9	3879.91	739.133	898.88	1043.42	848.616	1973.76	1386.28	22884	3153.97	5264.54	981.243	1697.13	44497.6	14348.3	1109.1
20	M217T25	217.1	217.1	217.2	25.3744	25.2981	25.9751	9	0	1	0	0	0	0	0	1	1	0	3	0	0	0	1	0	1	0	0		1.47179e-06	2.41456e-06	5182.68	15554.8	6582.79	17219.6	5986.37	6519.43	5791.94	12911.2	12198.2	5758.39	13505	4907.22	4238.44	6583.16	17434.1	6036.74	16527	4358.82	3957.78
21	M159T16_1	159.1	159.1	159.1	15.7775	15.5643	15.7891	14	0	0	0	2	2	0	0	1	3	0	3	0	0	0	1	0	1	0	1		1.487e-06	2.41577e-06	859.666	321.167	589.448	7019.11	2713.92	322.328	1159.43	11926.6	11179	703.01	40235.6	899.071	464.696	621.907	10731.7	1015.64	7456.1	443.763	4118.48
22	M260T25_1	260.2	260.2	260.2	25.3648	25.2943	25.3859	16	0	2	0	4	0	0	0	1	2	0	4	0	0	0	3	0	0	0	0		1.53333e-06	2.41931e-06	395.137	14881.6	2094.57	18780.4	903.747	1396.24	865.207	8830.46	9242.5	417.55	12496.7	482.337	276.663	1117.66	17007.2	1035.89	2180.83	331.234	279.765
23	M71T25_1	71.1	71.1	71.1	24.7834	24.5408	24.8062	21	0	2	0	4	0	0	0	2	4	0	5	0	0	0	3	0	0	0	1		1.65555e-06	2.42773e-06	97301.5	201629	97168.3	225924	113726	112755	104721	186935	219217	83523.3	269766	80688.5	79432.3	101180	320731	110942	83182.6	80160.3	67399.7
24	M204T12_2	204.2	204.2	204.2	11.7595	11.3298	11.7819	17	0	0	0	4	0	0	0	1	0	0	0	1	0	0	0	1	5	0	0		1.72872e-06	2.43223e-06	3.63733	0	5.35698	18644.1	1709.79	3.50703	75.0336	3660.53	3171.22	0	61.2286	4126.01	283.971	0	147.75	2172.61	23807.3	1275.89	646.168
25	M55T7	55.1	55.1	55.1	7.42704	6.9241	7.6222	42	0	1	2	1	0	2	3	1	4	1	0	0	2	3	2	0	5	3	5		1.81171e-06	2.43691e-06	8233.54	46606.7	35929.5	21465.5	7088.07	54171.7	55905.7	15058.1	74081	38017.7	16593.7	8813.2	97793.7	200146	73670	11776	412918	121503	298996
26	M153T20	153.1	153.1	153.1	19.6945	19.6927	19.6973	5	0	0	1	0	0	0	0	0	0	0	0	2	0	0	0	0	1	1	0		1.88098e-06	2.44051e-06	2274.53	932.916	17391.1	1248.87	5012.04	566.352	1185.8	2076.42	1039.5	2975.26	2098.86	33747.2	3943.43	7118.9	1602.82	2298.98	65833.7	20491.7	1304.64
27	M43T28	43	43	43	27.9117	27.7496	28.1004	12	1	0	1	0	0	0	0	0	0	0	0	1	0	0	0	0	3	0	0		1.97745e-06	2.44512e-06	528030	572871	547278	520333	445667	478991	494527	499037	529438	440198	545382	397326	386634	468951	518468	497998	392967	394790	331361
28	M113T25	113.1	113.1	113.1	24.7872	24.7177	25.3248	22	1	2	0	4	0	0	0	2	4	0	4	0	0	0	3	0	0	0	2		2.09049e-06	2.45e-06	31220	69781.3	24956.2	86813.3	26117	30386.9	26903.6	65309.1	80699.8	18685.3	97195.9	14923.4	19068.5	22211.6	134426	27986.9	20330	18953.1	37994.1
29	M155T19	155.1	155.1	155.1	19.0681	18.4157	19.0814	38	0	0	4	0	0	0	0	0	0	0	0	4	2	2	2	0	5	4	0		2.09627e-06	2.45023e-06	2783.4	565.59	14405.6	784.484	5018.05	443.248	769.212	564.698	771.235	3331.5	1237.34	26203.5	5419.13	7690.13	18514.8	1497.18	49439.2	16078.7	556.644
30	M51T14_2	51	51	51	13.8233	13.5816	13.9776	21	0	0	0	0	0	0	0	0	0	0	5	0	0	0	2	0	4	0	3		2.10418e-06	2.45055e-06	12421.4	17077.4	13380.3	77489.9	24264.3	15004.7	14694.9	16139.7	16979.9	12302.5	87372.8	11979.5	11436.2	10648.2	204787	16585	24134.3	22303.5	117519
31	M186T25	186.1	186.1	186.1	25.3572	25.2752	25.3859	30	0	3	2	4	0	0	1	2	4	0	5	0	0	1	3	1	3	1	0		2.30103e-06	2.45785e-06	3712.11	27589.1	7005.2	31976.9	4055.68	4966.7	4474.53	17925.9	18500.4	2364.17	21686.7	3651.61	2321.66	5320.45	28362.1	4108.03	6472.38	2931.51	2119.48
32	M312T30	312.2	312.2	312.2	29.8428	29.7856	29.923	7	0	0	1	0	2	0	0	0	0	0	1	0	0	2	1	0	0	0	0		2.48172e-06	2.46356e-06	1583	309.673	1523.32	1051.32	2733.03	2152.49	2565.66	2021.33	530.977	1610.76	2519.26	227.217	497.303	1800.03	2746.16	2620.86	740.017	238.942	284.236
33	M63T12	63	63	63.1	12.0313	11.6184	12.3604	14	0	0	0	1	0	0	0	0	0	0	3	0	0	1	2	0	1	1	3		2.62107e-06	2.46744e-06	700.702	209.58	226.004	1705.15	276.009	293.746	531.255	1386.9	254.609	699.892	24173.6	173.713	256.418	329.614	16317	369.298	1754.06	11094.7	331309
34	M329T25	329.2	329.2	329.2	25.3629	25.3477	25.382	8	0	1	0	2	0	0	0	1	0	0	2	0	0	0	2	0	0	0	0		2.73206e-06	2.47025e-06	59.4781	8473.78	294.468	10444.4	113.924	514.36	337.188	5669.05	4641.25	22.3419	4876.57	36.9482	4.19393	74.0042	9924.65	128.792	58.6244	13.2677	31.6178
35	M139T25	139	139	139.1	25.3667	25.2943	25.6265	18	0	2	1	4	0	0	0	2	3	0	3	0	0	0	2	0	1	0	0		2.76664e-06	2.47108e-06	2007.1	20383	5909.38	23056.5	3795.7	4152.6	3537.44	14771.7	14163.8	2513.85	14941.7	2550.13	2412.67	3275.36	21301.9	3369.13	9016.07	2158.11	1423.56
36	M241T25	241.2	241.2	241.2	24.7834	24.7177	24.8062	21	0	2	0	4	0	1	0	2	4	0	5	0	0	0	3	0	0	0	0		2.81688e-06	2.47225e-06	411.886	23253.3	885.389	33745.2	526.518	1938.01	674.819	24965.4	31005.8	229.527	50818.9	314.255	249.491	540.618	65256	577.669	13307.4	190.987	281.985
37	M119T14	119.1	119	119.1	13.8902	13.5043	13.9891	41	1	0	0	4	2	0	0	1	2	0	5	1	0	1	3	0	5	2	5		2.83037e-06	2.47256e-06	2231.68	674.168	2330.41	784874	3826.5	766.147	1509.06	5597.83	7266.95	772.623	527505	5465.13	1735.91	1198.52	291650	945.255	86326.2	11741.3	41532
38	M204T15	204.2	204.2	204.2	14.6754	14.1639	15.6939	59	2	0	0	3	1	0	0	3	3	0	3	4	0	0	3	0	5	3	3		2.84495e-06	2.47289e-06	13841.9	9.71563	348.953	200293	7352.77	14.6622	151.376	27398.4	29428.7	10.5472	6083.03	18917.9	65.7627	54.058	108768	1081.99	181475	35190.1	10323.1
39	M146T25	146.1	146.1	146.1	24.7796	24.7177	24.8025	17	0	0	0	4	0	0	0	2	3	0	5	0	0	0	3	0	0	0	0		3.05229e-06	2.47725e-06	4428.42	12621.8	4142.4	15925.3	4926.33	4961.06	4724.36	12968.9	15658.3	3871.57	22982.8	3835.58	3441.54	3749.31	27526.2	4923.04	8110.18	3762.72	2841.43
40	M111T25_2	111.1	111.1	111.1	24.7796	24.7185	24.7987	9	0	0	0	2	0	0	0	1	0	0	4	0	0	0	2	0	0	0	0		3.23721e-06	2.48067e-06	7201.7	44015.2	5883.76	70440.2	7976.21	7650.06	5985.93	54626.4	49156.2	3105.48	106811	4460	3660.98	5941.28	131863	8403.76	10118.6	5343.33	4494.45
41	M141T20_2	141.1	141.1	141.1	19.6973	19.6934	19.6974	3	0	0	0	0	0	0	0	0	0	0	0	0	0	0	0	0	3	0	0		3.25296e-06	2.48095e-06	2335.58	1220.94	11333.9	1536.36	3521.92	1230.52	1102.79	1245.25	1399.57	2333.25	1981.67	19200.6	3055.22	4788.04	1513.34	2503.63	44856.2	13047.9	2500.72
42	M87T37_2	87.1	87.1	87.1	36.9569	36.708	37.1878	13	0	0	0	0	0	0	0	0	0	0	0	0	0	0	0	0	0	0	5		3.26024e-06	2.48107e-06	1.1691e+06	1.49498e+06	1.38155e+06	1.57952e+06	1.38646e+06	1.42261e+06	1.37304e+06	1.46518e+06	1.63059e+06	1.16294e+06	1.5511e+06	1.09959e+06	1.14274e+06	1.20687e+06	1.53264e+06	1.37344e+06	965254	1.19652e+06	1.05301e+06
43	M129T32	129.1	129.1	129.1	32.283	31.7606	32.4087	21	0	1	1	3	0	0	1	1	0	0	4	0	0	0	2	2	1	1	0		3.33815e-06	2.48239e-06	57240.7	157430	86642.3	128537	90366.8	109766	106242	114153	121995	53576.8	135928	48390.3	50918.5	61426.1	141678	112701	62175.4	72185.9	64347.2
44	M130T25	130.1	130.1	130.1	24.7796	24.7177	24.8025	17	0	2	0	3	0	0	0	2	2	0	5	0	0	0	3	0	0	0	0		3.50139e-06	2.48495e-06	4783.58	25513.1	6108.52	32443.8	6153.8	6797.89	5517.15	27552.6	28449.6	4768.2	49991.9	4310.18	4522.32	5140.41	60077.3	7006.36	5833.43	4605.78	4055.68
45	M94T11	94.1	94	94.1	11.0367	10.7009	11.155	21	3	0	0	0	0	0	0	3	0	0	4	0	0	0	2	1	0	2	5		3.56575e-06	2.4859e-06	18226.9	179.078	242.211	2611.19	621.74	3781.84	808.868	27090.2	3154.99	466.523	18740.4	200.408	1051.26	197.426	22939	8768.24	2045.35	3772.3	294642
46	M204T19	204.2	204.2	204.2	19.1314	19.1025	19.2397	6	0	0	0	0	0	0	0	0	1	0	0	0	0	0	1	0	3	0	0		3.58319e-06	2.48615e-06	147.64	0	79.0971	1907.28	235.156	9.3265	118.128	1274.78	3516.34	112.887	428.771	60.137	52.163	6.55974	4467.79	107.196	24522.3	230.075	12.0193
47	M147T25_2	147.1	147.1	147.1	25.3801	25.2333	25.7976	12	1	1	0	2	0	1	0	1	0	0	1	0	0	0	1	0	1	0	0		3.58623e-06	2.4862e-06	108615	130309	103578	123534	105072	105826	108088	116236	122168	97658.6	122217	90219.5	88318.1	101497	141358	105900	108445	89141.4	82605.8
48	M273T25	273.1	273.1	273.1	25.3629	25.2905	25.3859	20	0	2	3	4	0	0	0	1	3	0	2	1	0	0	2	0	2	0	0		3.66049e-06	2.48724e-06	729.353	10526.7	2503.8	13185	776.883	1069.38	976.267	7037.58	6759.96	502.661	8610.09	825.058	356.108	1502.68	11592.6	1076.79	1710.12	474.089	219.012
49	M75T16_1	75	75	75.1	16.1135	16.0603	16.6396	12	0	0	0	0	1	0	1	0	0	0	2	0	1	0	0	2	1	3	1		3.69958e-06	2.48777e-06	6357.95	5798.86	4945.14	6620.88	7358.55	6847.69	7601.18	12324.1	5773.28	3811	16127.8	5039.97	4749.64	5899.09	9907.84	9284.72	6420.16	269824	10675.4
50	M108T16	108.1	108.1	108.1	16.0713	15.6939	16.3598	34	4	0	0	0	0	1	0	3	0	1	5	1	0	0	3	1	1	4	5		3.76298e-06	2.48861e-06	65055	1831.39	7343.26	2491.71	7539.2	10133	7136.38	438793	2774.53	15740.8	751009	27446.3	17872	4608.65	361103	65915.7	22464.8	2.29181e+07	346638
51	M100T25	100.1	100.1	100.1	24.7796	24.7758	24.7987	5	0	0	0	1	0	0	0	0	0	0	2	0	0	0	2	0	0	0	0		3.78416e-06	2.48889e-06	11806.7	23544.2	10940.6	34966.6	12672.5	13827.7	12506.3	27068.2	29650.2	10611.6	40612.6	7426.76	8144.26	11085.3	50958.2	11723	11393.6	10623.9	8482.14
52	M107T16	107.1	107.1	107.1	16.0683	15.9833	16.5824	48	2	1	1	4	2	1	2	2	0	0	5	2	0	0	2	2	3	4	5		3.83589e-06	2.48954e-06	71864.3	3890.14	9458.46	13963.9	22865.9	11490.3	24876.4	298202	4498.23	16847.4	516539	23831	13791.2	2709.05	242070	54904.8	45122.2	1.55723e+07	258032
53	M259T25_2	259.2	259.2	259.2	24.7853	24.4021	24.8787	22	0	2	0	4	0	0	0	2	4	0	5	0	0	0	3	0	1	0	0		3.91106e-06	2.49047e-06	426.951	13296.2	672.204	18705.2	587.989	1222.44	616.945	14359.9	17528.4	303.725	28301.2	232.597	184.849	479.086	36638.2	542.811	14332.8	306.697	281.439
54	M158T25	158.1	158.1	158.1	25.3667	25.2943	25.8808	21	0	2	1	4	0	0	0	2	4	0	4	0	0	0	3	0	1	0	0		3.96033e-06	2.49106e-06	8831.02	25212.8	11107	28652.5	9613.91	10334.3	10232.9	19675.6	20515.3	8495.11	21254.3	8092.93	7465.41	10153.9	26269.6	10058.8	13198.4	7603.28	8244.12
55	M84T11	84	84	84.1	11.1078	10.8719	11.3131	7	0	0	0	0	0	0	0	0	0	0	0	0	0	0	0	0	1	0	4		3.96117e-06	2.49107e-06	104401	111517	91041.4	116040	101467	96141.3	109773	119812	105227	91059.6	129745	80351.3	86733.8	80668.3	115656	109839	86799.3	95298.5	358538
56	M93T15	93.1	93	93.1	14.819	14.4168	15.534	76	3	0	0	4	2	0	0	3	3	3	5	3	0	0	3	3	5	4	3		4.07548e-06	2.49238e-06	82774.7	502.084	1226.48	701602	18390.3	1018.71	2152.13	25828.4	50290.7	72855.3	281521	48280	1587.36	331.285	209793	92273.6	239950	2.49353e+06	58765.3
57	M51T12	51	51	51.1	12.0484	11.5683	12.6702	40	4	0	0	1	0	1	0	2	0	3	5	0	0	0	3	0	1	4	4		4.07914e-06	2.49242e-06	30100.7	22466.5	19087.2	27114.6	19592.8	23957.5	24559.2	40710	22825.5	28781.1	404206	16608.5	16293.5	19738.8	274565	21957.2	23805.7	155285	364140
58	M136T8	136.1	136.1	136.2	8.29753	8.18192	8.34648	17	1	0	0	1	0	0	1	1	0	0	0	0	0	0	0	1	5	4	1		4.07925e-06	2.49242e-06	41662.3	110.63	601.601	388768	867.768	2145.8	3309.4	75000.1	25553.5	2947.29	117749	22984.2	1246.08	31686.4	177.695	16381	242984	3.11118e+06	25136.1
59	M129T25_1	129	129	129	25.3629	25.2943	25.3782	16	0	1	2	4	0	0	0	1	3	0	3	0	0	0	2	0	0	0	0		4.11836e-06	2.49285e-06	10764.2	106302	29339.1	136896	12517	17220.6	10436.1	76281.9	80020.5	9350.63	87529.6	8982.7	9015.25	18582.1	120670	13521.5	14483.2	9705.05	4120.01
60	M62T16	62	62	62.1	16.0793	15.6827	16.4625	21	1	0	0	0	0	1	0	1	1	0	3	1	1	1	2	1	0	4	2		4.26415e-06	2.49439e-06	2168.62	1948.3	810.545	1874.92	2245.51	1973.88	2728.07	9960.56	1669.66	496.909	17142.3	1631.55	973.422	1127.58	10109.3	3920.07	1847.59	345212	7482.98
61	M145T19	145.1	145	145.1	18.7139	18.0132	19.2323	19	0	0	1	3	0	0	0	2	1	0	0	0	0	0	3	0	0	3	2		4.36709e-06	2.49541e-06	901.96	811.853	1214.1	20160	1228.84	752.172	854.237	8757.09	2841.2	654.752	2986.89	770.328	535.716	702.243	135700	977.602	2128.14	23462	4718.17
62	M94T15	94.1	94.1	94.1	14.7022	14.428	15.2364	49	3	0	0	4	1	0	0	2	0	2	5	3	0	0	3	2	5	4	1		4.47811e-06	2.49647e-06	22664.2	249.064	616.284	397883	6881.97	1324.52	435.525	13361.3	1281.55	8635.94	36579.2	7290.57	342.398	227.224	59030.4	11812.1	50370.6	281131	6349.42
63	M78T16	78.1	78	78.1	16.0758	15.7168	16.4416	19	0	0	0	0	0	0	1	2	0	0	5	0	0	0	2	1	0	4	3		4.60438e-06	2.4976e-06	9903.1	5424.42	2708.18	8233.51	7528.55	6488.24	10065.9	52736.8	5199.78	1407.92	92536.8	3534.27	2372.35	4096.75	44664.5	14790.7	5139.43	2.35989e+06	41317.8
64	M41T7_1	41	41	41.1	6.92301	6.56517	7.21323	18	1	0	0	3	1	1	0	2	0	0	2	0	0	0	1	1	4	2	0		4.72285e-06	2.49862e-06	27788	24100.8	21812.1	64186.8	24005.8	26050.3	43209.5	39310.4	26543	18313	44044.2	19798.9	28878.7	21435.7	34659.4	63093.5	1.44182e+06	538740	137089
65	M79T16	79.1	79	79.1	16.0678	15.2314	16.5747	79	1	2	0	4	0	3	3	3	1	0	5	2	2	1	3	3	5	4	5		4.76296e-06	2.49895e-06	92181.4	48404.2	22877.9	48099.9	56937.6	52183.2	70091.2	485537	35824.1	15584.3	808549	26553.1	32144.8	30581	423736	127827	79426.8	1.94664e+07	354994
66	M43T39_2	43	43	43	39.4347	39.2639	39.9007	17	0	0	0	0	0	0	0	0	0	0	0	3	0	1	0	0	4	0	0		4.8184e-06	2.4994e-06	487157	592585	509921	596912	515573	535275	558489	552388	594260	479091	571253	408814	447680	612212	541530	534599	712201	432846	374293
67	M129T25_2	129.1	129.1	129.1	24.7758	24.3514	24.8062	29	0	2	1	4	0	2	1	3	4	0	5	0	0	0	3	0	0	0	4		4.8697e-06	2.4998e-06	25153.5	309440	33411.5	435916	35500.7	52419	36300.6	327019	394829	24515.6	630159	22987.6	22030.3	25369.4	800651	32061.6	30068.5	24363	34877.5
68	M67T15	67.1	67	67.1	14.7012	14.1983	15.2503	32	0	0	0	4	0	0	0	1	1	1	3	0	0	0	2	0	5	4	2		4.96442e-06	2.50053e-06	11745.2	572.341	836.409	272534	1581.27	841.132	1346.53	12407.6	10568.1	25165.5	24581.7	1422.41	1578	653.353	40316.7	1774.94	164514	224485	144062
69	M102T8	102.1	102.1	102.1	8.28988	8.06115	8.34648	14	0	0	0	3	0	0	0	0	0	0	5	0	0	0	0	0	0	3	2		4.98743e-06	2.50071e-06	2523.12	1710.38	1407.44	22095.2	1285.15	1947.55	2142.15	3067.37	2669.72	1343.28	227259	1157.25	1653.63	3000.24	3622.7	2325.29	3260.28	84148.3	21722.4
70	M87T32	87.1	87.1	87.1	32.0049	31.3599	32.755	36	0	0	0	0	0	0	0	0	0	0	0	0	0	0	0	0	0	0	5		4.9967e-06	2.50078e-06	636527	939944	676231	842232	791155	800058	720733	815048	871983	692780	845958	621737	673708	716429	910503	783847	527696	642536	1.00876e+06
71	M50T12	50	50	50.1	12.0454	11.6222	12.3537	38	3	0	0	1	1	1	1	3	0	3	4	1	1	0	3	0	4	4	4		4.9974e-06	2.50078e-06	7626.28	2907.04	2554.32	3204.61	2662.42	3604.02	4740.59	12687.9	2508.47	7534.38	192670	2807.39	2495.73	2996.07	135708	3724.59	5513.99	72304.7	494231
72	M119T12_1	119.1	119.1	119.1	11.7665	11.3139	11.7819	32	0	0	0	4	2	0	0	2	2	0	0	3	0	0	1	1	5	1	0		5.01187e-06	2.50089e-06	437.518	436.68	398.215	89023.2	10091.4	596.543	687.682	20057.1	16099	470.409	1286.14	20943	2267.78	339.096	8600.42	4383.98	78179.4	9365.63	2772.61
73	M161T14_2	161.2	161.1	161.2	14.4319	14.4146	14.5687	5	0	0	0	0	1	0	0	0	0	0	0	0	0	0	1	0	3	0	0		5.05206e-06	2.50118e-06	279.39	101.458	4240.71	405935	4073.65	228.56	2745.2	93429.3	84642.8	158.375	2785.19	12688.5	122.645	251.064	11309.7	512.452	1.5138e+06	12856.1	9632.36
74	M90T16	90.1	90	90.1	16.0832	16.0641	16.3535	15	1	0	0	1	0	0	0	1	0	0	2	0	0	0	1	0	1	4	4		5.06237e-06	2.50126e-06	9948.28	8339.81	2465.09	8811.55	8399.31	8296.34	11426.5	39030.5	6197.43	3376.59	63625.8	3929.57	3371.67	4790.39	37797	13546.5	7591.25	1.76688e+06	33948.1
75	M157T25_2	157.1	157.1	157.1	24.7719	24.7185	24.7796	5	0	0	0	0	0	0	0	1	0	0	2	0	0	0	2	0	0	0	0		5.08823e-06	2.50145e-06	12637.2	19129	12707.2	20924.1	13484.9	13830.8	13328.3	19945.2	20845.2	10930.5	22527	11029.3	9819.35	11831.8	24715.2	12494.1	16356.1	9625.69	9418.97
76	M108T7_2	108.1	108.1	108.1	6.93613	6.6315	6.9474	9	0	0	0	0	0	0	0	0	0	0	0	0	0	0	0	0	5	3	0		5.10346e-06	2.50156e-06	126.031	250.18	129.599	488.389	176.294	193.21	654.981	309.576	266.351	149.532	380.588	97.0588	255.995	132.021	439.344	596.211	55264.2	17539.3	1154.46
77	M187T25	187.1	187.1	187.1	25.3667	25.3553	25.3782	5	0	1	0	2	0	0	0	0	0	0	1	0	0	0	1	0	0	0	0		5.25482e-06	2.51245e-06	9811.48	14152	10084.1	18421.1	10384.4	10409.4	9987.59	13001.5	13068.3	10105.9	13274.6	8398.37	8408.03	10553.3	14645.9	10332.6	13416.4	8334.36	6286.99
78	M87T29	87.1	87.1	87.1	29.2901	28.8017	29.6012	14	0	0	0	0	0	0	0	0	0	0	0	0	0	0	0	0	0	0	5		5.3027e-06	2.51579e-06	977504	1.46196e+06	1.08261e+06	1.39121e+06	1.14624e+06	1.25471e+06	1.187e+06	1.34122e+06	1.32691e+06	1.05919e+06	1.36088e+06	923351	935086	1.03994e+06	1.26582e+06	1.17656e+06	843238	1.02088e+06	1.3712e+06
79	M74T12	74	74	74	12.0472	12.0314	12.0667	18	2	0	1	0	0	1	0	1	0	0	4	1	1	0	3	0	1	3	0		5.55843e-06	2.53277e-06	4115.15	1498.57	2065.84	1757.5	1551.49	2347.17	2361.05	5531.34	1344.26	3755.44	87272.7	2163.83	1950.07	1918.82	57704.2	2352.51	2656.37	30118.1	6955
80	M119T15	119.1	119	119.1	14.8172	14.1877	15.8299	85	4	0	1	4	1	0	1	3	3	0	5	3	0	1	3	2	5	4	3		5.56207e-06	2.533e-06	39305.9	1327.86	3325.55	586500	7381.91	1140.99	2822.54	44739	45826	799.853	138669	39047.9	1760.75	1508.12	82277.3	45515.8	342529	1.29403e+06	30368.4
81	M133T21	133.1	133.1	133.1	20.7641	20.2772	20.9797	9	0	0	0	3	0	0	0	0	0	0	0	0	0	0	1	0	1	3	0		5.60996e-06	2.53603e-06	37227.8	49945.5	39061	64547.3	40730.5	43617.4	43591.9	44173.6	46229.3	38744.2	47427.8	36596.3	34762.9	39558.6	53265.5	40630.5	47727.2	79100.3	36081.4
82	M185T25	185.1	185.1	185.1	25.3362	24.8863	25.8733	60	2	3	3	4	3	4	4	3	4	0	5	4	1	4	3	2	5	3	2		5.96363e-06	2.55709e-06	12022.4	217114	43516.7	271621	17818.3	25788.7	19055.2	146367	142678	3398.16	181169	17192.4	6180.95	30731.1	239015	17238.6	37789.2	19343.4	6889.96
83	M259T25_1	259.2	259.2	259.2	25.3572	25.2023	25.8695	34	0	3	2	4	0	1	1	3	4	0	5	1	0	2	3	1	1	1	1		6.01065e-06	2.55973e-06	3558.28	99517.3	19606.5	127381	6520.3	10014.8	6413.88	68448.1	65116.7	917.406	83546.8	4740.05	960.91	11842.5	111377	6497.79	17506	4892.28	1240.71
84	M150T28	150	150	150	27.824	27.742	27.845	4	1	0	0	1	0	0	0	0	0	0	0	0	0	0	2	0	0	0	0		6.0296e-06	2.56078e-06	25088.9	4489.2	3160.06	5384.52	2948.54	3106.26	3284	3951.42	3937.73	2169.03	5198.02	1847.88	1737.33	2344.26	5907.5	3230.12	1916.43	1698.06	1412.62
85	M156T24	156	156	156	24.2572	24.1886	24.284	17	0	2	0	4	0	0	0	2	3	0	2	0	0	0	2	1	1	0	0		6.25885e-06	2.57308e-06	1757.09	14523.2	4051.69	17870.5	3667.96	2825.25	2264.96	10831.7	14302.6	1035.33	11170.5	1361.7	987.037	2164.26	12976.2	4794.22	3313.96	1630.65	1081.86
86	M87T34	87.1	87.1	87.1	34.3691	33.8992	34.8261	20	0	0	0	0	0	0	0	0	0	0	0	0	0	0	0	0	0	0	5		6.26695e-06	2.5735e-06	783091	1.11262e+06	928342	1.05973e+06	947858	1.00112e+06	970300	949342	1.10821e+06	837856	1.06633e+06	757879	768238	769598	1.09763e+06	941406	662762	812625	924728
87	M95T14	95.1	95.1	95.1	14.4205	13.6823	15.0908	67	2	0	0	4	2	0	0	2	1	0	5	1	0	0	2	1	5	4	5		6.33198e-06	2.57684e-06	10926.2	722.375	1837.11	39182.7	8994.27	748.007	3354.35	11885.2	9930.21	1281.66	29125.2	5889.17	1640.3	978.205	77099.3	6296.57	117585	63356.9	277254
88	M40T24	40	40	40	24.3136	24.3084	24.3216	3	0	0	0	0	0	0	0	0	0	0	0	0	0	0	0	0	0	3	0		6.49007e-06	2.58471e-06	8770.75	13583.5	9085.97	12373.2	9598.66	10796.9	11060.9	11533.8	13484.4	8567.71	13238.6	8171.11	6924.41	8981.54	12717.8	11465.1	9312.98	19563.8	4174.73
89	M120T18	120.05	120	120.1	17.9822	17.7414	18.0142	8	0	0	0	3	0	0	0	0	0	0	0	0	0	0	0	0	1	4	0		6.5378e-06	2.58702e-06	616.336	402.042	364.824	13214.9	600.987	290.687	699.528	612.72	430.747	425.222	1215.97	481.511	316.613	359.335	802.938	804.806	3413.97	72331.8	513.514
90	M50T14_2	50	50	50	13.7344	13.6227	13.9776	16	0	0	0	2	1	0	0	0	0	0	5	0	0	0	3	0	0	0	1		6.67186e-06	2.59335e-06	1592.59	1244.53	962.41	9615.71	3805.35	1179.63	1400.73	1384.97	1341.88	1350.68	59474.9	819.741	710.552	872.073	163660	1699.07	3272.58	1437.68	30730.6
91	M79T12_2	79.1	79.1	79.1	11.6398	11.5858	11.8938	13	0	0	0	3	0	0	0	0	0	0	0	0	0	0	1	0	0	3	5		6.70821e-06	2.59503e-06	3878.3	533.835	375.289	140674	566.118	622.522	992.837	2755.52	3666.48	426.197	3690.58	433.353	802.688	3137.83	14843.7	2571.84	22104	43586.6	645953
92	M39T24	39	39	39	24.3109	24.3071	24.7757	5	0	0	0	0	0	0	0	0	0	0	0	0	0	0	1	0	0	4	0		6.73222e-06	2.59613e-06	8630.88	11204.7	8878.1	11198.9	9175.15	9052.7	9280.61	9986.66	10760.9	8094.83	11181.4	7487.9	6807.12	8983.1	14389.4	9035.68	10340.7	185773	4713
93	M213T25	213.1	213.1	213.2	25.3629	25.2943	25.6265	22	0	2	1	4	0	1	0	2	3	0	5	0	0	0	3	0	1	0	0		6.83847e-06	2.60092e-06	1901.31	15352.9	3515.38	18437.2	1952.17	2357.75	1865.91	10116.6	9814.35	1164.99	13078.5	1418.89	834.411	2738.7	17116.6	2028.72	6136.06	924.13	796.244
94	M77T12	77.1	77	77.1	12.032	11.5891	12.3615	20	1	0	1	1	0	0	0	0	0	0	2	2	0	0	2	0	2	1	5		6.94368e-06	2.60553e-06	23332.2	2111.39	4348.68	45011.9	3304.83	5819.83	6689.65	39828.9	2931.81	14838.9	1.04849e+06	8746.34	4002.42	5910.33	777482	6191.17	17910	304482	131932
95	M51T10	51	51	51	10.1119	9.98748	10.41	7	0	0	0	1	0	0	0	0	0	0	0	0	0	0	0	0	3	1	1		7.02087e-06	2.60884e-06	24149.5	32265.5	25430	37917.2	27016.5	27892	27733.3	30957.7	28566.9	23333.1	33305.7	20806.2	20851	24873.2	29481.7	25912.6	38181.9	37729.2	41445.1
96	M167T20	167.1	167.1	167.1	19.686	19.6774	19.7969	9	0	0	1	0	0	0	0	0	0	0	0	2	0	0	0	0	3	1	0		7.03209e-06	2.60931e-06	724.409	384.842	4657.09	444.433	1471.17	230.501	305.734	1293.56	433.689	864.549	736.952	8878.68	1181.3	1667.58	412.131	675.787	19328.8	6430.45	313.416
97	M42T12	42.1	42	42.1	11.7381	11.155	12.1391	12	0	0	0	0	0	0	0	1	0	0	0	0	0	0	0	0	2	2	5		7.07696e-06	2.6112e-06	11408.8	11372.7	9354.75	12943	12229.9	9969.25	11683.8	16551.6	10775.3	10538.6	13159.6	9226.23	8480.27	8765.33	12704.2	11735.4	16187.2	31966.1	655818
98	M50T16	50	50	50.1	16.0736	15.2364	16.6597	64	4	1	0	4	2	3	3	2	0	0	5	3	1	2	3	1	5	4	4		7.08935e-06	2.61172e-06	8958.7	5795.84	2653.16	6148.34	6350.51	6353.01	7568.27	35947	4713.2	2007.79	58861.3	5265.13	2147.27	4057.01	29256.1	10805.2	5810.61	1.10208e+06	25358.7
99	M91T14	91.1	91	91.1	13.6962	13.4395	13.9835	36	1	0	1	4	0	0	2	1	0	2	5	0	0	0	3	0	4	0	4		7.11904e-06	2.61295e-06	8940.49	769.495	1957.85	1.34556e+06	4450.75	1077.15	9184.35	9790.87	11686.5	37541.3	412288	11956.7	1604.46	952.262	68469.1	2233.33	110953	3996.87	70666
100	M169T19	169.1	169.1	169.1	18.9273	18.9152	19.083	18	1	0	0	0	0	0	0	0	0	0	0	3	0	0	2	0	4	2	0		7.15253e-06	2.61433e-06	902.459	389.058	2962.44	500.276	1007.33	211.192	440.474	325.381	437.139	827.73	733.716	5242.58	1162.74	1585.74	8307.59	622.918	10951.1	3295.79	393.566
101	M130T13	130.1	130	130.1	12.8192	12.762	13.1158	11	0	0	0	4	0	0	0	0	0	0	0	0	0	0	0	0	5	1	1		7.21435e-06	2.61685e-06	669.013	2631.45	758.805	30698.8	1835.69	1836.12	2177.51	1937.41	1876.07	209.281	2702.52	1002.44	973.481	596.82	2865.91	1652.12	20047.7	1746.37	6407.51
102	M82T7_2	82.1	82.1	82.1	6.93158	6.72182	7.04347	11	0	0	0	0	0	0	0	1	0	0	1	0	0	0	0	0	5	3	0		7.23451e-06	2.61766e-06	561.389	630.538	246.356	1606.04	446.467	697.123	4103.96	4058.92	514.01	160.182	4060.43	342.261	2473.98	301.711	920.487	1917.51	81255.3	29087.5	5967.22
103	M63T16	63	63	63.1	16.0831	15.6798	16.66	61	3	2	2	2	3	2	3	2	3	1	3	4	1	3	2	2	3	4	3		7.23793e-06	2.6178e-06	7921.55	7595.88	3279.44	8182.96	9449.2	7308.21	9817.95	29968.3	6400.88	1706.09	33896.2	5413.46	3825.93	5002.85	17207.6	10231.7	6542.26	827078	25120.5
104	M142T25	142.1	142.1	142.1	24.7834	24.7185	24.7962	7	0	0	0	2	0	0	0	1	1	0	2	0	0	0	1	0	0	0	0		7.5302e-06	2.64599e-06	3002.45	8574.58	2537.1	11663.1	3182.89	3388.26	3182.76	9622.98	10023.6	2853.18	15519.1	2188.08	1994.28	2510.96	19403.5	3215.97	3227.91	2679.25	2141.87
105	M123T12_1	123.1	123.1	123.1	12.1138	11.824	12.1945	17	0	0	0	3	0	0	1	1	3	0	2	0	0	0	0	0	5	1	1		7.53104e-06	2.64607e-06	182.8	135.349	276.681	65951.5	1435.18	159.575	745.483	34047.9	73954	138.43	5128.23	556.485	527.41	199.838	566.036	488.443	59349.4	3734.55	1632.55
106	M94T7_2	94.1	94.1	94.1	6.93235	6.6315	7.04727	18	0	0	0	2	0	0	0	0	0	0	1	0	0	0	0	1	5	4	3		7.73586e-06	2.66489e-06	360.783	240.371	380.649	8087.59	453.967	463.165	4830.03	1885.16	1766.27	263.671	2858.05	400.946	358.215	495.922	706.359	7467.46	560814	223016	22176.7
107	M52T16	52	52	52.1	16.0981	15.6994	16.4593	25	1	1	0	2	1	1	1	0	1	0	1	2	1	0	2	1	1	4	3		7.7452e-06	2.66573e-06	3716.07	2684.66	1230.46	2789.28	2834.76	2794.4	3261.01	17549.8	2026.27	891.557	27797.6	2343.7	1302.85	1492.79	14928.2	5242.73	3067.45	816159	11170.7
108	M128T25	128.1	128.1	128.1	24.7834	24.7185	24.81	17	0	2	0	3	0	0	0	2	2	0	4	0	0	0	3	0	1	0	0		8.14514e-06	2.70037e-06	3821.57	19362.6	3996.05	22805.2	5759.26	5076.63	4512.58	17385.7	22189.8	3101.96	35112.1	3640.2	2729.43	3336.95	42014.9	5264.15	6621.76	3414.7	3677.08
109	M117T7_1	117.1	117.1	117.1	7.44897	7.05432	7.6072	14	0	0	0	0	0	0	0	0	0	0	0	0	0	0	0	0	5	0	5		8.29209e-06	2.71246e-06	10935.7	13999.4	9841.85	12884.2	12621.9	11931.5	14953.7	10408.7	12529.3	11417.4	12038	8398.89	9645.87	10577.7	13563.4	11728.4	78328.4	11871.4	78213.1
110	M136T9_2	136.1	136.1	136.1	8.74722	8.73403	8.77775	12	0	0	0	1	0	0	1	0	0	0	0	0	1	0	0	0	5	4	0		8.32153e-06	2.71485e-06	417.227	184.303	498.405	3537.27	463.545	261.31	6230.07	1302.01	1375.96	386.429	1930.77	503.862	4228.52	446.399	2062.85	2434.24	604561	42319.3	122203
111	M163T25	163.1	163.1	163.1	24.7939	24.7834	24.8788	8	1	0	0	0	1	0	0	0	0	0	4	0	0	0	0	1	1	0	0		8.45287e-06	2.72534e-06	21553.2	20485.7	17401.7	21340.4	26552	17302.6	19363.7	18631	20227.7	17425.3	32460.3	16169.7	14571.7	17094	20262.3	24177.1	22485.4	15769.6	13105.4
112	M80T16	80.1	80	80.1	16.0716	15.6932	16.1675	22	0	0	0	0	0	0	0	2	0	0	5	0	0	0	2	1	1	4	3		8.53564e-06	2.73182e-06	5136.85	1948.41	871.241	2089.24	2415.76	1737.01	3943.78	40632.8	1781.76	1050.65	74012.3	2542.09	1316.03	1484.48	34595.2	9927.07	3603.29	1.97475e+06	33768.5
113	M122T14	122.1	122	122.1	13.9651	13.677	14.1983	20	1	0	0	4	0	0	1	1	1	0	0	1	0	0	1	0	3	3	2		8.58303e-06	2.73549e-06	2629.35	214.131	1161.86	200771	2025.04	359.724	1441.33	6848.28	2918.67	274.689	33133.2	1654.09	1964.77	138.404	22994.6	936.304	13573.3	21480	360599
114	M112T25_1	112.1	112.1	112.1	24.7815	24.6363	25.0847	26	0	2	1	4	0	3	0	2	4	0	5	0	0	0	3	0	0	0	2		8.59349e-06	2.73629e-06	6708.82	87345.7	6977.97	122136	7385.09	12542.9	8467.8	90200.8	110496	3739.15	174105	5604.7	3491.14	6354.63	223588	7761.62	6223.86	4762.77	11064.8
115	M93T8	93.1	93	93.1	8.3132	8.06115	8.7613	70	3	0	2	4	0	3	3	3	4	1	5	2	1	3	0	2	5	4	5		8.66958e-06	2.74211e-06	592742	465.934	8403.2	8.29486e+06	10663.2	35949.8	44984.4	1.02478e+06	388202	52527.8	1.90143e+06	352282	5070.63	537957	1278.04	273868	1.31819e+06	2.89946e+07	139517
116	M39T12	39	39	39.1	11.8317	11.4208	12.3044	55	3	1	2	3	2	1	2	2	2	2	5	0	0	0	3	2	2	4	5		8.9553e-06	2.76328e-06	17929.1	7240.58	8316.15	36984.2	12303	6999.51	13711.5	15635.3	8035.37	11427.3	50170.3	7727.98	8489.64	5178.39	26964.4	15099	24240.3	65661.4	6.4545e+06
117	M67T7_2	67.1	67	67.1	6.93424	6.62785	7.04727	14	0	0	0	0	0	1	0	0	0	0	0	0	0	0	0	0	5	4	2		9.04991e-06	2.77006e-06	838.953	957.338	656.628	7935.82	1145.83	1734.36	4574.73	2492.47	2509.5	574.057	3234.3	711.706	1915.73	985.967	1973.04	7396.09	519747	220352	15505.8
118	M89T8	89.1	89.1	89.1	8.30105	8.06828	8.3503	10	0	0	0	2	0	0	0	0	0	0	3	0	0	0	0	0	0	4	1		9.19876e-06	2.78051e-06	30088.4	35317.5	29670.4	69248.9	29790.8	33905.4	34108.2	38030.9	33659.6	30874.1	75581.5	26422.3	26703.6	32331.5	35317.6	32410	32806.1	162650	66302.6
119	M122T15	122.1	122	122.1	14.8236	14.3595	15.541	45	2	0	0	4	1	0	0	1	2	0	3	1	0	0	3	1	4	4	3		9.28858e-06	2.7867e-06	13753	203.656	216.62	306368	2029.26	118.257	427.653	1558.54	3898.37	211.052	11660.5	1343.6	234.05	116.006	62627.8	3639.99	18686.7	103066	3321.46
120	M87T39	87.1	87.1	87.1	39.1819	38.6273	39.9923	32	0	0	0	0	0	0	0	0	0	0	0	0	0	0	0	0	0	0	5		9.3698e-06	2.79221e-06	1.28446e+06	1.58429e+06	1.30199e+06	1.61668e+06	1.48817e+06	1.35221e+06	1.51145e+06	1.55278e+06	1.56972e+06	1.2231e+06	1.63353e+06	1.19023e+06	1.24426e+06	1.25227e+06	1.61876e+06	1.39004e+06	970003	1.24763e+06	1.27094e+06
121	M93T11	93.1	93.1	93.1	11.0363	10.8251	11.1516	16	3	0	0	0	0	0	0	2	0	0	3	0	0	0	1	0	3	1	3		9.40587e-06	2.79463e-06	13011.1	206.544	387.077	2755.4	360.055	2812.08	975.014	19314.2	2099.64	471.323	14778.2	289.591	2184.75	272.981	16563.4	5945.79	16104.9	8826.38	163720
122	M139T24	139	139	139	24.261	24.1962	24.2764	9	0	1	0	2	0	0	0	2	1	0	2	0	0	0	1	0	0	0	0		9.41445e-06	2.79521e-06	2227.15	11726.1	4486.96	14905.4	3856.49	3393.1	3180.18	9692.99	10269.9	1967.28	10683.9	1997.14	1809.13	2515.91	12192.4	4946.41	3632	3023.99	1216.09
123	M84T6	84	84	84.1	5.87699	5.11303	6.95107	40	0	0	0	0	0	1	1	0	0	0	0	0	1	0	1	0	0	0	4		9.48915e-06	2.80017e-06	113550	155207	127058	152212	126513	163532	180464	140188	144503	116099	155064	115968	121471	121807	190969	139586	90702.5	114604	244781
124	M167T19	167.1	167.1	167.1	19.07	18.9381	19.0749	4	0	0	2	0	0	0	0	0	0	0	0	0	0	0	1	0	1	0	0		9.73556e-06	2.81614e-06	450.867	190.656	2012.02	329.133	494.545	128.285	157.178	134.53	170.156	394.342	421.919	2991.93	500.3	841.135	3658.77	276.113	6340.75	1944.35	216.11
125	M274T25	274.1	274.1	274.1	25.3705	25.3629	25.382	3	0	0	0	2	0	0	0	0	0	0	1	0	0	0	0	0	0	0	0		9.89848e-06	2.82635e-06	492.75	1476.64	706.735	2510.06	646.55	575.788	495.83	1348.45	1206.42	563.578	1397.4	395.594	367.696	490.904	1878.56	654.549	597.341	386.658	352.465
126	M69T7	69.1	69.1	69.1	6.92777	6.90155	7.11615	30	0	0	0	4	0	0	2	2	1	0	4	0	0	0	1	2	5	4	2		9.98797e-06	2.83185e-06	3446.78	2232.93	3108.62	64231	4418.87	6106.02	38598.6	17732.9	12997.7	2150.06	26098.3	4477.72	17175.3	5150.48	13158.6	64735.3	2.95035e+06	1.43271e+06	156286
127	M109T15	109.1	109.1	109.1	14.8149	14.3043	15.2379	54	3	0	0	4	1	0	0	0	1	1	5	2	0	0	3	2	4	4	3		9.99197e-06	2.8321e-06	9391.73	740.782	1110.67	164772	7960.83	525.691	2297.56	2024.74	4054.05	6272.14	23578	6878.1	936.44	509.235	93251.8	7875.17	63694.5	165900	10507
128	M56T25	56.1	56.1	56.1	24.7834	24.7177	25.2635	21	0	2	0	4	0	0	0	2	4	0	5	0	0	0	3	0	0	0	1		1.00067e-05	2.833e-06	13158.6	39113.2	12541.3	51961.6	11691.3	15161.2	13943	41684.4	44538.1	10680.5	63908.5	10845.1	8065.59	11466.9	76260.8	14521.8	10100.6	10185	16683.3
129	M105T15	105.1	105	105.1	14.5666	14.1583	15.0831	72	3	3	0	4	2	3	1	3	3	0	5	2	1	0	3	2	5	4	4		1.00873e-05	2.83787e-06	34653.2	16536.6	8390.1	293954	11420.3	10983.1	12451.7	85740.7	82244.2	2228.71	72596.7	39289	1808.83	1843.17	197515	18762.9	841546	504667	33702.4
130	M43T38	43	43	43	37.9257	37.6931	38.1392	15	0	0	0	0	0	0	0	0	0	0	0	1	0	1	0	0	5	0	0		1.01405e-05	2.84105e-06	509628	635515	545872	578650	525528	562792	558711	562505	607008	500551	579575	398950	449384	498129	565257	516134	699462	458100	381763
131	M65T14_1	65.1	65	65.1	13.8972	13.5912	13.9551	11	0	0	0	4	0	0	0	1	0	0	1	1	0	0	0	0	2	0	1		1.0141e-05	2.84108e-06	580.423	246.681	396.432	301687	554.059	216.598	341.651	2478.77	821.447	470.822	140851	1924.73	307.864	196.916	21590.2	410.744	13766.6	1180.56	20628.5
132	M92T8	92.1	92.1	92.1	8.30881	8.06828	8.7472	46	3	0	0	4	0	1	0	3	2	1	5	1	0	3	0	2	5	4	3		1.02227e-05	2.84591e-06	143901	186.817	1271.5	2.07135e+06	1609.25	7470.05	7841	251833	93698.5	12357.8	467832	84737.4	788.061	128855	475.071	67060.6	273554	7.48087e+06	27006.7
133	M119T18	119.1	119.1	119.1	18.4262	17.7414	19.4609	31	0	0	0	3	1	0	0	0	0	0	4	0	0	0	3	1	1	2	0		1.02366e-05	2.84673e-06	3071.26	3637.71	1693.14	41381	9173.35	2657.77	4669.22	3393.34	5242.6	1694.18	13238.6	2217.43	1809.05	2163.85	37392.8	6432.09	8932.46	13455.6	4974.04
134	M103T9	103.1	103.1	103.1	9.03128	8.74003	9.17097	18	0	0	0	1	0	1	0	0	1	0	2	0	0	0	1	1	2	0	5		1.02964e-05	2.85023e-06	12173.2	23074.9	11159.4	23409.1	19507	18939.7	18246.9	15758.7	19098.4	9240.15	23406.2	11586.3	10399.5	12149.5	23934.9	39697.4	35863.8	16038	621132
135	M109T16	109.1	109	109.1	15.9914	15.4535	16.4002	57	3	0	1	3	1	0	3	2	0	1	4	1	0	4	1	2	5	4	5		1.03375e-05	2.85261e-06	26336.2	2013.19	3610.06	6240.32	11908.6	2746.81	14207.9	41556.3	2447	7133.79	67990.9	7815.37	3826.63	12731.3	28207.1	12478.8	21610	1.66396e+06	39088
136	M122T8	122.1	122.1	122.1	8.30875	8.17888	8.72972	37	3	0	0	4	0	0	0	3	2	0	5	1	0	2	0	1	5	4	4		1.08391e-05	2.90478e-06	10624.8	150.014	168.506	162167	268.957	631.268	672.443	18116.3	6849.31	961.55	40675	6275.1	259.032	9142.75	146.337	4434.33	32255	620437	7817.31
137	M205T15	205.2	205.2	205.2	14.5723	14.4204	15.087	23	0	0	0	3	0	0	0	2	1	0	0	1	0	0	2	0	4	2	0		1.08631e-05	2.9072e-06	14.6341	5.10215	47.1089	20456.7	827.353	7.17226	104.922	2822.93	4032.63	53.6363	264.836	1577.51	65.4588	2.76205	17167.6	162.668	34156.2	4847.57	874.995
138	M135T21	135.1	135.1	135.1	20.9164	20.6156	21.5541	14	0	0	0	4	0	0	0	0	0	0	0	0	0	0	1	0	2	3	0		1.09468e-05	2.91559e-06	1928.1	3095.89	1663.16	10227.7	2962.38	1779.66	1784.97	1931.42	2446	1480.94	4394.17	2068.53	1334.15	1639.78	4081.77	2306.46	20624.2	67372.8	1717.57
139	M91T29	91.1	91.1	91.1	29.0082	28.695	29.2252	6	0	0	0	0	0	0	0	0	0	0	0	0	0	0	0	0	1	0	5		1.11889e-05	2.93942e-06	23900.9	32618.1	25616.4	30217.9	26974.4	28653.9	27358	29309.5	30926.3	24086	31161	19409.1	19425.8	23616.6	30713.1	26991.2	31428	23388.7	98629
140	M81T15_1	81.1	81.1	81.1	14.7041	14.4179	15.087	46	2	0	1	4	0	0	0	3	2	1	5	2	0	0	1	2	5	4	1		1.11983e-05	2.94033e-06	26275.3	655.989	3725.42	440683	2402.68	674.68	1603.15	51343.5	20433.1	19220.9	72923.7	14883.8	1118.44	679.696	62523.7	23759.1	431242	469554	16244.2
141	M107T12	107.1	107	107.1	12.0341	10.9312	12.4402	66	2	0	0	4	0	0	0	1	1	1	5	1	2	0	3	1	5	4	4		1.18115e-05	2.9978e-06	7799.38	498.01	680.548	39773.7	382.349	634.545	1332.34	4055.53	4795.26	1937.52	110103	1036.09	45200	601.768	66021.8	6242.27	36185.2	42071.5	22538.4
142	M161T32_2	161.1	161.1	161.1	32.4221	32.1838	32.7329	20	0	0	2	0	0	1	0	0	0	1	0	3	0	0	0	0	2	1	0		1.19117e-05	3.00683e-06	92177.8	115928	84921.5	106139	93279.4	100200	96206.2	95039.7	108880	96961.7	106960	100805	80029.9	91969.8	107658	94532	77406.2	78856.1	81591
143	M62T8	62	62	62.1	8.31066	7.83067	8.7472	18	1	0	0	3	0	0	0	0	0	0	5	1	0	0	0	1	4	1	0		1.19157e-05	3.00718e-06	2092.34	365.044	298.105	24806	212.924	399.607	530.83	3126.74	1396.4	364.971	45212.5	1504.12	258.779	1740.93	697.17	1247.6	5543.74	67361.9	478.389
144	M207T27	207.1	207.1	207.1	27.1103	26.4877	27.4905	14	0	0	0	0	0	0	0	0	0	0	0	0	0	0	0	0	0	0	4		1.21613e-05	3.0289e-06	15988.2	18634.1	16015.1	18725.7	16162.6	17723.7	16986.3	17370	19579.6	15021.4	19516.1	13962.4	14016.2	15690.6	16152.7	14901.7	15500.7	14970.9	39873.4
145	M62T12	62	62	62.1	11.9634	11.5991	12.0565	10	0	0	0	0	0	0	0	0	0	0	2	0	0	0	2	0	1	1	4		1.22348e-05	3.03529e-06	34.6904	32.1569	23.2034	50.8228	38.9513	39.9294	63.6709	93.0947	34.1532	38.5077	8513.79	12.9961	0	27.6773	6734.9	40.0338	919.595	1851.7	338093
146	M91T30	91.1	91.1	91.1	29.839	29.6903	29.9764	62	4	3	3	3	3	4	4	3	4	3	5	3	2	4	3	3	4	4	0		1.22501e-05	3.03661e-06	85504.8	176099	94266.6	120067	124244	114564	114364	116727	118916	82463.5	151206	68316.1	59440.2	82271.1	147965	135758	87980.6	110922	22679.6
147	M207T28	207.1	207.1	207.1	28.1235	27.6929	28.6988	18	0	0	0	0	0	0	0	0	0	0	0	0	0	0	0	0	0	0	4		1.25263e-05	3.06014e-06	12871.8	18296	15761.4	16937.8	14657.3	16196.2	14266.8	15510.9	16833.7	14528.9	16401.1	12836.2	12558.7	13919.4	15828	15324.3	14560.4	13068.2	38518.5
148	M238T32	238.2	238.2	238.2	31.5738	31.5356	31.7797	7	0	0	0	0	0	0	0	0	0	0	0	1	0	2	1	0	2	1	0		1.25469e-05	3.06186e-06	2613.74	746.624	792.498	486.916	1272.21	411.933	530.844	533.044	360.103	1934.5	364.192	3133.29	3053.6	2793.31	2767.12	779.587	4771.21	3033.29	576.959
149	M51T11	51	51	51	11.0579	10.9208	11.1078	6	0	0	0	0	0	0	0	0	0	0	0	0	1	0	0	0	0	1	4		1.28765e-05	3.089e-06	17137.4	25109	19212.2	25480.7	20586.2	22263.9	20880.5	23247.2	25162.5	17339.9	26201.5	17184.8	23915.5	18468.2	23720.5	21275.1	20012	25780.1	104591
150	M183T20	183.1	183.1	183.1	19.6434	19.3329	19.6563	6	0	0	0	0	0	0	0	2	0	0	2	0	0	0	1	0	1	0	0		1.29758e-05	3.09699e-06	418.868	228.02	826.778	747.475	1053.29	215.843	323.55	9704.86	1981.63	372.363	4602.74	1313.38	364.653	564.431	1498.2	446.672	2510.52	836.984	448.752
151	M59T7	59.1	59.1	59.1	7.41627	6.86658	7.62038	23	0	1	1	1	0	1	1	0	1	1	0	0	2	4	2	0	0	2	4		1.31619e-05	3.11177e-06	30706.2	86538.2	61178.2	61402.9	31587.6	102737	59697.8	45924.3	110827	74652.3	48935.9	27322.4	128739	276923	112042	33323.5	24776.8	44097.8	128470
152	M120T14_2	120.1	120.1	120.1	13.6456	13.4479	13.9849	33	0	0	0	4	0	0	0	0	1	1	5	2	0	0	3	0	0	4	2		1.32294e-05	3.11705e-06	2795.72	2064.76	1089.28	12143.3	3468.41	1158.73	4249.18	4212.88	4740.2	5459.56	346503	11364.8	1242.53	914.929	1.07323e+06	4903.19	18980.2	22974.8	13250
153	M91T23	91.1	91.1	91.1	23.0932	23.0786	23.3041	4	0	0	0	0	0	0	0	0	0	0	0	0	0	0	0	0	1	3	0		1.35505e-05	3.14173e-06	3729.67	4698.9	3072.05	5202.6	5801.84	4493.84	4947.97	6130.13	4815.4	3015.48	9252.6	2906.56	2691.22	3677.06	5104.31	6970.5	47740.6	988341	2943.35
154	M87T30	87.1	87.1	87.1	29.9469	29.6098	30.3029	14	0	0	0	0	0	0	0	0	0	0	0	0	0	0	0	0	0	0	5		1.35788e-05	3.14386e-06	806420	1.11424e+06	932751	1.11709e+06	911298	954888	976137	1.04476e+06	1.07108e+06	825984	1.08659e+06	777573	721826	846767	1.10684e+06	989513	679980	808696	831026
155	M57T25_1	57.1	57.1	57.1	24.7815	24.5336	24.8062	20	0	2	0	4	0	0	0	2	3	0	5	0	0	0	3	0	0	0	1		1.37769e-05	3.15865e-06	82096.5	168511	62795.9	206879	103754	68641	64739	165834	188165	55865.3	299428	51664.5	49742.1	55553.9	303891	102129	64546.9	51932.3	50155.8
156	M64T16	64	64	64.1	16.1137	15.7054	16.1675	7	0	0	0	0	1	0	0	0	0	0	1	0	0	0	0	1	0	3	1		1.38094e-05	3.16105e-06	1451.26	1423.92	696.508	1496.99	1693.32	1340.16	1754.76	4714.95	1464.5	217.31	9549.94	1037.84	820.369	816.556	5171.06	2258.52	1419.59	217595	3719.53
157	M59T10	59.1	59.1	59.1	10.2762	9.87085	10.5638	8	0	0	0	0	0	0	0	0	0	0	3	0	0	0	0	0	0	0	1		1.40085e-05	3.17558e-06	25643.3	17238.4	10894.2	20613	11143.5	19336.6	16835.6	14478.1	13214.1	15514.3	78097.3	9436.44	14776.9	11828.5	19353.3	13505.6	10786.8	9001.03	27462.5
158	M124T16	124.1	124.1	124.2	15.9126	15.5166	16.5415	13	0	0	0	0	0	0	0	3	0	0	2	0	0	0	0	0	0	3	0		1.40927e-05	3.18164e-06	12335.4	295.42	522.234	946.462	3546.4	491.586	2051.58	93544	479.493	868.436	23800.7	816.062	1010.01	5164.37	790.778	1945.97	2376.1	464406	1432.43
159	M87T36	87.1	87.1	87.1	36.1711	35.6927	36.6827	26	0	0	0	0	0	0	0	0	0	0	0	0	0	0	0	0	0	0	5		1.41644e-05	3.18676e-06	749494	990582	792314	935011	809905	890782	820334	908656	996735	809603	905826	713492	712771	692646	955348	772982	590113	736172	1.01284e+06
160	M53T14	53	53	53.1	13.9032	13.4972	14.3962	15	0	0	0	4	0	0	2	0	0	1	0	1	1	0	0	0	1	2	2		1.42004e-05	3.18932e-06	2200.42	953.86	1792.34	495658	2033.72	905.729	2841.04	5597.17	2898.71	2504.9	11601.2	3773.34	3603.05	1034.57	15544.9	1815.66	23433.3	11032.2	8832.67
161	M160T25	160.1	160.1	160.1	24.7815	24.3106	24.8	8	0	0	0	1	0	0	0	0	1	0	3	0	0	0	2	0	1	0	0		1.44914e-05	3.20968e-06	3582.8	5564.22	2727.89	6405.71	3462.19	3531.39	3550.28	5677.8	6564.27	3233.41	9784.93	2854.29	2582.06	3060.59	11388	2757.59	6532.29	2210.28	1997.25
162	M104T8	104.1	104.1	104.2	8.30105	7.83067	8.7472	54	2	1	1	4	3	2	1	3	0	1	5	1	2	3	3	3	4	2	5		1.45473e-05	3.21353e-06	19328.1	22484.8	16066.2	94231.2	20768.4	18451.9	23253.4	26809.2	18681.8	12474.1	2.98865e+06	15438.2	13150.4	34736.2	55847.2	25295.5	46967.3	141318	35133.6
163	M70T7	70.1	70.1	70.1	7.27632	6.68838	7.77448	47	2	0	0	2	1	0	2	1	0	2	5	0	1	0	1	2	5	4	5		1.45657e-05	3.21479e-06	8556.87	4343.66	4721.11	6473.28	4996.41	4061.02	14218.4	7238.09	3415.39	11224.7	23986.3	4203.54	26369.5	2089.11	17488.1	12320.8	74828.1	55141.6	153483
164	M121T15	121.1	121	121.1	14.8248	14.4205	15.5417	71	4	0	1	4	2	1	1	1	1	2	5	3	0	0	3	2	5	4	3		1.47349e-05	3.22629e-06	84675.8	851.172	4317.25	1.89774e+06	5811.24	1945.54	3225.92	3317.71	10483.7	4657.95	32787.1	8038.05	870.771	757.956	250888	15222	67543.1	519567	11276.9
165	M161T14_1	161.1	161.1	161.2	13.8951	13.6321	14.2063	13	0	0	1	4	0	0	0	0	2	0	1	1	0	0	1	0	2	0	0		1.49092e-05	3.23795e-06	755.42	675.062	2357.98	1.50573e+06	1580.34	550.966	1240.29	4616.1	11144.5	621.023	4631.74	10680.4	968.02	662.19	715069	1318.02	72686.2	13415.6	1981.95
166	M104T14_2	104.1	104.1	104.1	13.8992	13.6846	13.9799	8	0	0	0	4	0	0	0	0	0	0	1	0	0	0	1	0	1	0	0		1.49739e-05	3.24223e-06	314.848	356.064	457.628	29413.5	880.821	364.022	254.8	399.476	293.135	420.125	23879.9	387.482	296.267	356.289	9674.45	322.052	2149.31	533.159	787.647
167	M295T20	295.1	295.1	295.1	20.0781	20.0669	20.0857	4	0	1	0	0	0	0	0	1	0	0	0	0	0	0	2	0	0	0	0		1.51727e-05	3.25522e-06	176.377	2310.8	212.486	2534.91	696.346	843.031	770.628	1638	1719.38	116.702	1480.49	228.48	44.0083	160.07	3775.63	133.474	225	60.0144	7.05021
168	M93T7_2	93.1	93	93.1	6.92257	6.61492	7.0509	51	0	0	1	4	1	1	3	3	2	0	5	1	0	1	1	2	5	4	5		1.51765e-05	3.25546e-06	3165.05	1012.98	3730.98	93985.1	9766.45	6084.16	55003.2	24516.7	18684.4	1447.5	37021.2	5257.41	3951.64	5026.23	8953.81	90090.3	5.33214e+06	2.23298e+06	263593
169	M104T32	104.1	104.1	104.1	31.7492	31.2802	32.3935	10	0	0	1	1	0	0	0	0	0	0	0	0	0	0	2	0	0	0	0		1.55391e-05	3.27854e-06	25040.3	30250.8	28929.7	38309.5	26365	28822.2	27508.8	28957	30281	22223.5	29754.1	23224.1	22272.1	24358.5	45726.5	27162	21567.9	23370.5	23077.8
170	M111T11	111.1	111.1	111.1	11.1078	10.5653	11.9265	45	2	0	0	1	0	1	1	3	2	0	4	0	0	0	1	0	4	0	5		1.55696e-05	3.28045e-06	12462.6	711.931	532.739	3404.55	1087.95	2899.78	3922.57	18525	14690.8	829.55	18126.3	452.659	2688.14	495.876	17051.7	6207.14	44930.5	923.817	834355
171	M53T24	53	53	53	24.311	24.3071	24.3145	4	0	0	0	0	0	0	0	0	0	0	0	0	0	0	0	0	0	4	0		1.56821e-05	3.28744e-06	3280.79	4269.85	3475.98	4122.76	3672.37	3713.75	3435.94	3522.64	4709.7	2783.43	4575.24	2771.27	2541.27	3857.75	4107.32	3828.88	7623.33	43273.2	2025.7
172	M213T24	213.1	213.1	213.2	24.2458	23.712	24.284	11	0	2	0	2	0	0	0	2	0	0	2	0	0	0	0	0	1	0	0		1.57916e-05	3.29417e-06	895.878	5952.84	1638.43	7348.87	1503.24	1416.87	1050.81	4334.5	5407.82	585.234	4827.3	727.788	629.85	806.109	5595.63	1763.26	22073.6	751.901	398.518
173	M137T7	137.1	137.1	137.1	6.93997	6.93158	7.15557	5	0	0	0	0	0	0	0	0	0	0	0	0	0	0	0	0	3	1	1		1.59545e-05	3.30407e-06	39.0128	107.177	44.4757	345.709	30.8285	134.926	941.532	98.041	107.983	30.9823	243.173	24.6708	755.369	52.2433	1151.66	377.719	36094.7	10565.2	2054.65
174	M94T8	94.1	94.1	94.1	8.30864	8.1715	8.71147	44	3	0	0	4	0	0	1	3	3	1	5	1	0	2	0	2	5	4	4		1.60964e-05	3.31257e-06	68357.9	273.228	568.961	988194	1068.66	3872.57	4402.69	119101	44781	5736.59	222528	40797.3	1083.35	60787.5	318.441	30994.2	117090	3.54077e+06	14237.1
175	M221T19	221.1	221.1	221.1	18.69	18.6683	18.7141	13	0	2	0	2	1	0	3	1	1	0	1	0	0	0	2	0	0	0	0		1.61405e-05	3.3152e-06	1346.04	7102	1436.72	8886.9	3808.13	4282.97	4580.31	4877.84	5660.65	1551.1	4642	1572.14	602.827	1309.37	8869.23	1808.59	1519.65	650.832	538.34
176	M136T7_2	136.1	136.1	136.1	6.92429	6.6315	6.95622	16	0	0	1	3	0	0	1	0	0	0	1	0	0	0	0	1	4	3	1		1.61885e-05	3.31804e-06	242.165	107.697	996.827	3265.97	269.869	281.773	2888.4	1165.91	788.364	99.7852	1528.21	265.462	236.84	245.104	550.56	3734.87	344973	90121.4	15767.6
177	M68T11	68.1	68	68.1	11.0665	10.9102	11.3176	13	1	0	0	1	0	0	0	1	0	0	1	0	1	0	1	0	1	0	5		1.62595e-05	3.32222e-06	9865.94	511.546	1039.23	8682.15	972.268	2378.75	1788.83	19240.3	2781.01	4389.63	17299.3	537.449	7283.7	413.275	12533.3	5027.09	14867.2	2759.8	510897
178	M146T17_2	146.1	146.1	146.1	17.406	17.4055	17.4096	4	0	0	0	4	0	0	0	0	0	0	0	0	0	0	0	0	0	0	0		1.63213e-05	3.32584e-06	741.103	929.34	541.857	11692.4	1050.32	685.34	1162.9	1107.55	988.503	339.718	1563.18	508.274	304.736	465.164	1470.72	1246.72	1642.49	762.417	2142.91
179	M145T27	145.1	145.1	145.1	27.2463	27.1014	27.46	5	0	2	0	0	0	0	0	0	0	0	0	0	0	0	0	0	0	0	0		1.63761e-05	3.32903e-06	44320.1	55332.3	42239.2	50374.8	44615.9	46107	44582.3	48764.7	51431.9	41117.1	50660.4	38413.2	37855.8	42255.1	50000.6	43520.9	42725.6	37887.2	43213.6
180	M82T11	82.1	82.1	82.1	11.2962	10.8699	11.4773	26	1	0	0	4	0	0	1	1	4	0	1	1	0	0	0	2	5	1	5		1.64508e-05	3.33336e-06	13672.3	644.828	553.386	105211	1450.48	432.787	6145.48	30339	129948	1092.11	5358.68	28275.9	1783.83	520.707	891.327	9202.1	223653	8767.24	60420.5
181	M204T18	204.2	204.2	204.2	18.1417	17.7301	18.5047	11	0	0	0	3	2	0	0	0	0	0	1	0	0	0	2	0	2	1	0		1.6568e-05	3.34009e-06	67.5538	0	0	32776.6	4551.99	0	0	177.832	588.929	31.4471	1951.36	171.824	8.64703	20.4006	13703.6	38.7118	11456.6	1089.3	39.3417
182	M93T18_2	93.1	93.1	93.1	18.4908	18.3439	18.716	10	0	0	0	3	1	0	0	0	0	0	0	0	0	0	2	0	0	3	0		1.65775e-05	3.34064e-06	457.448	295.779	319.082	26258.1	5031.18	293.135	596.714	531.244	655.765	321.733	1268.26	393.78	247.576	344.175	28485.5	586.04	1998.96	58775.2	633.631
183	M75T12	75	75	75	12.0395	12.033	12.0576	6	0	0	0	0	0	0	0	0	0	0	1	0	0	0	3	0	0	2	0		1.6778e-05	3.35199e-06	4081.33	3345.73	3131.46	3720.26	3228.79	3424.46	3634.98	5391.46	3129.48	4191.73	39171	2830.56	3148.42	3072.85	30475.4	3663.26	3116.03	15733.2	4927.17
184	M60T19	60	60	60	19.0146	18.997	19.0354	8	1	0	0	0	0	0	0	0	0	1	0	0	0	4	0	0	2	0	0		1.68205e-05	3.35437e-06	17811.5	4696.3	3774.21	4372.95	4640.42	4416.91	4576.4	4484.29	3855.27	9153.56	4176.02	4622.86	4885.87	47568.5	4359.19	5220.28	12880.7	6723.25	2442
185	M147T20	147.1	147.1	147.1	20.0644	19.8307	20.0933	8	0	1	0	1	2	0	0	1	1	0	0	0	0	0	1	0	1	0	0		1.69366e-05	3.36083e-06	5145.25	13287.6	5251.08	14528.6	10403.1	8554.55	9336.18	10716.9	12205	5501.98	11412.8	5120.61	4478.94	4965.3	15870.7	6007.3	13289.8	5740.71	4511.59
186	M55T8	55.1	55.1	55.1	8.30147	8.04262	8.34648	30	3	0	0	4	0	0	0	2	0	0	5	1	0	2	0	1	2	4	5		1.69458e-05	3.36134e-06	56175.4	5275.15	4271.54	594911	6809.16	7808.75	11053.7	83588.7	29769.2	8325.48	971290	31799.9	21157.2	43396.9	10336.9	32415.3	102374	1.72724e+06	3.81586e+06
187	M135T14_2	135.1	135.1	135.1	13.918	13.6808	13.9812	10	0	0	0	1	0	0	0	0	0	0	4	0	0	0	1	0	2	0	2		1.70536e-05	3.36728e-06	455.627	448.255	812.812	194768	1277.55	384.369	745.736	1293.34	1353.1	328.213	108914	1439.44	615.219	337.069	22535.7	1027.99	9265.02	2795.29	15069.3
188	M69T9	69.1	69.1	69.1	9.15903	8.67477	9.288	69	2	0	3	4	3	1	3	3	4	3	5	3	2	0	3	3	5	4	5		1.70665e-05	3.36798e-06	9699.24	2599.57	58285	1.32692e+06	646666	13287.7	66681.4	135028	1.08416e+06	355224	1.24318e+06	529135	83277.6	2025.44	348891	2.3656e+06	371729	28014.6	984213
189	M145T14	145.1	145.1	145.1	14.4202	13.8905	14.7096	19	0	0	0	3	0	0	0	0	1	0	1	0	0	0	2	0	5	0	0		1.71148e-05	3.37063e-06	667.575	429.937	392.426	18238.9	495.19	334.206	540.511	2601.44	3509.67	255.358	2646.49	1180.57	288.112	289.731	26037.4	379.997	30473.1	856.859	941.753
190	M39T14_2	39	39	39	13.7808	13.6227	13.9776	30	0	0	0	0	0	0	0	0	1	0	5	2	0	0	3	0	5	2	1		1.72204e-05	3.37636e-06	6075	3691.05	3233.94	7387.44	5396.45	3636.24	5623.58	6542.42	5829.44	5665.1	32774.2	7130.75	4425.29	3072.3	62485.8	4940.79	33821	12496.7	28842.3
191	M229T29	229.2	229.2	229.2	28.5504	28.5008	28.5655	5	2	0	0	0	0	0	0	0	0	1	0	0	0	1	0	0	0	1	0		1.7536e-05	3.40059e-06	3678.56	585.955	1117.39	455.507	1863.73	474.678	465.699	386.837	432.86	3260.93	509.727	2300.51	1656.67	3625.69	357.675	1811.67	2738.15	2350.61	488.053
192	M67T11	67.1	67	67.1	11.2941	10.7257	11.4773	21	1	0	0	3	0	1	0	1	2	0	0	1	0	0	0	0	4	0	5		1.77081e-05	3.41359e-06	13059	781.506	554.218	115637	1368.7	3571.85	2090.86	34300.6	139323	1156.8	4537.83	29875.9	2966.72	813.898	1553.11	1353.77	249935	11784	5.53477e+06
193	M91T16	91.1	91	91.1	16.1443	15.6939	16.7888	44	4	0	0	1	1	0	0	2	0	2	5	0	1	1	2	1	2	4	5		1.79083e-05	3.42851e-06	83900.3	7670.3	3342.88	13394.3	14136.4	6732.97	14606.6	78248.8	8483.02	23088.9	134417	7425.01	63947.4	5336.04	68554.7	26259.8	15843	3.70672e+06	200376
194	M38T16	38	38	38.1	16.1129	15.8259	16.438	11	0	1	0	0	0	0	1	0	0	0	2	0	0	0	1	0	0	4	2		1.80906e-05	3.44193e-06	1613.11	1377.3	710.37	1103.84	1300.23	1039.13	1538.82	7207.94	1205.53	657.095	11346.1	1072.61	889.822	863.318	6722.45	2296.89	985.066	232239	4975.97
195	M95T10	95.1	95	95.1	10.4058	9.77947	10.8251	55	4	1	2	2	3	1	3	3	1	2	5	3	1	1	3	2	5	1	3		1.86974e-05	3.48539e-06	17803.3	6735.84	7729.46	11133.5	16534.9	5112.43	20255	18005.8	4513.05	18749.3	38817.3	8168.56	11609.2	7707.9	11906.8	22030.6	49461.3	11484.9	157671
196	M128T14	128.1	128.1	128.1	13.9688	13.9032	13.9812	3	0	0	0	2	0	0	0	0	0	0	0	0	0	0	1	0	0	0	0		1.87209e-05	3.48704e-06	476.334	324.782	352.771	14582.8	525.073	311.347	473.422	579.703	492.221	338.178	1082.76	391.019	338.32	294.878	14902.1	566.2	2097.18	410.747	1025.9
197	M77T14	77	77	77.1	13.8962	13.4297	13.988	20	0	0	1	4	0	1	0	0	1	2	1	0	3	0	2	0	1	2	1		1.8749e-05	3.489e-06	3194.86	1552.67	5636.18	726551	20119.2	3403.51	3464.25	5356.78	4714.11	4285.85	168187	7464.94	5907.42	1867.14	1.53109e+06	5934.72	33292.6	13428.6	349327
198	M80T7_2	80.1	80	80.1	6.93233	6.6315	7.04727	13	0	0	0	0	1	0	0	0	0	0	0	0	0	0	0	0	5	4	1		1.8771e-05	3.49054e-06	421.654	395.741	479.923	5817.28	1640.07	470.422	3411.64	1223.72	839.525	371.634	2172.02	460.714	678.149	580.259	884.678	6391.38	497226	203727	13335.9
199	M39T7_2	39	39	39	6.93005	6.6315	7.10407	26	1	0	0	1	0	1	4	0	1	0	0	0	1	0	0	1	5	4	5		1.88665e-05	3.49719e-06	5432.12	4262.14	4142.43	12880.8	4005.58	9010.33	22141	7205.2	6745.26	3806.55	8005.7	3730.17	20506.4	3912.64	11686.9	12681.1	426023	206080	48904.1
200	M63T14_2	63	63	63	13.5349	13.1051	14.0027	16	2	0	0	0	0	0	0	1	0	2	3	0	0	0	0	0	3	1	1		1.90031e-05	3.50663e-06	2284.34	276.557	505.565	1074.16	446.072	308.878	1106.77	1578.82	420.37	2632.13	26905.7	663.191	1586.54	320.902	41053.3	683.056	2819.16	3279.83	5033.16
201	M43T14_1	43	43	43.1	14.1736	13.8864	14.5466	21	2	0	0	4	0	0	0	0	0	0	0	0	0	2	0	0	3	4	2		1.90717e-05	3.51134e-06	53742.5	34420.8	29284.6	235658	37604.1	31083.7	36333	38677.4	33173.3	30584.2	59551.5	32028	35082.4	34555.6	46442	42751.5	69387.4	81277.6	84318.1
202	M82T25	82.1	82.1	82.1	24.7834	24.7177	25.26	13	0	2	0	1	0	0	0	1	2	0	3	0	0	0	3	0	0	0	1		1.91993e-05	3.52004e-06	8139.27	18448.3	5787.88	21485.6	10383.4	6582.25	6358.75	17431.8	19649.1	5124.33	31747.8	6599.16	3744.05	5733.08	33495	9748.78	12079.1	4904.25	6755.18
203	M66T14	66.1	66	66.2	13.8902	13.4177	13.939	9	0	0	0	4	0	0	0	0	0	0	2	0	0	0	0	0	1	0	1		1.92983e-05	3.52673e-06	250.789	106.912	124.933	95176.8	297.336	132.241	146.14	373.168	289.083	261.782	10896.8	280.882	290.656	126.441	2390.52	267.451	3458.35	1075.71	20873.3
204	M106T13	106.1	105.9	106.1	13.0937	12.766	13.2961	31	0	0	1	4	2	0	0	2	3	0	2	2	0	0	2	1	5	3	0		1.9693e-05	3.55302e-06	2581.6	73.6536	14847.3	1.73462e+06	54310.1	468.702	458.197	30989.2	23742.6	103.382	17936.3	26161.5	5081.85	37.7057	14338.9	6429.92	79967.1	312159	351.652
205	M79T8	79.1	79	79.1	8.30881	8.1791	8.73403	46	3	0	1	4	0	3	2	3	3	0	5	1	0	3	0	2	5	4	2		2.00734e-05	3.57773e-06	217862	467.247	2247.75	2.97789e+06	3199.95	14203.2	17121	384238	142718	16940.5	765766	129191	4273.78	196253	2248	103586	350347	1.04656e+07	31198.9
206	M44T7	44	44	44	7.2527	7.20552	7.43438	9	0	0	0	0	0	0	0	0	0	0	3	0	0	1	0	1	1	1	2		2.01999e-05	3.58581e-06	56131.5	64505.1	52690.4	62093.8	57530.4	60128.3	60273.8	57604.8	60699	54702.7	72944.1	46841.6	49344.6	48541.7	65034.9	54018.6	49519.2	41541.7	61508
207	M152T15	152.1	152.1	152.1	15.0792	14.6899	15.2437	13	0	0	0	0	0	0	0	0	0	0	2	0	0	0	0	1	1	4	4		2.02782e-05	3.59078e-06	13585.1	326.488	5479.03	919.071	8205.7	1940.84	2114.75	32497.1	4307	572.77	12489.2	9540.9	234.287	327.203	1303.16	59254.3	10098.2	4.14835e+06	55909
208	M121T8	121.1	121.1	121.1	8.30875	8.03063	8.34648	52	3	0	0	4	2	3	2	3	3	1	5	1	1	3	1	2	5	4	5		2.03244e-05	3.5937e-06	107704	582.35	1492.43	1.61286e+06	2473.05	6610.63	8773.31	183077	68820.7	9544.37	355569	64017.6	8108.84	95894	3123.34	48052.8	293056	6.3769e+06	46247.7
209	M46T12_2	46	46	46	12.1434	12.1355	12.1513	2	0	0	0	0	0	0	0	0	0	0	0	0	0	0	0	0	0	2	0		2.03649e-05	3.59625e-06	2744.24	2891.38	2229.64	2982.56	2582.12	3015.83	2534.68	2794.89	3187.15	2818.93	3079.13	2062.04	2246.23	2709.7	3239.18	2870.75	2228.11	10557.9	5813.71
210	M161T12	161.1	161.1	161.1	12.1105	11.6069	12.36	10	1	0	0	0	1	0	1	0	0	0	1	1	0	0	0	1	3	0	1		2.06864e-05	3.6163e-06	1974.69	671.877	707.857	20159.5	5675.08	901.808	1728.66	11940.4	20149.2	781.355	1123.43	3762.53	1855.51	661.179	1676.49	2055.64	43523.2	944.409	2715.61
211	M161T19	161.1	161.1	161.1	19.1355	18.9195	19.3194	7	0	0	0	0	0	0	0	1	1	0	1	0	0	0	2	0	1	1	0		2.08254e-05	3.62484e-06	2421.38	2041.44	2070.98	7821.72	3451.38	1711.41	2846.03	6071.09	8995.69	2064.33	6477.2	2536.32	1949.56	1997.48	42680.1	2633.39	29729.5	2929.52	2234.59
212	M84T25	84.1	84.1	84.1	24.7834	24.7177	25.26	21	0	2	0	4	0	0	0	2	4	0	5	0	0	0	3	0	0	0	1		2.08757e-05	3.62791e-06	2453.83	36864.5	2514.8	50370.2	2098.67	4904.71	2125.39	35778.7	45344.1	1219.54	69726.7	1505.66	616.538	1725.26	85564.7	1696.38	2397.73	1023.53	8755.41
213	M79T14	79.1	79	79.1	13.8992	13.5864	13.9817	18	0	0	0	4	0	0	0	0	0	0	2	0	1	0	2	0	4	1	1		2.13026e-05	3.65361e-06	2089.8	851.108	2112.3	1.52642e+06	3923.07	892.096	1912.24	9699.05	5850.49	9183.48	18591.3	7018.8	6219.89	530.73	140286	1760.8	71761.2	27414.3	20463
214	M189T12_2	189.2	189.2	189.2	12.2347	12.2168	12.2398	5	0	0	0	3	1	0	0	0	0	0	0	0	0	0	1	0	0	0	0		2.1359e-05	3.65696e-06	153.338	36.8382	34.4654	36172.5	2604.02	348.702	888.628	1610	292.491	0	35.6339	422.928	128.801	3.48861	1668.17	72.9272	5480.71	78.357	218.714
215	M114T10_1	114.1	114.1	114.1	10.4028	10.1623	11.0447	27	3	0	0	1	2	0	1	0	0	1	4	0	1	0	1	2	2	1	4		2.14296e-05	3.66113e-06	6398.8	2624.96	2107.9	2950.67	5579.13	1419.33	6678.59	5045.99	1407.93	6256.33	11694.5	2639.89	2182.04	1210.97	3487.38	6660.32	5115.94	2018.01	113975
216	M137T8	137.1	137.1	137.2	8.31748	8.18287	8.75405	20	0	0	0	1	0	0	0	0	0	0	1	0	0	1	0	1	3	4	3		2.1593e-05	3.67071e-06	4391.25	40.5763	63.4933	47946.5	109.422	423.285	362.883	6574.96	2530.26	388.798	12541.2	2978.51	960.194	3613.87	313.013	2188.01	20768.2	373933	10597.9
217	M115T9	115.1	115.1	115.1	9.0369	8.88218	9.17043	11	1	0	0	2	0	0	0	1	0	0	1	0	0	0	0	1	0	0	5		2.16271e-05	3.6727e-06	9840.48	18754.3	6278.96	17182	15255.2	13963.2	12696	10340.8	15758	2081.59	17478.4	7078.15	3512.89	5094.71	22071.6	25991.8	12712.4	8316.43	200971
218	M81T7_1	81.1	81.1	81.1	7.45795	7.39555	7.6732	26	0	0	2	0	0	0	2	0	1	0	0	0	1	0	1	0	5	4	5		2.17389e-05	3.67919e-06	2521.84	2434.93	5327.54	5963.62	3184.66	5032.77	53714.8	2574.26	3465.42	2462	8004.59	3653.76	19035.7	3260	8464.37	6571.25	872354	284327	425743
219	M113T13	113.1	113.1	113.1	13.1517	12.6702	13.4205	19	1	0	0	1	0	0	1	0	0	0	4	1	0	0	0	0	1	1	5		2.1807e-05	3.68313e-06	3468.16	1079.98	1325.06	8389.31	3994.03	990.743	3205.37	2347.99	1968.67	882.749	10499.2	2433.8	1163.88	1629.03	3842.34	4624.12	3367.28	1931.62	564452
220	M60T7_2	60	60	60	6.86415	6.83675	6.89965	5	0	0	0	0	0	0	0	0	0	0	0	0	0	0	0	0	0	0	5		2.18548e-05	3.68588e-06	2680.97	3751.49	2991.92	3764.74	3296.53	3344.63	3494	3193.19	3703.83	2914.04	3521.22	2721.49	2334.73	2551.57	3836.16	3064.88	3042.44	2493.89	149861
221	M108T14	108.1	108.1	108.1	13.953	13.6785	14.025	19	0	0	0	4	0	0	0	0	1	1	1	0	0	0	1	0	4	2	1		2.21183e-05	3.70089e-06	541.473	139.587	650.06	162261	1169.61	236.955	523.568	2703.78	1311.77	2115.18	3909.17	869.698	1336.82	125.157	16789.4	494.612	21071.2	10523.3	4562.73
222	M91T15	91.1	91	91.1	14.706	14.1983	15.5643	61	2	0	1	4	1	0	0	3	2	1	3	2	0	0	2	1	5	4	5		2.21906e-05	3.70497e-06	34612.7	3541.75	3645.37	646931	10082.2	3876.02	5737.4	66328.9	50569.6	10006.7	87975.4	16836.8	1309.84	2141.77	86039.8	27235.7	580544	132300	106898
223	M110T15_1	110.1	110.1	110.1	14.685	14.4068	15.087	17	1	0	0	3	0	0	0	0	0	0	1	0	0	0	2	0	2	3	1		2.22377e-05	3.70762e-06	1681.22	516.895	454.397	21026.3	1126.44	463.06	752.907	857.782	687.697	3204.91	3665.93	668.84	338.687	447.972	10527	1221.8	8031.82	36803.5	6427.25
224	M140T16_1	140.1	140.1	140.1	15.5143	15.4626	15.8299	4	0	0	0	0	0	0	0	0	0	0	1	0	0	0	0	0	0	3	0		2.24272e-05	3.7182e-06	504.687	236.512	204.271	566.851	507.924	191.037	412.49	457.875	362.933	138.157	4233.63	298	130.977	217.279	412.952	615.524	637.503	36222	6495.53
225	M55T16_1	55.1	55	55.1	16.0919	15.8077	16.3908	12	0	0	0	0	0	0	0	0	0	0	0	0	0	0	0	1	0	4	1		2.26666e-05	3.7314e-06	13348.8	2635.03	2557.23	5736.82	8890.42	2175.19	7448.67	6052.99	3316.62	4252.66	16165	4115.19	2048.46	1103	6024.98	11101.1	9462.18	1.69533e+06	24437.9
226	M110T15_2	110.1	110.1	110.1	15.4945	15.2379	15.8299	11	0	0	0	0	0	0	0	0	0	0	2	0	0	0	0	0	3	4	0		2.27899e-05	3.73812e-06	568.116	259.161	274.868	923.879	663.737	163.689	865.785	363.241	297.867	582.288	175094	457.125	472.407	586.591	651.222	627.4	7224.67	100414	2505.94
227	M104T39	104.1	104.1	104.1	39.2526	38.6692	39.9121	22	0	0	0	2	1	1	0	1	0	0	2	0	0	0	0	0	0	0	1		2.28992e-05	3.74404e-06	47297.8	61933	50019.6	54924.1	46681.7	53826.4	54486.4	39369.9	58083.5	46091.9	73401.7	44335.2	43227.6	47453.8	57202	52741.9	43044.4	42822.1	41693.9
228	M161T26	161.1	161.1	161.1	26.4763	25.6265	26.7507	19	0	0	0	0	0	0	0	0	0	0	0	3	0	2	0	0	2	1	0		2.29525e-05	3.74691e-06	86158.6	102762	86488.6	95162.3	85598.5	93054.8	92261.9	92457	99032.9	85363.1	97062.7	83734.7	77695.7	78195.2	95817.7	88415.6	85875.3	67017.9	68950.3
229	M80T8	80.1	80.1	80.1	8.30892	8.06115	8.7472	40	3	0	0	4	0	0	1	3	3	1	5	1	0	3	0	2	5	4	1		2.30726e-05	3.75335e-06	216417	336.933	1600.14	2.97761e+06	2740.97	11137.2	13707.6	377041	141697	18338.4	689101	127258	1876.73	196743	1109.57	100381	355861	9.98363e+06	13699
230	M92T7_2	92.1	92	92.1	6.93236	6.6315	7.16685	24	0	0	0	1	0	1	2	0	1	0	1	0	2	0	0	1	5	4	4		2.32425e-05	3.76456e-06	302.128	221.708	310.744	8018.93	627.035	3952.89	12761.6	1609.89	1475.14	192.791	3420.48	418.826	20962.1	333.73	9280.63	9601.71	657371	256072	35644.7
231	M56T10_2	56.1	56	56.1	9.72562	8.8847	9.98317	69	3	1	0	3	1	2	3	3	4	2	5	2	3	0	3	1	3	2	5		2.3554e-05	3.78598e-06	70240.8	15978.7	9770.68	71814.8	13258.3	22468	30253.9	154394	38960.3	32723.6	55034.6	12463.3	58708.9	3527.37	52318.1	16159	19230.2	54549.6	408807
232	M53T11	53	53	53.1	11.1288	11.083	11.3169	6	0	0	0	1	0	0	0	0	0	1	0	0	0	0	0	0	0	2	1		2.37013e-05	3.796e-06	4495.01	1363.84	1419.05	3850.53	1870.76	1778.78	2973.67	6241.07	2491.33	3359	7094.7	1091.85	3965.84	1302.52	4613.74	3299.15	4808.4	6052.01	141006
233	M178T18	178.1	178.1	178.2	17.5383	17.3886	17.5454	3	0	0	0	0	0	0	0	0	0	0	0	0	0	0	2	0	1	0	0		2.40616e-05	3.8202e-06	372.021	224.846	211.935	2704.15	328.704	195.481	302.764	253.828	264.341	143.54	1548.8	231.132	117.167	105.211	48432	321.743	7434.71	162.557	236.261
234	M117T18	117.1	117.1	117.1	17.8321	17.8184	18.0132	9	0	0	0	1	0	0	0	0	0	0	2	0	0	0	3	0	0	3	0		2.46427e-05	3.85836e-06	8416.71	9032.36	7757.74	13172.8	9884.92	8891.96	9111.98	10120.6	9391.33	7724.49	37676.4	7149.21	7713.33	7437.77	38239.3	9793.06	7482.08	33972.4	11598.6
235	M107T8	107.1	107.1	107.1	8.30876	8.1753	8.34648	44	3	0	0	4	0	1	2	3	2	1	5	1	0	3	0	2	5	4	4		2.48253e-05	3.87013e-06	45137.2	322.815	685.154	657141	896.486	2291.64	3435.39	76365.2	28483.8	4142.81	147234	26348.8	1825.54	40409.8	492.312	20414.4	90555.1	2.50731e+06	11828.5
236	M72T11	72.1	72.1	72.1	11.0874	10.855	11.2979	19	0	0	0	4	0	0	1	1	1	3	2	0	1	0	0	0	0	0	4		2.49039e-05	3.87517e-06	13667.5	7592.63	8765.02	40428.6	10066.2	7860.72	16370.2	28086.2	12590.1	28086.5	31769.7	6305.43	22132	6462.79	12364.5	8326.97	7873.95	7240.18	55641.7
237	M67T8	67.1	67	67.1	8.30882	8.07263	8.34648	29	4	0	0	4	0	1	1	2	1	0	3	1	0	2	0	2	3	4	0		2.49181e-05	3.87607e-06	58750	1135.28	1055.56	767617	1246	3309.53	3739.26	97353.6	36052.2	5356.01	230856	37739.5	4123.2	46594.7	1696.49	27211.9	91871.1	2.64473e+06	5128.17
238	M161T38_2	161.1	161.1	161.1	37.716	37.472	38.0973	23	0	0	1	0	0	0	0	0	0	0	1	1	1	2	0	2	2	0	0		2.50184e-05	3.88247e-06	93132.6	114448	101418	107950	94017.7	97807.8	97862.6	100877	111736	91675.6	102019	77952.8	91861.3	88345.4	102096	117650	88021.6	81779.9	73315.3
239	M117T14	117.1	117.1	117.1	13.8946	13.6842	13.9812	8	0	0	0	4	0	0	0	0	0	0	0	0	0	0	2	0	1	0	1		2.50711e-05	3.88581e-06	5007.62	4808.51	4353.25	89066.3	4809.17	4378.21	5406.15	5715.85	4352.5	4547.05	8391.71	4327.34	4199.03	4745.66	39475.4	4883.88	12090.1	4393.29	10533.6
240	M96T13	96.1	96.1	96.1	13.1	12.7925	13.5112	18	1	0	0	4	1	0	1	1	0	0	0	2	1	0	0	1	1	0	3		2.53267e-05	3.90194e-06	5294.87	556.067	1858.92	168521	7339.38	492.42	2343.77	4806.26	2114.62	1420.36	9719.34	3474.35	3926.73	353.799	3056.48	3023.28	8539.54	899.321	127627
241	M199T25	199.2	199.1	199.2	24.7777	24.7185	24.7872	6	0	0	0	0	0	0	0	1	0	0	3	0	0	0	2	0	0	0	0		2.58258e-05	3.93287e-06	260.155	3636.78	380.276	5744	271.386	482.17	347.259	4152.17	4287.2	259.952	9419.97	154.189	226.546	408.788	12277.2	314.711	1308.22	216.133	320.111
242	M96T10	96.1	96.1	96.1	10.4057	9.7219	10.4182	47	3	1	2	3	3	0	3	3	0	2	5	2	1	0	1	3	5	2	5		2.59339e-05	3.93948e-06	15824	6532.46	6807.66	9169.68	15594.1	3691.37	18336.9	15277.8	4149.67	17300.4	32752.9	7163.26	7222.51	5063.84	9805.09	20059.5	23002.9	8443.26	45690.3
243	M193T30	193.1	193.1	193.1	29.8676	29.6865	29.9764	32	1	2	1	4	2	4	3	1	1	0	4	1	1	0	0	2	3	2	0		2.59522e-05	3.94059e-06	4649.33	11721.3	5820.01	9534.73	7700.13	7240.31	7693.94	7245.07	7409.99	3828.33	10877.7	2918.2	3169.29	4215.93	8047.52	8840.54	4477.3	5073.69	2430.95
244	M46T12_1	46	46	46	11.6827	11.6156	11.6847	3	0	0	0	1	0	0	0	0	0	0	0	0	0	0	0	0	0	2	0		2.67823e-05	3.99019e-06	2172.2	2301.92	1865.55	3175.37	2019.91	1883	1945.95	1994.22	2155.59	1841.78	2524.42	1661.33	1580.59	1602.2	2279.89	1729.68	1736.56	10131.2	4919.99
245	M83T25	83.1	83.1	83.1	24.7872	24.7148	25.6265	23	0	2	0	4	0	0	0	2	4	0	5	0	0	0	3	0	1	0	2		2.67932e-05	3.99083e-06	13525.7	65703	12780.9	84195.8	13403.8	18379.8	14525.5	64201.9	74115.1	9994.54	113949	10493.5	7031.53	13888.7	138967	16416.5	20849.5	11502.1	24028.3
246	M68T18	68.1	68.1	68.1	18.4373	18.0132	18.7307	8	0	0	0	1	0	0	0	0	0	0	0	0	0	0	1	0	0	4	0		2.69008e-05	3.99713e-06	714.57	677.946	368.757	2296.99	497.833	434.752	480.429	588.335	605.53	572.456	1206.19	409.906	316.577	388.131	5312.91	555.288	726.17	77331.4	818.486
247	M80T15	80.1	80	80.1	14.823	14.3633	15.6916	47	2	0	1	4	0	0	0	1	1	1	4	1	0	0	2	1	5	4	2		2.71549e-05	4.01186e-06	11775.3	263.003	739.086	169924	593.371	297.635	393.626	5237.13	10929.5	1238.2	67171.1	9921.8	431.322	203.352	42556.4	21618.8	142718	611141	14149.6
248	M92T18	92.1	92	92.1	17.9023	17.6844	18.1713	8	0	0	0	1	0	0	0	0	0	0	1	0	0	0	1	0	0	2	1		2.75162e-05	4.03252e-06	776.69	369.024	413.831	6103.77	863.795	430.765	708.297	532.472	529.492	439.048	11641	385.28	293.325	889.43	8296.78	778.546	1923.23	15665.2	2241.01
249	M121T14	121.1	121	121.1	13.9601	13.596	14.2851	55	0	0	1	4	1	0	2	3	2	0	5	2	3	3	3	2	5	4	2		2.76368e-05	4.03935e-06	2542.88	545.665	3098.52	784572	6786.26	783.496	2192.38	16655.2	10673.6	503.698	53821.6	6902.98	7504.82	18146.7	114496	6380.84	50030.9	10985.9	6480.6
250	M78T12	78.1	78	78.1	12.033	11.6222	12.1102	11	0	0	0	2	1	0	0	0	0	0	2	0	1	0	1	0	0	1	3		2.76859e-05	4.04211e-06	1980.79	405.537	673.935	10382.1	717.029	683.863	1894.28	7032.22	1072.85	2222.77	175619	720.036	1324.61	619.472	112557	839.754	2048.43	55227.3	52624.4
251	M89T16	89.1	89.1	89.1	16.1209	15.7055	16.4508	33	3	0	0	3	3	0	1	0	0	2	1	2	0	0	0	2	4	4	3		2.78906e-05	4.05359e-06	84843.1	44870.9	34769.6	56855.5	84915.8	41975.9	66787.8	73445	32613.2	62756.2	126802	44571.3	28331.6	38747.9	65572.8	110345	68241.3	1.69713e+06	81315.6
252	M91T8_1	91.1	91.1	91.1	8.31418	8.03338	8.7613	58	3	0	0	4	0	1	2	3	2	1	5	1	1	3	1	2	5	4	5		2.84954e-05	4.08689e-06	258275	1123.97	3163.9	3.60366e+06	4746.33	14824	20834.4	447480	169548	22616.7	832402	153731	15397.5	234211	8682.93	120841	582499	1.28017e+07	91016.5
253	M81T10	81.1	81	81.1	10.4051	9.8074	10.7522	50	3	1	1	4	3	0	3	2	0	1	4	2	1	0	2	1	5	4	4		2.88644e-05	4.10678e-06	18813.4	6614.77	7436.67	23855.8	17105	5023.72	21216.3	17950	5226.79	18673	36363.4	8506.78	11913.4	7128.68	13366.6	21584.6	46383	29748.7	234697
254	M52T14	52.1	52	52.1	13.9032	13.8902	13.9624	7	0	0	0	4	0	0	0	0	0	0	1	0	0	0	1	0	1	0	0		2.90154e-05	4.11483e-06	122.772	53.1499	38.1302	49850.9	141.762	107.357	145.346	278.707	140.984	117.321	7043.31	126.501	57.7401	52.9043	2240.6	75.2221	1438.31	259.14	221.578
255	M190T13	190.2	190.2	190.2	12.953	12.8153	13.1158	10	0	0	0	4	1	0	0	0	0	0	0	0	0	0	0	0	5	0	0		2.90863e-05	4.11859e-06	20.2396	8.15864	23.0995	246043	2432.55	0	9.92232	113.519	32.8277	0	25.7718	25.7016	30.568	0	77.2322	0	87843.4	31.0736	32.2448
256	M93T19	93.1	93.1	93.1	19.1025	18.9342	19.2359	7	0	0	0	0	0	0	0	0	0	0	0	0	0	0	1	0	2	2	1		2.91228e-05	4.12052e-06	997.024	643.978	712.372	11235.6	1049.67	481.366	1596.06	1917.63	1313.21	510.841	3198.61	776.648	391.629	842.03	12558.1	1075.34	20235.5	19046.7	4813.53
257	M178T19	178.1	178.1	178.1	18.7676	18.7613	18.769	4	0	0	0	0	0	0	0	0	0	0	4	0	0	0	0	0	0	0	0		2.92136e-05	4.12531e-06	462.977	256.491	232.641	2153.59	432.215	187.838	384.932	325.038	362.826	307.602	8146.26	259.731	195.321	284.08	1125.46	575.579	620.245	219.528	1100.94
258	M72T16_2	72.1	72.1	72.1	16.0024	15.8299	16.2717	7	0	0	0	0	0	0	0	0	0	0	0	0	0	0	0	0	0	4	0		2.93438e-05	4.13215e-06	7664.61	9618.85	8322.71	10451.5	8614.98	7831.71	10468.7	10104.5	7974.47	5890.71	10652	7361.2	5530.3	6732.46	9908.81	9249.84	6907.36	358599	8988.37
259	M77T7_2	77.05	77	77.1	6.93236	6.92432	6.99058	6	0	0	0	0	0	0	0	0	0	0	1	0	0	0	0	0	3	0	2		2.94476e-05	4.13758e-06	2361.97	1376.29	3024.68	11702.3	2152.05	3083.82	16456.3	5024.43	3700.69	1435.72	6087.7	2066.06	6900	1912.06	13196.7	10542.4	538594	140945	20557.3
260	M39T16	39	39	39.1	15.9894	15.3052	16.6661	86	4	3	2	3	3	3	4	2	2	2	4	3	1	2	2	1	5	4	4		2.95673e-05	4.1438e-06	15324	10602	7994.06	13569.9	12252.9	11689.9	11367.8	41721	11054.2	6882.78	54408.3	7785.47	8420.26	8104.97	38232.7	21293.5	13082.4	1.42409e+06	33127.6
261	M120T14_1	120.1	120	120.1	14.4319	14.3286	14.7065	31	2	0	2	4	1	0	0	3	3	0	0	1	0	1	2	0	5	2	0		2.96778e-05	4.14953e-06	5064.29	377.088	1984.63	117765	2423.57	160.572	1201.9	32962.6	30674.9	132.4	1948.04	11850.1	169.21	503.057	10352	224.097	339601	16006.2	1377.88
262	M37T16	37	37	37.1	16.0755	16.0643	16.1675	5	0	0	0	0	0	0	0	1	0	0	2	0	0	0	0	0	0	2	0		2.97357e-05	4.15251e-06	528.72	361.991	265.027	452.807	433.854	431.582	370.84	2844.97	391.047	319.27	4730.35	351.215	248.724	282.661	2329.47	668.488	309.773	92570.8	1526.57
263	M74T16	74	74	74.1	16.0794	14.9642	16.447	33	3	0	1	3	0	1	2	1	0	0	4	0	1	1	1	1	4	4	3		3.03464e-05	4.18357e-06	4599.18	3681.44	2537.67	4692.53	4287.02	3987.13	4568.66	15360.4	3100.23	2253.2	21300.1	3482.84	2234.51	3102.05	12358.3	6435	4579.06	465959	9651.69
264	M117T8	117.1	117.1	117.1	8.30877	7.82593	8.57572	39	1	0	0	4	0	0	1	1	1	0	4	1	1	2	0	0	5	4	5		3.05451e-05	4.1935e-06	13631.6	10253	8574.53	83574.6	8741.96	9077.27	12854.7	16313.9	12531.5	8466.49	27476.4	10590	10769.4	12711.2	10640	11600.7	62250.6	293419	72940.7
265	M95T12	95.1	95.1	95.1	11.8296	11.572	12.4227	58	3	1	0	3	0	0	2	3	1	2	5	1	1	0	1	3	5	3	5		3.06833e-05	4.20036e-06	19558.9	4939.87	4234.86	53700	14354.8	3324.33	15300.6	13911.2	3912.49	14855.2	21449.7	5786.77	7986.05	1633.84	8627.2	20306.9	62477.3	18485.5	3.78216e+07
266	M161T15	161.1	161.1	161.2	14.9481	14.7096	15.3177	9	0	0	0	2	1	0	0	0	0	0	1	2	0	0	1	1	1	0	0		3.09054e-05	4.21131e-06	1264.12	480.841	3519.66	342645	9977.56	1084.55	1776.03	22267.8	63482.1	931.829	10651.1	40395.6	947.719	819.899	25887.9	2951.57	57624.6	58563.5	5618.83
267	M204T12_1	204.2	204.2	204.2	12.2353	12.1971	12.5069	14	0	0	0	3	1	0	1	0	0	0	0	1	1	0	1	0	4	1	0		3.10437e-05	4.21807e-06	291.335	0	20.7308	46189.2	4431.86	1436.77	1884.61	3662.69	392.038	4.70412	18.5321	5887.84	741.608	0	2144.97	189.8	13208.8	3134.95	278.31
268	M260T25_2	260.2	260.2	260.2	24.7777	24.7185	24.8011	6	0	1	0	1	0	0	0	1	0	0	1	0	0	0	2	0	0	0	0		3.11031e-05	4.22096e-06	227.902	1985.55	315.07	2656.55	171.801	377.974	218.747	2234.9	2232.92	173.177	3873.79	163.796	216.639	230.878	5869.35	247.751	2718.42	230.762	213.14
269	M98T16_1	98.1	98.1	98.1	16.2831	15.8299	16.2928	35	3	0	0	3	3	0	2	1	0	2	5	3	0	0	0	3	5	4	0		3.11679e-05	4.22411e-06	15595.3	1413.39	3335.18	6296.36	18458.2	1148.16	9013.82	3282.4	2832.79	11240.8	16027.8	5193.76	2083.85	1965.43	2353.96	24165.1	10890.7	485592	3846.24
270	M107T9	107.1	107.1	107.1	9.15901	8.68742	9.59233	58	0	0	1	4	3	0	1	2	4	3	5	2	2	0	3	3	5	3	5		3.1374e-05	4.23407e-06	545.07	530.58	4968.63	129354	61159.3	1086.95	5642.44	11524.2	108429	33926.6	121943	52026.5	9949.35	303.123	33957.9	246517	99581.1	13651.7	37315.2
271	M120T12_1	120.1	120.1	120.1	12.3523	12.1104	12.361	14	0	0	0	2	0	0	0	2	1	0	0	1	0	0	0	0	5	1	0		3.13753e-05	4.23413e-06	188.539	82.5526	124.163	5871.98	742.605	128.181	217.978	2289.49	4272.08	171.292	592.504	7946.4	201.142	74.3202	842.527	447.821	20538	5065.6	368.528
272	M92T14_1	92.1	92	92.1	14.4281	14.1693	14.7065	27	0	0	0	4	0	0	0	1	1	1	0	1	0	1	2	0	5	4	1		3.14414e-05	4.23731e-06	1626.74	428.703	583.561	46012.1	750.522	248.475	1206.16	10354.7	9519.66	1412.44	1459.37	6016.24	175.199	698.848	47514.1	6465.29	122792	36604.7	3636.94
273	M108T15	108.1	108.1	108.1	14.6749	14.1793	15.541	76	4	1	1	4	0	0	2	0	2	2	5	3	0	1	2	3	5	4	5		3.15512e-05	4.24256e-06	16402.5	2644.01	2243.5	198517	3270.39	477.997	8366.14	3948.47	5284.81	6827.93	21152.1	13935.3	292.726	1769.96	46536.8	38304.9	97930.2	198675	42044.7
274	M133T18	133.1	133.1	133.1	18.017	18.0094	18.1913	5	0	0	0	3	0	0	0	0	0	0	1	0	0	0	0	0	1	0	0		3.15593e-05	4.24295e-06	17498	19412.8	15568.4	48906.7	20208.2	18108.9	19056.7	19647.6	18676.2	14194.6	24048.4	15896	14286.6	16375	23933.9	19716.7	23658	14644.7	18441.9
275	M104T36	104.1	104.1	104.1	35.7867	35.07	36.1566	19	0	0	0	0	0	0	0	0	1	0	0	0	0	0	2	0	0	1	3		3.15848e-05	4.24417e-06	45780.4	57177.4	48092	52916	50749.8	50190.5	50934.4	51950.4	67433.9	46441.1	55822.2	41229.9	43563.7	47967.4	53473.4	49468.7	43456.3	43234.8	49467.8
276	M147T15	147.1	147.1	147.1	14.6781	14.4201	15.0877	42	3	0	0	4	0	0	0	2	2	0	4	2	0	0	2	2	5	3	0		3.15934e-05	4.24458e-06	7108.89	957.925	892.428	106353	1360.74	986.15	1240.13	8609.95	6564.2	1176.61	10471.5	5010.18	931.063	876.925	18899.2	4318.74	59561.7	90867.7	2126.44
277	M161T29	161.1	161.1	161.1	28.5503	28.0851	29.0651	24	0	0	0	0	0	0	0	0	0	1	0	3	0	2	0	0	2	1	0		3.18577e-05	4.25711e-06	73177.1	96115.7	76209.8	86495.7	76557.9	80696.4	76850.6	80827.7	84920.3	71825	88726.5	95001.3	65036	70401.7	84810	77220.1	62028.8	70808	63901.3
278	M87T35	87.1	87.1	87.1	35.3219	34.9078	35.6351	17	0	0	0	0	0	0	0	0	0	0	0	0	0	0	0	0	0	0	5		3.20198e-05	4.26473e-06	778005	917999	794737	937321	875608	907243	844745	917091	940841	701411	980970	631437	734143	757017	946295	815213	616635	702809	1.13083e+06
279	M123T15	123.1	123.1	123.1	14.6854	13.8105	15.2503	56	3	0	0	4	0	0	0	2	3	0	5	2	0	0	2	1	5	4	3		3.20955e-05	4.26827e-06	21638	357.359	599.907	233739	4441.2	484.187	1341.63	3646.17	23195.8	571.115	125322	14930.1	994.542	302.416	21217.6	37239.4	35112.7	1.21752e+06	29132
280	M82T14	82.1	82.1	82.1	13.949	13.5864	14.1983	21	0	0	0	4	0	0	0	1	0	0	1	1	0	0	1	0	4	3	1		3.22266e-05	4.27438e-06	3206.87	973.105	1420.1	433893	2999.62	1072.76	2656.47	18033.7	3857.35	1500.76	9894.51	6368.34	4300.87	649.682	42723.2	2873.41	42956.5	33021.9	7488.96
281	M118T28	118.1	118.1	118.1	27.5209	25.8733	28.1309	87	0	1	1	2	0	2	4	2	3	0	4	0	1	0	2	2	1	1	0		3.22501e-05	4.27547e-06	25032.9	31888.5	25303.1	36762.2	27223.3	30029.9	58698.2	35539	38422.1	24825.1	32696.7	22712.7	20190.1	25924.9	40872.6	18768.7	30427.8	25649.2	25665.3
282	M129T13	129.1	129.1	129.1	12.8192	12.7471	13.1158	10	0	0	0	4	0	0	0	0	0	0	0	0	0	0	0	0	4	0	2		3.25378e-05	4.29341e-06	1005.03	2450.21	1010.58	66373	1110.33	1437.86	1692.8	1753.97	1591.15	501.178	1818.07	895.161	1099.97	836.175	1671.89	1879.1	37785.7	1077.36	5253.3
283	M112T25_2	112	112	112.1	25.3762	25.2866	25.5116	8	0	2	0	1	0	0	0	1	1	0	2	0	0	0	0	0	0	0	1		3.28431e-05	4.31226e-06	5265.17	21003.8	9323.45	19812.1	6383.72	7061.93	6941.21	14105.3	14020.2	6112.22	17895.6	5098.21	5234.9	5963	18503	6330.09	6352.37	4394.28	5606.23
284	M92T16	92.1	92.1	92.1	16.4505	15.8299	16.4661	29	3	0	0	0	0	1	0	1	0	2	4	1	1	0	1	0	0	4	5		3.29029e-05	4.31594e-06	59589.9	208.691	2579.56	4513.92	1403.35	1995.46	2587.45	13576.7	1386.81	17583.3	29825.9	4461.19	39975.6	1203.14	12646.3	2118.93	6325.63	335993	485336
285	M40T7_1	40	40	40.1	7.45087	7.43568	7.61443	8	0	0	0	0	0	0	2	0	0	0	0	0	1	0	0	0	3	1	1		3.34521e-05	4.35057e-06	7255.31	10115.2	9157.74	11332.4	8552.91	10429.9	27125.8	7929.98	10459.6	7657.47	12957.1	7892.39	11800	11398.1	12869.7	9295.28	194580	16099.1	43582.9
286	M89T6	89.1	89.1	89.1	6.20987	5.94637	6.24633	6	0	0	0	0	0	0	0	0	0	0	0	0	1	0	0	0	4	0	1		3.39017e-05	4.37849e-06	43147.9	52945.5	42701	55325.3	44295.4	50390.6	55125.7	50960.2	45783.9	42223.1	54241	41065	62995.1	39722.1	56142.2	46926.6	151528	37942.8	111856
287	M189T14	189.2	189.2	189.2	13.9687	13.8902	14.2069	10	0	0	0	4	0	0	0	0	0	0	1	0	0	0	3	0	1	0	0		3.39071e-05	4.37883e-06	98.3492	18.8068	183.057	210103	499.196	68.4869	242.577	839.022	1146.24	15.4222	3283.93	328.019	216.758	37.6224	253722	89.5267	40128.7	308.97	623.572
288	M242T25	242.2	242.1	242.2	24.7872	24.7177	25.3743	11	0	2	0	1	0	0	0	1	2	0	3	0	0	0	2	0	0	0	0		3.4136e-05	4.3929e-06	271.542	2515.47	357.262	4865.35	275.72	421.621	313.792	4123.92	4707.66	179.653	6532.81	175.979	85.6311	256.73	9994.97	231.654	2832.11	226.627	228.955
289	M105T14	105.05	105	105.1	13.6533	13.599	13.9812	36	2	0	1	4	1	0	2	0	2	1	1	2	3	1	3	1	3	2	4		3.4261e-05	4.40053e-06	11692.3	7181.16	6507.37	551782	12023.2	5891.86	9930.18	11052.9	15983.1	6380.98	495491	7128.45	7329.01	5569.76	1.32626e+06	14812	44964.9	18294.9	1.11678e+06
290	M104T34	104.1	104.1	104.1	33.9873	33.5374	34.5767	18	0	0	0	1	0	0	0	1	0	0	0	0	0	0	1	0	0	0	4		3.46474e-05	4.42396e-06	25592.8	33794.7	26713.4	32670.8	29165.1	30209.4	27498.2	46247.3	31421.2	25817.6	31774.8	23485.5	23447	27087	34261.7	29093.4	24564.8	23301.1	43207
291	M204T13	204.2	204.2	204.2	13.0974	12.8044	13.4005	31	0	0	1	4	2	0	0	2	2	0	1	2	0	0	2	1	5	2	0		3.48477e-05	4.436e-06	643.987	14.4508	4133.2	690216	16339.4	123.042	482.615	9615.52	8913.56	13.4776	4941.45	7858.62	1809.12	3.42667	10551.9	1880.37	76332.7	1950.68	142.976
292	M98T10_1	98.1	98.1	98.1	10.4057	10.1007	10.8996	69	4	2	2	3	3	3	4	3	2	3	5	4	2	3	2	3	5	4	4		3.55985e-05	4.48047e-06	27087.7	11091.6	12656	13893.1	27167.2	7658.13	31004.4	26827.5	7848.53	28519.3	53322.9	12349.1	12462.9	7870.35	19522	32646.5	25846.3	10054.3	121347
293	M97T13	97.1	97	97.1	12.7698	12.3433	13.1928	85	4	3	3	4	3	4	3	3	4	3	5	4	3	4	3	3	5	4	2		3.56835e-05	4.48544e-06	22447.8	23287.3	24297.6	26892.6	25887	23190.5	23688.6	23300.1	20402.8	20767.4	30416.6	19961.9	20866.6	19787.5	32691.6	29026.7	78167.4	20285.1	2.14714e+06
294	M92T7_1	92.1	92	92.1	7.4585	7.43187	7.86503	35	0	0	1	2	0	1	3	0	1	0	3	0	1	0	1	1	5	2	5		3.58038e-05	4.49246e-06	4822.31	5471.79	10619.9	13457.7	6002.33	8281.14	121202	4598.75	7328.54	6491.37	18263.9	7965.82	21239.3	7055.68	16022.8	10085.1	2.0617e+06	38850.8	376890
295	M153T19	153.1	153.1	153.1	19.0729	18.9195	19.0831	14	0	0	2	0	0	0	0	0	0	0	0	3	0	1	2	0	3	2	0		3.6086e-05	4.50882e-06	1384.94	752.036	5013.22	902.178	1493.9	525.909	1027.91	624.925	573.366	1296.88	981.792	9412.64	1568	2515.8	10719.7	1004.46	17657.4	6545.73	1009.47
296	M150T16	150.1	150.1	150.1	15.8543	15.7017	16.3022	11	1	0	0	1	0	0	0	0	0	0	0	0	1	0	0	2	3	2	1		3.67549e-05	4.54704e-06	815.511	74.0982	134.598	573.884	308.313	85.1576	357.616	215.829	152.577	186.902	778.436	128.384	520.261	70.8243	527.305	1657.08	3654.38	2625.13	1509.08
297	M109T14	109.1	109.1	109.1	13.9532	13.4959	14.1806	42	3	0	1	4	1	0	2	2	2	0	1	2	0	0	3	0	5	3	4		3.69463e-05	4.55784e-06	4407.69	430.393	2580.11	568775	3964.97	589.05	7183.36	5548.98	5058.37	833.932	10946.1	7412.79	3055.98	514.999	52955.8	1949.18	178542	14381.3	36298.1
298	M67T14	67.1	67	67.1	13.8951	13.5245	14.1085	13	0	0	0	4	0	0	0	0	0	1	2	0	0	1	1	0	1	0	1		3.72664e-05	4.57577e-06	1672.42	748.205	1241.95	1.24267e+06	1809.49	653.655	2510.48	10713.2	3134.39	3864.2	21094.8	7412.35	4215.9	1374.5	46604.7	1662.6	47636.6	24607.7	34582.9
299	M102T9	102.1	102.1	102.1	8.99666	8.7472	9.08257	6	0	0	0	0	0	0	0	0	0	0	0	0	0	0	0	0	1	0	5		3.746e-05	4.58652e-06	1334.28	2004.01	1055.26	2358.87	2106.87	1809.06	1947.74	1516.52	1681.91	967.855	2207.88	1072.6	878.545	1181.46	2298.58	2182.76	3725.84	1322.15	143010
300	M105T12	105.1	105	105.1	12.0452	11.0897	12.3604	53	2	0	0	4	0	0	1	2	3	0	3	2	0	3	1	1	5	3	3		3.76626e-05	4.59772e-06	27287	4079.22	5766.1	42680	2892.61	4006.86	11534.4	17547	19257.6	13385.6	650324	16673.8	3854.23	12960.7	206564	7943.35	67551.6	22494.7	107264
301	M51T8_1	51	51	51.1	8.30537	7.9509	8.7472	57	3	1	0	3	0	0	1	3	3	0	5	1	1	2	2	2	5	4	3		3.78027e-05	4.60543e-06	59639	49124.8	37234.5	232203	39339.2	42834	44067.9	80352.5	55345.9	35734.7	464413	47218.7	38363	59635.3	53883.5	51670.9	78257	969230	89491.8
302	M204T14	204.2	204.2	204.2	13.8992	13.5165	14.0144	28	0	0	1	4	1	0	0	1	1	0	1	2	1	0	3	0	4	2	2		3.79182e-05	4.61175e-06	156.253	4.66242	847.733	438796	1591.55	102.628	463.741	4146.99	4702.06	9.56564	3823.03	3044.39	1302.93	3.88843	527532	311.87	37929	3447.9	2199.39
303	M72T36	72.1	72.1	72.1	36.0804	35.5767	36.6218	157	2	0	3	0	0	1	3	1	0	2	2	2	1	2	1	1	5	1	1		3.86926e-05	4.65363e-06	450085	520238	532891	503851	442699	438493	267031	469467	507802	486474	515145	279956	334527	355647	516157	441362	381438	368495	371864
304	M63T8_1	63	63	63.1	8.3086	8.18287	8.75102	26	3	0	0	1	0	0	1	1	0	1	3	1	1	2	1	1	5	2	0		3.91195e-05	4.67632e-06	9016.09	946.191	777.637	75773.3	928.724	1276.28	2267.44	14096.3	4694.13	1377.05	124627	5387.17	2217.59	8384.79	2831.63	4499.67	26367.2	233581	1529.98
305	M148T15	148.1	148.1	148.1	14.6782	14.2985	15.0839	19	2	0	0	2	0	0	0	1	2	0	4	1	0	0	2	0	1	3	0		3.98915e-05	4.71666e-06	3804.46	208.449	146.625	41941.8	745.872	237.147	401.802	1593.66	3819.43	271.408	4527.72	1203.84	164.457	177.894	7675.65	500.026	9732.79	33547.5	521.623
306	M50T8	50	50	50.1	8.30479	7.83067	8.74722	40	3	0	0	2	0	0	0	2	2	0	5	1	1	3	0	2	5	3	3		4.00106e-05	4.72281e-06	10386.9	5265.55	4002.95	65519.6	4619.53	4807.77	5253.38	14529.5	8588.05	3896.42	179364	6649.23	5883.95	10888.9	6864.38	8370.64	17516	164781	31078.9
307	M39T7_1	39	39	39	7.45488	7.15015	7.82197	46	1	1	4	3	3	2	4	1	0	0	3	4	2	1	1	2	3	2	5		4.00504e-05	4.72486e-06	9051.54	11492.4	14786.9	15470.8	11209.5	16117.4	56174.1	12128.5	12344.4	12453.7	16200.5	10643.6	20175.8	19358	19325.9	11491.7	466230	48348.5	229910
308	M94T7_1	94.1	94.1	94.1	7.45761	7.43272	7.62538	54	0	0	3	4	1	1	4	2	0	2	3	3	2	1	1	1	5	4	5		4.02598e-05	4.7356e-06	6959.47	8538.97	16478.6	19570.3	10249.8	12728.3	151907	8238.31	8759.59	9668.11	24483.8	12943.4	32495	11602.6	18687.9	15563.4	2.63679e+06	55941.5	470911
309	M131T13	131.1	131.1	131.1	13.091	12.8044	13.1158	17	0	0	1	4	2	0	0	1	1	0	1	1	0	0	0	0	5	0	0		4.04261e-05	4.74409e-06	1710.27	1351.54	2417.24	210920	7516.98	1178.51	1389.73	4884.81	4220.29	940.843	3633.29	4100.63	1822.73	1159.17	3015.32	2296.95	56804.1	1083.28	2824.98
310	M137T15	137.1	137.1	137.2	14.6754	14.459	14.8895	11	2	0	0	1	0	0	0	1	0	0	0	0	0	0	1	0	1	4	1		4.04832e-05	4.74699e-06	2281.89	180.457	582.889	35276.8	853.691	224.669	734.819	1168.69	480.844	2450.68	1608.55	433.618	216.318	265.523	5426.78	739.571	3458.45	188779	3541.75
311	M51T24	51	51	51	24.3126	24.3084	24.3172	4	0	0	0	0	0	0	0	0	0	0	0	0	0	0	0	0	0	4	0		4.05022e-05	4.74796e-06	2685.77	3571.69	2689.34	3397.04	3116.61	2954.61	2980.26	3396.06	3235.76	2510.87	3701.78	2176.82	1990.27	3040.53	3558.81	3097.55	3233.34	76432.7	1582.31
312	M121T9_2	121.1	121.1	121.1	8.74354	8.71302	8.7613	26	0	0	0	2	0	2	3	0	1	0	1	0	1	0	2	1	5	3	5		4.0779e-05	4.76197e-06	994.939	709.268	1445.84	4803.9	1089.76	3952.61	11250.1	1855.27	2306.36	741.686	2849.78	977.998	15214.4	913.841	7862.38	4164.42	664433	48399.6	267578
313	M122T21	122.1	122	122.1	20.8046	20.2808	21.5541	15	0	1	0	3	0	0	0	0	0	0	0	0	0	0	0	0	3	4	0		4.08168e-05	4.76387e-06	702.136	1033.15	233.976	6413.42	435.147	397.347	363.337	642.116	499.475	527.609	694.962	972.12	426.597	434.162	1031.57	359.333	24592	125376	594.052
314	M108T8	108.1	108.1	108.1	8.30695	8.1753	8.71037	26	2	0	0	4	0	0	0	1	2	0	4	1	0	2	0	0	3	4	1		4.13364e-05	4.78985e-06	6618.9	176.912	181	100323	181.27	260.745	465.604	10139.5	4171.24	347.239	21950.2	4027.16	398.568	5331.07	226.514	2442.99	13661.5	396625	1513.06
315	M161T34	161.1	161.1	161.1	33.5717	32.8472	34.2045	55	1	0	1	1	0	0	1	0	0	1	0	2	1	2	0	0	4	1	0		4.13903e-05	4.79253e-06	140825	127029	96650.9	130825	104318	112755	116565	111959	120641	106297	119146	84320.6	80793.7	74938.8	116436	108161	83373.9	92415.3	83095.7
316	M206T33	206.1	206.1	206.1	32.7786	32.6532	33.0874	15	0	1	1	2	1	2	0	0	0	0	2	0	0	1	1	3	1	0	0		4.15384e-05	4.79985e-06	8822.19	23178.2	9882.97	13917.4	11387.5	11672.6	9514.86	9984.8	12080.8	9287.94	15280.3	7480.7	4702.53	9013.37	15587.4	13780.2	10324.9	8009.45	2282.82
317	M103T7_1	103.1	103.1	103.1	7.46705	7.44262	7.8609	16	0	0	0	0	0	0	0	0	0	0	0	0	1	0	1	0	5	0	5		4.18451e-05	4.81493e-06	11147.6	14532.5	12512.6	15828.2	14903.9	13867.9	21490.7	13122	13280.7	9893.57	15529.7	11041.5	29797.5	12224.5	24151.9	13329.4	130328	12090.1	319046
318	M55T10_2	55.1	55	55.1	10.3922	10.1007	10.8174	27	0	1	0	2	0	0	2	1	0	2	3	0	1	0	0	2	3	4	1		4.22917e-05	4.83666e-06	28688.4	11979.4	12927.8	87916.2	26280	12894.9	33433.1	31592.3	9218.99	31085.2	90032.1	12032	19265	11707.1	23356.4	39360.5	62653.4	113134	508394
319	M94T14	94.1	94.1	94.1	13.9534	13.5864	14.2021	25	0	0	0	4	0	0	0	1	1	0	1	1	0	0	2	0	5	3	1		4.24122e-05	4.84247e-06	1142.55	196.083	1410.08	604488	2603.84	256.527	1413.89	5794.04	4462.73	559.853	9059.65	4040.3	3068.23	297.88	22648.8	560.774	102814	24956.5	44972.6
320	M83T8	83.1	83	83.1	8.24232	7.83773	8.54105	18	1	0	0	0	0	0	0	0	1	0	5	0	0	0	0	0	1	3	5		4.25228e-05	4.8478e-06	11623.6	4376.49	3366.17	10098.4	4390.58	6532.49	11306.7	4679.26	7395.74	2741.84	355430	3690.56	14974.6	3158.3	14219.6	8711.38	35410.2	23448.2	4.90175e+06
321	M39T10	39	39	39	10.3999	9.98748	10.7364	62	4	2	3	3	3	2	3	3	2	1	3	2	2	2	1	1	5	4	4		4.26943e-05	4.85602e-06	22290.1	8597.32	7931.44	43473	14808.4	10759.2	16379.5	15374.1	9486.47	13387.2	31329.8	7859.44	10115.1	9601.82	12162.5	16114.9	26662	60268.1	95271
322	M99T12	99.1	99.1	99.1	11.8938	11.5858	12.0343	27	2	0	0	4	1	0	1	0	0	0	2	2	0	1	1	2	3	1	5		4.32072e-05	4.88038e-06	19470.4	4708.99	3945.19	16891.3	15405.6	3515.61	13049	12174.3	7051.93	6177.32	22307.4	9252.31	3772.72	8266.68	18699.5	17953.2	11113.4	8008.74	264290
323	M88T12	88	88	88	11.6031	11.5983	11.6101	4	0	0	0	0	0	0	0	0	0	0	0	0	0	0	0	0	4	0	0		4.3228e-05	4.88136e-06	11505.9	13509.7	11331.6	13223.7	12120.8	12388.6	12415.1	12424.8	12252.7	10703.2	13678.1	9857.33	10110.9	11059.2	12025.9	11665.8	18635.3	11003.9	14063.5
324	M119T17_2	119.1	119.1	119.1	17.4281	17.4055	17.7024	11	0	0	0	4	1	0	0	0	0	0	0	0	0	0	0	0	1	2	3		4.32599e-05	4.88286e-06	2372.34	1283.12	1222.84	69734.3	5774.14	948.663	2278.06	1973.82	1931.65	1529.24	4649.86	1599.05	1087.8	1140.66	4047.16	3949.97	12054.9	7432.26	17825.6
325	M41T7_2	41	41	41.1	7.47383	7.4428	7.85592	13	0	1	1	0	0	1	1	0	1	1	0	1	1	0	0	0	3	0	1		4.3325e-05	4.88593e-06	34882.6	42947.2	35229.1	39724.5	33037.3	40500	74857.8	36461.4	46746	33644	48256.5	35690.5	66795.1	65767	51426.6	42637.5	470411	103256	278254
326	M117T15	117.1	117.1	117.1	14.7065	14.4166	15.2364	31	1	0	0	4	0	0	0	2	1	0	1	1	0	0	0	1	5	4	2		4.33796e-05	4.88849e-06	6208.65	4348.29	3644.68	58049	4428.89	3844.15	4217.52	12184.6	10120.2	3907.88	8693.68	7298.8	3441.47	3583.83	11337.2	6093.11	97296.4	68153.1	10666.5
327	M83T13	83.1	83.1	83.1	12.7698	12.3433	13.1892	101	4	3	4	4	3	4	4	3	4	3	5	4	3	4	3	3	5	4	5		4.3435e-05	4.89109e-06	53659.7	56555.7	58665.6	65021.2	59517.6	56409.5	56308.7	57271.4	49260.2	50591.9	73942.5	48419.2	47053.9	48021.2	76312.6	66144.7	78567.6	47821.2	140966
328	M122T18	122.1	122.1	122.1	18.3544	17.8378	18.7139	13	0	0	0	3	2	0	0	0	0	0	1	0	0	0	2	0	1	2	0		4.35242e-05	4.89527e-06	591.485	326.69	308.859	24627.5	7318.07	241.741	418.124	364.014	760.923	271.371	1331.05	353.349	134.777	235.747	7378.76	561.049	2214.7	4541.05	516.352
329	M125T14	125.1	125.1	125.1	13.8951	13.4345	14.2411	11	0	0	0	1	0	0	2	0	0	0	3	0	1	0	0	0	0	0	3		4.40232e-05	4.91845e-06	615.793	375.769	422.479	1588.91	1077.23	249.879	9895.75	525.625	398	298.576	9535.9	496.632	1293.18	234.406	679.975	919.688	819.768	369.56	121657
330	M55T25	55.1	55.1	55.1	24.7834	24.7185	25.26	12	0	1	0	1	0	0	0	1	2	0	3	0	0	0	3	0	0	0	1		4.44717e-05	4.93902e-06	16607.5	62313.5	13152.9	80810.6	17952.4	14418.3	16937.5	58893.1	73465.4	12198.8	109624	10574.9	8502	13577	146744	23983.2	21697.7	13857.5	21210.2
331	M82T16_1	82.1	82	82.1	16.0051	15.8236	16.3908	16	2	0	0	0	1	0	1	0	0	0	1	0	0	0	0	0	1	4	2		4.45887e-05	4.94435e-06	8905.79	729.891	1537.83	2682.21	4479.82	731.007	4946.34	4366.4	1133.4	1784.41	12063.2	2502.51	972.496	770.906	1992.48	3855.65	8363.28	398834	18103.6
332	M205T19	205.2	205.2	205.2	18.7128	18.6984	18.7176	5	0	0	0	3	0	0	0	0	0	0	0	0	0	0	2	0	0	0	0		4.46545e-05	4.94734e-06	2135.99	99.3406	237.728	57585.1	218.344	71.7922	163.322	175.997	198.889	104.985	489.965	79.924	51.7717	82.9435	25531.7	276.968	1538.86	50.1032	119.411
333	M137T26	137.1	137.1	137.1	25.9531	25.6265	25.9767	4	0	0	0	0	0	0	0	0	0	0	0	0	0	0	0	0	3	0	0		4.46808e-05	4.94853e-06	3382.98	4661.3	2617.41	4128.99	3878.04	3065.58	2866.74	3115	4238.95	3269.89	5024.95	2572.71	2021.12	3085.53	4351.91	3560.06	17333.4	2455.83	2648.25
334	M112T11_2	112.1	112.1	112.1	11.0665	11.0398	11.1983	7	1	0	0	0	0	0	0	0	0	0	0	0	0	0	1	0	0	0	5		4.47557e-05	4.95193e-06	4488.7	816.897	583.26	1725.2	995.334	857.904	1919.06	4247.76	1314.09	653.575	5069.84	735.752	1821.53	490.031	4854.66	2393.7	2100.37	623.711	715073
335	M212T25	212.2	212.2	212.2	24.7796	24.7185	24.7926	8	0	0	0	1	0	0	0	1	1	0	3	0	0	0	2	0	0	0	0		4.48831e-05	4.95768e-06	422.114	4440.65	366.756	6147.91	305.703	471.312	335.36	4777.91	5329.65	318.284	8974.53	306.033	266.046	273.257	11878.5	280.989	636.593	228.329	365.085
336	M207T39	207.1	207.1	207.1	39.1377	38.6371	39.9849	20	0	0	0	0	0	0	0	0	0	0	0	0	0	0	0	0	0	0	3		4.51673e-05	4.97045e-06	15091.8	20626.1	15073.7	18578.5	16757.7	17473.1	15995.9	17873.4	19410.4	16474.5	18449.5	14333.7	14554.2	15330.8	17476.8	15808.5	15847.6	14675.7	37935.3
337	M95T7_1	95.1	95.1	95.1	7.45672	7.34902	7.84193	35	0	0	1	2	0	2	2	0	0	0	3	2	1	1	1	1	5	3	5		4.53146e-05	4.97704e-06	2206.72	2760.54	4713.89	5846.22	2861.16	5643.11	48225	1913.3	2558.22	2514.84	8079.74	3930.69	16665.7	3724.53	8046.3	6849.91	816386	72282.3	147719
338	M131T14_1	131.1	131.1	131.1	14.4281	14.409	14.7065	16	0	0	0	3	0	0	0	2	2	0	0	0	0	0	0	0	5	1	0		4.53438e-05	4.97834e-06	1881.98	1256.3	1212.31	30367.2	1913.99	1119.05	1753.77	6622.74	6664.04	1331.97	2598.69	2540.84	905.445	1099.96	3916.72	2153.56	55041.5	2773.52	2856.68
339	M95T15	95.1	95.1	95.1	15.4951	15.2363	15.8299	18	0	0	0	0	0	0	1	0	0	1	4	1	0	0	0	0	4	4	2		4.53912e-05	4.98045e-06	2670.91	702.563	1677.81	3658.13	3182.65	699.59	4041.84	2746.62	1627.5	8494.36	152819	6703.64	1846.46	1572.63	1702.15	2701.37	50441.8	204873	16516.8
340	M97T16_1	97.1	97.1	97.1	16.2744	15.8299	16.7309	14	1	0	0	0	1	0	1	0	0	0	1	0	0	0	0	1	1	4	1		4.55765e-05	4.98868e-06	8264.86	1725.29	2433.42	4535.1	9405.74	1807.15	5973.17	2255.72	3019.44	4071.41	10293.6	3226.86	2060.76	1466.11	3312.38	11886.5	6172.12	397758	13286.6
341	M69T12	69.1	69.1	69.1	11.7858	11.3222	12.0376	42	4	1	1	3	1	0	1	1	1	2	0	0	1	0	0	3	5	4	5		4.60004e-05	5.00735e-06	36577.3	8316.39	10484	34103.1	27342.6	6032.93	28344.6	20333.6	11847.2	21023.7	37525.5	9532.36	12663.1	3855.67	23181.6	33394.3	76394.1	58256.5	2.07984e+06
342	M110T9	110.1	110.1	110.1	8.88873	8.8227	8.8959	5	0	0	0	0	0	0	2	0	0	0	2	0	0	0	0	0	0	0	1		4.63455e-05	5.0224e-06	1418.24	512.757	387.559	505.966	833.314	465.372	1840.67	1184.89	416.337	1023.99	4703.56	609.727	1984.93	267.049	1021.89	1533.65	4602.26	264.264	3050.95
343	M69T14	69.1	69	69.1	13.8783	13.4972	14.1701	44	2	0	0	4	0	0	1	1	1	1	2	2	1	0	3	0	4	4	3		4.65122e-05	5.02962e-06	9092.6	2587.87	3978.34	6.1033e+06	8424.77	2561.47	12043.4	12880	13635.5	5770.91	39100.1	48823.4	7746.17	2808.72	255222	11167.1	66764.2	128807	36159.6
344	M65T8	65.1	65	65.1	8.31742	8.24325	8.55607	12	0	0	0	3	0	1	0	0	0	0	2	0	0	0	0	0	1	4	0		4.66782e-05	5.03678e-06	18807	243.852	206.314	413455	406.235	1488.89	1616.45	35499.7	10278.8	755.511	98710	11027.4	602.159	14213.8	439.951	6959.4	32044	1.53926e+06	1425.78
345	M53T16	53	53	53.1	15.9894	15.496	16.1675	38	0	1	0	0	2	2	1	1	1	0	0	3	0	1	2	3	3	4	2		4.67965e-05	5.04187e-06	10268.1	2771.28	2449.34	3906.29	6269.17	3512.69	5080.95	20961.9	2387.08	3715.97	12770.9	5753.6	2535.66	2061.56	16727.8	8629.53	10527.6	1.69394e+06	14656.6
346	M68T7	68.1	68.1	68.1	7.45146	6.72182	7.62038	80	2	2	3	4	3	3	4	3	2	2	5	4	3	4	3	3	5	4	5		4.6861e-05	5.04464e-06	25939.1	32154	50007.9	61777.1	30963.1	39874.9	458132	24867.2	31905.1	32445.9	78632.5	43213.6	92655.5	41261.9	61685.9	49465.3	6.99908e+06	169422	1.3617e+06
347	M67T18	67.1	67.1	67.1	18.4224	18.0132	18.7307	7	0	0	0	2	0	0	0	0	0	0	0	0	0	0	0	0	0	4	0		4.7179e-05	5.0582e-06	1294.36	884.393	743.7	47147.8	1721.28	594.044	905.803	1142.91	1103.68	696.483	2016.36	851.048	562.447	704.535	2745.94	1452.94	1465.11	244952	2623.3
348	M108T7_1	108.1	108.1	108.1	7.46375	7.43498	7.6499	29	0	1	0	0	0	0	3	0	1	0	1	0	1	2	0	1	5	4	5		4.7431e-05	5.06888e-06	1372.27	1752.48	2679.66	3080.59	1592.91	2318.39	29269.6	1084.89	1959.02	1513.97	4271.85	2411.55	5873.18	3477.09	4460.3	4314.11	531555	226869	95285.5
349	M75T16_2	75	75	75.1	15.7016	15.541	15.7061	9	0	0	0	1	3	1	0	0	0	0	1	0	0	0	2	0	1	0	0		4.777e-05	5.08313e-06	4631.42	5676.61	4685.98	6764.71	7175.31	5739.09	5879.67	5702.85	5706.15	3715.47	15017.9	4438.84	3942.95	5522.27	6618.77	6641.52	5805.03	3532.93	4357.42
350	M84T12_2	84	84	84.1	12.3299	12.1266	12.6679	5	0	0	0	0	0	0	0	0	0	2	0	0	0	0	0	0	0	0	2		4.78564e-05	5.08674e-06	64714.9	70660.6	57865.9	70059.4	64938.8	64663.4	68320.8	78574.6	65503.3	84635.8	80008.4	48171.6	51431.9	53108.1	68841.3	69680.2	59353.3	56646.5	150545
351	M88T8	88.1	88	88.1	8.0712	8.03647	8.28932	5	0	0	0	0	0	0	0	0	0	0	0	1	0	0	0	0	0	1	3		4.79741e-05	5.09165e-06	138.642	0	0	296.223	0	0	0	0	0	0	99.8384	15729.6	0	0	0	0	155.733	2990.62	294087
352	M119T12_2	119.1	119.1	119.1	12.352	12.1135	12.5069	23	0	0	0	4	1	0	0	0	2	0	4	1	0	0	1	1	5	3	0		4.84331e-05	5.11145e-06	1505.44	523.732	1820.69	32310.7	6077.12	712.287	606.324	2075.43	9070.59	745.03	7737.57	9237.73	798.77	459.884	6237.5	3465.36	35747	23226.6	1891.89
353	M78T23	78.05	78	78.1	23.088	23.0791	23.0969	2	0	0	0	0	0	0	0	0	0	0	0	0	0	0	0	0	0	2	0		4.94307e-05	5.15372e-06	1691.6	1149.33	1266.85	1675.92	1927.19	1910.04	2161.54	1775.81	1266.12	1053.78	2387.03	1330.96	1153.76	1432.46	2350.43	2708.22	4114.13	44922.7	754.975
354	M161T27	161.1	161.1	161.1	27.3836	26.9642	28.0318	32	1	1	2	0	0	0	0	2	0	0	0	3	1	0	0	0	3	0	0		4.95068e-05	5.1569e-06	65011.9	94042.6	53216.3	77556.6	68113	69917.8	71560.6	94799.7	74622.2	65115.2	76646.1	55484.5	56404.9	65777.8	71509.7	68638	76065.4	56768.1	52573.3
355	M109T12_1	109.1	109.1	109.1	11.824	11.0398	12.1354	44	4	0	1	3	1	1	1	2	1	2	2	0	1	0	1	3	5	0	4		5.04053e-05	5.19404e-06	9192.4	2461.77	2155.44	34285.6	6959.39	1589.57	7339.91	7038.52	2836.63	7144.49	13183.5	2414.72	3449.36	764.411	9051.94	10048.4	48063.6	1554.28	37578.2
356	M129T19	129.1	129.1	129.1	18.9675	18.8686	19.0105	8	1	0	0	0	0	0	0	0	0	0	0	0	0	3	2	0	0	2	0		5.04767e-05	5.19696e-06	4777.09	1033.62	1582.5	1988.91	967.507	1078.63	1080.77	911.177	1017.01	1765.91	1008.18	2407.11	1064.78	14545.3	44191.9	980.279	6666.86	7255.59	696.963
357	M44T16	44.05	44	44.1	15.9946	15.9539	16.0087	6	0	0	0	0	0	0	1	0	0	0	0	0	0	0	0	0	1	3	1		5.04956e-05	5.19773e-06	28241	32551	25505.2	30341	28461.7	28734.8	31096.7	29392.3	28786	24400.9	32771.5	23573.4	22540.9	24736.8	30621.1	28770.7	27028.1	111556	18351.8
358	M92T21	92.1	92	92.1	20.8721	20.7641	21.2641	7	0	0	0	2	0	0	1	0	0	0	0	0	0	0	0	0	1	3	0		5.0499e-05	5.19787e-06	865.135	1025.06	696.62	11145.1	1475.37	760.219	984.091	754.743	990.701	418.418	2473.09	647.003	704.522	828.873	1677.85	1033.61	6375.68	53347.8	1209.7
359	M192T27	192.1	192.1	192.1	27.4446	27.4408	27.4485	2	0	0	0	0	0	0	0	0	0	0	0	0	0	0	0	0	0	2	0		5.08615e-05	5.21259e-06	2543.13	3904.45	2829.51	3544.99	3235.35	3257.05	2997.84	3170.37	3806.35	2861.13	3823.61	2521.09	2316.81	2724.75	3497.83	3307.13	2597.79	12650.3	2827.72
360	M107T7	107.1	107.1	107.1	7.45321	6.92775	7.62617	74	0	1	4	3	2	3	4	2	3	1	4	3	2	4	2	1	5	4	5		5.14433e-05	5.23596e-06	6145.31	7783.99	12783.5	14589.5	7919.81	9608.18	114802	5516.99	8559.45	7351.67	18676.6	10271.7	26049.9	10127.3	14673.1	13217.5	2.11201e+06	44511.5	380946
361	M157T25_1	157	157	157.1	25.3648	25.2904	25.8733	8	0	1	0	3	0	0	0	1	0	0	1	0	0	0	1	0	1	0	0		5.15403e-05	5.23982e-06	3258.69	31580.6	6888.47	40051.6	2568.33	4939.43	3746.72	21373.9	17140.9	2439.16	23254.6	3564.93	1722.68	3653.37	32636.7	2886.93	9117.13	2653.95	1571.97
362	M67T7_1	67.1	67	67.1	7.45277	7.43272	7.61657	47	1	1	3	3	1	1	3	1	0	2	4	3	2	2	2	1	5	4	5		5.1561e-05	5.24065e-06	17620.1	20059.6	34812.5	41704.7	22061.1	27790.5	318522	14909.1	21329.8	20031.8	54608.5	27312.2	67855.4	26207	43296.6	35025.2	4.92527e+06	114355	945580
363	M205T12	205.2	205.2	205.2	12.3007	12.2347	12.358	4	0	0	0	2	0	0	0	0	0	0	0	1	0	0	0	0	1	0	0		5.17279e-05	5.24727e-06	15.7307	3.98161	3.84534	6286.99	34.1201	23.2025	44.5226	71.5676	188.842	0	26.8324	1037.95	21.7591	22.3727	95.5558	5.58979	2088.08	428.556	148.278
364	M66T7_1	66.1	66	66.1	7.4509	7.43133	7.86503	9	0	0	0	0	0	0	0	0	0	0	0	0	1	0	0	0	4	0	3		5.18435e-05	5.25185e-06	383.239	417.88	678.346	1054.58	539.493	575.001	11535.5	449.734	529.848	322.21	1319.62	617.462	2054.25	520.232	1684.5	812.3	205912	2954.75	36373.2
365	M77T8	77.1	77	77.1	8.30463	7.99303	8.74763	27	0	1	1	4	1	0	0	2	0	0	5	2	2	0	0	2	0	4	1		5.25962e-05	5.28133e-06	97175.6	2668.87	3458.19	2.15701e+06	3657.33	6423.08	10780.4	238778	82567.6	6720.57	954467	64145.5	4430.29	97943.3	5600.74	26987.2	169139	7.85396e+06	24443.7
366	M189T13	189.2	189.1	189.2	13.0973	12.8044	13.5245	25	0	0	1	4	2	0	0	2	1	0	1	2	1	0	2	0	5	0	1		5.32208e-05	5.30541e-06	1537.65	48.0086	10095.2	1.57639e+06	39545.9	494.334	187.781	20804.3	15769.2	21.8445	11809.4	18276.4	4170.79	34.3673	15435.1	3922.08	570044	1005.32	1377.2
367	M69T10_2	69.1	69.1	69.1	10.402	10.0894	10.8174	70	4	1	2	3	2	2	3	3	2	3	5	2	1	1	2	3	5	4	5		5.3376e-05	5.31134e-06	27666.8	9822.59	11257.4	63130.1	23126.6	9822.02	30035.9	27004.8	9409.02	27317.9	69414.3	12096	18405.9	16369.8	18298.4	34772.6	53372.6	88680.7	401901
368	M69T15_1	69.1	69.1	69.1	15.4962	15.1746	15.5885	50	3	0	2	4	2	0	2	3	2	3	5	3	0	0	1	2	5	4	4		5.35202e-05	5.31682e-06	19407	1962.11	14089.8	25100.1	16144.8	2304.45	17507.2	25081.8	14171.5	87229.6	318823	71172.5	4138.37	2194	10040	14316.1	72330.1	3.99083e+06	23215.6
369	M67T17	67.1	67.1	67.1	17.4079	17.4017	17.4635	6	0	0	0	4	0	0	0	0	0	0	0	0	0	0	0	0	0	0	2		5.3626e-05	5.32084e-06	2504.8	925.085	1256.63	114595	2839.95	1013.16	2926.48	2207.07	1638.46	1109.02	4724.8	1425.79	1116.28	1086.2	2160.05	3798.31	9951.27	6708.94	28756.8
370	M42T18	42	42	42.1	18.4296	18.4262	18.4731	3	0	0	0	0	0	0	0	0	0	0	0	0	0	0	0	0	0	2	0		5.37149e-05	5.32421e-06	8946.48	10404.9	7913.83	9800.39	9362.16	8919.72	9128.97	9752.72	9765.53	8738.65	11127.2	7647.2	7321.95	8271.31	9778.6	8989.23	7959.23	20681.2	6444.65
371	M31T7	31	31	31	7.42418	7.36845	8.05038	26	0	1	2	0	0	2	1	0	4	3	0	0	3	4	2	0	0	2	2		5.46624e-05	5.35967e-06	22625.2	40709.7	29658.3	31471.4	25974.3	37278.9	35066.4	26361.3	43075.6	32283.8	28677.3	21077.4	41376.6	78177.4	45436.2	24407.8	19775.9	29702	31453
372	M121T19	121.1	121.1	121.1	19.0238	18.9057	19.2323	9	0	0	0	1	0	0	0	0	0	0	0	0	0	0	2	0	2	3	0		5.49205e-05	5.36919e-06	2070.1	1783.31	1398.26	10237.9	2201.79	1700.56	2082.83	4475.23	2485.62	1495.3	3832.62	1498.32	1723.18	1521.96	22908.4	2304.06	20649.4	17315.7	2129.69
373	M51T13	51	51	51.1	13.1618	12.7887	13.4247	18	0	0	0	2	1	0	0	1	0	0	1	0	0	0	0	1	3	4	3		5.54943e-05	5.39017e-06	9411.13	11369.1	8968.13	94780.6	16117	10273.1	8105.18	14430.1	10470.3	8119.3	16668.3	8482.88	7522.75	8341.15	12235	12556.7	23157.1	615776	35085.2
374	M93T7_1	93.1	93.1	93.1	7.46039	7.1497	7.64142	76	3	2	3	4	2	4	4	2	1	2	5	3	2	4	3	3	5	4	5		5.58292e-05	5.40229e-06	20349	22568.9	41033.2	45884.1	26232.5	27206.4	348205	23260.6	23903.9	23434.2	60399.4	31355.4	70019.4	30697	46416.8	38930.8	6.91051e+06	132609	1.11384e+06
375	M93T17	93.1	93.1	93.1	17.4055	17.3867	17.701	13	0	0	0	4	1	0	0	0	0	0	0	0	0	0	0	1	3	2	2		5.59567e-05	5.40688e-06	2846.68	865.969	1415.82	275608	7386.28	562.182	2444.95	2695.97	1633.15	2130.08	6869.33	3393.85	862.207	728.853	6225.36	6704.85	24289	21189.6	29074.1
376	M85T16	85.1	85	85.1	16.2817	15.9512	16.6255	13	1	0	0	1	0	0	0	0	0	0	0	0	0	0	0	1	1	4	4		5.60433e-05	5.41e-06	9033.5	4418.73	3306.67	8246.52	10991.6	2723.27	6322.62	4267.9	4411.47	4519.25	9945.16	2657.4	2140.13	2509.99	7378.78	12334.2	8094.99	757368	27523
377	M56T16	56.1	56	56.1	16.1171	15.4626	16.2848	43	4	0	0	3	2	0	1	1	1	2	4	1	0	0	0	2	1	4	3		5.60501e-05	5.41024e-06	46200.5	3226.36	5949.45	13054.8	33635.4	2747.38	23055.1	8662.38	4984.91	35637.8	46290	12527.8	3675.33	4767.61	7878.43	58768.6	26838.6	347990	14081.2
378	M111T17	111.1	111.1	111.1	17.4017	16.8334	17.5339	11	0	0	0	4	0	0	1	0	0	0	0	0	0	0	0	1	1	0	1		5.60904e-05	5.41169e-06	1966.52	814.664	1296.2	38125.4	3326.98	875.988	3896.09	1993	1348.67	1279.49	2861.78	1398.42	955.125	962.591	1738.75	4040.93	4583.52	3621.16	5624.96
379	M141T12	141.1	141.1	141.1	11.7553	11.5858	11.9265	7	0	0	0	0	0	0	0	0	0	0	1	0	0	0	0	0	0	0	4		5.61945e-05	5.41541e-06	584.89	348.94	264.499	980.461	564.223	272.977	569.927	948.394	517.008	298.311	1747.55	275.971	454.609	331.269	735.954	545.299	852.64	398.925	2.87154e+06
380	M87T27	87.1	87.1	87.1	26.7167	26.0834	27.2242	15	0	0	0	0	0	0	0	0	0	0	0	0	0	0	0	0	0	0	5		5.64883e-05	5.42588e-06	582546	696970	594002	736817	679437	706034	682062	706705	735575	612672	779474	513141	552490	583711	803021	663247	453841	557976	873916
381	M135T14_1	135.1	135.1	135.1	14.3613	14.3325	14.5763	14	0	0	0	1	0	0	1	1	0	0	1	0	0	0	2	0	5	0	1		5.69261e-05	5.44136e-06	1563.13	2499.76	2499.02	8323.6	2185.97	1638.95	3531.9	2632.12	2691.08	805.691	5989.37	1393.14	1461.48	1617.18	39726.1	2743.92	104401	2118.48	3780.27
382	M94T12_1	94.1	94.1	94.1	11.6091	11.3139	12.0243	30	1	0	0	4	1	0	0	2	2	0	3	0	0	0	1	0	4	0	5		5.71733e-05	5.45004e-06	8231.83	190.448	359.356	99266.6	2026.41	203.633	418.026	26516.3	22136.9	164.096	7980.77	349.63	340.343	167.227	11152.4	1962.74	25712.9	484.797	405675
383	M117T13	117.1	117.1	117.1	13.0974	12.8044	13.4216	18	0	0	0	4	1	0	0	1	1	0	1	1	0	0	0	0	5	0	1		5.72145e-05	5.45148e-06	4834.7	4000.28	5812.23	311350	14316.5	4784.19	4530.68	10108.3	9415.18	3848.49	8106.88	8225.28	5729.3	3380.1	8440.41	5336.22	68688.9	4415.93	10025.3
384	M43T11_1	43	43	43.1	11.246	10.8727	11.4208	16	0	0	0	0	0	2	0	1	1	0	0	2	0	1	1	0	4	0	3		5.73696e-05	5.45689e-06	54314	56329.2	44253.7	58300.1	57516	55173.6	56936.7	67121.3	85403.4	46171.3	77674.8	45829.7	44869.9	40181.9	60790.5	61652	166800	45092.3	290201
385	M91T12	91.1	91.1	91.1	12.3553	12.1135	12.3604	13	1	0	0	0	0	0	0	0	2	0	5	0	0	0	0	0	2	3	0		5.76071e-05	5.46514e-06	13462.4	621.438	1679.36	8060.83	1763.16	2184.22	546.487	5650.99	13497.6	3196.37	61752.6	7995.83	729.283	675.067	2785.03	7673.06	34490.4	57806.3	2861.64
386	M162T13	162.1	162.1	162.2	13.0929	12.3564	13.1158	9	0	0	0	4	0	0	0	0	1	0	0	1	2	0	0	0	0	0	0		5.77478e-05	5.47001e-06	460.316	10.2679	2332.27	680369	11706.8	82.2843	140.087	4358.28	2882.58	22.7442	3302.01	4067.08	2196.51	25.3799	2825.75	557.737	4361.55	177.908	191.432
387	M60T18	60	60	60	17.9642	17.964	17.9714	3	0	0	0	0	0	0	0	0	0	0	0	0	0	3	0	0	0	0	0		5.77871e-05	5.47137e-06	6878.65	4060.45	3690.78	4826.21	5365.74	3984.69	4191.21	4316.27	4102.47	4705.11	5061.82	3532.95	3370.52	9801.63	4873.39	5549.9	5133.48	4169.99	2651.64
388	M86T16	86.1	86.1	86.1	15.6854	15.5166	15.9985	6	0	0	0	0	0	0	0	0	0	0	2	0	0	0	0	0	0	4	0		5.77984e-05	5.47176e-06	0	0	0	0	0	0	0	201.738	0	0	23247.7	0	0	0	0	0	0	99640.2	0
389	M55T15	55.1	55.1	55.1	14.8195	14.4206	15.0793	28	1	0	0	4	0	0	1	0	0	0	4	1	0	0	1	2	4	4	1		5.80465e-05	5.4803e-06	23380	2536.52	2547.67	295559	5052.88	2424.21	15970.6	5028.6	17083.7	8297.13	121887	12916.5	3397.52	2008.54	27909.5	45416.2	160135	824162	16213.4
390	M51T23	51	51	51	22.9757	22.2747	23.3079	8	0	0	0	0	0	0	0	0	0	0	0	0	0	0	1	1	1	3	0		5.81704e-05	5.48454e-06	2116.73	3132.83	2009.57	3061.65	2452.41	2407.9	2449.52	2726.94	2713.34	1589.09	3443.54	1813.42	1612.03	2295.79	3822.81	3597.3	3976.56	147016	2346.42
391	M168T25	168.1	168.1	168.2	25.3629	25.26	25.3782	5	0	0	0	2	0	0	0	0	0	0	1	0	0	0	1	0	0	0	1		5.86717e-05	5.50161e-06	2779.26	3739	1671.45	4604.71	1752.5	1553.99	1399.09	2415.29	2466.76	1225.51	3986.46	1364.83	1009.48	2257.67	4464.56	1586.35	2090.81	1314.28	3536.16
392	M96T12_2	96.1	96.1	96.1	12.36	12.289	12.6795	23	3	0	0	1	0	0	0	2	1	1	5	0	0	0	1	1	1	4	3		5.87711e-05	5.50497e-06	14820.9	524.037	1597.75	4118.15	780.253	2872.6	1303.79	12474.1	2281.71	4520.14	62232.8	1563.55	1173.04	451.738	5353.12	9179.25	5591.21	49838.7	223730
393	M66T7_2	66.1	66.1	66.1	6.93197	6.92083	6.93615	6	0	0	0	0	0	0	0	0	0	0	0	0	0	0	0	0	3	3	0		5.90135e-05	5.51314e-06	123.184	175.235	114.578	447.327	102.004	127.133	726.839	232.918	174.911	84.0042	356.374	110.365	139.566	107.989	484.401	545.251	60841.1	25026.2	1115.58
394	M102T27	102.1	102.1	102.1	26.9567	25.9386	27.6314	64	0	1	0	1	0	0	1	3	0	0	3	0	0	1	2	0	0	3	3		5.93723e-05	5.52515e-06	68691.4	75231.1	71814.5	101377	71340.8	77745.3	75496.9	92973.3	80212.4	65055.8	85102.2	60615.1	63268.4	53002.5	126182	74258.4	65097	87700.1	58206.6
395	M82T15	82.1	82	82.1	14.6933	14.3809	15.2503	44	1	0	0	4	1	0	2	1	2	1	3	2	0	0	1	2	5	4	1		6.01988e-05	5.55247e-06	4634.83	692.69	1135.76	67322.4	5414.17	666.677	8836.75	4100.06	6132.9	8374.39	30128.2	6610.34	669.636	614.342	14947.1	7948.81	43228.9	70986.3	9866.27
396	M79T9	79.1	79	79.1	9.16032	8.74003	9.563	37	0	0	1	4	2	2	0	2	2	2	5	1	0	0	2	2	4	0	4		6.04197e-05	5.55969e-06	3510.27	7997.87	10101.6	188377	93414.2	8567.54	14644.5	26938.3	152001	41572.9	178129	71860.3	8817.86	2601.98	57918.8	335316	229632	9883.49	42330
397	M105T16_1	105.1	105.1	105.1	16.1118	15.9963	16.5824	79	4	3	3	4	3	4	4	3	4	1	5	4	1	4	3	3	5	4	5		6.05469e-05	5.56383e-06	63007.1	93859.1	35993.6	93079.2	102650	85813.5	112469	102882	75964.2	12199	125595	49198.7	29269	55720.8	135279	113401	72409	962240	113233
398	M105T21	105.1	105	105.1	20.6233	19.7157	21.224	23	0	0	0	4	0	0	0	0	0	1	0	1	0	0	2	0	2	3	1		6.05639e-05	5.56438e-06	1555.11	2480.51	1222.89	30425.1	1840.13	1445.71	1511.5	1405.26	1342.86	2081.76	3074	1830.45	833.342	1078	10101.8	1921.4	15849.4	72548.1	2389.57
399	M53T12	53	53	53.1	11.826	11.414	12.3545	18	3	0	0	0	0	0	0	0	0	0	3	0	0	0	2	1	1	2	5		6.06607e-05	5.56753e-06	4758.06	1260.65	1486.18	6215.43	3543.36	1852.56	3309.95	4624.23	2039.38	3568.02	15932.8	2389.94	2695.53	872.236	10544.4	3948.36	10628.8	9381.09	1.0157e+06
400	M87T37_1	87.1	87.1	87.1	37.413	37.1975	37.7232	13	0	0	0	0	0	0	0	0	0	0	0	0	0	0	0	0	0	0	5		6.09351e-05	5.5764e-06	861088	1.09761e+06	871933	1.06264e+06	982949	992056	981324	1.0284e+06	1.06708e+06	725401	1.0715e+06	772779	824451	883348	1.11017e+06	1.00139e+06	680145	806996	1.09509e+06
401	M69T8_2	69.1	69.1	69.1	7.6222	7.43133	7.89813	35	0	2	1	0	0	2	3	1	3	2	0	0	2	0	2	0	5	4	4		6.09984e-05	5.57844e-06	6387.21	25145.8	10591.3	11357.6	2258.59	28726.4	49290.7	16605.3	34205.3	14330.3	9799.46	3057.35	49161.6	3031.47	43204	8716.81	377726	161508	148742
402	M83T19_2	83.1	83.1	83.1	18.5041	18.4335	18.5895	4	0	0	0	0	0	0	0	0	0	0	0	0	0	0	0	0	0	3	0		6.12906e-05	5.58782e-06	3583.39	1611.7	2116.72	4673.07	3316.36	1985.35	2644.66	2230.65	1957.97	1896.93	3791.41	1600.89	1546.83	2029.15	5955.75	4149	2810.97	82975.1	2319.67
403	M92T17	92.1	92.1	92.1	17.4058	17.3029	17.4604	7	0	0	0	4	0	0	1	0	0	0	1	0	0	0	0	0	0	0	1		6.12914e-05	5.58785e-06	504.639	733.554	358.131	40003.2	1176.82	487.93	3480.7	720.407	614.962	385.807	4632.87	486.965	237.385	384.975	1450.11	1041.29	2661.12	1466.75	7431.82
404	M66T8	66.1	66.1	66.1	8.31069	8.24325	8.34648	10	0	0	0	4	0	0	0	0	0	0	1	0	0	0	0	0	0	4	0		6.13617e-05	5.5901e-06	6968.96	92.3168	285.528	136184	171.606	267.336	379.927	13741	2911.95	377.618	28190	4107.63	400.447	5152.82	311.199	3134.2	12452.2	517312	494.353
405	M110T16	110.1	110.1	110.1	16.0738	15.9512	16.3944	6	0	0	0	0	0	0	0	0	0	0	1	0	0	0	0	0	0	3	1		6.14205e-05	5.59197e-06	1525.57	499.168	486.65	880.698	1326.3	484.963	1118.07	2269.47	385.186	586.664	6762.57	814.594	609.17	353.44	2017.22	926.773	1257.36	466201	6514.06
406	M133T14	133.1	133.1	133.1	14.4212	13.5207	15.1255	148	3	3	3	4	3	4	4	3	4	2	5	3	2	4	3	3	5	4	5		6.15048e-05	5.59466e-06	18077.4	27650.5	17858.3	117624	23349.6	21547.3	28112.5	62933.6	41899.6	12028.9	38467.9	28270.2	13927.8	20784.8	84398.2	25261.2	323399	34782.6	33427.5
407	M87T28	87.1	87.1	87.1	27.9648	27.3958	28.5767	21	0	0	0	0	0	0	0	0	0	0	0	0	0	0	0	0	0	0	5		6.17048e-05	5.60102e-06	531694	612134	565273	668424	531886	552219	596108	601600	650892	564575	669079	405794	513094	491399	711123	581977	379586	503899	969157
408	M136T7_1	136.1	136.1	136.2	7.45307	7.14207	7.62038	36	2	1	3	0	2	0	3	0	1	2	2	3	3	1	0	1	4	2	1		6.19212e-05	5.60787e-06	7208.04	7652.48	13408.1	13115.8	8220.61	9962.03	117271	5392.86	7653	8114.18	17703.7	11271.9	23882.8	9873.2	16725.1	12766.5	1.45215e+06	52781.9	278143
409	M136T15	136.1	136.1	136.1	14.8211	14.6754	15.1021	12	2	0	0	0	0	0	0	0	0	0	3	1	0	0	1	0	2	1	1		6.19913e-05	5.61008e-06	15409.3	62.4382	144.892	13548.2	339.344	153.643	340.828	126.307	1076.96	139.108	6725.25	899.5	103.531	74.3716	37435.8	2214.55	3364.91	13837.1	1032.53
410	M85T8_1	85.1	85	85.1	7.62038	7.18612	7.94353	27	2	0	0	0	0	1	2	0	0	1	4	0	2	0	1	3	1	2	5		6.21358e-05	5.61463e-06	11318.4	1560.07	2110.82	4139.55	5673.77	8820.13	26271.7	3892.72	2323.18	4841.83	15329.7	4223.99	53164.6	2949.91	27244	18301.6	54294.6	24339.4	1.06637e+06
411	M152T12	152.1	152.1	152.1	12.0377	12.0304	12.0475	6	0	0	0	0	0	0	1	0	0	0	0	0	1	1	0	0	3	0	0		6.22633e-05	5.61864e-06	429.057	90.4811	339.522	853.584	417.286	180.354	652.713	148.044	373.502	310.921	2959.09	131.113	1205.74	1751.95	1281.47	250.234	12576.9	61.43	3237.42
412	M126T12	126.1	126.1	126.1	11.8758	11.5858	12.0158	10	0	0	0	0	0	0	0	0	0	0	1	0	0	0	0	0	1	0	5		6.22931e-05	5.61957e-06	3065.14	470.388	514.177	2835.56	2204.1	429.832	1661.71	1400.65	1098.03	664.782	4125.38	1698.73	625.805	917.489	2764.42	2431.05	2087.52	4309.4	1.37509e+06
413	M147T28	147.1	147.1	147.1	28.0165	26.4572	28.8896	158	0	1	1	2	2	1	0	2	1	0	3	2	0	0	1	1	1	0	4		6.24101e-05	5.62323e-06	123017	194552	122470	177809	109236	129685	134841	154682	155424	122163	195443	62343.1	111789	125439	167711	125249	129857	111339	159186
414	M80T18_2	80.1	80	80.1	18.4495	18.4262	18.7307	4	0	0	0	0	0	0	0	0	0	0	0	0	0	0	0	0	1	2	0		6.27656e-05	5.63431e-06	364.823	496.825	279.539	1164.6	501.958	351.572	455.69	491.488	576.115	290.015	651.922	435.73	284.827	343.459	2701.84	584.729	1458.69	16290.3	422.417
415	M68T17	68.1	68	68.1	17.406	17.3813	17.4635	8	0	0	0	4	0	0	0	0	0	0	1	1	0	0	0	0	0	0	2		6.27673e-05	5.63436e-06	738.785	352.411	497.334	31387.4	827.791	410.869	706.598	982.849	450.443	980.132	2075.59	1192.2	329.594	433.642	754.786	1126.35	3904.13	5353.97	29161.5
416	M83T14	83.1	83.1	83.1	13.724	13.6283	13.9812	18	2	0	0	4	0	0	0	0	0	0	1	0	1	0	2	0	4	1	2		6.32207e-05	5.65573e-06	14213.6	2673.29	3585.87	95940.5	11106.4	1968.46	8828.59	7909.66	5312.81	6289.18	31213.5	5349.35	7897.86	1761.59	20599.1	11365.8	85308.7	14926.2	68995.2
417	M81T14	81.1	81.1	81.1	13.8891	13.4524	14.1983	40	0	0	0	4	0	0	0	0	1	0	2	2	0	2	3	2	5	4	4		6.34068e-05	5.66446e-06	1741.29	971.005	1728	1.36045e+06	2999.33	902.814	2887.41	5299.59	7862.07	1250.67	17675.6	9037.09	4851.98	10423.1	321213	8202.46	135537	30848.6	104866
418	M103T8	103.1	103.1	103.1	8.30833	8.1743	8.73632	39	2	0	0	4	1	0	1	2	1	1	5	1	1	3	2	0	3	4	4		6.38018e-05	5.68468e-06	32552.8	21278.3	16152.1	278182	26760.8	21011	22317.4	50272.4	29534.3	16799.1	1.41067e+06	26073	23903.6	38984.2	32971.1	26081.7	70580.8	979639	53849.9
419	M150T9	150.2	150.1	150.2	9.16145	9.15448	9.18577	12	0	0	0	1	1	0	0	1	1	1	3	0	1	0	0	2	0	0	1		6.42049e-05	5.7052e-06	123.26	18.9323	2816.2	109284	45255.9	256.004	2560.63	7976.66	93589.6	25363.4	104790	42340	4097.47	3.1221	23265.6	248243	25529.9	317.162	20437.7
420	M134T13	134.1	134.1	134.1	13.092	12.801	13.1158	32	0	0	2	4	2	0	1	3	3	0	1	2	2	0	1	1	5	0	0		6.51754e-05	5.75416e-06	2608.77	255.427	13057.6	1.26378e+06	44968.1	1106.19	920.428	26500.4	20009.9	271.793	13811.4	21826.9	5717.53	234.964	10526.1	5558.68	60208.7	1413.86	524.415
421	M162T14	162.2	162.1	162.2	13.901	13.8902	13.9812	6	0	0	0	4	0	0	0	0	0	0	1	0	0	0	1	0	0	0	0		6.52449e-05	5.75765e-06	17.2405	61.4384	93.3443	286409	110.096	33.0891	100.16	335.246	874.338	30.8382	792.61	310.364	99.8	35.0555	107023	84.7202	5168.44	1011.98	357.427
422	M93T16	93.1	93	93.1	15.9917	15.6901	16.5824	35	3	0	0	3	1	1	2	1	0	0	2	1	0	0	1	1	3	4	5		6.53246e-05	5.76163e-06	23141.6	1490.99	2631.73	10331.2	11557.1	2483.22	14727.4	8752.89	1782.29	5978.95	15133	6837.24	1768.99	982.504	7086.08	11453.6	17545.1	4.89981e+06	62053.6
423	M136T14	136.1	136.1	136.1	14.1761	13.939	14.3633	14	0	0	0	1	0	0	0	0	0	0	3	0	1	3	0	1	2	3	0		6.55507e-05	5.77293e-06	914.954	142.99	273.787	7954	1116.93	180.641	720.621	1445.68	1801.19	582.712	8658.34	432.91	1641.96	16886.8	5869.21	5063.2	11299.3	116161	2380.96
424	M69T11	69.1	69.1	69.1	11.1446	11.0642	11.155	7	2	0	0	0	0	0	0	0	0	0	1	0	1	0	0	0	0	0	3		6.6298e-05	5.81158e-06	25382.5	6498.84	7780.9	17639.6	13307.5	5965.54	20972	20627.8	7974.63	12113.4	32760.9	7518.04	25812.7	5144.05	16020.8	18689.8	19575.6	10019.5	401243
425	M122T9	122.1	122.1	122.1	9.15901	8.74168	9.17868	38	0	0	1	4	3	0	1	1	4	2	4	2	0	0	1	2	5	2	2		6.67151e-05	5.833e-06	230.637	153.255	2270.81	56435.6	26709.4	339.654	2235.03	4667.23	48104.1	14699	51880	22967.2	2596.17	65.2463	13853.1	109047	64871.4	3481.7	12083.5
426	M72T14	72.1	72.1	72.1	13.8974	13.8902	13.9553	4	0	0	0	3	0	0	0	0	0	0	0	0	0	0	0	0	1	0	0		6.72936e-05	5.86252e-06	5977	8254.02	6232.37	23370.2	7768.71	8656.04	7015.99	7532.24	6151.33	6553.27	9838.35	5830.03	5305.39	5585.96	8256.98	7746.75	10935.5	4700.31	8594.13
427	M110T8_1	110.1	110.1	110.1	8.17646	8.0469	8.32395	12	0	0	0	1	0	0	0	0	0	0	2	0	0	0	0	0	1	3	4		6.82286e-05	5.90979e-06	708.683	259.758	179.444	1630.92	621.613	451.332	1074	511.202	278.491	180.417	5129.19	328.841	2184.52	138.586	1013.73	661.226	5763.78	8837.27	25622.9
428	M52T12	52	52	52.1	11.8225	11.5858	12.11	14	0	0	0	0	0	0	1	0	1	0	0	0	1	0	0	1	1	3	5		6.90644e-05	5.95159e-06	432.819	269.268	218.882	419.931	245.78	363.772	825.242	460.423	608.142	377.523	567.222	182.554	661.602	217.21	462.153	760.634	1836.16	11777	656092
429	M81T16	81.1	81.1	81.1	16.0013	15.7989	16.5824	26	4	0	0	0	2	0	1	0	0	1	3	1	0	0	0	0	2	4	3		6.90708e-05	5.95191e-06	15557.9	1487.66	2748.96	4835.25	10504.5	1314.46	9376.39	11446.2	1842.08	4699.64	28331.7	5427.21	1567.11	1383.17	4243.16	7209.66	12685.1	2.1107e+06	43566.9
430	M84T13	84.1	84.1	84.1	13.094	12.781	13.1158	4	0	0	0	3	0	0	0	0	0	0	0	0	0	0	0	0	1	0	0		6.92572e-05	5.96117e-06	0	0	0	30102.8	0	0	0	0	0	0	0	0	0	0	0	0	22234.2	0	2015.15
431	M65T16	65.1	65	65.1	16.1116	15.8299	16.5784	10	0	0	0	0	0	0	0	1	0	1	1	1	0	0	0	0	0	4	0		6.93059e-05	5.96359e-06	6415.29	3360.25	2187.16	4396.05	3663.7	4535.35	5440.82	20841.8	3926.34	3295.47	20279.2	4773.45	2663.22	2981.59	15569.1	7322.67	5122.69	1.2038e+06	13966.3
432	M81T12	81.1	81.1	81.1	11.8447	11.4208	12.6642	65	3	1	0	4	2	1	3	3	3	1	5	0	0	0	2	2	5	4	5		7.00699e-05	6.00131e-06	27252.5	6056.24	5198.87	94538.4	19346.8	4643.41	19776.4	23787.9	92614.6	19195	51094.8	9146.21	12637	1975.91	12029.7	24926.7	75053.1	23061.9	1.53385e+06
433	M121T7	121.1	121.1	121.1	7.45203	6.6315	7.8609	102	3	2	4	4	3	4	4	2	3	3	5	3	3	4	2	2	5	4	5		7.03653e-05	6.0158e-06	8036.23	8615.69	14693.6	16810.7	9053.89	10971	125296	7608.19	9922.22	9366.85	21739.4	11911.4	25685.5	12112.5	16286.7	14971.4	2.4135e+06	49305	427289
434	M138T8	138.1	138.1	138.1	7.97962	7.44037	8.32275	18	0	0	1	1	0	0	1	2	0	1	1	1	1	0	0	0	3	0	5		7.06665e-05	6.03053e-06	2140.46	165.684	1066.18	2351.35	544.411	197.778	2208.55	7418.82	961.031	1933.95	4194.11	1839.94	6378.7	386.986	664.94	871.914	7683.34	362.853	25283.8
435	M64T8	64.1	64.1	64.1	8.31258	8.24988	8.34648	7	0	0	0	3	0	0	0	0	0	0	0	0	0	0	0	0	0	3	0		7.1266e-05	6.05967e-06	913.524	20.3446	9.19333	24223.9	28.3221	82.0393	116.324	1906.11	362.215	24.7423	7356.87	325.292	31.4311	936.361	79.7092	537.48	1449.89	101239	54.7074
436	M137T14	137.1	137.1	137.2	13.956	13.6846	14.2814	10	0	0	0	1	0	0	0	0	0	0	0	0	0	1	1	0	5	1	0		7.13855e-05	6.06545e-06	280.788	150.4	231.287	21489.7	553.178	148.172	407.949	529.559	479.48	268.306	1650.89	326.88	263.692	1118.13	2989.5	486.051	25942.5	6550.68	499.609
437	M81T8	81.1	81	81.1	8.30177	7.96195	8.73273	50	3	0	1	4	0	0	2	3	2	1	5	1	1	3	0	2	5	4	3		7.16815e-05	6.07975e-06	46483.5	1056.32	1631.09	627865	1492.51	3361.94	6632.84	79141.1	29344.3	9676.08	215147	27647.7	9993.92	40797.7	3161.67	21804.3	98717.5	2.24404e+06	84655.7
438	M133T19	133.1	133.1	133.1	18.9184	18.5011	19.2397	12	0	0	0	3	0	0	0	0	0	0	0	0	0	0	2	0	3	0	0		7.17966e-05	6.08529e-06	20643.8	25428.7	18638.4	43598.6	22954.2	23808.1	23480	25611	23827.2	19755.2	25283.9	18472.3	19343.9	19534.2	59767.6	22334.3	33012.3	18425.8	22796.2
439	M51T16	51	51	51.1	16.0718	15.2326	16.6698	111	4	3	1	3	3	4	4	3	4	1	5	2	1	2	3	3	5	4	5		7.19988e-05	6.09501e-06	27874.2	25608.1	13117.7	22400	24090.6	24036.6	26859.2	89185	22328	11311.1	150170	17597.9	13833.1	16703.4	90811.4	35614.9	22442.9	2.46401e+06	57276.1
440	M111T16	111.1	111.1	111.1	16.004	15.4626	16.3908	45	4	0	0	1	3	0	1	0	1	1	3	0	0	0	0	3	4	4	2		7.21335e-05	6.10147e-06	8997.88	1153.52	2211.44	3488.16	11315.8	1221.72	5933.82	2944.15	2448.25	3083.78	12070.7	2745.57	1302.22	1312.75	2921.96	8956.88	6813.78	3.36142e+06	33298.2
441	M87T38	87.1	87.1	87.1	38.1864	37.7732	38.5677	22	0	0	0	0	0	0	0	0	0	0	0	0	0	0	0	0	0	0	5		7.23548e-05	6.11207e-06	496591	653030	599115	679586	639936	624485	645548	657915	649637	566167	659102	416312	491529	500001	676475	573913	427798	490559	755840
442	M119T10	119.1	119.1	119.1	9.99715	9.95985	10.399	29	0	2	0	2	0	2	1	1	0	0	1	0	1	0	2	3	5	3	0		7.32186e-05	6.15333e-06	1546.86	5396.05	2164.11	8053.87	3910.96	8393.37	10309.5	3043.65	3353.38	661.896	5584.52	1906.46	19582.3	2100.94	17526.5	7787.3	95723.3	14548.8	3042.53
443	M159T21	159.1	159.1	159.1	20.869	20.6156	20.9811	10	0	0	0	3	0	0	0	0	0	0	0	0	0	0	1	0	3	0	0		7.40168e-05	6.19108e-06	1594.96	1961.96	1490.93	8675.81	2084.68	1575.97	1618.27	1819.97	2189.55	1450.26	2003.18	1294.51	1180.52	1240.98	5775.85	1774.37	15427	1189.87	1192.92
444	M221T20	221.1	221.1	221.1	20.0775	19.5293	20.5635	23	0	2	1	3	2	3	2	1	3	0	2	0	0	0	2	0	0	1	1		7.49704e-05	6.23572e-06	1809.01	10670.3	1489.18	11961.1	4768.66	5447.27	5035.3	6974.8	8516.26	1386.6	7202.33	2288.54	1209.21	1742.33	12867.1	1575.47	2397.36	2283.84	1460.84
445	M126T32	126.1	126.1	126.1	31.6195	31.5095	31.7835	21	2	0	1	0	1	0	0	0	0	0	2	1	2	2	3	1	3	3	0		7.51623e-05	6.24464e-06	22860.5	8640.29	21095.6	7893.52	24240.4	10505.3	13551.1	9907.7	7250.91	23030.3	17540.6	23331.4	22321.6	22651	37212	24641.8	31153.2	24206	5875.39
446	M71T8_1	71.1	71.1	71.1	7.614	6.54755	8.03355	54	4	0	0	1	1	3	3	0	0	0	5	1	2	0	1	3	4	3	5		7.55657e-05	6.26333e-06	24158.1	5788.33	6297.08	13136.3	15252	28323.4	43602.7	7601.15	8797.87	8371.69	32658.4	10767.6	97164.3	10110.2	50995.2	37486	115010	196578	144430
447	M84T15	84.1	84	84.1	14.648	14.3962	14.9276	12	0	0	0	0	0	0	1	0	0	0	0	0	0	0	0	1	2	3	5		7.57117e-05	6.27008e-06	0	0	0	0	0	0	19222.9	0	0	0	0	0	0	0	0	13333.4	28178.8	443464	459023
448	M40T14	40	40	40.1	13.8992	13.6846	14.1529	10	0	0	0	4	0	0	2	0	0	0	0	0	0	0	0	0	3	0	0		7.61495e-05	6.29023e-06	3408.16	4524.79	3528.03	98813.6	4528.06	3420.87	11688.1	5512.78	4939.49	3804.81	10840.3	3842.39	2973.52	3278.61	10013.8	4201.8	11705.1	4277.65	3285.77
449	M95T13	95.1	95	95.1	13.0883	12.663	13.5207	64	1	0	1	4	2	1	1	3	3	0	3	2	1	1	3	3	4	0	5		7.6933e-05	6.32604e-06	6861.28	650.074	11947	1.15254e+06	40462	2193.25	5681.66	25416.9	17185.7	4382.32	29559.6	19426.7	11680.2	1780.16	17093.6	8421.83	51438.1	4295.86	1.53004e+06
450	M148T13	148.1	148.1	148.2	13.091	12.3469	13.2838	27	2	0	1	3	2	0	0	1	1	0	0	2	1	0	1	1	5	1	0		7.80885e-05	6.37826e-06	3005.8	176.508	13268.2	1.6579e+06	47334	964.649	791.053	25332.3	19757.4	148.236	13433.1	24516.2	6115.44	236.339	11744	5658.27	49581.6	2977.04	374.901
451	M93T12_2	93.1	93.1	93.1	11.613	11.3099	11.8938	30	1	0	0	4	0	0	0	2	2	0	0	1	0	0	2	0	5	0	5		7.81857e-05	6.38262e-06	10677.4	250.573	1999.78	280927	748.549	478.801	1693	22672.7	15838.3	839.703	1304.8	6351.9	1026.98	550.062	32701.8	1859.79	143134	6852.99	677985
452	M112T16_2	112.1	112.1	112.1	16.2188	15.9512	16.3871	7	0	0	0	0	0	0	0	0	0	0	0	0	0	0	0	0	0	3	1		7.82468e-05	6.38536e-06	749.863	534.569	368.41	770.662	1401.67	320.806	938.684	554.49	603.775	430.717	1495.89	511.805	326.616	370.65	667.274	1243.4	538.484	19333.4	4733.86
453	M82T7_1	82.1	82.1	82.1	7.44703	7.21563	7.6222	17	0	0	0	0	0	0	1	0	0	0	0	0	1	0	0	0	5	3	5		7.85966e-05	6.401e-06	330.276	627.992	902.072	1067.38	484.374	1004.1	11031.2	853.831	494.707	468.372	1522.3	607.164	7979.14	646.162	2032.99	1541.58	187186	36945.1	57024.4
454	M145T17_2	145.1	145.1	145.1	17.4055	17.402	17.7414	5	0	0	0	4	0	0	0	0	0	0	0	0	0	0	0	0	1	0	0		7.88299e-05	6.4114e-06	845.624	1209.45	686.636	21830.7	1487.01	828.089	993.539	1233.98	905.197	724.743	1696.78	1052.36	552.117	793.241	2187.32	1453.14	4751.48	860.277	1367.57
455	M66T12	66.1	66.1	66.1	11.7249	11.5858	11.9265	9	0	0	0	1	0	0	0	0	0	0	0	0	0	0	0	0	0	0	5		7.98979e-05	6.45864e-06	200.05	100.995	109.027	4696.07	152.137	169.998	149.23	312.987	265.604	439.822	304.542	153.137	344.01	133.58	274.009	368.314	1598.37	620.714	6.93173e+06
456	M92T14_2	92.1	92.1	92.1	13.8839	13.627	13.9891	24	0	0	0	4	0	0	0	1	0	0	3	1	0	0	1	0	5	0	4		7.9992e-05	6.46278e-06	138.02	76.7514	156.317	718829	315.735	90.5036	198.609	4701.43	667.782	192.015	41513.9	5749.31	154.722	108.291	21909.6	254.641	81666.8	7908.34	96071.9
457	M53T8	53.1	53	53.1	8.30329	7.85243	8.70833	18	1	0	0	4	0	1	2	0	0	0	0	0	1	0	0	0	0	4	3		8.0082e-05	6.46673e-06	27734.1	724.782	723.727	651602	659.671	1703.32	4550.45	60040.7	15392.3	2351.23	147077	15917.8	5012.44	19398.7	1275.97	11698.3	31199	2.40832e+06	330088
458	M55T13	55.1	55.1	55.1	12.7698	12.3433	13.1928	93	4	3	4	4	3	4	4	3	3	3	5	4	3	3	3	3	3	4	5		8.04015e-05	6.48072e-06	209771	230801	244498	281414	244768	234892	226746	225941	206213	205575	279747	194604	185485	192965	317848	270719	282332	204794	292669
459	M116T8	116.1	116.1	116.1	8.3016	7.82702	8.72123	15	0	0	0	4	0	0	0	0	0	1	1	0	0	0	0	0	2	4	1		8.06241e-05	6.49044e-06	1179.72	585.636	516.894	18525.6	405.296	606.135	647.829	1834.87	980.178	5597.22	3649.91	777.316	423.416	1076.25	703.963	584.555	6408.45	72908.6	3974.49
460	M76T12	76.1	76	76.1	12.0421	12.0292	12.0565	7	0	0	0	0	0	1	0	0	0	1	2	0	0	0	2	0	0	0	1		8.26502e-05	6.57779e-06	883.912	274.931	434.092	307.233	388.061	863.566	562.426	1911.38	390.26	1448.71	53415.2	424.671	502.743	438.585	37236.1	439.989	565.971	14626	3342.58
461	M39T14_1	39	39	39	14.4321	14.1514	15.2503	53	4	0	1	4	1	0	3	3	2	2	3	3	0	1	1	3	5	3	4		8.27464e-05	6.58188e-06	13119.6	5640.63	5181.46	58508.9	7012.03	4187.99	12518.7	15303.8	13360.4	10070.7	24766.4	14500.5	3371.28	5651.95	21560.9	20682.4	103396	89807.2	114953
462	M43T29	43	43	43	28.577	28.1309	29.1299	31	1	0	2	0	0	0	0	0	0	2	0	3	0	0	0	0	4	0	0		8.31181e-05	6.59767e-06	604184	859188	628253	806439	723177	717553	741380	755277	816153	708230	792701	613879	596125	692686	775924	731306	628851	594972	533339
463	M69T15_2	69.1	69.1	69.1	14.809	14.2732	15.0876	71	2	0	1	4	2	0	1	3	2	1	5	3	0	2	3	2	5	4	2		8.35399e-05	6.61551e-06	38277.5	3192.38	7666.24	430811	34135.8	3369.43	26490.3	23670.7	31829	19028	169065	37187.9	3372.07	12405.1	210842	55835.4	100479	1.45628e+06	40396.1
464	M65T15	65	65	65.1	15.0743	14.8134	15.492	11	0	0	0	1	0	0	1	0	0	0	1	2	0	0	0	2	0	3	0		8.40737e-05	6.63797e-06	4562.15	553.379	1907.51	19195.5	3744.8	828.218	2154.72	7407.6	1935	928.891	4811.16	6077.5	701.821	585.078	5414.34	15276.8	5905.1	476612	10076.8
465	M94T9	94.1	94	94.1	9.15916	8.74003	9.57503	34	0	0	0	4	2	0	0	0	3	2	5	1	0	0	1	3	5	0	3		8.48571e-05	6.67069e-06	302.15	336.565	1851.57	58472.3	26675.9	449.584	2104.32	4718.24	48052.2	15136.1	55434.2	23270.2	2573.57	165.587	14608.3	109899	60660.4	897.072	17707.4
466	M135T8	135.1	135.1	135.2	8.32777	8.21425	8.57953	19	0	0	0	3	0	0	0	0	0	0	1	0	1	0	1	0	5	4	2		8.50636e-05	6.67926e-06	849.389	258.306	177.017	18627.4	240.174	236.664	322.157	1437.01	708.977	261.756	2599.02	563.137	1286.75	707.226	1194.64	495.913	18644.3	31541.3	4504.78
467	M112T12	112.1	112.1	112.1	11.824	11.3261	12.2374	33	1	1	2	0	0	1	1	2	2	2	4	1	0	1	0	1	3	1	5		8.51356e-05	6.68225e-06	20488.8	5826.08	4473.21	7057.71	13683.8	2935.42	16185.4	12849.7	4326.38	14989.9	22946.5	5970.5	2915.75	2696.87	8292.11	20393.8	12662.6	2848.57	4.27151e+06
468	M124T14	124.1	124.1	124.1	13.9776	13.9477	14.1755	7	0	0	0	0	0	0	1	1	0	0	0	0	0	0	1	0	3	1	0		8.51536e-05	6.68299e-06	357.489	139.343	261.414	4970.57	641.481	190.113	1580.17	899.745	354.397	260.975	1289.09	322.584	631.447	180.855	2037.62	703.739	3868	1810.86	828.984
469	M119T21	119.1	119	119.1	20.6161	19.6327	20.9805	19	0	0	0	4	0	0	0	0	0	0	1	0	0	0	1	1	2	4	0		8.59105e-05	6.71423e-06	1977.24	2491.65	1844.36	22416.9	2602.17	2384.82	2771.45	2969.86	3091.15	1734.26	13476.8	2271.5	2080.41	2466.47	8812.14	6904.67	28119.5	87568.8	1963.59
470	M81T21	81.1	81.1	81.1	20.9781	20.7641	21.5502	9	0	0	0	1	0	0	0	0	0	0	0	0	0	0	0	0	3	4	0		8.61457e-05	6.72389e-06	1908.34	1342.74	1193.96	10827.4	1720.53	1414.74	1520.42	2065.96	1870.69	1056.48	2860.88	1401.36	785.96	2196.64	4204.13	1574.07	62209.4	723983	2217.72
471	M91T8_2	91.1	91	91.1	7.58342	7.43188	7.8279	35	0	0	1	0	0	2	4	0	1	0	0	0	2	0	1	0	5	1	5		8.66728e-05	6.74543e-06	4968.36	2394.79	12058.8	4278.85	3183.16	15405.4	70319.7	6985.67	6348	1387.2	5433.14	2041.33	77926	1887.57	32871.1	16407.5	3.13699e+06	63586.6	275097
472	M56T7_2	56.1	56.1	56.1	7.4623	7.43438	7.81957	15	0	0	0	0	0	0	1	0	0	0	0	0	1	1	0	0	5	2	4		8.669e-05	6.74613e-06	2131.9	4801.7	2669.39	3143.63	1249.87	5193.51	10002.8	3451.97	5204.75	3670.76	3973.49	1142.25	23922.6	11156.1	8235.9	3320.34	42824	24122.3	493612
473	M38T12	38	38	38.1	11.8934	10.9274	12.6642	20	0	0	0	0	0	0	1	0	0	0	4	0	1	0	1	0	1	4	5		8.70904e-05	6.76241e-06	1374.25	1195.68	991.013	1110.27	1104.9	1155.14	1771.75	1866.42	1142.63	1371.85	20822.5	919.439	1593.67	967.224	18040	1195.08	1484.03	11516	364342
474	M140T16_2	140.1	140.1	140.1	16.2531	16.2317	16.2746	2	0	0	0	0	0	0	0	0	0	0	0	0	0	0	0	0	0	2	0		8.7179e-05	6.766e-06	336.338	126.599	138.928	225.134	269.303	93.4059	269.209	178.222	152.467	140.363	746.534	165.662	117.662	70.8538	159.894	496.913	318.32	19155.2	4637.02
475	M121T18	121.1	121	121.1	18.1737	17.8555	18.716	30	0	0	1	3	1	0	1	0	0	0	2	1	0	3	3	1	3	4	0		8.81615e-05	6.80561e-06	3140.34	1484.8	2265.18	64333.1	7062.32	1037.91	3343.18	1009.44	2205.08	2202.51	7762.5	3832.79	941.823	6392.56	22590.9	4892.2	11490.2	24824.9	1780.38
476	M68T10	68.1	68.1	68.1	10.4024	10.0702	10.7522	36	1	1	1	1	1	0	2	3	0	1	5	0	0	0	1	2	3	4	5		8.84401e-05	6.81676e-06	18298	7401.41	7971.32	22192	17587.5	4342.18	21688.7	20231.4	4778.58	18697.9	40188.8	8244.49	6699.25	5129.15	11227.9	23687.2	21494.3	27729.5	158191
477	M95T7_2	95.1	95.1	95.1	6.93613	6.72547	6.94358	9	0	0	0	0	0	0	0	0	0	0	0	0	0	0	0	0	5	3	0		8.92726e-05	6.84989e-06	321.416	557.071	436.088	867.753	471.589	838.944	2318.54	623.257	544.872	303.904	675.766	383.412	3436.5	452.249	1806.55	1322.64	62500.2	16702.1	1723.41
478	M160T14_1	160.2	160.2	160.2	14.4319	14.4281	14.7096	6	0	0	0	1	0	0	0	0	0	0	0	0	0	0	0	0	4	0	0		8.96546e-05	6.86499e-06	27.9358	7.80819	28.3587	17400.1	149.752	29.6136	69.2435	3167.58	4962.98	12.6367	237.437	1444	13.1744	12.6969	252.181	63.0109	68332.4	1315.58	176.991
479	M70T14	70.1	70.1	70.1	13.7012	13.6245	13.9032	25	2	0	1	4	0	0	1	1	0	0	2	0	1	0	1	1	5	2	4		8.97403e-05	6.86837e-06	17363.4	3290.98	5139.69	382856	11950	3931.33	13153.1	11054.7	4977.85	9245.93	34511	8204.38	14135.2	3039.11	23316.3	12917.1	104421	9047.53	92998.9
480	M145T16	145.1	145.1	145.1	15.5692	15.5643	15.8043	4	0	0	0	0	0	0	0	0	0	0	0	0	0	0	1	0	3	0	0		9.10999e-05	6.92157e-06	394.482	356.222	305.598	581.084	285.845	277.378	421.047	228.272	409.176	329.32	1423.43	264.79	240.204	285.446	6388.55	470.442	7284.72	355.387	497.827
481	M161T21	161.1	161.1	161.1	20.8865	20.6194	21.2659	8	0	0	0	1	0	0	0	0	1	0	0	0	0	0	3	0	2	0	0		9.16446e-05	6.94267e-06	4223.95	4940.6	4032.89	8438.47	4728.22	4333.32	3978.24	4321	5883.14	4285.68	5477.68	3853.64	3470.76	3658.71	22435.9	4058.71	16225.4	23452.1	4326.46
482	M108T13	108.1	107.9	108.1	12.9541	12.0406	13.4216	47	2	0	1	4	2	0	0	2	2	1	4	2	0	0	1	1	5	3	2		9.23834e-05	6.97108e-06	3035.01	185.528	5791.96	657143	21526.1	363.694	589.165	12468.2	9332.24	1661.17	14129.2	9938.99	2982.42	192.503	7108.37	3267.86	57439.2	3801.06	6969.09
483	M120T13	120.1	119.9	120.1	13.086	12.5005	13.4297	50	2	0	2	4	2	0	1	3	4	0	1	3	2	1	2	2	5	4	0		9.28156e-05	6.9876e-06	4836.95	42.7543	21641.8	2.65396e+06	78282.2	1144.62	1350.2	46552.7	37938.1	101.105	23990.4	38413.4	9049.26	269.505	20930.9	9631.83	79700.7	8328.6	505.237
484	M142T12	142.1	142.1	142.1	11.6983	11.5858	11.7513	4	0	0	0	0	0	0	0	0	0	0	0	0	0	0	0	0	0	0	4		9.33205e-05	7.0068e-06	111.065	112.237	47.4156	456.296	67.2738	40.2966	66.9833	100.167	148.465	62.9435	211.001	29.7124	23.6512	33.1072	87.3649	85.6	170.744	24.15	256523
485	M122T7	122.1	122.1	122.1	7.43187	6.6315	7.61045	31	0	0	0	0	0	0	2	0	0	0	0	0	1	0	0	0	5	3	4		9.40929e-05	7.03599e-06	491.42	644.502	872.755	1194.58	629.806	856.239	12563.1	514.292	753.82	1047.09	1595.83	1001.81	3179.07	667.18	1390.22	1133.16	243147	7079.26	41591.4
486	M115T8	115.1	115	115.1	8.30007	7.83067	8.72123	26	0	0	1	4	0	0	0	0	0	0	2	0	1	0	0	0	4	4	4		9.42679e-05	7.04256e-06	3983.26	1440.54	2785.35	75283.2	1105.63	1341.91	1982.49	7586.46	3204.71	1311.9	16497	3283.44	8911.78	3884.7	1456.05	2653.57	27064.8	291617	49613.1
487	M207T29	207.1	207.1	207.1	29.0471	28.834	29.1165	5	0	0	0	0	0	0	0	0	0	0	0	0	0	0	0	0	0	0	4		9.43238e-05	7.04466e-06	18937.1	22232.9	19762.6	21086	20271.6	20155.2	19546.5	21219	22105.9	18165.9	20844.6	16367.5	17466.1	19132.8	22300.9	20788.1	19053.8	16291.4	55729.6
488	M229T24	229.1	229.1	229.1	24.3114	24.3071	24.3172	4	0	0	0	0	0	0	0	0	0	0	0	0	0	0	0	0	0	4	0		9.43288e-05	7.04485e-06	561.858	637.871	547.273	552.808	444.158	435.557	491.673	552.816	520.71	492.365	601.3	403.188	335.138	483.711	682.983	640.563	883.904	223235	333.543
489	M68T8	68.1	68.1	68.1	8.30677	8.05038	8.33488	20	1	0	0	4	0	0	0	2	1	0	4	1	0	0	0	0	2	4	1		9.50637e-05	7.07233e-06	17652.6	692.951	677.647	241266	1043.5	1188.32	1821.54	31367.1	10915.1	1918.88	116379	14960.7	2951.73	13701.9	1270.7	7306.64	32740.6	958486	6040.53
490	M91T9	91.1	91.1	91.1	9.16277	9.0327	9.57075	28	0	0	0	4	2	1	1	0	1	0	5	1	0	0	2	3	2	2	2		9.51188e-05	7.07438e-06	11435.4	35911.3	12421.1	80494	51976.7	33943.8	25301.4	23389.6	57406.9	9442.33	73564.8	26833.4	11882.6	8410.43	60590.5	131099	34718.4	30278.5	19085.7
491	M117T7_2	117.1	117.1	117.1	6.93425	6.92852	6.93618	4	0	0	0	0	0	0	0	0	0	0	0	0	0	0	0	0	4	0	0		9.55484e-05	7.09033e-06	11972.6	14061.5	9906.73	15299.3	12317.4	13310	13663.5	11503.4	12325.1	11825.2	13082.6	10136.7	13840.4	10289	13733.4	13099.3	27094.4	16670.8	22247
492	M152T17	152.1	152.1	152.1	17.3606	17.0121	17.373	5	0	0	0	0	0	0	0	0	0	0	0	0	0	1	0	0	4	0	0		9.59115e-05	7.10376e-06	921.838	735.181	346.594	6187.12	1117.29	581.663	1428.02	1122.73	938.18	341.667	2617.03	684.455	308.602	873.24	1685.7	2047.65	12646.8	948.771	1124.65
493	M143T16	143.1	143.1	143.1	16.1269	15.5378	16.5824	28	3	0	0	1	2	0	1	0	0	2	3	1	0	0	1	2	2	0	0		9.62596e-05	7.11658e-06	7250.22	487.538	1055.45	1721.08	7237.57	498.18	2270.35	918.526	710.084	5690.85	6243.04	2330.21	651.601	975.675	2096.2	9531.39	7397.63	1114.36	1314.06
494	M79T7_1	79.1	79	79.1	7.45468	7.43288	7.85658	33	0	0	1	1	1	0	4	0	0	2	0	2	1	0	1	0	5	2	5		9.64779e-05	7.1246e-06	6029.28	8904.76	10959.6	15089.7	11879.7	10364.5	144777	5982.25	7691.16	13252.9	19450.1	13755.8	31776.9	10057.7	18670.9	13586.6	2.39671e+06	46899.6	446681
495	M31T16	31	31	31.1	16.0755	15.7506	16.4508	13	0	0	0	0	0	0	0	0	0	0	2	0	0	0	1	0	0	3	3		9.65974e-05	7.12898e-06	16528.2	15242.9	14593.7	15745	15989.2	15218.1	15903.1	20152.7	15030.5	14563.9	25364.9	13383.8	13105.6	14799.2	20793.7	18012	13763.2	146751	19273.6
496	M62T7	62	62	62	6.93234	6.85828	7.14335	10	0	0	0	0	0	0	1	0	0	0	0	0	1	0	0	0	4	3	1		9.68063e-05	7.13663e-06	63.2477	86.1971	99.9886	226.338	110.093	124.409	1435.88	158.549	161.339	103.855	222.788	62.7498	3279.78	45.8241	1305.43	183.274	11711.4	5249.02	2328.71
497	M110T14	110.1	110.1	110.1	13.9274	13.62	14.1623	20	1	0	0	4	0	0	1	0	0	0	3	1	0	0	1	0	3	2	1		9.69223e-05	7.14087e-06	1522.98	412.081	513.072	70676.8	1187.16	371.944	1593.58	1012.42	737.08	419.347	5666.02	1175.88	717.41	311.781	8505.73	955.752	18780.6	3729.07	5060.97
498	M142T19	142.1	142.1	142.1	18.9288	18.9195	18.9381	2	0	0	0	0	0	0	0	0	0	0	0	0	0	0	2	0	0	0	0		9.72983e-05	7.15458e-06	272.098	269.804	552.122	566.383	355.424	172.8	209.431	205.26	424.309	228.682	472.809	668.295	191.303	348.316	21862.1	350.327	1350.56	594.724	203.272
499	M152T14	152.1	152.1	152.1	14.1514	13.8233	14.1741	7	0	0	0	0	0	0	4	0	0	1	0	0	0	0	0	0	1	0	1		9.76831e-05	7.16855e-06	623.344	113.777	224.244	329.813	192.505	111.534	24953.7	688.262	156.773	2130.54	903.417	268.095	557.583	35.4637	395.615	218.061	1825.45	578.458	2568.82
500	M123T25	123.1	123.1	123.1	24.7939	24.7796	24.8788	12	1	0	0	1	2	0	0	0	0	0	2	1	0	0	0	1	4	0	0		9.80506e-05	7.18184e-06	6869.68	4739.51	3449.6	7491.33	11162.7	3377.12	4493.08	4371.62	4973.54	3564.93	14596.8	4876.08	2391.04	3247.75	5846.07	9141.36	24031.3	5026.14	2764.33
501	M79T12_1	79.1	79	79.1	12.3433	12.0191	12.3604	19	1	0	0	3	0	0	0	2	2	0	5	1	0	0	1	0	0	3	1		9.80829e-05	7.18301e-06	15117	461.215	922.35	26554.1	999.377	1717.19	1061.88	13939.2	25391	4963.45	72910.6	5046.92	618.134	594.531	5508.17	9636.74	20002.6	64371.7	63252.9
502	M60T7_1	60	60	60	7.39331	7.20552	7.46798	6	0	0	0	0	0	0	0	0	0	0	0	0	0	0	0	0	1	0	5		9.85138e-05	7.19852e-06	3716.36	4767.49	4757.63	5130.84	4041.57	5732.55	4792.96	4260.16	5876.71	4537.59	4451.54	3385.98	5070.13	7869.65	6147.49	3598.39	3119.55	3563.51	273577
503	M106T16_1	106.1	106.1	106.1	16.1094	15.9539	16.1736	19	0	1	0	2	1	1	0	1	0	0	2	0	1	0	2	0	2	3	3		9.85683e-05	7.20048e-06	5013.69	6983.14	2012.15	7978.41	8574.17	6455.67	8768.27	11218.1	5785.91	839.339	15932.5	3327.8	2264.4	4093.11	14620.1	9045.01	5745.07	33031.6	10800.1
504	M155T16	155.1	155.1	155.2	16.1474	15.5417	16.5821	14	0	0	0	2	1	0	0	0	0	0	3	0	0	0	0	1	0	4	0		9.86747e-05	7.2043e-06	1429.27	508.349	576.089	1708.67	4893.14	324.316	1399.77	707.712	911.802	1006.17	5401.82	714.935	348.771	466.603	931.441	3215.95	1328.75	30923.5	578.85
505	M43T8	43.1	43	43.1	8.30147	8.05197	8.594	24	1	0	0	4	0	0	0	1	0	0	3	1	0	1	0	0	2	4	4		9.87228e-05	7.20602e-06	55097.9	9234.42	8801.69	609584	9149.12	15677	14438.9	90033.2	39988.8	8149.21	653984	30319.9	23000.7	40907.7	21637.5	35620.9	98960.5	1.70381e+06	211437
506	M85T13	85.1	85	85.1	12.77	12.3433	13.6585	120	4	3	4	4	3	4	4	3	4	3	5	4	3	4	3	3	5	4	5		9.98216e-05	7.24519e-06	140089	157446	166935	171895	166299	158947	153891	150407	136341	138706	179912	134016	122556	137161	213109	181423	131369	133888	204310
507	M99T13	99.1	99.1	99.1	12.7699	12.364	13.1966	79	4	2	4	4	3	4	4	3	1	2	5	4	2	3	2	3	5	3	2		0.00010017	7.25753e-06	26712.6	24566.3	26486.5	28122.5	21802.8	25276.4	25336	27375.5	20829.8	21268.7	76283.6	18041.7	20077.8	21834.1	33813.8	29442.7	22154.2	21143.3	40187.5
508	M137T18	137.1	137.1	137.1	18.0156	18.0094	18.1379	4	0	0	0	2	0	0	0	0	0	0	0	0	0	0	0	0	1	1	0		0.000100385	7.26512e-06	672.976	284.775	401.549	21494	738.229	229.304	534.082	368.928	444.866	325.483	1241.24	482.876	202.166	295.086	989.584	643.907	6483.01	1650.17	620.095
509	M110T13	110.1	110.1	110.1	13.0937	12.7849	13.1943	21	1	0	1	4	2	0	0	0	1	1	0	1	0	0	0	0	4	0	4		0.000100395	7.26544e-06	3756.65	368.906	2139.87	142574	7174.23	339.59	1480.93	4508.6	2587.66	2959.99	6945.9	2983.18	4277.93	324.644	2514.71	1879.44	11776.6	941.212	8688.57
510	M94T13	94.1	94	94.1	13.0937	12.7848	13.2523	28	0	0	1	4	2	0	0	2	2	0	2	2	0	0	1	1	5	0	0		0.000100985	7.2862e-06	1834.92	155.465	10075.2	1.11298e+06	36691.6	425.751	686.03	21367	15499.2	363.501	13375.6	17010.4	4074.97	135.776	9548.59	3912.83	38039.7	1245.58	2443.71
511	M71T16	71.1	71.1	71.1	16.2837	15.8115	16.2964	38	3	0	2	3	3	0	1	1	0	1	3	1	0	1	0	3	1	4	0		0.00010113	7.29127e-06	76625.8	13862.3	21908.2	60384.3	169432	9890.2	52716.5	21204.8	26190.5	50902.8	93296.8	31851.8	12467.1	15130.7	24552.4	147540	51144.9	1.48221e+06	23566.2
512	M69T13	69.1	69.1	69.1	12.7698	12.2925	13.4434	142	4	3	4	4	3	4	4	3	4	3	5	4	3	4	3	3	5	4	5		0.000101457	7.30267e-06	155830	173581	185220	246890	184291	176049	169711	169216	153953	154507	205390	149161	139831	149954	236030	201318	274038	174385	221277
513	M39T8	39	39	39.1	8.30493	7.83448	8.6531	53	4	0	1	3	0	1	2	3	3	1	5	2	2	3	0	2	5	4	5		0.000101593	7.30742e-06	64959.1	6058.46	6946.02	128231	6963.22	9780.48	12361.2	97576.4	43798.7	9620.37	332423	40995.4	18863.6	57080.2	9402.3	34360.9	104813	2.12833e+06	399727
514	M43T12	43.1	43	43.1	11.6966	11.5754	11.9445	13	0	0	0	3	0	0	0	0	0	0	0	0	0	0	0	0	0	2	4		0.000102144	7.32653e-06	10217.3	5585.73	10391.5	59689.8	13404.8	6054.21	11864.7	10176.4	23702.8	4345.82	15379.8	3597.65	9579.8	6273.26	10619.7	57155	15210	163621	871099
515	M61T16	61	61	61.1	16.102	15.8194	16.647	12	0	0	0	0	0	0	0	2	0	0	3	0	1	0	1	1	0	2	1		0.00010237	7.33435e-06	1232.07	988.904	795.885	1067.53	1305.2	971.808	1259.76	4607.08	872.96	877.018	7452.71	791.511	2310.8	876.322	2700.4	3299.93	909.644	107029	6099.78
516	M122T16	122.1	122.1	122.2	16.4613	15.9539	16.9227	26	4	0	0	3	0	0	1	1	0	2	2	1	1	0	1	0	1	4	5		0.00010256	7.3409e-06	31088.2	261.031	1282.79	11908.6	1134.3	919.328	2167.7	6598.03	1306.92	9679.29	15163	3932.63	20527.3	1059.26	6866.7	860.496	5418.5	306187	280733
517	M80T7_1	80.1	80	80.1	7.45279	7.43288	7.84178	24	0	0	0	0	0	1	3	0	0	0	1	0	1	0	0	0	5	2	5		0.000102939	7.35397e-06	2168.37	2465.79	4801.66	6372.3	3701.53	3761.67	58284.4	1760.88	2408.04	3051.75	7228.42	3567.42	11273.6	2538.8	8103.97	5600.05	990431	19651.1	182808
518	M65T11	65.1	65	65.1	11.0954	10.9171	11.1516	7	0	1	0	0	1	0	0	0	0	0	0	0	0	0	0	0	0	0	4		0.000103527	7.37409e-06	554.738	1077.07	195.707	1122.62	897.241	546.871	774.996	671.789	367.728	365.048	1106.83	285.978	357.94	319.815	942.242	486.78	546.181	3543.11	1.09155e+06
519	M78T8	78.1	78	78.1	8.30745	8.24325	8.7472	26	1	0	1	4	0	0	0	2	1	0	5	1	0	2	0	0	2	4	1		0.000103753	7.3818e-06	24222.7	2765.46	4522.69	362215	4498.85	4740.55	4352.55	47755.8	19179.3	3121.29	1.07095e+06	16648.6	3861.15	27050	13865.7	13025.7	49840.1	1.30031e+06	10335.6
520	M133T12_1	133.1	133.1	133.1	11.618	11.0897	11.7819	17	0	0	0	4	0	0	0	0	0	0	0	1	0	0	0	0	5	1	1		0.000103753	7.3818e-06	7125.5	6278.8	5941.23	43681	5819.05	6661.9	6150.65	6538.06	8287.07	5460.99	6985.54	8843.44	6398.97	5551.04	11536.4	7810.71	54037.9	7592.29	18918.2
521	M129T9	129.1	129.1	129.1	9.0098	8.9865	9.08622	5	0	0	0	0	0	0	0	0	0	0	0	0	0	0	0	0	0	0	5		0.00010382	7.38408e-06	457.092	1013.89	493.858	835.391	499.573	618.505	733.319	651.096	681.326	407.568	933.799	586.744	442.446	396.654	844.611	627.157	702.353	518.235	178722
522	M148T14	148.1	148.1	148.1	13.8801	13.6823	13.9698	7	0	0	0	0	0	0	0	0	1	0	1	1	0	0	2	0	0	2	0		0.000103924	7.38761e-06	482.438	229.446	348.326	166818	957.671	449.561	807.047	965.388	4406.58	345.177	3461.9	1822.46	187.329	300.994	18366	1045.24	3904.75	3820.54	1550.22
523	M149T19	149.1	149.1	149.1	18.7139	18.706	19.1184	7	1	0	0	3	0	0	0	0	0	0	0	0	0	0	0	0	1	0	0		0.000105156	7.42926e-06	1538.45	755.228	741.78	19338.5	1157.96	434.802	866.824	723.065	1018.38	460.652	2273.57	680.479	354.599	484.107	7927.8	1516.65	2780.07	5947.46	723.393
524	M140T12	140.1	140.1	140.1	11.902	11.572	12.6679	14	0	0	0	0	0	0	0	0	0	0	0	0	0	0	0	1	1	1	5		0.000105343	7.43553e-06	1446.79	202.008	250.336	1253.26	1064.9	121.985	942.471	663.232	394.339	278.434	1736.8	843.171	214.893	454.549	1930.22	3898.95	1324.46	927.304	8.25511e+06
525	M93T13	93.1	93	93.1	13.0887	12.7581	13.4378	41	1	0	2	4	2	1	1	3	3	0	1	2	1	0	3	1	5	1	3		0.00010564	7.44546e-06	10505.6	270.231	47816.1	5.03149e+06	170699	1871.48	3469.09	102232	76470.8	902.82	54317.2	82132.5	20705.6	378.456	48535.8	21731.3	231230	9937.41	30080.3
526	M147T19	147.1	147.1	147.1	18.7059	18.0094	19.2283	21	2	1	0	3	2	0	0	0	0	0	0	0	0	0	3	0	3	1	0		0.000105854	7.4526e-06	6311.5	9102.7	3886.1	40131.4	9469.45	5500.64	6056.03	6901.61	7146.44	4208.89	7742.81	4468.22	2393.01	3199.78	26474.7	5222.24	17012.4	3567.62	3370.07
527	M104T21	104.1	104	104.1	21.2172	20.8984	21.2649	61	3	3	3	4	2	4	4	3	4	2	5	2	2	3	3	3	3	3	3		0.000106162	7.46285e-06	36209.9	96025.2	39261.7	66839.6	56672.7	50248.2	54998.5	53437.3	53634.7	32618.3	78530.6	31079.3	27970.8	34942.1	76870.6	63425.2	34105.1	49009.3	50125.7
528	M108T18	108.1	108	108.1	18.1493	17.7414	18.4447	16	1	0	0	2	1	0	1	0	0	1	1	1	0	0	0	0	2	3	0		0.000106694	7.48052e-06	4288.77	330.009	354.377	20328.8	4872.24	340.99	1604.84	3729.37	837.082	4050.11	5320.73	1534.45	967.876	419.643	1510.92	3202.38	7213.72	43110.7	5973.29
529	M96T14	96.1	96	96.1	14.0656	13.6991	14.4281	22	0	0	0	4	0	0	3	0	0	2	1	0	1	0	1	0	4	2	0		0.00010702	7.49128e-06	1501.33	407.953	685.193	50699.7	1180.93	296.332	49752.3	1149.23	723.591	5047.97	5174.11	593.53	2045.53	1836.31	12634.3	1555.1	23578.4	14011.4	4328.15
530	M105T18	105.1	105	105.1	18.0181	17.978	18.1303	8	0	0	0	4	1	0	1	0	0	0	1	0	0	0	0	0	1	0	0		0.000107357	7.50235e-06	3816.72	1892.71	1340.66	80383.9	12131.3	1404.41	5186.78	1635.88	2906.68	1919.96	24352.6	2024.8	1051.21	1087.26	5819.61	9620.58	19439	6663.45	2766.71
531	M69T18	69.1	69.1	69.1	17.8593	17.4024	18.4447	30	0	0	0	4	2	0	0	0	0	0	4	0	0	3	0	1	1	4	1		0.000107382	7.50319e-06	4828.91	2054.1	2718.73	113959	9136.2	1775.83	3618.02	3743.08	4608.44	2096.66	24152.3	4254.47	1597.98	29535.6	4598.5	8446.64	10511.5	139560	5934.66
532	M43T14_2	43	43	43	13.6356	13.6227	13.6808	8	0	0	0	0	0	0	0	0	0	0	3	0	0	0	3	0	2	0	0		0.000108077	7.52593e-06	31109.4	30490.3	27947.5	36301.6	34725.8	29865.3	32685.3	31539.4	28269.3	28917.2	120242	28234.2	28095.8	28349.5	228199	34595	62196.1	27979.9	61183.8
533	M95T16	95.1	95.1	95.1	16.0085	15.9539	16.3836	11	1	0	0	0	0	0	1	0	0	0	0	0	0	0	0	0	1	3	2		0.000108283	7.53265e-06	8952.35	1127.4	1871.19	2851.34	5816.52	1136.88	6339.35	3438.99	1603.35	2431.55	9802.02	2704.32	1299.2	877.224	2691.11	6515.48	9204.57	828878	23478.8
534	M112T8	112.1	112	112.1	7.62387	7.567	7.94322	12	0	0	0	0	0	0	1	0	0	0	1	0	1	0	1	1	1	3	0		0.000108482	7.53913e-06	2069.2	455.264	397.31	727.148	869.742	1306.21	2717.57	460.724	501.202	496.077	2216.83	824.796	9749.77	555.009	5283.44	2833.78	10688.5	13859.9	333.094
535	M109T18	109.1	109.1	109.1	18.0132	17.7225	18.4447	27	0	0	1	4	3	0	1	0	0	0	4	0	0	2	0	0	3	4	0		0.000108923	7.55343e-06	1814.93	948.976	1789.36	84845.9	21972.1	909.405	4906.99	1738.79	1258.11	1309.09	10572.2	1325.58	1064.19	4040.54	2326.64	2461.31	38447.6	181125	2221.17
536	M122T10	122.1	122.1	122.1	10.3886	9.8074	10.935	17	0	0	0	2	0	0	0	0	0	0	0	0	2	0	1	0	3	3	2		0.000109119	7.55977e-06	141.083	106.401	74.2889	2579	164.911	146.659	206.187	162.795	108.493	135.74	347.286	85.0532	116949	82.5072	1162.82	151.575	7116.02	11335.4	5698.05
537	M135T15	135.1	135.1	135.1	14.8663	14.6754	15.2229	14	3	0	0	0	0	0	0	0	1	0	1	1	0	0	0	2	1	3	2		0.000109177	7.56162e-06	7886.44	531.316	687.661	38364.4	1491.45	508.703	955.436	1578.3	4845.03	526.027	16346.8	4842.31	586.839	409.544	3086.24	6112.33	7623.21	138053	5483.8
538	M147T13	147.1	147.1	147.2	13.0854	12.7318	13.4005	35	1	0	2	4	1	1	1	3	1	0	1	3	1	0	2	2	5	2	0		0.000109851	7.58332e-06	3877.73	1175.75	16906.4	1.29504e+06	53697.6	2117.61	1914.08	36405.3	21538.2	1057.32	2732.13	28807.3	7586.9	800.361	16533.6	7836.79	307920	3548.65	2141.04
539	M51T9	51	51	51	9.16275	8.88517	9.57478	31	0	0	1	4	2	0	1	2	2	0	5	1	0	1	2	3	2	0	2		0.000109976	7.58734e-06	27935.6	42879.5	34829.4	58261.6	43103.7	34410.6	47192.9	50841	58003.1	30921.3	55743.9	32101.1	23747.6	32053.7	46389.6	68694.3	34608	30156.5	49174.8
540	M38T7_1	38	38	38.1	6.93233	6.93138	7.10407	5	0	0	0	0	0	0	0	0	0	0	0	0	1	0	0	0	2	2	0		0.000109988	7.58771e-06	1276.71	1377.18	1390.84	2380.18	1591.92	1696.46	2897.33	1621.79	1396.46	1296.72	1747.96	1065.08	2869.8	1222.03	2278.75	2026.54	15393.8	9781.5	2985.4
541	M53T19	53	53	53	18.7139	18.4447	18.9281	5	0	0	0	2	0	0	0	0	0	0	0	0	0	0	2	0	0	1	0		0.000112034	7.67749e-06	1491.69	987.906	736.636	9274.91	1257.47	878.737	1029.69	1288.22	1109.04	865.596	1907.37	881.271	730.917	1363.32	5853.93	1029.63	1860.95	22657.5	903.53
542	M111T18	111.1	111.1	111.1	18.0142	17.962	18.017	3	0	0	0	2	0	0	0	0	0	0	0	0	0	0	0	0	1	0	0		0.000112291	7.68871e-06	1829.43	1520.04	1341.46	18575.9	3012.73	1068.69	2273.17	1654.17	1917.99	1178.41	3941.29	1267.59	801.809	975.323	2099.12	2949.25	5198.76	3735.83	3316.71
543	M137T12	137.1	137.1	137.1	12.0124	11.9754	12.365	10	1	0	0	0	0	0	0	0	0	0	0	0	0	0	0	0	5	1	3		0.000112934	7.71664e-06	593.297	47.1062	33.3288	202.438	126.578	99.3709	297.759	144.466	125.668	21.1701	463.891	31.0464	517.105	114.122	270.985	260.606	17744.9	2686.75	50360
544	M79T18	79.1	79.1	79.1	18.0156	18.0094	18.1379	4	0	0	0	3	0	0	0	0	0	0	0	0	0	0	0	0	1	0	0		0.000114298	7.77548e-06	2311.29	2805.62	1240.63	65551.1	2634.21	1912.97	4160.62	2065.36	2827.97	1170.38	5283.57	2949.64	846.43	1545.22	5405.53	10480.7	15290.9	11794.2	7048.89
545	M205T14	205.2	205.2	205.2	13.9032	13.5207	14.0049	9	0	0	0	3	0	0	0	0	1	0	1	0	0	0	2	0	1	0	0		0.000114623	7.78947e-06	62.4988	36.2628	111.138	82402	210.531	39.2186	113.764	414.685	934.444	25.0962	715.358	227.577	129.516	13.8444	84957.4	146.043	5590.43	378.086	222.691
546	M189T15	189.2	189.2	189.2	14.7043	14.3366	14.9628	18	1	0	0	4	1	0	0	0	1	0	1	1	0	0	0	1	5	3	0		0.000114672	7.79156e-06	6166.23	48.459	67.6076	190771	2784.45	37.1858	58.3267	206.42	8128.6	47.6551	4086.4	7037.41	45.0563	37.4981	21364.9	1447.25	64347.9	93633.8	241.413
547	M135T13_1	135	135	135	12.7698	12.7651	12.7761	72	4	3	4	4	3	4	4	3	4	3	5	4	3	4	3	3	5	4	5		0.000115568	7.82984e-06	431350	510355	525404	540593	510771	491752	466446	460905	430272	441524	550227	424639	378354	427253	674245	552140	407899	422077	710882
548	M94T16	94.1	94	94.1	15.5221	15.4626	16.3908	17	0	0	0	0	0	0	0	0	0	1	5	2	0	0	0	0	0	4	2		0.000115827	7.84089e-06	1261.47	338.017	616.044	2136.39	908.775	291.351	1125.71	1642.13	1112.71	6583.87	28630.6	5157.85	254.148	567.372	667.204	1242.42	6041.02	255534	6554.07
549	M117T19	117.1	117.1	117.1	18.8109	18.7059	18.9381	6	0	0	0	2	0	0	0	0	0	0	0	0	0	0	2	0	0	0	0		0.000117705	7.92031e-06	13023	16714.8	12465.9	25128.3	14014.8	14400.3	13218.4	13643.7	14423.2	12818.3	16613.5	10855	10989.1	11941.7	56259.5	13823.6	11197.5	12722.1	14690.9
550	M106T8	106.1	106.1	106.1	8.30875	7.82593	8.42832	41	3	0	0	4	0	1	1	3	2	0	5	1	1	3	1	2	3	4	0		0.000119025	7.97556e-06	27078.4	174.824	416.603	406990	311.646	2144.39	3390.14	46726.6	17750.5	2189.65	100732	15989.2	7649.47	23989.7	9698.21	11540.1	50317.8	1.54669e+06	2141.58
551	M66T16	66.1	66	66.1	15.9953	15.8299	16.447	5	0	0	0	0	0	0	0	0	0	0	0	0	0	0	0	0	0	3	1		0.000120696	8.04483e-06	766.802	153.323	92.4455	316.319	412.484	111.936	601.977	522.606	153.887	199.424	773.078	233.304	151.36	149.451	202.756	313.905	659.312	165500	2516.82
552	M55T12	55.1	55.1	55.1	11.6881	11.0642	12.0399	30	2	0	2	3	1	0	0	0	1	0	3	0	0	0	0	2	2	1	5		0.000121344	8.07152e-06	22165.6	3581.94	10472	62253.6	20188.9	4177.16	8813.89	8701.48	19876.3	4208.83	41320.2	4069.56	7889.71	5460.23	6640.68	51762.9	46883.9	22531.1	2.07885e+06
553	M138T12	138.1	138.1	138.1	12.3498	12.1354	12.36	5	0	0	0	0	0	0	0	0	2	0	0	0	0	0	2	0	0	0	1		0.000121721	8.08697e-06	158.716	15.0088	39.0837	181.843	42.8506	46.3327	86.9371	269.703	1882.45	38.1951	3491.09	11.4143	96.397	0	29808.5	155.627	239.542	229.869	5382.83
554	M62T15	62	62	62	15.2317	14.9642	15.2437	5	0	0	0	0	0	0	0	0	0	0	0	0	0	0	0	1	0	4	0		0.000122611	8.12334e-06	153.295	92.7431	82.4811	146.435	283.654	87.4388	137.36	144.852	120.196	132.758	224.705	82.7278	35.0643	109.418	77.0786	2036.76	848.629	106512	863.284
555	M68T14	68.1	68	68.1	13.9515	13.8732	14.3118	15	0	0	0	4	0	0	2	1	0	0	0	0	0	0	1	0	1	2	1		0.000123063	8.14173e-06	679.563	301.314	465.62	399601	1086.26	237.241	28017.2	3295.41	1212.5	609.522	2578.51	1697.38	4186.4	329.036	15932.5	1102.3	9271.15	8025.23	4050.16
556	M39T23	39	39	39	23.0949	23.0824	23.3041	4	0	0	0	0	0	0	0	0	0	0	0	0	0	0	0	0	1	3	0		0.000124148	8.18569e-06	7629.16	8903.12	7582.94	8741.76	7677.31	7919.87	7925.32	8773.18	8578.68	6723.6	9106.32	6417.57	5707.96	6906.62	9408.89	8084.54	13919.4	50105.1	3831.92
557	M117T11	117.1	117.1	117.1	11.0976	10.675	11.7819	108	2	3	3	4	3	4	4	3	3	0	5	3	1	3	3	3	5	4	5		0.00012422	8.18858e-06	17047.3	42414.9	17146.5	37864.7	32240.1	34657.9	40892.4	36391.7	36033.7	6661.23	42693.9	18543.3	16240	20381.4	39877.8	34441.4	23448.4	35383.3	192955
558	M124T12	124.1	124.1	124.1	12.114	11.6118	12.1958	8	0	0	0	3	0	1	0	0	0	0	1	0	0	0	0	0	1	0	1		0.000124868	8.21468e-06	231.525	154.166	132.382	9144.1	264.924	2699.08	318.851	3888.32	8445.88	520.22	719.186	204.359	591.064	66.945	407.294	306.3	7489	304.924	6909.75
559	M105T8	105.1	105.1	105.1	8.19055	7.43498	8.42832	82	4	0	2	4	1	2	3	3	2	1	5	1	1	3	1	2	5	4	5		0.000124945	8.21778e-06	113048	2441.16	19693.7	1.59841e+06	8340.21	25845.5	44317.3	189921	73023.7	10672.9	618593	66497.7	92330.7	100933	34958.7	51087.8	366490	5.37658e+06	36695.9
560	M121T16	121.1	121.1	121.1	15.9913	15.7996	16.3871	31	4	0	1	1	1	0	1	1	0	2	4	1	0	0	0	2	4	4	3		0.000125271	8.23085e-06	14660.1	872.87	2408.37	3618.79	6739.02	1821.05	8791.22	5173.15	1754.33	4715.94	10108.5	4197.23	1925.45	841.778	2492.64	9918.9	13264.6	2.7727e+06	15461.4
561	M111T14	111.1	111.1	111.1	13.7289	13.5864	13.8996	10	1	0	0	3	0	0	0	0	0	0	0	0	0	0	1	0	2	1	1		0.00012558	8.24321e-06	4043.18	999.196	1134.81	71469.3	3663.38	825.01	2747.49	1634.32	1674.35	1333.74	5933.1	1522.29	1611.13	886.096	7367.8	3611.4	9681.1	3988.7	18496.2
562	M92T12_1	92.1	92.1	92.1	12.3578	12.3405	12.365	14	2	0	0	1	0	0	0	0	0	1	5	0	0	0	0	0	1	4	0		0.000125739	8.24958e-06	21506.8	93.2046	1885.17	6344.22	184.145	4182.08	419.344	5920.59	2130.14	5346.12	97679.1	2490.74	144.826	423.281	1290.01	11198.9	6781.94	84594.7	1642.36
563	M125T11_1	125.1	125.1	125.1	11.1078	11.0479	11.3284	7	0	0	0	0	0	0	0	0	0	0	0	0	0	0	0	0	2	0	5		0.00012682	8.29262e-06	1362.05	401.253	438.074	858.545	676.846	461.421	1238.14	1068.95	519.494	526.982	2499.3	301.259	1577.62	337.776	1419.58	1365.83	4794.65	585.55	3.80932e+06
564	M97T25_2	97.1	97.1	97.1	24.7185	24.3145	24.7758	5	0	0	0	0	0	0	0	0	0	0	1	0	0	0	2	0	1	0	1		0.00012731	8.31205e-06	9022.9	15789	7410.08	16374.5	7961.56	9068.33	9047.57	12845.4	12142.7	5118.66	20767.3	6306.08	3516.91	7924.23	25127.8	10226.5	13716.8	7135.23	8274.1
565	M81T11	81.1	81	81.1	11.1786	10.9067	11.3306	22	1	0	0	3	0	0	1	1	1	1	1	1	0	0	2	1	3	0	3		0.00012756	8.32194e-06	7515.21	2233.74	1457.3	17967.4	4863.79	2238.74	8428.73	11476.5	15322.3	7341.91	12552.6	2560.18	8488.57	967.428	10832.5	7568.34	60723.7	2833.85	174791
566	M66T13	66.1	66	66.1	13.067	12.6679	13.1158	8	0	0	0	4	0	0	0	0	0	0	0	0	0	0	0	1	0	0	2		0.000127732	8.32873e-06	658.391	165.654	1174.03	161312	3554.3	155.176	282.201	1656.32	1367.16	118.937	1896.36	1805.76	757.153	75.9628	895.599	793.678	1962.48	234.865	127504
567	M163T39	163.1	163.1	163.1	39.4433	38.856	39.7481	13	0	2	0	0	0	0	0	0	0	0	0	0	0	0	1	1	1	0	0		0.000128127	8.3443e-06	20242.5	25210.6	21005.9	23946.7	21495.9	22521.7	21759.5	22699.8	24396.3	20630.9	25151.5	17851.3	18454.9	21316	26842.6	20819.8	20780.7	18082.9	20961.1
568	M128T15_1	128.1	128	128.1	14.5466	14.2544	14.706	9	0	0	0	2	0	0	0	0	1	1	0	0	0	0	1	0	3	0	1		0.000128762	8.36925e-06	329.014	269.449	326.961	17388.4	549.128	226.398	319.782	729.877	1743.18	1425.25	664.37	221.304	247.918	236.865	4393.14	319.657	15946.9	595.432	11777.9
569	M41T8	41.1	41	41.1	8.31255	8.05038	8.64097	21	1	0	0	4	0	2	1	0	0	1	3	2	0	1	0	0	0	4	1		0.000129478	8.39726e-06	69087.6	2581.26	2210.49	1.04754e+06	5121.11	18066.6	16510.8	117389	40120	12132.3	518736	16593.1	6462.78	57089.9	5645.74	20706.8	93693.6	3.54297e+06	89232.3
570	M136T10	136.1	136	136.2	10.1007	10.0585	10.4066	11	0	0	0	1	0	0	0	0	0	0	1	0	0	1	0	0	1	4	0		0.000129579	8.40121e-06	643.671	45.7396	566.677	15525.1	298.691	111.819	179.709	594.108	584.808	111.624	2548.81	231.456	248.705	328.841	234.002	434.03	8603.04	57785.5	546.611
571	M44T9_2	44	44	44	8.88662	8.82832	8.8959	20	3	0	0	0	1	0	2	1	0	2	3	1	1	0	0	3	2	0	1		0.000129628	8.40315e-06	38701	40537.1	30749.1	38333.9	38965	32958.9	41608.2	38985.8	36073.9	34540.4	60254.7	30338.4	31831.4	29728.3	37878.5	41730.7	36418.4	29541.1	43283.6
572	M43T37_1	43	43	43	36.5532	36.069	37.1174	41	0	0	1	0	0	0	1	0	0	0	0	3	1	2	0	0	3	0	0		0.000130678	8.44397e-06	557548	697443	722358	631989	578905	615045	678891	609441	676186	549373	639770	517679	500381	652070	640393	604746	431371	501906	427049
573	M91T13	91.1	91	91.1	13.0936	12.801	13.3375	30	0	0	1	4	3	0	0	3	3	0	1	2	2	0	0	0	5	3	1		0.000132159	8.5011e-06	4066.25	521.306	35053.8	3.67362e+06	127940	2009.97	2127.89	76120.5	57901	892.453	40656.2	59182.1	15757.2	614.582	30156	13841.6	526074	85284.3	12591.7
574	M168T16	168.1	168.1	168.1	16.2482	15.858	16.3126	6	0	0	0	0	0	0	0	0	0	0	0	0	0	0	0	0	0	4	0		0.000133415	8.54919e-06	58.3165	27.7948	18.133	160.968	106.027	30.0326	48.5054	43.1977	53.8385	30.4104	303.204	19.9019	94.7671	16.5175	63.0627	232.598	515.711	26721.7	264.245
575	M91T32	91.1	91.1	91.1	32.2181	31.7606	32.8434	65	1	2	4	4	2	4	4	2	4	2	5	0	0	2	3	3	2	2	0		0.000134192	8.57875e-06	53689.3	114145	81954.4	96156.1	103193	99471.4	95484.1	93867.9	107045	61319.4	115794	25637.5	26993.4	67015.6	123795	100788	71130	66373.5	26059.8
576	M67T10	67.1	67	67.1	10.1358	9.8074	10.646	29	0	0	0	2	1	1	1	3	0	0	2	1	0	0	1	1	5	4	3		0.000134869	8.60437e-06	19184.2	855.847	10776.2	205502	22534.2	23024.4	20488.7	66520.3	19066.2	2984.46	39852	10723.1	19225.5	947.267	14674.9	9708.08	487975	282769	216634
577	M70T10	70.1	70.1	70.1	10.4057	10.1007	10.8174	66	4	2	2	4	2	1	2	3	1	3	5	2	2	0	3	3	4	4	5		0.000134915	8.6061e-06	30800.2	12572.8	14423	35988.8	31720.7	9516.79	33649.3	22262.9	8988.5	32774.8	66234	14880.1	16895	7427.01	20899.9	47630.3	30134.2	35740.4	160097
578	M70T9	70.1	70.1	70.1	9.16279	8.70675	9.8074	64	3	0	1	4	3	1	1	0	4	2	5	1	2	0	2	2	5	2	5		0.000135118	8.61376e-06	24338.5	2418.16	5615.11	79028.1	40898.1	6088.23	12594.3	10962.1	66352.1	22646.5	79606.4	32613.9	18489.2	2660.18	29992.1	139277	37958.5	10260.2	3.5801e+06
579	M82T10	82.1	82	82.1	10.3971	9.8074	10.4342	77	4	1	2	4	3	3	4	3	3	3	5	1	3	2	3	3	5	4	5		0.000135261	8.61915e-06	35119.2	9319.62	7959.37	114235	29296.5	13005.7	28048.9	39677	13115.6	31304.6	54452	16146.2	11967.7	14399.5	19741.6	31047.8	157676	153840	558025
580	M123T12_2	123.1	123.1	123.1	11.5908	10.9312	11.618	11	2	0	0	2	0	0	0	0	0	0	0	0	1	0	1	0	5	0	0		0.000135494	8.62794e-06	1641.43	157.28	129.468	16138.3	152.972	138.522	408.808	203.539	158.463	96.0659	381.031	117.943	10747.8	118.013	4818.99	580.452	9537.92	202.729	2938.73
581	M136T18	136.1	136.1	136.1	17.8556	17.8267	18.1379	15	0	0	0	2	1	0	0	0	0	0	1	0	0	3	3	1	1	2	1		0.000135703	8.6358e-06	772.681	625.147	489.862	6581.81	2428.28	422.081	929.018	753.547	1332.07	573.582	10416.3	747.372	451.868	7865.89	7846.36	5189.35	3149.88	12099.9	3568.92
582	M80T12_2	80.1	80.1	80.1	11.604	11.4431	11.7513	6	0	0	0	1	0	0	0	0	0	0	0	0	0	0	0	0	2	0	3		0.000136241	8.656e-06	569.591	231.439	163.313	32461.2	261.126	178.688	317.351	410.972	474.798	212.113	468.888	169.942	227.32	350.112	3397.64	425.046	7051.37	2731.37	80831.3
583	M43T33	43	43	43	33.2819	32.9196	33.7092	25	1	0	0	0	0	0	0	0	0	0	0	3	0	1	0	0	3	0	0		0.000136426	8.66293e-06	512609	525367	441430	495560	455715	481509	459554	457422	509222	408192	484477	398046	375155	437939	458416	455743	524784	371597	329251
584	M111T8_1	111.1	111.1	111.1	8.24126	8.0469	8.27455	10	1	0	0	0	0	0	0	0	0	0	5	0	0	0	0	0	0	0	4		0.000138073	8.72427e-06	3748.98	2174.15	1125.33	2713.7	1497.88	2230.15	4410.57	1802.71	2126.95	1155.5	193987	1230.11	6465.14	1052.3	5756.42	3516.53	13754.3	980.727	11401.9
585	M268T12	268	268	268	12.1361	12.1049	12.1443	16	1	0	1	1	2	0	0	0	0	1	2	1	0	1	0	2	1	3	0		0.000138089	8.72487e-06	4539.1	1036.6	2393.17	1383.63	3535.53	1289.81	1745.14	1897.83	1453.97	2959.05	2566.68	2278.06	2369.18	2288.28	781.233	4356.88	3423.93	4060.45	2579.42
586	M95T17_1	95.1	95.1	95.1	17.404	17.3855	17.4564	8	0	0	0	4	0	0	0	0	0	0	0	0	0	0	0	0	2	0	2		0.000139	8.75855e-06	5418.59	1715.72	2581.38	196090	8439.46	1250.18	5060.47	5005.95	2493.81	3529.58	15001.3	5696.85	1496.58	1386.7	6685.27	16503.8	21659.7	7282.19	14719.7
587	M125T15	125.1	125.1	125.1	14.6695	14.5609	14.6994	4	0	0	0	0	0	0	0	0	0	2	1	0	0	0	0	0	0	1	0		0.00013906	8.76076e-06	1274.89	564.194	761.517	2590.2	2193.17	699.752	1590.23	1562.36	933.555	6047.25	5064.17	953.962	1014.21	725.948	2152.98	2023.78	1213.17	3536.44	5122.9
588	M151T13	151	150.9	151	12.7699	12.3749	12.7761	73	4	3	4	4	3	4	4	3	4	3	5	4	3	4	3	3	5	4	5		0.000139516	8.77755e-06	61697.3	73288.9	75183.8	78051.8	73375.4	70355.7	66400.6	65989.9	61574.5	62987.4	79440.4	60392.1	54452.1	60813.6	97034.5	79506.7	60106.9	60320.6	101487
589	M122T13	122.1	122.1	122.1	13.0835	12.6781	13.1158	23	0	0	0	4	2	0	0	1	1	0	2	2	0	0	1	1	4	0	1		0.000140058	8.79742e-06	917.489	114.643	3886.37	297861	16568.7	289.835	313.972	8537.88	6484.92	139.123	5597.23	7794.27	1782.61	58.6044	5983.72	2100.56	35078.7	792.171	10537.7
590	M84T8_1	84	84	84.1	8.24123	7.93575	8.54135	13	0	0	0	0	0	0	0	0	0	0	3	0	1	0	0	0	1	0	3		0.000140999	8.83179e-06	0	0	0	0	0	0	0	0	0	0	243838	0	46607.9	0	0	0	31734.7	0	280484
591	M111T10_2	111.1	111.1	111.1	10.2283	10.093	10.5501	16	2	0	0	0	0	0	0	0	0	0	1	0	1	0	0	0	5	0	5		0.000143059	8.90636e-06	2435.33	354.047	458.96	974.588	390.193	558.441	1559.62	535.076	438.65	394.964	2088.15	465.64	3442.58	392.414	1246.29	837.319	25367.5	322.794	502918
592	M121T12_1	121.1	121.1	121.1	12.3584	12.11	12.5541	38	3	0	1	2	0	2	0	3	2	1	5	2	0	0	1	2	5	4	1		0.000144676	8.96427e-06	36716	296.092	3626.2	15922.4	660.342	7398.59	1384.37	12495.5	10997.7	9292	157368	4595.06	812.438	1058	4442.48	21216.4	18350.7	137240	6136.57
593	M110T11	110.1	110.1	110.1	11.2552	11.0463	11.3338	13	0	0	0	1	0	1	0	0	0	0	0	0	1	0	0	0	4	2	3		0.000145042	8.97731e-06	2099.26	564.183	578.52	1304.83	1699.92	2242.35	2023.92	3872.78	471.859	4751.17	3386.68	543.865	3696.73	602.691	952.751	1667.67	8604.3	3865.07	14788
594	M134T16_1	134.1	134.1	134.1	16.1096	16.1019	16.5824	66	3	3	3	4	3	4	4	3	4	0	5	4	1	3	3	3	5	3	5		0.000146028	9.01229e-06	24378.9	39317.4	14998.7	38984.2	40331	35509.6	45906.2	40278.9	30885.3	4291.45	47643.1	20008.1	12597.9	22163.2	47876.8	46269.3	30905.1	19299	47652.7
595	M43T39_1	43	43	43	38.7187	38.2154	39.1228	31	0	0	0	0	0	0	0	0	0	0	0	3	0	2	0	0	5	1	0		0.000146051	9.0131e-06	515284	664870	555614	607123	539217	580933	573941	591938	618365	500686	630245	607170	452711	666247	600559	560692	341495	508058	410829
596	M77T24	77.1	77.1	77.1	24.3145	24.3084	24.3172	3	0	0	0	0	0	0	0	0	0	0	0	0	0	0	0	0	0	3	0		0.000146066	9.01364e-06	6435.45	10852.7	7945.71	8232.48	6891.16	7841.99	6827.35	9561.47	9926.76	5746.2	10633.1	4702.04	5063.09	6904.95	9357.41	8160.4	9710.11	83796.7	4778.3
597	M66T15	66.1	66	66.1	14.9445	14.4246	15.5166	12	1	0	0	2	0	0	0	1	0	0	0	1	0	0	0	0	1	3	1		0.000146074	9.01391e-06	1182.3	244.915	239.821	20225.7	337.769	202.73	334.158	1433.8	762.236	358.8	772.212	691.606	218.616	167.025	467.517	668.636	1355.43	43733	21464.1
598	M108T20	108.1	108.1	108.1	19.7135	19.7027	19.9753	6	0	0	0	0	0	0	0	0	0	0	0	0	0	0	3	0	2	0	0		0.000146171	9.01734e-06	599.388	491.471	367.541	2004.43	754.766	256.886	565.481	491.617	683.422	397.341	2966.99	1839.28	364.763	309.777	11917.8	446.941	10224.9	3649.67	379.88
599	M114T7	114.1	114	114.1	7.20556	6.68282	7.57513	16	0	0	0	0	0	2	3	0	0	0	0	0	2	0	0	1	3	1	3		0.000146394	9.02522e-06	3444.84	471.47	597.114	553.993	556.706	10218.1	17692.8	992.736	459.111	1700.3	1567.83	634.489	5624.35	901.268	519.055	3794	18201.5	8323.68	27281.8
600	M120T19	120.1	120	120.1	18.6318	18.484	19.0695	16	0	0	0	2	0	0	1	0	0	0	1	0	0	0	3	1	0	3	0		0.000146698	9.03592e-06	1772.79	634.358	914.158	11613	2155.87	662.465	1843.87	1199.97	1036.77	781.141	2896.87	1304.17	518.168	720.132	22104.9	2361.63	2278.42	6865.92	925.405
601	M92T13	92.1	92.1	92.1	13.0937	12.801	13.2961	24	0	0	1	4	2	0	0	3	1	0	1	2	0	0	0	0	4	3	1		0.000146968	9.04542e-06	1864.64	76.7917	11243.7	1.25134e+06	41167.8	475.38	541.044	23608	16209	168.444	12819.6	19579.3	3801.32	94.7048	7946.48	2778.5	55812.7	142404	3174.47
602	M159T19	159.1	159.1	159.1	18.9233	18.6984	19.3703	13	1	0	0	2	0	0	0	0	1	0	0	0	0	0	3	0	1	0	0		0.000147092	9.0498e-06	2360.31	834.828	607.154	30374.1	1095.02	713.141	760.042	817.106	3329.21	595.712	1324.52	866.401	538.033	633.95	139592	1015.71	4903.94	683.187	684.431
603	M57T10	57.1	57	57.1	10.4626	9.98317	10.8174	111	3	2	4	4	3	4	4	2	3	3	5	4	3	4	3	3	5	4	5		0.000147432	9.06172e-06	102850	57493.2	48642.8	82066.3	96471	104534	98092.6	122012	31494.8	89600.4	190460	49836.5	54561.2	46517.1	160793	124312	87554.1	43515.1	235256
604	M149T13_1	149	149	149	12.7698	12.7651	12.7761	72	4	3	4	4	3	4	4	3	4	3	5	4	3	4	3	3	5	4	5		0.000147944	9.07965e-06	63800.4	74791.9	76835.6	79990.5	74392.3	72343	68328.4	67501.5	63291.3	64844.8	81195.8	61979.8	55905.7	62310.1	99734.3	81190	60096.4	61878.5	103588
605	M57T8_1	57.1	57	57.1	7.61889	7.40317	7.93575	36	4	0	1	2	0	1	1	0	1	0	5	3	3	0	1	3	3	1	5		0.000147984	9.08107e-06	36666.4	9942.58	9803.44	18790.6	19583.1	24657.1	68422.9	13434.7	12164.8	14385.4	49866.3	17452.5	147349	10801	79594.2	52627.8	146110	25501.6	736340
606	M96T17_2	96.1	96.1	96.1	16.9009	16.7503	16.9057	5	0	0	0	2	1	0	0	0	0	0	2	0	0	0	0	0	0	0	0		0.000148461	9.09772e-06	1826.46	922.372	944.622	16950.3	6906.21	723.464	1888.11	1639.54	2034.97	1211.31	7047.2	1263.81	724.003	1022.03	1626.76	2034.12	2341.18	2693.77	2718.1
607	M106T12	106.1	106	106.1	12.0372	11.4459	12.3604	26	0	0	1	3	0	0	0	0	1	0	4	1	1	0	2	0	3	1	4		0.000149521	9.13455e-06	14439.7	4445.63	8542.95	24500.1	3926.4	6537.55	9781.89	42023.5	6358.23	18513.5	1.32785e+06	6072.66	5398.64	6214.78	892438	11440.6	15196.4	417356	134961
608	M132T11	132.1	132.1	132.1	11.0959	10.3789	11.4393	78	2	2	2	4	3	3	3	2	4	0	3	4	1	1	2	3	5	2	4		0.000149531	9.13489e-06	5992.95	16363.8	6039.56	13129.3	11969.5	12762.5	15982.8	13439.1	14357.6	750.33	16248.2	6482.89	5407.67	5474.87	14957.1	12452.5	12843.5	7603.68	74328.6
609	M108T19	108.1	108.1	108.1	18.9342	18.7139	19.2283	7	0	0	0	2	0	0	0	0	0	0	0	0	0	0	1	0	2	1	1		0.000149944	9.1492e-06	379.415	361.343	253.496	7427.82	483.066	225.84	538.014	500.268	442.882	303.134	856.234	390.451	268.133	329.999	9221.4	722.708	7252.25	13158.7	5600.6
610	M50T7	50	50	50	7.03853	6.9241	7.59142	16	0	0	0	0	0	1	2	0	0	0	0	0	1	0	0	0	5	3	2		0.000150812	9.17911e-06	5555.67	5848.31	6607.49	7644.3	6423.81	6654.97	11732.3	5814.55	6352.06	5294.86	6628.69	4555.22	9894.33	5102.97	9119.35	6136.21	43188.4	22010.6	11709.2
611	M45T29	45	45	45	28.7182	28.352	29.1527	39	2	0	2	0	0	0	0	0	0	1	0	3	0	0	0	0	4	2	3		0.000151404	9.19945e-06	4.10672e+06	4.98585e+06	3.37611e+06	4.21265e+06	4.12055e+06	4.35728e+06	4.24859e+06	4.29244e+06	4.70942e+06	4.36038e+06	4.44971e+06	3.30809e+06	3.62728e+06	4.18664e+06	4.23726e+06	4.25794e+06	3.26402e+06	3.33143e+06	3.21163e+06
612	M139T16	139.1	139.1	139.1	16.2136	16.0108	16.2717	6	0	0	0	0	0	0	0	0	0	0	1	0	0	0	0	0	0	4	0		0.000152175	9.22581e-06	261.733	125.965	204.173	279.141	389.16	126.702	256.046	196.844	191.463	233.914	3501.91	261.881	93.1007	57.0705	256.37	363.068	403.251	168750	370.658
613	M137T13_1	137	137	137	12.7698	12.7651	12.7761	72	4	3	4	4	3	4	4	3	4	3	5	4	3	4	3	3	5	4	5		0.000152262	9.22879e-06	421410	495900	512744	526551	495381	480743	452987	451577	417868	425947	536310	410881	367554	417059	655861	537693	418462	409415	693320
614	M78T14	78.1	78	78.1	13.8267	13.6186	13.9812	14	1	0	0	4	1	0	0	0	0	0	2	1	0	0	3	0	0	0	1		0.000152693	9.24346e-06	589.279	175.091	150.536	136435	2365.49	173.598	308.388	239.293	153.289	113.182	26532.9	1444.78	169.579	125.669	110437	366.233	861.831	873.76	33066.6
615	M113T12	113.1	113.1	113.1	11.893	11.5858	12.0191	19	1	0	0	2	1	0	0	0	0	1	2	1	0	0	0	0	3	1	5		0.000153662	9.27634e-06	10409.9	2915.72	2419.09	8617.6	9689.84	2075.99	6940.17	6290.35	3687.68	4120.94	11807.7	5061.21	2131.55	3548.52	8745.75	11018.8	7170.33	4622.87	482747
616	M98T11	98.1	98.1	98.1	11.1411	11.0665	11.1516	10	1	0	0	1	0	0	2	0	0	0	2	0	0	0	0	1	0	0	3		0.000155444	9.33633e-06	3560.35	1052.71	879.418	2550.31	1470.29	1219.19	3024.67	2335.31	1198.17	1175.48	5578.05	1013.92	2544.1	919.704	2477.69	2280.36	2850.45	1262.39	366738
617	M95T9	95.1	95	95.1	9.15667	8.74338	9.28463	19	0	0	0	1	1	0	0	0	1	1	3	1	0	0	0	2	2	0	3		0.000156981	9.38757e-06	485.761	524.411	495.168	9583.72	4487.31	1057.75	2284.45	1229.63	7921.14	2385.56	9926.63	4524.3	6217.75	362.293	4415.37	20139.2	16820.3	719.774	170818
618	M141T19	141.1	141.1	141.1	19.0714	18.9195	19.2598	9	0	0	0	0	0	0	0	0	0	0	0	0	0	0	2	0	3	1	1		0.000157484	9.40425e-06	957.002	653.343	2743.56	726.337	1119.6	577.053	679.694	792.054	614.721	934.499	930.342	5169.75	843.486	1916.03	26910.8	1026.33	11806.4	4153.78	2605.97
619	M108T21	108.1	108.1	108.1	20.7928	20.2808	21.0088	14	0	0	0	4	0	0	0	0	0	0	0	0	0	0	0	0	1	4	0		0.000157525	9.40561e-06	665.738	536.506	518.344	9911.71	537.819	384.923	448.681	642.819	545.087	451.844	697.326	586.794	459.218	358.286	2195.95	535.261	8381.55	61563.3	463.09
620	M80T14	80.1	80	80.1	13.9646	13.5864	14.1983	17	1	0	0	4	0	0	0	1	1	0	1	0	0	0	1	0	4	2	1		0.000157728	9.41232e-06	1313.25	196.508	3278.34	620263	4772.01	347.79	1215.71	12660.9	8879.38	1372.13	16642.9	4543.34	4978.64	154.472	13399.1	1105.16	30325.7	11065.6	13337.6
621	M114T13	114.1	114.1	114.1	13.0695	12.6791	13.4205	6	0	0	0	0	0	0	0	0	0	0	0	0	0	0	0	0	0	0	4		0.000158968	9.45317e-06	639.789	231.057	223.381	966.739	394.531	239.861	489.48	329.431	316.953	301.522	819.837	298.126	220.341	236.78	393.913	459.568	384.331	271.16	66534.8
622	M161T20	161.1	161.1	161.1	19.7345	19.7087	19.9753	6	1	0	0	0	0	0	0	0	0	0	0	0	0	0	3	0	2	0	0		0.000159461	9.46932e-06	3721.07	1822.24	1577.58	4655.48	2514.42	1764.14	2671.95	1804.61	2655.25	2802.59	4085.34	2745.62	2659.8	1755.84	11826.7	2258.87	10627.7	2097.14	2059.93
623	M133T16_1	133.1	133.1	133.1	16.113	16.1036	16.5824	77	4	3	4	4	3	4	4	3	4	3	5	4	3	4	3	3	5	4	5		0.000159818	9.481e-06	268340	413836	161024	403356	426657	373303	475794	413822	333340	61796.6	483121	218426	142227	246829	498665	480313	306784	191602	486582
624	M42T8	42.1	42	42.1	8.305	7.84697	8.63038	17	1	1	0	4	0	0	0	0	2	0	2	0	0	1	0	0	0	4	1		0.000160086	9.48976e-06	8794.12	9001.57	577.66	70832.2	1258.4	712.877	1843.13	9200.34	11617.5	970.687	77642.1	2566.97	1215.69	4399.92	1478.47	2951.92	9951.44	246506	10545.5
625	M121T10	121.1	121	121.1	10.0956	10.0585	10.6121	32	1	0	1	4	0	0	0	0	1	0	4	0	1	0	0	1	5	4	0		0.000160096	9.4901e-06	2137.09	454.734	1661.29	40546.2	909.003	514.191	893.774	1751.12	1870.58	494.82	6724.94	864.825	2816.39	712.363	721.678	2082.07	30985.4	152964	2006.74
626	M208T21	208.1	208.1	208.1	21.2122	20.8986	21.232	13	0	0	1	2	0	1	2	1	0	0	1	1	0	0	1	0	1	0	0		0.000160096	9.4901e-06	1062.52	3053.87	1579.88	2500.97	2154.23	1833.1	2137.54	2105.17	1836.42	1181.69	2811.73	1361.51	1112.66	1464.48	2725.56	2041.99	1826.94	1744.84	4396.71
627	M124T26	124.1	124.1	124.1	26.3847	26.3847	26.3847	2	2	0	0	0	0	0	0	0	0	0	0	0	0	0	0	0	0	0	0		0.00016034	9.49805e-06	18512.6	7951.64	5389.75	7842.68	5613.97	6233.26	5428.45	5821.89	6856.43	4987.73	7765.6	3975.86	4472.54	6212.6	7239.83	6222.12	5599.34	4501	4636.36
628	M147T14	147.1	147.1	147.1	13.9646	13.5169	14.0049	35	0	0	1	3	3	1	0	3	3	0	1	3	1	0	3	2	4	2	1		0.00016035	9.49838e-06	4355.15	2239.28	6652.52	540760	13680.4	4211.54	4388.58	12174.1	11024.1	2528.5	2735.49	9272.84	7683.9	3470.18	102409	6144.43	28140.6	10472.2	3268.3
629	M44T6	44	44	44	5.54822	5.12007	5.61808	23	3	2	2	1	0	1	2	2	0	1	2	1	0	1	2	0	1	1	0		0.000160409	9.50029e-06	56216.5	81320.2	63871.5	62680.4	53556.2	64827.2	68554.7	82978.5	58881.7	56888.9	65828.4	47461.3	52332.2	61192.3	72086.8	50970	51232.8	45216	45142.7
630	M54T12	54.1	54	54.1	11.7091	11.5858	11.824	6	0	0	0	0	0	0	0	0	0	0	0	0	0	0	0	1	0	1	4		0.000162153	9.56014e-06	888.846	504.228	653.732	4506.62	700.708	388.785	795.543	913.874	1217.44	598.924	1330.13	488.793	759.602	559.629	871.946	5210.85	1856.41	2879.25	257712
631	M87T33	87.1	87.1	87.1	33.279	32.7744	33.8801	25	0	0	0	0	0	0	0	0	0	0	0	0	0	0	0	0	0	0	5		0.000162465	9.5708e-06	374907	536712	427988	462959	413866	449667	429164	420413	484616	386366	502635	336456	335012	349918	516939	428769	299259	355933	543475
632	M99T11_2	99.1	99.1	99.1	11.0902	11.0806	11.2089	10	0	0	0	2	0	0	0	1	0	1	2	0	0	0	0	0	0	1	3		0.000165534	9.67462e-06	5742.74	2972.86	3048.41	14614.8	5171.76	2381.39	7089.68	8854.7	4346.71	8889.25	13821.3	2458.65	7403.06	2171.65	7241.5	6597.53	5810.68	3264.54	68453
633	M145T30	145.1	145.1	145.1	30.1612	28.6532	30.8647	62	0	0	1	2	2	1	1	2	2	0	2	0	0	0	1	1	2	0	2		0.000166217	9.69751e-06	23368.9	29843.7	24230.3	37788.5	25633.3	24806	32922.7	45455.4	26807.6	21882.1	31581	20454.4	19009	22825.9	25551.6	27409.1	19340.4	20141.6	38622.5
634	M94T12_2	94.1	94.1	94.1	12.3571	12.2604	12.6702	18	2	0	0	0	0	0	0	2	0	1	5	0	0	0	0	1	1	4	2		0.000167289	9.73327e-06	15638.5	260.285	1269.57	3897.13	383.262	2592.31	389.131	6826.39	1882.64	4461.99	70009.4	1310.79	467.536	403.824	1625.03	9268.78	6915.62	60372.7	18280.2
635	M77T7_1	77	77	77.1	7.4585	7.43487	7.83755	21	2	0	0	0	1	1	0	0	2	0	2	3	0	1	1	0	4	0	1		0.000168178	9.76277e-06	5986.51	5002.35	8945.61	7321.76	5490.05	5591.26	27748.4	4905.44	4821.64	6027.79	11909	7636.53	11268.7	7016.28	8303.42	9053.49	1.5872e+06	19839.2	61077.1
636	M139T17_2	139.1	139.1	139.1	17.4058	17.3886	17.4062	3	0	0	0	2	0	0	0	0	0	0	0	0	0	0	0	0	1	0	0		0.000168504	9.77354e-06	319.723	209.839	243.316	8554.89	394.262	88.0377	347.601	332.33	215.296	176.319	445.959	314.855	194.479	179.741	275.005	467.266	1556.3	1405.75	351.2
637	M155T15	155.1	155.1	155.1	14.6994	14.6989	14.7065	3	0	0	0	0	0	0	0	0	0	3	0	0	0	0	0	0	0	0	0		0.000168679	9.77933e-06	432.785	374.022	234.778	1159.27	470.124	351.5	398.37	995.235	379.059	17110.9	958.047	289.327	156.059	172.814	494.561	505.285	296.36	268.335	587.936
638	M107T21	107.1	107	107.1	20.6124	19.7079	21.5541	26	0	0	0	4	0	0	1	0	0	0	0	0	0	0	2	0	4	4	0		0.000168806	9.78353e-06	999.897	808.599	708.316	22792	805.76	597.984	1481.83	1233.99	953.046	779.48	1781.8	1704.92	666.819	746.144	11816.9	909.281	54642.5	256220	746.223
639	M85T15	85.1	85.1	85.1	15.4945	15.0242	15.8299	13	0	0	0	3	0	0	1	0	0	0	2	1	0	0	0	0	0	4	1		0.000169445	9.80458e-06	8339.63	4594.32	4202.27	13574.3	11004.9	4118.07	10378.8	8309.01	6492.24	2538.09	81680.1	5775.92	2340.06	5832.1	10120.9	11862.5	8168.7	189354	5009.14
640	M43T26	43	43	43	26.419	25.3019	26.9185	40	1	0	0	0	0	1	0	0	0	0	0	1	2	2	0	0	5	0	0		0.000169559	9.80835e-06	314391	504629	420696	475734	416209	437290	443397	444646	488339	392404	473736	394419	366438	527303	441283	422111	365151	358797	292226
641	M125T17	125.1	125.1	125.1	17.4058	17.4024	17.4135	5	0	0	0	4	0	0	0	0	0	0	0	0	0	0	0	0	1	0	0		0.000171632	9.87614e-06	1064.83	533.022	541.246	13740.7	1471.34	427.389	1133.4	955.9	588.527	601.875	1185.29	778.868	473.007	539.714	889.32	1200.6	2171.47	1697.36	3179.88
642	M42T13	42.1	42	42.1	12.7698	12.3433	13.1966	32	1	1	1	4	2	3	2	0	0	0	3	1	1	0	2	1	2	2	1		0.000172219	9.89521e-06	31206.7	46935.5	44976.2	102857	50287.4	47361.5	38437.7	44412.6	38494.6	29945.5	55646.4	28328.7	30990.9	33013	64141.5	52156.2	42448.4	38875.2	78910.8
643	M82T8	82.1	82	82.1	8.29187	7.96927	8.34648	23	2	0	0	4	0	0	0	1	0	1	3	1	0	0	0	0	1	4	4		0.000173021	9.92117e-06	5830.48	1092.88	629.981	57792.2	1001.07	1251.42	2038.94	7022.54	2952.68	2554.68	43601.5	2812.03	4620.74	2959.62	2279.45	3080.67	14345.4	190008	820670
644	M51T8_2	51	51	51	7.58489	7.2839	7.88848	44	0	1	0	1	1	1	3	2	2	0	2	0	1	0	1	0	4	0	3		0.000173511	9.93699e-06	35498.5	61240.8	37104.1	36446.4	49182.7	48115	49285.3	41299.1	35649.1	33493.3	46323.3	31683	40858	36501.7	45234.9	39888.4	201228	40270.1	69311.7
645	M96T16_2	96.1	96.1	96.1	16.0065	15.9512	16.3908	5	0	0	0	0	0	0	0	0	0	0	0	0	0	0	0	0	0	3	1		0.000173957	9.95136e-06	2566.03	527.377	732.715	1266.06	1699.89	623.64	1696.67	758.983	795.125	933.269	3318.14	825.853	683.319	585.844	1327.99	1960.56	1886.91	1.13431e+06	7126.79
646	M65T7	65.1	65	65.1	7.47469	7.15137	7.83618	16	0	0	2	0	0	1	1	0	0	0	0	1	0	1	0	0	5	0	1		0.000176171	1.00222e-05	1706.22	1778.83	3358.33	2797.52	2062.75	3548.99	16629	1537.04	1921.76	2155.45	3720.95	2926.72	4730.45	2546.31	4195.88	2692.22	374759	8562.66	56351.2
647	M69T25	69.1	69.1	69.1	24.7796	24.7177	25.26	13	0	1	0	2	0	0	0	1	1	0	5	0	0	0	2	0	0	0	1		0.000179027	1.01123e-05	19930.8	39724.1	18319.9	54497.3	18933.4	17477.5	16584.1	37051.9	45178.8	15915.6	67957	16619.5	13143.6	17997.2	65281.1	24584.3	25893.3	20067.7	23128.4
648	M190T15	190.2	190.2	190.2	14.7096	14.5425	14.9628	7	0	0	0	3	0	0	0	0	0	0	0	0	0	0	0	0	1	3	0		0.000179719	1.0134e-05	319.775	4.45653	6.44279	27528.9	12.9175	0	18.2934	17.719	16.3777	5.24743	12.35	23.6069	0	0	2841.91	13.3247	4156.16	13934.9	26.9292
649	M105T10	105.1	105	105.1	10.0901	9.79297	10.4066	14	0	0	0	4	0	0	0	0	0	0	1	0	0	0	0	0	2	3	0		0.000179993	1.01425e-05	891.776	517.424	859.56	19960	642.858	513.685	743.192	841.949	1034.63	492.361	2586.28	429.024	968.267	630.29	853.24	965.019	19536.3	67254.8	1058.7
650	M91T19	91.1	91.1	91.1	18.7168	18.5536	18.9381	12	0	0	0	3	0	0	0	0	0	0	0	0	0	0	2	0	0	3	2		0.000182135	1.0209e-05	1832.05	1164.49	1020.2	45452.4	1353.93	958.792	1440.9	2554.72	1246.08	700.268	2842.03	754.627	656.234	1014.36	94579.4	1535.76	2940.76	73583.3	8237.67
651	M40T6	40.1	40	40.1	5.96393	5.92967	6.24268	15	1	0	1	0	1	0	0	0	0	0	0	1	1	0	0	0	5	0	1		0.000182174	1.02102e-05	7714.43	0	14395.4	0	10892.3	87.1459	0	0	0	0	376.674	7128.34	10370.2	0	0	1840.64	246062	0	65878.3
652	M78T15	78.1	78	78.1	14.7043	14.3253	15.5166	18	0	0	1	2	0	0	1	0	1	0	0	0	0	0	0	0	4	4	1		0.000183245	1.02432e-05	404.868	220.671	1767.6	34637.9	415.126	140.418	2492.96	592.309	5734.69	160.667	486.979	551.182	147.516	179.479	10275	491.364	76358.3	93203.6	7867.89
653	M109T21	109.1	109.1	109.1	20.7776	20.2005	21.0869	27	0	0	1	4	0	0	0	0	0	1	0	1	1	0	0	0	4	4	0		0.000183675	1.02564e-05	2985.09	1197.65	2243.23	21249.8	1296.83	1037.45	1618.67	2659.9	1665.78	6628	3773.26	3709.03	4777.04	1236.37	3228.67	1349.87	50435.7	244381	2117.84
654	M195T23	195.1	195.1	195.1	23.0894	23.0786	23.0969	3	0	0	0	0	0	0	0	0	0	0	0	0	0	0	0	0	0	3	0		0.00018435	1.0277e-05	1672.08	1649.59	1523.58	2053.86	1724.68	1738.35	1718.57	1987.21	1793.39	1273.45	2057.86	1526.38	1162.83	1531.75	2212.46	2056.9	1925.56	63772.5	1052.69
655	M97T7	97.1	97.1	97.1	7.41178	7.06212	7.62263	13	0	0	0	0	0	0	0	0	0	0	0	0	0	0	0	0	2	4	4		0.000184524	1.02824e-05	590.589	542.799	474.985	700.98	576.653	1303.6	1891.58	677.255	456.43	451.933	854.812	452.679	6379.12	390.763	2708.87	1743.9	17429	33386.1	23947.9
656	M161T36	161.1	161.1	161.1	35.661	35.0205	36.3015	73	1	0	2	0	0	0	2	1	0	0	0	4	0	3	0	2	5	0	0		0.000185312	1.03064e-05	53950.4	82600.2	78058	79664.7	69761.2	72576.4	138773	73008.3	78976.2	66566.9	76822.9	112274	60872.4	70131.7	77354.8	61390.2	90750.1	58626.9	62163
657	M40T8	40	40	40.1	8.31248	8.03643	8.74722	29	2	0	0	4	0	0	0	3	1	0	3	0	0	2	0	2	3	4	1		0.000186775	1.03507e-05	17964.5	7829.94	5971.71	95758.7	5651.92	7818.47	8040.8	25832.5	15228.7	6242.58	35180.3	11450.7	5614.28	16213	8510.39	13381.5	26544.9	449179	14403.4
658	M93T12_1	93.1	93.1	93.1	12.3589	12.0158	12.6642	37	3	0	1	3	0	2	0	3	2	1	5	1	0	0	1	2	4	4	3		0.000187781	1.0381e-05	116711	289.539	11103.1	34786.8	2457.28	24225.9	2920.67	43437.2	14987.6	30720.3	492883	13617.1	1415.69	2735.18	12416.2	67863.2	44241.2	427796	33434.7
659	M67T16_1	67.1	67	67.1	16.0064	15.8299	16.5785	14	0	0	0	0	0	0	0	1	0	0	2	0	0	0	0	0	1	4	2		0.000188261	1.03953e-05	15377.5	1489.28	2043.22	3848.93	6426.79	1618.81	9783.36	7405.29	1757.72	3855.79	17048.4	4508.87	2014.82	1365.12	2815.24	7648.7	13952.4	3.95681e+06	34909.9
660	M104T7_1	104.1	104.1	104.1	7.44705	7.43498	7.60702	11	0	0	0	0	0	0	0	0	0	0	0	0	0	0	0	0	5	0	5		0.000188434	1.04005e-05	506.734	594.918	765.485	894.67	614.939	574.085	2301.17	574.77	710.176	436.148	778.064	568.202	559.285	640.787	969.847	784.866	40902.1	851.041	24378.8
661	M71T13	71.1	71.1	71.1	12.7698	12.3433	13.3474	125	4	3	4	4	3	4	4	3	4	3	5	4	3	4	3	3	5	4	5		0.000188549	1.0404e-05	152886	165788	177411	187121	179887	170111	166132	164604	145774	149304	207121	144886	136035	144635	225636	194107	161210	143735	230981
662	M41T15_1	41	41	41.1	14.6695	14.3986	14.9628	12	0	0	0	1	1	0	1	0	0	1	1	2	0	0	1	0	1	2	0		0.000188661	1.04073e-05	20221.7	10185.1	11775	190134	19854.2	10641.6	15924.2	16023.2	11939.2	20574.9	31659.7	25198.1	9515.37	9166.78	96608.9	13153.1	29282.3	922214	14387.5
663	M133T12_2	133.1	133.1	133.1	12.2398	12.1067	12.358	11	0	0	0	3	0	0	0	0	1	0	0	1	0	0	0	0	3	1	0		0.000188746	1.04099e-05	8867.42	8726.82	6788.47	31090.4	10812.6	8998.02	9296.72	9336.96	11154.1	7755.79	10530.6	12332.7	7924.72	8533.62	11058.2	7686.25	26110.7	9813.13	22638.9
664	M132T17	132.1	132	132.1	17.402	17.2955	17.6005	6	0	0	0	3	0	1	0	1	0	0	0	0	0	0	0	0	0	1	0		0.000189395	1.04292e-05	2428.58	4528.76	1419.73	16033.1	4263.35	2836.16	4798.24	3863.36	3186.8	800.592	6071.71	2239.64	1276.4	2385.7	5291.18	4648.02	4364.79	2845.53	3434.67
665	M123T21	123.1	123.1	123.1	21.0164	20.6118	21.5965	17	0	0	0	3	0	0	1	0	0	0	0	0	0	0	0	0	3	4	0		0.00019025	1.04547e-05	1119.78	1161.86	795.175	9813.14	1540.34	754.308	1601.57	1156.97	937.826	777.012	1914.87	946.147	507.219	1025.06	1722.32	1178.52	28865.1	215394	1176.1
666	M96T7_1	96.1	96.1	96.1	7.4585	7.24922	7.79503	19	0	0	0	0	0	0	2	0	0	0	1	0	1	0	1	0	5	4	3		0.000190282	1.04556e-05	406.894	465.897	460.385	651.49	518.183	839.457	4179.44	409.399	475.506	391.596	1258.56	364.014	6619.72	360.935	2529.02	1280.9	62681.4	114754	12532.7
667	M67T9	67.1	67.1	67.1	9.27332	8.74003	9.72655	65	3	0	3	4	3	3	2	3	4	1	5	3	0	0	1	2	5	3	5		0.000190459	1.04609e-05	342812	676.133	123070	285339	212161	193844	20990.8	1.04498e+06	798594	17329.1	602598	814371	9183.2	589.138	27856.5	194367	971114	198748	80286.4
668	M83T10	83.1	83.1	83.1	10.3444	10.0969	10.4423	21	0	1	0	1	1	0	1	0	0	0	5	0	0	0	0	1	3	3	3		0.000190627	1.04658e-05	10226.9	4294.13	4284.32	17712.1	8728.59	4602.64	12443.3	11115.5	2525.4	8678.17	58268.2	3916	12710.6	13685.4	10796	12964.4	173522	26011	352484
669	M148T16_1	148.1	148.1	148.1	16.1106	16.1036	16.1907	70	4	3	4	4	3	4	4	3	4	2	5	4	2	4	3	3	5	4	5		0.00019185	1.05019e-05	69891.8	108490	39940.7	105714	112188	96752.1	125608	108394	87643	13581	126772	55935.3	35054.6	64491.6	130598	125291	79706.1	49237.1	133474
670	M120T20_2	120	120	120.1	19.5484	19.2218	19.5725	13	0	0	0	1	0	0	1	0	0	0	1	1	0	1	1	1	3	3	0		0.000192287	1.05148e-05	3383.07	983.161	1284.88	6574.53	3622.97	1160.31	2549.98	2088.59	1002.51	915.595	3224.55	1963.62	769.185	2886.44	6014.58	3763.22	7273.39	8154.74	1846.57
671	M176T15	176.2	176.2	176.2	14.8076	14.7065	14.9628	4	0	0	0	2	0	0	0	0	0	0	0	0	0	0	0	0	0	2	0		0.000192614	1.05244e-05	53.3765	5.46995	3.11887	15950.1	27.2884	7.2782	40.2052	13.9401	112.887	0	285.84	49.7837	22.8392	9.3662	57.4633	92.9199	61.8758	5992.98	37.3272
672	M93T14	93.1	93.1	93.1	13.9537	13.4998	14.2334	56	0	0	1	4	2	0	0	3	3	0	2	3	2	3	3	1	4	4	4		0.000192785	1.05294e-05	3573.69	284.19	10098.2	4.57272e+06	23037.3	1811.08	5968.76	48032.7	33399.6	2594.29	58991.6	32122.6	21878.8	21286.6	255864	6946.83	85639.2	67203.4	26870.9
673	M53T7	53	53	53.1	7.45513	6.90217	7.79883	25	1	1	2	2	1	2	1	1	0	0	2	2	3	1	0	2	3	1	0		0.00019301	1.0536e-05	5289.37	6000.91	9489.88	9754.4	6676.25	7477.86	46125.7	4910.73	6186.52	6511.44	11294.2	7256.03	10256.2	8522.44	9573.17	7009.29	783802	29271.7	78486.1
674	M136T9_1	136.1	136.1	136.1	9.16264	9.15888	9.35227	14	0	0	0	2	2	0	0	0	1	0	3	1	0	0	1	1	1	2	0		0.000193042	1.0537e-05	112.405	301.997	453.227	12629.8	5825.66	353.735	708.768	1161.46	10407.5	2617.31	11780.4	5508.41	641.514	85.8602	3382.23	25883.7	3990.42	4243.85	1748.49
675	M137T17	137.1	137.1	137.1	17.4041	17.2999	17.6844	6	0	0	0	3	0	0	1	0	0	0	1	0	0	0	0	0	0	0	1		0.000193082	1.05381e-05	1309.16	1220.95	700.198	31110.5	2502.6	921.778	2227.47	1401.82	1344.33	505.377	3272.17	1141.55	764.838	851.908	1924.82	2067.91	5773.02	2224.41	2497.25
676	M42T7	42.1	42	42.1	7.4585	7.26998	7.61657	7	0	0	0	0	0	0	0	0	0	0	1	0	0	0	0	0	3	2	1		0.00019419	1.05705e-05	721.624	1406.21	1991.09	1605.21	1059.36	1719.58	6694.04	1531.78	2589.44	788.801	6181.29	663.306	2885.42	3042.48	1915.91	1417.43	126141	15638.8	62576.8
677	M151T14	151.1	151	151.1	14.3595	14.1771	14.9096	6	0	0	0	0	0	0	0	0	0	0	0	0	0	0	0	0	2	3	1		0.00019423	1.05716e-05	342.542	143.982	236.649	342.201	445.799	121.629	401.906	148.793	268.258	222.203	510.909	182.267	136.599	128.227	421.344	502.073	6928.12	7379.08	2085.04
678	M97T17	97.1	97.1	97.1	17.4022	17.1161	17.4134	6	0	0	0	4	0	0	1	0	0	0	0	0	0	0	0	0	1	0	0		0.000194665	1.05843e-05	3031.2	1858.68	2360.75	34211.2	4771.94	1587.45	6419.35	2414.01	2009.12	2254.58	6277.28	2049.03	1422.02	1552.71	2869.34	4422.43	6033.37	6456.02	6405.71
679	M43T15	43.05	43	43.1	14.8569	14.6957	15.0242	14	0	0	0	3	0	0	0	1	0	2	1	0	0	0	0	0	0	4	0		0.000194807	1.05884e-05	5699.42	2403.97	3568.57	161713	3829.54	4078.85	5600.04	19377.8	7020.66	46785.2	38188.4	4797.89	1188.57	2327.96	3388.63	12607.2	2502.67	262122	2305.19
680	M84T12_1	84.1	84	84.1	11.7249	11.5858	12.003	7	0	0	0	0	0	0	0	0	0	0	0	0	0	0	0	0	0	0	5		0.000195135	1.05979e-05	0	0	0	0	0	0	0	0	3332.1	0	584.912	0	0	0	0	20237.3	1426.24	731.942	1.47246e+06
681	M119T13	119.1	119	119.1	13.0872	12.727	13.1968	41	0	0	1	4	2	0	0	3	2	0	1	3	2	0	2	2	5	3	2		0.000195495	1.06083e-05	3502.21	471.751	19018.8	2.34725e+06	72102.6	1597.9	1611.67	42397.4	35873.7	608.68	22206.8	34743.6	9239.56	541.14	22960.4	9220.07	125986	21258.5	7752.12
682	M63T9	63	63	63	9.16292	9.07308	9.57652	13	0	0	0	2	2	0	1	0	1	0	1	1	1	0	0	0	1	0	1		0.000195538	1.06096e-05	1053.55	3042.64	1201.87	9482.17	6372.04	2691.35	2599.81	2251.33	6808.55	1715.33	8249.76	3718.06	1195.41	1024.84	4854.68	12427.3	2616.72	1624.63	2577.67
683	M162T21	162.1	162	162.1	20.6092	20.5766	20.9338	13	0	2	0	1	1	0	0	0	0	0	1	0	0	1	2	1	1	0	2		0.000195553	1.061e-05	2666.55	3207.25	1417.42	6520.98	4912	2640.23	4478.15	3789.84	2451.57	721.377	5612.55	1934.23	1261.22	2527.46	10084.3	6472.03	4860.09	4091.82	6825.99
684	M159T20	159.1	159.1	159.1	20.2808	19.9791	20.3073	7	0	0	0	3	0	0	0	0	0	0	0	0	0	0	1	0	2	1	0		0.000195611	1.06117e-05	1324.7	1210.4	1335.08	14621.9	2072.12	1126.61	1391.6	1706.03	1577.35	949.183	1820.18	1403.33	1040.08	1049.93	3772.81	1715.58	8489.6	1766.65	1197
685	M49T5	49	49	49	5.12958	5.09327	5.4351	124	4	3	4	4	3	4	4	3	4	2	5	4	3	4	3	3	5	4	3		0.000195827	1.06179e-05	157546	259252	180837	248321	182662	174625	181153	202396	245824	106886	239651	197939	143413	155069	215874	181949	181906	149282	148646
686	M109T12_2	109.1	109.1	109.1	12.3597	12.2381	12.4402	20	3	0	0	1	0	0	0	0	0	1	5	0	0	0	1	1	0	4	4		0.000195923	1.06207e-05	12781	413.236	1637.83	8928.76	1395.26	2230.12	1240.29	5281.6	2265.78	3850.41	52840	1727.1	2225.26	615.808	5902.84	8228.95	9098.85	43647.6	24848.2
687	M134T9_2	134.1	134.1	134.1	8.55828	7.70132	8.57572	36	0	0	0	3	0	2	2	3	1	0	3	0	1	1	1	1	5	1	5		0.000197043	1.0653e-05	1610	1114.53	2311.65	7438.43	2612.14	4516.34	9890.6	15361.4	3407.55	1381.38	5642.81	1213.85	24308.3	1609.49	9316.79	2326.52	203488	10279	123529
688	M52T8	52.05	52	52.1	8.29745	7.84178	8.55503	18	0	0	1	2	0	1	1	0	1	0	2	0	1	0	0	0	1	4	2		0.000197094	1.06544e-05	8752.78	1307.67	1345.53	87097.4	1287.47	1873.67	2694.86	14034.6	5150.51	1864.68	161683	6107.96	3762.93	9312.84	3012.83	4729.74	15975.7	486785	35635.9
689	M128T16	128.1	128.1	128.1	16.1665	16.1276	16.1705	3	0	0	0	0	0	0	0	0	0	0	0	0	0	0	1	0	0	2	0		0.00019763	1.06698e-05	476.15	493.167	264.961	743.692	933.717	459.048	577.06	625.394	475.999	432.297	1020.89	388.32	302.838	340.91	3673.82	916.079	1562.16	8482.05	701.469
690	M53T15	53	53	53.1	15.0099	14.5582	15.2437	14	0	0	0	2	0	0	0	0	0	0	0	1	0	0	0	1	0	4	2		0.000197929	1.06784e-05	2315.41	1156.99	1568.44	103923	2934.83	1347.35	1547.79	4918.05	5826.55	2323.39	4731.77	3688.43	1312.66	1281.43	3339.59	5609.71	7694.43	199669	7488.76
691	M67T12	67.1	67	67.1	11.8271	11.5533	12.0337	17	1	0	0	2	0	0	1	1	0	1	1	0	0	0	0	0	1	0	5		0.000198234	1.06871e-05	20439.4	5176.19	3222.55	54458	15317.6	6766.07	16307.6	15651	3286.4	12286.1	21661.3	4914.39	3718.25	1531.63	6549.86	16694.1	45049.9	3828.93	3.00256e+07
692	M135T13_2	135.1	135.1	135.2	13.0937	12.2222	13.4216	33	0	0	1	4	1	0	0	2	2	0	1	2	1	0	1	1	5	3	0		0.00019984	1.07381e-05	1262.39	188.533	6529.27	542319	23825.8	547.302	527.925	14804.3	11145.8	131.802	8179.66	12097.4	4008.31	282.481	8767.05	3555.49	47051.9	164980	1476.24
693	M81T17_2	81.1	81.1	81.1	17.4076	17.402	17.4635	6	0	0	0	4	0	0	0	0	0	0	0	0	0	0	0	0	1	0	1		0.00019994	1.07413e-05	2974.91	1300.38	1745.89	133021	4765.27	1282.38	3588.09	2850.48	1746.49	1744.25	6252.14	2765.93	1078.55	3907.82	3755.16	3643.78	15624.7	5900.53	13264.4
694	M118T11	118.1	118	118.1	11.0997	10.9305	12.2436	13	0	1	0	1	0	0	1	0	0	0	2	0	0	0	0	0	2	1	4		0.000200647	1.07637e-05	979.304	3082.07	776.324	2040.52	1822.96	2180.99	3205.7	2232.22	2271.32	383.034	4441.13	1001.95	1070.01	1094.8	2363.39	2192.29	3547.92	3080.68	15557.5
695	M63T8_2	63	63	63	7.6014	7.43757	7.85658	14	0	0	0	0	0	1	3	0	0	0	0	0	2	0	1	0	3	1	2		0.000201044	1.07762e-05	192.009	239.16	293.164	293.062	140.061	1074.58	7368.08	313.723	301.286	82.7507	314.847	95.3431	6057.87	199.484	2662.51	431.575	83546.7	2771.3	14167
696	M56T8	56.1	56.1	56.1	8.29951	8.0469	8.6415	26	1	0	0	4	0	0	0	1	2	0	5	1	0	0	0	0	1	4	4		0.000202141	1.08121e-05	14727.1	5217.01	4024.81	50461	5258.7	6195.5	8116.86	11726.7	53260.5	3418.56	647007	12775.5	15627.2	4020.6	12585.4	8563.26	25283.5	135814	341183
697	M56T14	56.1	56.1	56.1	13.8097	13.7099	13.9032	10	1	0	0	4	0	0	1	2	0	0	1	0	0	0	0	0	0	1	0		0.000203711	1.08632e-05	8444.52	1385.67	1506.73	77128.8	2704.02	1950.75	15041.5	9346.67	2103	1993.77	16609.6	2162.22	1776.78	1199.24	5010.24	3027.65	2548.16	3746.35	13878.4
698	M55T14	55.1	55.1	55.1	13.8934	13.5816	14.1983	15	0	0	0	4	0	0	0	0	0	0	1	0	0	0	2	0	3	3	1		0.000206448	1.09515e-05	4908.5	2659.39	3498.48	901298	6013.41	2137.48	8596.02	14098.8	5895.17	4000.04	22124	6256.7	7100.56	1596.51	111980	7016.28	78151.1	32138.2	42119.6
699	M54T7	54.1	54	54.1	7.45578	7.43942	7.62998	6	0	0	0	0	0	0	0	0	0	0	0	0	0	0	0	0	3	1	2		0.000206808	1.0963e-05	443.13	862.809	716.248	606.629	368.468	866.476	4594.75	609.451	704.451	463.639	807.399	370.835	1305.19	865.357	975.371	666.178	74680.9	4159.5	16772.2
700	M107T19	107.1	107	107.1	18.8098	18.5047	19.2321	12	0	0	0	3	0	0	0	0	0	0	0	0	0	0	2	0	2	0	1		0.000208653	1.1022e-05	2889.29	1161.47	1301.67	35168.3	1699.97	876.228	1783.91	1585.5	1303.65	1251.93	2884.87	1074.91	599.85	3338.54	16557.5	2650.48	16595.9	11194.7	2005.94
701	M132T14	132.1	132.1	132.1	14.4242	13.8233	14.9312	12	0	0	0	2	0	0	0	0	0	0	1	1	0	0	0	0	5	0	1		0.000208987	1.10326e-05	303.563	248.033	176.583	8357.31	269.924	186.885	189.55	1496.12	1746.29	169.471	2358.85	1197.23	108.637	178.133	667.892	299.272	22043.1	441.463	9524.04
702	M149T17_2	149.1	149.1	149.1	17.3581	17.299	17.7452	12	0	0	0	4	1	1	0	1	0	0	0	0	1	0	0	1	1	1	0		0.000209652	1.10537e-05	4040.57	5313.14	2240.83	49674.2	6534.05	3935.91	4536.4	4748.68	4453.91	985.756	8996.24	3251.48	1996.78	2702.57	8339.59	6225.01	6828.65	4235.2	3397.64
703	M68T21	68.1	68.1	68.1	21.011	20.7641	21.5541	12	0	0	0	0	0	0	1	0	0	0	1	1	0	2	0	0	2	4	0		0.000209885	1.10611e-05	6111.23	7424.7	2638.97	7072.61	5395.95	3201.83	12384.8	11597	3063.73	2317.2	8526.4	6801.56	903.45	16608.8	3206.64	4449.94	27861.1	261373	1444.19
704	M78T9	78.1	78	78.1	9.16275	9.15068	9.58577	5	0	0	0	1	0	0	1	0	0	0	0	0	0	0	1	2	0	0	0		0.000209953	1.10633e-05	948.293	5332.73	1203.79	15060.4	8735.02	2863.97	3012.97	2469.28	9882.97	1812.49	11876.1	4486.69	924.553	719.728	5385.4	27342.2	3799.57	1348.16	875.609
705	M119T11	119.1	119.1	119.1	11.0897	10.5859	11.1002	15	0	0	0	3	0	0	1	0	0	0	0	0	1	1	0	0	2	4	0		0.00021021	1.10714e-05	1148.62	702.351	499.963	10774.2	521.17	1253.37	2956.07	2205.74	998.092	636.777	3591.2	626.587	7737.24	2897.08	1275.05	1569.27	13950.7	64661.1	2239.65
706	M81T9	81.1	81.1	81.1	9.16287	8.73958	9.5703	62	3	0	1	4	3	2	2	3	4	3	5	3	1	0	3	3	4	4	4		0.000210365	1.10763e-05	28218.2	838.868	11207	220282	113212	17021.7	11200.5	73586	235210	55751.1	221865	103265	17163.8	603.825	57662.2	395456	102850	17535.7	49652.4
707	M144T19	144.1	144.1	144.1	18.8992	18.8913	18.9381	5	0	0	0	0	0	0	0	0	0	0	0	0	0	0	2	0	0	3	0		0.000210683	1.10864e-05	196.801	246.778	103.304	975.486	174.343	174.987	146.51	179.876	283.616	226.445	268.11	122.41	67.1183	172.133	16914.4	185.088	306.972	11310.1	96.6535
708	M107T13	107.1	107	107.1	12.9858	12.6679	13.5043	62	1	1	3	4	2	0	1	3	3	0	4	2	2	0	3	1	5	1	3		0.000210724	1.10877e-05	7060.4	3807.47	25975.3	2.50386e+06	80315.4	1492.18	4597.23	46108.9	35617.3	473.979	30244.9	38608.4	11407.6	464.366	30200.4	10488.5	181175	6784.21	12333.3
709	M92T20	92.1	92.1	92.1	20.0409	20.0391	20.0426	2	0	0	0	0	0	0	0	0	0	0	0	0	0	0	0	0	0	2	0		0.000217258	1.13166e-05	224.37	294.505	142.995	343.726	211.828	165.399	204.686	217.13	155.437	175.624	1400.12	165.293	170.318	141.671	328.29	232.741	487.978	34856.2	1503.18
710	M103T7_2	103.1	103.1	103.1	6.916	6.61015	7.10407	12	0	0	0	0	0	0	1	0	0	0	0	0	1	0	0	0	4	0	5		0.000217637	1.13297e-05	12869.6	16457.8	12929.9	17258	14495.7	15883.7	22916	13465.8	15317.1	11903.8	16744.3	11778.4	30438.5	13444.8	24301.8	15194.7	45889.1	22218.9	365983
711	M161T18	161.1	161.1	161.1	17.7299	17.3886	17.8714	6	0	0	0	0	0	0	0	0	0	0	1	0	0	1	0	0	4	0	0		0.00021821	1.13496e-05	849.35	610.665	1019.3	1921.67	891.773	792.216	859.275	976.678	975.637	771.619	1702.22	989.757	785.253	2662.45	1508.76	1057.38	7955.55	818.473	1257.88
712	M176T14	176.2	176.2	176.2	13.8951	13.8934	13.9812	5	0	0	0	4	0	0	0	0	0	0	0	0	0	0	1	0	0	0	0		0.000220473	1.14276e-05	3.09957	26.3725	3.22859	33694.7	41.996	3.0043	45.488	53.0543	70.889	18.196	63.4006	76.3633	15.9794	7.58119	6672.19	22.4121	190.11	104.758	121.351
713	M78T13	78.1	78.1	78.1	13.1	12.6642	13.2997	8	0	0	0	4	0	0	0	0	0	0	1	0	0	0	0	0	0	2	1		0.000220634	1.14331e-05	513.563	141.815	2601.44	410100	9167.39	210.619	284.116	5517.78	4839.47	206.56	4200.22	4694.8	762.221	80.6983	2375.17	1186.52	4384.33	145979	2919.63
714	M164T17	164.1	164.1	164.1	16.919	16.9158	16.9227	6	1	0	0	0	0	0	0	0	0	0	0	1	0	0	0	0	3	1	0		0.000222771	1.15063e-05	8841.92	142.001	236.425	2381.22	798.84	343.08	433.945	6292.84	1680.85	149.324	871.378	8383.41	75.7773	85.595	1085.23	669.371	11312.7	1325.15	133.873
715	M207T36	207.1	207.1	207.1	35.596	35.0205	36.1414	17	0	0	0	0	0	0	0	0	0	0	0	0	0	0	0	0	0	0	3		0.000223539	1.15324e-05	7443.25	10670.2	8630.74	9685.72	8421.27	9237.38	8600.24	10079.5	10299.4	8381.94	9539.94	8205.52	7758.14	8231.78	9046.35	7351.91	8002.3	7520.23	24281
716	M212T23	212.1	212.1	212.1	23.0879	23.0791	23.1005	6	0	0	0	0	0	0	0	0	0	0	1	0	0	0	0	0	1	4	0		0.000224087	1.15511e-05	555.797	441.499	552.529	510.891	1220.54	363.238	461.708	512.387	258.785	330.262	2976.05	599.119	285.485	427.743	518.581	2913.58	2400.69	780203	424.849
717	M144T15	144.1	144.1	144.1	14.7026	14.4358	14.7096	3	0	0	0	2	0	0	0	0	0	0	0	0	0	0	0	0	1	0	0		0.000224456	1.15636e-05	137.09	55.1627	31.9978	3491.39	67.4054	61.3091	108.522	168.829	161.786	102.401	216.9	45.6961	33.7322	18.9313	651.73	65.6935	1616.5	197.391	158.357
718	M38T8	38	38	38.1	8.31238	8.29357	8.7325	11	0	0	0	2	0	0	0	2	1	0	1	0	1	1	0	0	1	2	0		0.000224518	1.15657e-05	2835.49	1185.72	925.427	23609.3	934.261	1028.66	1164.2	5311.28	2793.79	1097.25	23565.6	1877.99	1632.03	3081.55	1677.09	2124.72	4877.9	73389.9	586.628
719	M206T13	206.2	206.2	206.2	12.8192	12.8154	13.1123	5	0	0	0	2	0	0	0	0	0	0	0	0	0	0	0	0	3	0	0		0.000225074	1.15845e-05	0	0	0	3533.98	0	0	0	0	0	0	0	0	16.1935	2.9812	4.65746	5.03305	4841.96	0	3.72964
720	M149T16	149.1	149	149.2	16.1057	14.9676	16.5824	115	3	3	3	4	3	4	4	3	4	1	5	4	1	2	3	3	5	3	5		0.0002253	1.15922e-05	7822.28	11926.8	4630.04	12386.6	13777.9	10202	14453	12212.4	9892.69	1327.42	15805.9	6575.62	3870.23	6933.82	15100	14907.4	9490.21	6820.76	15180.9
721	M128T13	128.1	128	128.1	12.9549	12.8125	13.1158	8	0	0	0	4	0	0	0	0	0	0	0	1	0	0	0	0	3	0	0		0.000226152	1.1621e-05	227.705	462.889	253.316	61039.6	413.94	315.843	384.26	473.363	450.292	173.377	433.507	545.336	244.365	270.468	437.179	457.863	30419.5	309.533	1739.81
722	M82T9	82.1	82	82.1	9.27027	8.81988	9.57103	66	4	0	3	4	3	3	1	3	4	1	5	4	0	0	2	2	5	4	4		0.000226365	1.16282e-05	246035	321.057	86549.9	239207	162965	136501	4456.64	725375	557543	19230.7	419057	574528	12712.8	410.729	29326.2	211512	689051	148797	68157.2
723	M70T11	70.1	70.1	70.1	11.1451	10.8664	11.1832	23	3	0	0	2	0	0	0	0	0	2	5	0	1	0	0	1	0	1	4		0.000227183	1.16557e-05	29836.5	8355.11	9061.73	16739.4	13809.3	8250.32	18474.5	18689	7873.21	16178.7	37969.9	8753.79	32775.2	6560.98	15062.5	19635.2	15956.3	13005.6	111419
724	M104T37	104.1	104.1	104.1	36.8946	36.2582	37.5478	19	0	0	0	0	2	0	0	1	0	0	0	0	0	0	1	0	0	0	3		0.000227575	1.16689e-05	22166.2	27357.3	23647.5	26069.1	44385.1	24069.1	24538.8	34859.7	25737.7	22284.7	25467.6	19554	19869.5	22581.8	30318.3	22849	21352.7	18629.1	25953.4
725	M61T9	61	61	61	9.26958	8.9865	9.52927	16	3	0	0	0	0	0	0	3	2	0	2	1	0	0	0	0	0	0	4		0.000228315	1.16938e-05	3054.03	632.047	1181.91	2084.98	1625.7	1480.84	520.531	6860.71	5521.07	586.393	4356.42	5340.04	531.42	485.862	634.955	746.168	5247	1712.11	98192.2
726	M123T16_1	123.1	123.1	123.1	15.8426	15.2876	16.4508	33	3	0	1	0	0	0	1	0	0	1	4	3	1	0	0	2	2	4	5		0.000229689	1.17398e-05	9636.04	413.302	3491.78	1105.91	2071.29	297.839	3761.87	954.421	783.476	2511.34	50064.5	7303.1	967.53	606.208	1138.76	13312.6	9526.61	795849	23694.5
727	M162T18	162.1	162.1	162.1	17.9986	17.8516	18.1606	4	0	0	0	0	0	0	0	0	0	0	1	0	0	2	0	0	1	0	0		0.000229855	1.17453e-05	242.725	194.599	153.24	7813.6	358.032	108.647	224.297	271.423	300.815	174.678	762.908	156.88	79.5038	970.782	504.337	293.245	3977.24	594.506	233.985
728	M93T9	93.1	93.1	93.1	9.1591	9.08447	9.16662	21	0	0	0	4	2	0	0	0	2	1	5	1	0	0	1	2	1	0	2		0.000229917	1.17474e-05	514.159	1208.84	1401.5	36701.2	17831.5	1601.07	2547.52	3874.61	28349.3	7776.51	33571.9	13724.3	2391.3	674.557	11065.3	64799.6	10683.4	9466.88	8271.13
729	M268T29	268.2	268.2	268.2	28.9404	28.8783	28.9735	4	0	0	0	0	0	0	0	1	0	0	0	1	0	0	0	2	0	0	0		0.000231515	1.18006e-05	2240.16	485.642	3760.69	1776.56	4328.69	1260.95	1275	4085.42	518.133	5812.21	3160.45	1667.11	636.316	4097.39	2121.52	3654.86	1837.31	630.213	372.239
730	M122T12_2	122.1	122.1	122.1	11.6118	11.3059	11.9015	15	1	0	0	3	0	0	0	0	0	0	0	0	0	0	1	0	5	0	2		0.000232725	1.18407e-05	2282.77	91.3853	88.7963	62922	154.073	74.1572	154.691	201.636	543.428	57.2856	176.581	114.188	338.146	35.1115	7685.3	667.288	12074.1	307.314	13032.4
731	M57T25_2	57.1	57.1	57.1	25.3171	25.26	25.3248	5	1	0	0	0	0	0	0	0	0	0	0	0	0	2	0	0	0	0	2		0.000234783	1.19086e-05	116170	124303	78299.8	150237	91300.6	76991.1	81755.5	120599	111219	50456	144230	56866.2	50491.9	140483	148886	94974.6	78391.6	67005.5	122674
732	M109T17	109.1	109.1	109.1	17.3886	16.777	17.4635	17	0	0	1	4	1	0	0	0	0	0	0	1	0	0	0	0	3	1	2		0.000235312	1.1926e-05	2534.07	689.883	1903.78	172830	4808.75	756.907	2686.37	2496.88	1776.19	1654.88	4900.69	3291.23	1122.88	1030.22	2688.44	2563.03	19033.6	9526.02	12636.5
733	M145T21	145.1	145.1	145.1	20.7141	19.8269	21.5426	16	0	0	0	4	0	0	0	0	0	0	0	0	0	0	2	0	4	1	0		0.000236319	1.1959e-05	2720.2	2805.39	2378.12	8889.66	2827.43	2651.63	2871.06	2901.4	2955.71	2066.75	3791.26	1942.36	1832.24	2150.25	6258.89	3180.63	20964.2	3859.98	2605.83
734	M81T15_2	81.1	81.1	81.1	15.4964	15.2326	15.5671	22	1	0	0	0	0	0	0	0	1	2	5	2	0	0	0	0	3	4	2		0.000237065	1.19834e-05	6778.51	916.292	4815.11	11187.5	6178.89	877.001	6494.68	9982.09	5429.69	39967.3	250461	29585.1	2199.02	4526.97	3683.56	5753.94	41619.1	260132	28228.7
735	M129T15	129.1	129.1	129.1	14.7096	14.4242	14.9764	13	0	0	0	3	0	0	0	0	0	0	1	0	0	0	0	0	3	3	1		0.00023949	1.20623e-05	1311.19	747.611	462.474	19881.6	803.464	606.697	700.374	641.609	593.212	521.447	4780.35	461.122	626.264	513.217	2935.2	927.61	17495.5	10246.9	17614.3
736	M157T17	157.1	157.1	157.1	16.6604	16.5784	17.1121	18	0	0	1	0	0	0	1	3	3	1	2	0	0	0	0	0	1	0	2		0.000240177	1.20846e-05	532.263	287.872	609.036	1111.14	1115.13	185.863	1919.56	14668.6	10135.8	896	8590.58	658.28	188.832	439.948	1771.61	312.989	2794	518.457	2427.85
737	M88T29	88.1	88.1	88.1	28.6088	28.0699	29.0345	51	0	0	0	1	0	1	1	2	2	0	1	1	0	1	2	0	0	0	5		0.000240734	1.21026e-05	359298	443449	376976	414921	381204	453038	406986	380510	534783	350279	403121	342007	325168	361480	462969	381289	339992	328777	221081
738	M137T25	137.1	137.1	137.1	24.7911	24.3183	24.8826	7	0	0	0	0	1	0	0	0	0	0	4	0	0	0	0	0	2	0	0		0.000241699	1.21337e-05	5249.78	3186.36	2235.88	4208.85	6990.06	2262.17	3080.22	2649.12	3375.41	2385.84	11933.9	2417.94	1969.31	2214.16	3688.92	5290.82	9976.2	2881.29	2197.81
739	M105T13	105.1	105	105.1	13.0937	12.8041	13.2861	45	1	0	2	4	2	0	1	2	3	1	3	2	2	0	2	2	5	1	2		0.000243051	1.21772e-05	6039.22	384.581	27947.1	3.04957e+06	98630	1935.08	1986.47	58090.2	51941.2	2099.65	41213.2	47518.2	11886.5	377.108	31223.8	20797.9	160950	2.02773e+06	31241.7
740	M72T32_2	72.1	72.1	72.1	31.6481	31.4366	31.9169	62	3	0	2	0	2	1	3	1	0	2	4	3	2	3	3	1	5	4	1		0.000243104	1.21789e-05	661904	725061	658242	687284	719890	681591	751772	792882	697297	754357	639390	585866	587259	656936	779496	682704	624078	572161	497377
741	M110T12	110.1	110.1	110.1	11.8275	11.4216	12.4074	50	3	1	1	2	2	0	1	2	1	3	5	1	0	0	1	2	5	3	4		0.000243445	1.21899e-05	12946	3549	2878.32	4355.34	9854.38	1596.68	9909.28	9363.12	3362.17	10104.4	13915.6	3333.91	2253.69	1021.33	4792.96	12568.2	10968.4	5184.26	27512
742	M123T23	123.1	123.1	123.1	22.8602	22.6445	22.8764	5	0	0	0	0	0	0	0	0	0	0	0	0	0	0	0	0	2	3	0		0.000244398	1.22204e-05	1583.49	1753.69	1075.65	2219.47	1168.26	1047.8	1057.76	1159.39	1449.8	1072.28	2141.25	987.894	652.401	1187.59	2236.68	1385.79	22018.1	32839.7	1272.47
743	M194T30	194.1	194.1	194.1	29.8275	29.6865	29.9764	57	4	3	4	2	3	2	3	3	3	2	4	4	3	4	2	3	4	4	0		0.000245043	1.2241e-05	10170.5	25759.4	11559.5	9374.61	15106.5	13300.6	13531	13526.2	11394	9412.24	18623.3	8829.09	8331.06	9921.86	15081.3	16678.9	10877.9	13577.2	1094.99
744	M150T14	150.1	150.1	150.1	14.3673	14.1983	14.8241	13	0	0	0	1	0	0	0	1	0	0	1	0	0	0	0	0	5	4	0		0.00024607	1.22737e-05	187.966	39.3477	526.458	1199.7	196.745	34.0809	266.395	5316.69	133.098	129.151	613.774	174.557	101.407	1229.49	257.415	165.987	62194.1	69847.2	687.892
745	M65T13	65	65	65.1	12.7734	12.354	13.1123	15	1	0	0	4	0	0	1	0	0	1	1	1	1	0	0	0	2	0	2		0.000246211	1.22782e-05	2457.37	2156.22	2368.03	483122	2559.57	2082.8	2443.99	2933.31	2777.32	2367.54	3869.07	2795.7	2460.43	1810.96	2834.71	2548.13	25119.7	3057.97	282327
746	M73T7	73.1	73.1	73.1	7.39127	7.16665	7.53428	34	0	1	1	0	0	2	2	1	4	0	3	1	1	4	2	3	2	0	4		0.000247766	1.23275e-05	30422.2	57950	58582.8	48734.2	33649	70584.9	62930.5	46247.4	85198.3	61326.6	69188.9	33670.5	86968.9	166622	73620	80322.1	55389.5	34859.9	235937
747	M104T16	104.1	104	104.1	16.1094	15.4997	16.4416	29	1	2	0	0	1	1	2	2	1	0	1	1	0	1	3	2	0	2	4		0.000248451	1.23492e-05	6391.66	8640.54	3143.89	9033.04	10390.5	8038.5	11324.8	9262.73	6382.35	1240.69	11705.6	4340.24	2515.3	4033.55	13063.9	12077.6	6075.6	11276.9	16546.1
748	M43T36	43	43	43	35.8363	35.6	36.0386	16	0	0	1	0	0	0	0	0	0	0	0	2	1	2	0	0	4	0	0		0.000248668	1.2356e-05	513516	641540	523628	591812	548040	571187	540660	553034	587418	500712	591337	410112	620929	655944	581897	561620	598182	460101	401218
749	M141T13	141.1	141.1	141.1	13.1557	12.8192	13.5766	12	0	0	0	4	0	0	0	0	0	0	5	0	0	0	0	0	2	0	1		0.000251437	1.24431e-05	1264.1	410.608	377.419	13558.3	1069.22	330.713	1558.55	1041	523.098	1429.82	71635.2	894.828	562.107	480.659	1365.85	1282.23	7985.03	553.07	2348.41
750	M95T8	95.1	95.1	95.1	8.30523	7.96195	8.66588	32	1	0	0	4	0	0	0	3	1	0	4	1	0	2	0	2	3	4	2		0.000251799	1.24544e-05	8023.42	570.975	649.674	122337	566.07	1144.68	1760.02	15132.6	4906.35	832.28	52604	5349.81	6491.68	7251.69	2161	5949.1	23932.3	458288	47417.7
751	M98T16_2	98.1	98.1	98.1	15.5055	15.2503	15.5417	6	0	0	0	0	0	0	0	0	0	0	2	0	0	0	0	0	0	4	0		0.000252992	1.24916e-05	1123.06	617.412	636.272	1512.1	1502.4	474.51	1425.81	1563.32	650.468	699.863	85090.3	918.58	500.558	776.453	952.599	1470.01	1127.03	140155	1588.32
752	M56T10_1	56.1	56.1	56.1	10.4058	10.1007	10.8174	53	3	1	2	2	3	2	3	2	2	3	5	3	2	0	2	3	4	3	4		0.000255863	1.25808e-05	41834.6	17244.6	19699.3	33440.3	40589.3	17874.1	45459.9	39547	13263.5	43589.3	86289	18510.4	18918.3	9752.36	28415.9	52793.2	37202.4	23084.4	297590
753	M69T16	69.1	69.1	69.1	15.9919	15.7949	16.5785	70	4	1	3	4	3	1	3	3	2	2	5	3	1	0	1	3	5	4	5		0.000255981	1.25844e-05	127066	12788.6	24377.3	34327.7	69298.9	13072.4	73462.4	49712.7	15233.8	36757.5	92940.1	41385.5	13989.7	6453.82	19828.9	126423	108340	3.00801e+07	81173.6
754	M136T13	136	136	136.2	12.7697	12.1272	13.2961	90	3	2	3	4	3	4	4	3	4	3	5	4	2	4	2	3	4	4	4		0.00025721	1.26223e-05	20297.8	24441	25449.3	225118	25311.9	24630.3	22964.8	22620.5	20962.3	21633.2	27587.4	20755.1	17973	20980.3	32224.4	27378.4	21340.7	21017.7	39119.7
755	M117T21	117.1	117.1	117.1	21.441	21.4241	21.5159	12	0	0	0	1	0	1	0	3	0	0	0	0	0	2	0	2	1	2	0		0.000257481	1.26306e-05	41413.8	47620	42645.2	71739.3	42941	57221.1	41781.1	83028.1	49165.9	37759	49149.2	35878.6	35169	59402.8	46491.9	64477.8	55064.7	676813	34697.7
756	M71T14_1	71.1	71.1	71.1	14.356	14.1543	14.4319	10	1	0	0	2	1	0	1	0	0	0	0	1	0	0	0	0	2	2	0		0.000257629	1.26352e-05	23580.1	11474.4	11377.5	38803.3	27478.3	11433.4	23279.6	23175.3	17142.5	10743.6	44456.7	17696.1	8619.89	12138.2	25129.9	29818.3	37879	17389.9	11344
757	M83T12	83.1	83.1	83.1	11.626	10.8136	12.0476	80	4	0	2	3	3	0	3	3	2	2	5	2	2	1	2	3	5	3	5		0.000259042	1.26786e-05	32080	6228.78	15886.2	22208.2	24779.7	5432.91	18374.9	25892.6	24801.3	23594.8	24842.4	10313.4	14154.8	9536.54	12029.8	62853.2	58581.8	16593.8	1.66033e+06
758	M91T7	91.1	91	91.1	6.95419	6.71175	7.16755	24	0	0	1	0	0	1	1	0	0	0	0	0	1	1	1	1	5	4	5		0.000259448	1.2691e-05	1837.55	1275.17	11966.4	18825.4	1391.88	53659.7	132919	4198.94	3091.85	875.164	5986.63	1208.43	282662	1565.75	108765	19899.2	1.14599e+06	471638	65180.7
759	M41T9	41	41	41.1	9.27117	8.74722	9.81655	23	2	0	3	1	1	0	1	0	1	1	1	2	0	1	1	3	2	2	1		0.000260094	1.27107e-05	58217.5	17133.7	39158.3	220468	47180.7	24505.8	23683.5	64485.9	76012.8	26129	91716.5	41507.2	36437.9	16749.8	38480.6	860495	94516.8	34316.7	293634
760	M96T15	96.1	96.1	96.1	14.8597	14.5425	15.2364	14	0	0	0	4	0	0	0	0	0	0	0	0	0	0	1	0	2	3	1		0.000260234	1.2715e-05	2038.88	714.66	813.275	31487	2177.24	698.353	1979.84	1875.97	1465.11	1942.44	6811.14	1438.64	894.825	765.523	3167.14	2559.71	12210.6	16301.8	21884.9
761	M83T7	83.1	83.1	83.1	7.43323	7.21563	7.6222	12	0	0	0	0	0	0	0	0	0	0	0	0	1	0	0	0	2	3	4		0.000262672	1.27892e-05	882.827	912.478	492.139	727.119	674.122	1411.74	2259.92	1270.11	665.885	311.501	1671.12	593.041	13872.3	876.479	3313.72	3261.78	27184.6	96969.6	109223
762	M43T17	43	43	43	17.299	17.0072	17.7375	115	3	3	2	4	3	4	4	3	4	0	5	4	1	4	3	3	5	4	4		0.000263527	1.2815e-05	82963.8	127871	60799.7	277376	120804	103179	122095	111727	100727	33639	154821	71464.2	50517.4	82926.9	131371	128138	100441	91327.6	82835.1
763	M81T13	81.1	81.1	81.1	13.09	12.6743	13.1928	38	1	0	1	4	2	1	0	2	2	1	3	2	2	0	2	1	3	0	2		0.000264478	1.28438e-05	9501.52	789.844	18352.8	1.79073e+06	67383.4	1843.7	2574.09	40145.8	30879	5502.76	50728.1	32696.8	17017.4	743.919	24231.1	10423	86998	3223.38	37346
764	M154T15	154.1	154.1	154.2	15.2457	15.1227	15.5417	8	0	0	0	0	0	0	1	0	0	0	2	0	0	0	0	0	1	3	0		0.000264587	1.2847e-05	285.156	257.594	220.797	239.301	338.626	157.775	1464.27	346.205	257.097	621.369	5427.56	124.838	130.753	158.344	277.138	340.327	1074.05	40315.7	586.076
765	M54T8	54.1	54	54.1	8.30147	8.0469	8.64532	18	0	0	0	4	0	0	0	0	1	0	2	0	0	1	0	0	1	4	4		0.000264875	1.28557e-05	4375.05	570.615	384.435	72865.2	322.391	687.053	709.87	6004.47	1608.14	558.583	55379.9	2418.57	749.688	3647.07	725.098	1663.35	7027.99	244504	446895
766	M91T21	91.1	91	91.1	20.8536	20.5766	21.4306	16	1	0	0	2	0	1	0	0	0	0	3	0	0	0	0	1	0	4	3		0.000265668	1.28796e-05	3941.46	2119.42	2021.43	33137.6	2509.31	4843.79	2143.28	2394.62	2243.76	1375.66	26974.5	1534.58	1120.98	1943.76	4161.82	6312.64	15911.8	113277	7357.3
767	M93T18_1	93.1	93	93.1	17.8555	17.8378	18.1417	9	0	0	0	2	0	0	0	0	0	1	2	0	0	2	0	0	1	0	0		0.000265957	1.28883e-05	1008.03	405.998	373.76	29198.5	3557.06	384.368	915.496	772.371	1732.54	1388.2	8866.13	526.877	408.573	16693.9	3433.1	3703.75	10730.4	15168.3	859.123
768	M148T21	148.1	148	148.1	20.8061	20.5967	21.3486	8	0	0	0	1	1	0	0	0	0	0	0	0	0	0	1	0	2	3	0		0.000267465	1.29335e-05	688.813	1090.25	721.057	2381.72	1752.94	753.933	910.64	937.858	1090.51	614.567	1027.69	771.155	429.548	560.11	5229.17	931.575	12533.3	28450.9	585.671
769	M109T20	109.1	109.1	109.1	19.7163	19.7041	19.9753	7	0	0	0	0	0	0	0	0	0	0	2	1	0	0	3	0	1	0	0		0.000267541	1.29357e-05	2016.94	958.039	893.038	4249.6	1679.95	746.4	1653.65	1242.68	1367.35	1120.98	8759	2670.91	965.42	773.084	29457.5	1769.8	8027.9	2691.28	1264.9
770	M37T8	37	37	37.1	8.29272	8.10368	8.32395	8	0	0	0	0	0	0	0	0	0	0	3	0	0	1	0	0	0	3	1		0.000268679	1.29697e-05	1077.88	819.679	621.597	6506.46	743.104	670.187	639.636	1485.27	836.533	666.372	11916.9	747.174	522.489	1047.46	983.758	856.759	1548.91	12187.5	2375.02
771	M72T26	72.1	72.1	72.1	25.9348	25.1609	26.3008	63	1	0	0	0	0	1	2	1	0	0	0	2	1	2	1	0	4	0	0		0.00026894	1.29775e-05	317367	400448	334947	380527	344434	376182	267565	581239	388713	312404	383682	380344	341534	274785	342227	346874	266105	280894	257886
772	M139T17_1	139.1	139.1	139.1	17.0132	16.9083	17.018	4	0	0	0	1	0	0	0	0	0	0	0	0	0	0	0	0	0	3	0		0.000269925	1.30067e-05	471.797	383.175	332.878	1419.85	973.222	235.544	402.372	477.051	302.402	248.242	949.837	364.56	258.145	264.001	493.105	546.633	558.029	5244.23	471.646
773	M190T14	190.2	190.1	190.2	13.9422	13.8934	14.1956	6	0	0	0	3	0	0	0	0	0	0	0	0	0	0	1	0	1	0	0		0.000270453	1.30224e-05	13.852	0	0	36914.1	38.5738	0	23.4109	32.352	78.6452	0	111.267	58.928	9.86079	0	37563.8	5.12088	5029.03	117.989	27.8892
774	M68T9	68.1	68	68.1	9.2723	8.74338	9.81087	73	4	0	2	3	2	1	1	3	2	0	4	3	0	0	1	3	5	3	5		0.000270746	1.30311e-05	27355.9	368.563	8361.45	23206.7	15046.4	11887.2	12599	72462.3	54915.9	873.836	46649	58983.5	2482.34	364.273	6124.44	42497.9	68113.2	18591.9	90075
775	M120T12_2	120.1	120.1	120.1	11.618	11.0857	11.7819	19	0	0	0	4	0	0	0	0	1	0	0	1	0	0	0	0	5	3	0		0.000272088	1.30777e-05	235.411	62.0695	267.394	30500.8	153.714	116.853	128.271	401.942	6790.97	55.9995	151.473	3343.51	212.995	28.5165	388.247	1435.66	23210	6624.95	545.263
776	M43T31	43	43	43	30.9904	30.449	31.4594	31	1	0	1	0	0	0	0	0	0	0	0	4	0	1	0	0	3	0	0		0.000274079	1.31466e-05	558584	721309	555977	637399	603790	626853	615629	635332	662583	557778	667355	358845	500843	678270	642782	633684	560648	512446	455041
777	M139T15	139.1	139.1	139.1	15.4804	15.122	15.8337	10	0	0	0	0	0	0	2	0	0	0	2	0	0	0	0	0	1	4	0		0.000274994	1.31782e-05	251.85	96.6831	137.821	303.844	492.177	119.768	4487.04	195.584	167.317	150.399	4421.15	359.928	125.022	109.488	362.675	447.683	1834.1	271335	1305.85
778	M119T7_1	119.1	119.1	119.1	6.92814	6.6315	7.14633	18	0	0	0	0	0	0	1	0	0	0	0	0	1	0	1	0	5	3	0		0.000276081	1.32157e-05	588.528	816.605	721.521	904.996	656.458	3751.14	6223.47	647.704	777.232	462.383	767.013	467.224	21066.2	455.787	5319.01	863.593	58284.2	10662.7	1905.86
779	M40T17	40	40	40	17.3832	17.3761	17.3979	13	1	0	0	1	0	0	1	0	0	1	3	2	0	0	1	2	1	0	0		0.000277406	1.32612e-05	12273.7	8325.7	7042.97	24124.3	12121.6	9291.83	11269.2	10626.5	8687.75	9716.31	24601.4	11635.9	4442.79	8035.21	14022.8	23539.8	13736.3	8426.11	6821.19
780	M147T21	147.1	147.1	147.1	20.6029	20.2881	21.5502	36	0	1	0	3	2	0	0	1	2	0	3	0	0	1	1	2	3	3	5		0.000278421	1.3296e-05	20047.3	23939.1	11746.4	45560	26091.7	20830.3	22486.4	25348.2	21199.9	8347.87	33185.2	15342.6	9398.82	16331.9	33078.2	33614.9	28804.4	37624.4	42348.6
781	M43T35	43	43	43	34.9975	34.338	35.5695	43	0	0	1	0	0	0	0	0	0	0	0	3	1	0	0	0	5	0	0		0.000282862	1.34474e-05	349656	454168	420608	414257	400229	401480	411852	356479	427295	366697	415505	489932	242640	366669	384566	365829	483040	326929	282764
782	M134T16_2	134.1	134.1	134.1	15.7018	15.4994	15.8286	58	3	3	1	4	3	4	4	3	2	2	5	2	1	1	3	3	5	3	5		0.000283601	1.34725e-05	18771	28566.5	9974.04	28409.2	29745	26112.7	33088.9	28535.3	22610.4	5090.63	35461	14438.7	8646.34	15972.4	34648.4	32880.8	27597.3	15449	33013.2
783	M165T19	165.1	165.1	165.1	18.9206	18.1379	19.0758	15	1	0	0	1	0	0	0	1	0	0	2	1	0	0	1	1	4	0	0		0.000285996	1.35535e-05	1551.37	591.486	3366.9	1716.01	1468.2	595.424	1425.33	2844.16	878.301	1083.95	6158.44	5410.52	1522.39	1115.01	5044.99	2560.59	8203	2290.19	772.035
784	M128T7_2	128.1	128.1	128.1	6.90348	6.87518	6.93245	4	0	0	0	0	0	0	0	0	0	0	0	0	0	0	0	0	0	0	4		0.000287033	1.35884e-05	264.201	230.374	151.63	358.013	297.048	312.027	220.512	293.993	279.697	224.093	441.264	154.119	319.463	269.184	260.491	335.34	1254.42	468.211	21383.5
785	M160T19	160.1	160.1	160.1	18.9312	18.7128	19.2283	6	0	0	0	1	0	0	0	0	0	0	0	0	0	0	3	0	2	0	0		0.000290301	1.3698e-05	340.328	210.003	179.854	5067.45	399.421	254.78	227.88	200.406	626.325	111.063	397.793	193.676	91.2861	200.349	35401.1	268.368	1325.02	175.388	169.059
786	M107T10	107.1	107.1	107.1	10.1007	10.0626	10.1119	7	0	0	0	0	0	0	0	0	0	0	0	0	0	0	0	0	4	3	0		0.000290855	1.37165e-05	373.856	240.052	370.237	1551.03	389.695	367.771	500.078	373.455	364.69	434.722	797.563	279.867	1190.61	324.988	806.819	847.706	25007.1	7651.52	509.144
787	M123T17	123.1	123	123.1	16.9294	16.8343	17.0585	6	0	0	0	2	0	0	0	0	0	0	0	1	0	1	0	0	2	0	0		0.000292201	1.37614e-05	2671.45	702.173	1193.42	17202.2	4976.59	579.118	1671.47	2443.09	1435.53	1219.35	4197.16	4911.72	1302.67	948.423	2665.97	2500.37	6294.02	9729.99	2467.31
788	M97T14	97.1	97.1	97.1	13.7435	13.6207	13.9812	17	2	0	0	3	0	0	1	1	0	0	1	1	1	0	1	0	4	0	0		0.000292743	1.37795e-05	11048.4	1450.14	3003.78	21745	7534.69	1319.98	6585.7	5584.41	2867.71	4688.35	14491.7	3205.25	6554.21	1457.2	10410.4	8423.23	13076	3651.95	22216.9
789	M138T13	138	138	138	12.7697	12.762	12.7761	72	4	3	4	4	3	4	4	3	4	3	5	4	3	4	3	3	5	4	5		0.000293939	1.38193e-05	18780.2	21860.6	22654.3	23408.6	22247.4	20851.5	19969.1	19750	18279.4	18952.6	24327.7	17853	16187.9	18072.1	29116.6	23819.9	19002.1	18167.1	30583.1
790	M41T13	41.1	41	41.1	12.7975	12.3537	13.1928	21	0	0	0	4	0	0	0	0	1	0	2	1	2	1	2	1	2	1	1		0.000293992	1.3821e-05	67207.3	122768	131444	1.96073e+06	112732	126642	118813	164558	147765	114697	139526	66700.5	44829.9	99911.8	239710	174321	105258	120786	638379
791	M121T9_1	121.1	121.1	121.1	9.16023	9.08115	9.52515	38	0	0	1	4	3	0	0	2	4	3	5	1	2	0	1	2	4	3	2		0.000294628	1.38421e-05	492.729	789.327	2560	57110.9	26902.7	864.126	2653.28	5120.89	46907.6	14261.3	52813.9	22796.8	5705.94	548.82	14977.4	107870	16022.7	12484.2	14319.7
792	M176T13	176.2	176.1	176.2	13.0923	12.8077	13.1158	14	1	0	0	4	2	0	0	0	1	0	1	1	0	0	0	0	4	0	0		0.000296239	1.38954e-05	462.994	24.766	2587.41	482189	12003.8	110.394	126.078	5248.12	4422.78	0	3545.14	5111.95	637.576	3.96585	1753.52	1005.55	7092.69	121.559	46.3416
793	M137T11_1	137.1	137.1	137.1	10.7757	10.7255	11.092	11	1	0	0	0	0	0	0	1	0	0	0	0	0	0	0	0	5	0	2		0.000296707	1.39109e-05	1055.36	22.4374	33.9851	218.35	21.6203	89.1726	433.693	794.193	27.5586	25.9688	144.878	44.3326	777.564	24.0902	385.01	178.599	18092.8	57.2078	7902.72
794	M68T15	68.1	68.1	68.1	14.822	14.4319	15.2503	24	0	0	0	4	0	0	0	1	0	1	2	0	0	0	1	0	5	4	1		0.000297101	1.39239e-05	8222	944.982	2040.84	48799.1	6637.09	2072.55	5407.41	25262.9	6884.14	6692.95	19872.7	1970.63	2115.32	2653.12	21651.9	7166.6	27050.9	180430	19739
795	M53T17	53	53	53	16.875	16.5747	17.1243	8	2	0	0	0	0	0	1	1	0	0	0	3	0	0	0	0	1	0	0		0.000297249	1.39288e-05	3452.45	800.695	715.724	5664.44	2227.37	865.367	2595.92	2937.78	1253.59	993.36	2833.14	4536.29	830.289	958.774	1627.13	1314.67	3687.94	7340.68	1224.18
796	M79T15	79.1	79	79.1	14.5544	14.1793	15.087	49	3	0	0	4	1	0	1	3	2	0	5	1	0	0	1	2	5	4	2		0.000301018	1.40541e-05	42367	6710.95	5681	160358	9953.01	1531.37	24602	52209.1	40785.8	13367	104166	43151.6	1616.07	7996.27	93835.9	100934	441876	91436.6	35478.6
797	M62T14	62	62	62	13.6456	13.1774	14.4354	13	0	0	0	2	0	0	0	0	0	0	4	1	0	0	2	0	0	3	0		0.000302514	1.41035e-05	191.054	153.63	114.417	2127.86	126.363	155.341	216.473	171.393	157.846	213.502	18236.2	814.118	118.229	120.118	23555.7	216.644	642.142	10683	985.044
798	M133T13	133.1	133.1	133.1	13.0923	12.5005	13.5127	64	3	0	2	4	2	1	1	3	4	0	3	3	2	0	3	2	5	3	3		0.000303195	1.4126e-05	16636.3	5994.08	51581.3	5.19839e+06	172010	8819.13	8881.58	103168	80556.4	5766.66	59228.9	87078.1	25064.8	5685.04	52670.5	26407.2	113686	17604.7	32538
799	M147T30	147.1	147.1	147.1	30.3156	29.6102	30.9294	157	0	1	1	2	2	1	1	1	2	0	3	2	0	1	2	1	0	0	5		0.000303408	1.4133e-05	124154	169512	129288	150443	182106	144198	134818	149090	140728	123550	147445	109362	111647	125267	183937	178515	121142	113726	150430
800	M207T33	207.1	207.1	207.1	33.1891	32.9433	33.5907	10	0	0	0	0	0	0	0	0	0	0	0	0	0	0	0	0	0	0	3		0.00030607	1.42206e-05	11607.9	30789.3	12474.3	12945.8	11068.3	11578.4	11925.4	11702.8	17446.7	11352.7	15252.1	10579.3	10631.9	11480.2	12186	11476.7	10978	10729.3	27145.8
801	M103T15	103.1	103.1	103.1	14.6936	14.3291	14.9628	14	0	1	0	4	0	0	0	0	0	0	0	0	0	0	1	0	3	3	0		0.000306285	1.42276e-05	7971.19	11836	6721.95	51862.5	8620.43	8467.27	9184.94	7705.04	7636.17	5972.55	8566.96	6364.9	6516.95	6914.01	23196.3	10312.7	37918.4	58279	11253.2
802	M135T19	135.1	135.1	135.1	19.1859	18.9157	19.8269	12	0	0	0	0	0	0	0	0	0	0	1	0	0	0	2	0	4	1	0		0.000307175	1.42568e-05	1492.19	1822.8	939.155	6468.27	2462.84	1227.16	2056.4	1841.53	1920.31	1202.17	10134.3	1243.84	1017.93	1346.96	7975.65	2599.97	20400.3	2194.73	2502.49
803	M53T18	53	53	53	17.6972	17.387	18.0018	5	1	0	0	1	0	0	0	0	0	0	0	0	0	0	0	0	1	2	0		0.000309647	1.43375e-05	2427.03	1171.3	890.862	5247.39	1314.49	895.741	1080.61	1335.84	1264.45	910.476	1947.94	989.24	764.285	1161.38	1626.71	1291.59	5469.32	6876.67	1560.17
804	M63T7	63	63	63	6.95847	6.92448	7.14715	10	0	0	0	0	0	1	1	0	0	0	0	0	1	0	1	0	4	2	0		0.000313197	1.44528e-05	260.667	242.908	358.082	736.165	206.592	1892.61	4638.32	398.811	383.579	99.9457	431.678	161.019	10098.4	161.014	3875.05	823.915	40111.6	19410.3	1663.57
805	M72T34	72.1	72.1	72.1	34.3341	33.8233	34.8616	161	2	0	3	0	0	1	3	1	0	1	2	2	1	2	1	1	5	1	1		0.000313289	1.44557e-05	396089	471728	180775	449435	399774	321219	435333	373361	453605	415690	598409	276194	288088	394713	551520	381857	475493	319982	313192
806	M135T9	135.1	135.1	135.1	9.16013	9.01723	9.37645	57	2	2	2	3	3	2	3	2	4	2	5	2	2	1	2	3	4	2	1		0.000313781	1.44717e-05	3909.91	8699.85	8144.19	126141	63676.8	8305.43	11373	13888.7	108030	31637.2	121443	53051.7	7656.48	3031.91	39477.1	248727	39482.4	7482.87	22151.6
807	M127T12	127.1	127.1	127.1	11.893	11.5858	12.3589	13	0	0	0	0	0	0	0	0	0	0	2	1	0	0	1	0	2	1	5		0.000313817	1.44728e-05	4175.71	1287.09	1134.5	4907.67	4297.64	802.768	3110.54	2925.11	2251.93	1447.21	5095.67	2640.38	1082.62	1717.85	5639.97	4911.14	3439.87	3636.23	145557
808	M61T8	61	61	61	8.312	7.82702	8.64605	22	1	0	0	1	0	0	0	2	2	0	5	3	0	0	0	0	1	3	0		0.000317688	1.45975e-05	2034.57	938.077	626.964	5646.41	743.988	888.269	792.012	4258.84	7148.14	577.448	17647.3	3968.35	526.803	828.695	1090.59	733.793	2159.32	11801.7	2369.2
809	M119T8	119.1	119.1	119.1	8.32017	7.82593	8.57597	71	3	0	1	4	2	1	3	3	3	0	5	1	2	3	1	2	5	4	5		0.000317693	1.45976e-05	23677	576.911	4869.98	348030	7559.27	12569	32229.4	39743.7	17589.7	2182.47	77093.4	13510.5	15148.1	20913.8	29293	10808.3	49397	1.35603e+06	284872
810	M72T13	72.1	72.1	72.1	12.7663	11.8278	12.7778	76	4	2	4	3	3	4	3	3	4	3	5	4	3	4	3	3	2	4	4		0.000317956	1.46061e-05	17132.9	22272.9	16860.6	21267	19469.1	18079.4	18993.7	18265.9	18142.8	24011.1	29309.5	17055.8	14400.1	15134.3	23193.6	20313.5	17577	16096.9	26941.7
811	M148T16_2	148.1	148.1	148.1	15.7017	15.4035	15.8401	71	4	3	4	4	3	4	4	3	4	2	5	4	2	4	3	3	5	4	5		0.000318772	1.46322e-05	62586.8	97676.2	37099	91435.4	99771.3	84946.6	109232	94683.2	77976.8	13571.2	110400	48963.3	30503.2	55960.7	111328	109400	70466.7	61745.9	110001
812	M208T30	208.1	208.1	208.1	29.8505	29.717	29.9344	13	1	0	0	2	1	0	1	0	1	0	1	1	0	0	1	3	0	1	0		0.000319745	1.46633e-05	8455.48	7413.39	9244.82	10752.7	10956.5	9975.48	10168	10032.9	8133.1	7857.68	11459.9	5399.53	5346.68	7637.78	11383.4	12017.9	7188.43	7157.05	9744.85
813	M41T14	41	41	41.1	13.8902	13.627	14.0526	13	0	0	0	4	0	0	0	0	0	0	1	1	1	0	1	0	3	1	1		0.000323399	1.47797e-05	14925.7	12184.5	13102.8	2.47832e+06	16104.6	11254.3	17523.6	20903	15839.1	14906.1	27425.4	29772.8	16984.7	11470.9	73701.7	16125.8	72094.1	58546.3	33403.6
814	M228T24	228.1	228.1	228.1	24.3114	24.3071	24.3172	4	0	0	0	0	0	0	0	0	0	0	0	0	0	0	0	0	0	4	0		0.000323878	1.47949e-05	552.63	553.553	459.786	359.939	665.759	536.654	499.848	411.542	554.795	512.281	554.456	512.66	324.826	654.464	426.182	500.873	819.5	1.4304e+06	261.439
815	M109T8	109.1	109.1	109.1	8.30873	7.98085	8.74338	22	1	0	0	4	0	0	0	1	0	0	2	1	0	1	0	0	3	4	2		0.000324059	1.48006e-05	2699.39	299.198	307.38	44129.1	480.319	677.962	921.002	4373.74	1891.37	472.585	12927.1	1917.44	4047.95	2350.87	1311.4	1898.52	10806.4	200735	6457.39
816	M119T9	119.1	119.1	119.1	9.03704	8.71263	9.37753	132	3	3	3	4	3	4	4	3	4	0	5	4	2	4	3	3	5	4	4		0.000324634	1.48189e-05	44411.3	134019	47483.2	126052	108659	111004	105168	71691.2	92539.1	1014.12	120321	50687.6	42364.2	46797.3	144573	151506	96304.5	61101.8	64697.9
817	M40T13	40	40	40.1	12.7738	12.3562	13.1123	19	1	0	0	4	0	0	0	1	1	0	2	1	0	1	1	0	2	0	1		0.000327644	1.49139e-05	12365.9	15586.7	14608.2	141318	12035.9	13302.9	12502.6	17266	13745.5	11538.7	17097.6	12133.7	10071.3	11786.2	16598.7	15094.2	20498.5	11513.3	70696.3
818	M77T13	77.1	77	77.1	13.099	13.0867	13.2997	9	1	0	0	4	0	1	0	0	1	0	0	0	0	0	0	0	0	2	0		0.000327769	1.49178e-05	2357.37	458.791	10542.7	1.41627e+06	44213.5	1267.16	883.931	20761.9	14655.4	398.656	13994.8	9777.13	3244.3	321.117	9724.3	2278.76	13080.9	1.88024e+06	6568.15
819	M130T8	130.1	130.1	130.1	8.07426	8.04327	8.10315	4	0	0	0	0	0	0	0	0	0	0	0	0	0	0	0	0	0	0	4		0.000329822	1.49823e-05	128.793	222.094	143.397	179.294	176.364	128.784	106.906	174.193	160.672	109.526	248.371	92.2681	95.4217	108.497	191.904	139.301	108.435	73.2338	10515.7
820	M63T23	63	63	63	23.0858	23.0786	23.0929	2	0	0	0	0	0	0	0	0	0	0	0	0	0	0	0	0	0	2	0		0.000329826	1.49825e-05	1077.49	1410.07	1110.3	1562.34	1428.57	943.047	1339.29	1331.9	1148.47	963.079	1654.73	1015.53	855.007	1193.66	1331.4	1416.89	1433.31	34308.1	729.528
821	M82T13	82.1	82.1	82.1	13.0943	12.6642	13.4479	41	1	0	1	4	2	0	2	2	2	1	5	2	1	0	0	0	5	1	4		0.000332133	1.50546e-05	13154.1	690.172	6363.77	579724	23666.2	924.827	6208.55	20044.9	10973.1	5326.51	28956.9	11734.9	10698.6	773.576	9484.78	7555.5	41723.8	20964.2	27051.9
822	M97T10	97.1	97.1	97.1	9.74288	9.35757	10.196	27	2	0	0	0	0	0	1	0	1	0	3	2	2	0	0	1	3	0	5		0.000334017	1.51133e-05	18730	883.99	1053.52	2458.85	1554.52	2025.21	7691.88	3746.97	2472.12	2917.69	12667.7	3726.76	15849.9	1003.49	7303.58	4975.19	38343.8	2167.85	237156
823	M149T17_1	149.1	149.1	149.1	16.918	16.9009	16.9227	11	2	0	0	0	1	0	0	2	0	0	0	2	0	0	0	0	3	1	0		0.000334272	1.51213e-05	7642.93	501.703	557.396	4466.97	2684.01	678.229	737.008	5328.32	1820.45	759.256	1597.22	7393.79	446.765	356.939	1408.96	1239	9911.97	2059.02	603.689
824	M180T19	180.1	180.1	180.1	18.7669	18.4205	19.0066	11	0	0	0	1	0	0	0	1	0	1	5	0	0	0	0	0	1	0	1		0.000334903	1.51409e-05	244.645	86.4267	243.067	514.194	109.543	65.1247	252.86	764.956	103.593	820.807	11915.1	67.8222	77.9766	60.8524	196.699	139.63	550.962	72.8386	1429.06
825	M80T12_1	80.1	80	80.1	12.355	12.1104	12.4111	26	3	0	0	3	0	0	0	2	2	1	5	2	0	0	0	1	3	3	1		0.000342872	1.54188e-05	49928.4	184.519	3350.68	60550.1	564.968	9239.09	1255.18	31598.8	59727.3	12413.3	211457	4568.48	724.059	744.962	3565.17	26077.4	36721.7	181754	8226.33
826	M102T7_1	102.1	102.1	102.1	7.4509	7.39173	7.60702	11	0	0	0	0	0	0	0	0	0	0	0	0	0	0	0	0	4	0	5		0.000343269	1.54326e-05	1353.85	1406.79	1749.68	1976.27	1522.04	1343.91	2341.95	1426.91	1259.63	1665.26	1737.37	1370.76	1485.13	1625.3	2104.45	1740.76	19260.2	1669.9	97511
827	M173T16	173.1	173.1	173.1	16.1247	16.1133	16.2953	16	2	0	0	0	1	0	1	0	0	2	3	0	0	0	0	2	2	1	0		0.000345997	1.5527e-05	10146.7	525.858	1529.4	2065.49	6010.25	405.276	5252.34	1271.38	761.549	8563.52	8467.87	2560.29	680.875	1131.23	2877.33	14231.8	7201.91	1282.05	1450.52
828	M66T9	66.1	66	66.1	9.26952	8.89243	9.5703	10	0	0	0	0	0	1	0	3	0	0	1	2	0	0	0	1	2	0	0		0.000346975	1.55608e-05	4011.98	79.2984	1307.35	2286.46	1502.8	1693.98	211.178	14281.5	10531.4	79.8977	4978.77	11401.3	553.54	54.7308	228.532	21194.5	14514.9	2681.69	821.195
829	M137T11_2	137.1	137	137.1	11.4178	11.4101	11.5953	5	0	0	0	0	0	0	0	1	2	0	0	0	0	0	1	0	1	0	0		0.000348467	1.56122e-05	1942.8	144.565	37.8389	1888.08	272.624	377.88	252.765	5357.98	3117.61	164.513	1450.18	61.3334	381.959	140.516	1312.48	225.337	4539.02	691.634	198.516
830	M44T8	44.1	44.1	44.1	8.30323	8.0469	8.33488	10	0	0	0	3	0	0	0	0	0	0	2	0	0	0	0	0	0	4	1		0.000349867	1.56603e-05	1590.86	2062.82	695.446	24392.2	786.145	2567.36	1063.01	2871.63	1326.86	425.855	19921.8	1896.87	402.008	742.55	1832.04	1350.31	2381.43	68977	12653.4
831	M127T13	127.1	127.1	127.1	13.173	13.09	13.9812	11	0	0	0	3	2	0	0	0	0	0	3	0	0	0	1	0	0	1	1		0.000351038	1.57005e-05	2168.47	637.698	1024.96	19339.4	3575.14	926.915	1619.2	1428.78	1130.75	452.403	9629	1358.17	755.896	892.8	5631.94	2438.4	2273.06	1285.66	7585.04
832	M110T17_2	110.1	110.1	110.1	16.9178	16.9158	16.9227	6	2	0	0	0	0	0	0	0	0	0	0	2	0	0	0	0	1	1	0		0.000351422	1.57137e-05	7369.95	360.321	595.82	5706.19	3157.24	663.555	1072.29	4298.5	1740.74	488.104	2179.99	7007.93	346.25	570.093	1318.46	1022.17	8455.83	2240.61	716.124
833	M139T12	139.1	139.1	139.1	12.3589	11.8676	12.6702	13	1	0	0	0	0	0	0	0	0	0	4	0	0	0	1	0	0	3	2		0.000355779	1.58627e-05	3559.13	156.126	362.532	956.869	194.225	416.796	298.44	992.795	492.347	954.556	15961.4	349.433	302.027	174.813	3962.85	1780.03	2676.37	13586.4	15847.8
834	M145T15	145.1	145.1	145.1	14.9363	14.9056	15.1116	7	0	0	0	1	0	0	0	0	2	0	0	1	0	0	0	0	0	3	0		0.000356118	1.58743e-05	419.037	422.778	309.87	3728.12	621.823	408.079	392.026	1014.76	5146.48	247.634	1182.17	2733.04	334.286	311.275	1426.99	515.556	2462.11	8843.15	692.193
835	M116T7	116.1	116.1	116.1	7.44703	7.42223	7.4718	9	0	0	0	0	0	0	0	0	0	0	0	0	0	0	0	0	4	0	5		0.000356254	1.58789e-05	577.785	627.526	714.241	895.3	642.135	667.692	1298.51	824.985	719.872	631.169	933.52	537.078	651.667	618.845	797.43	755.701	19549.7	824.975	61988.1
836	M95T20	95.1	95.1	95.1	19.7358	19.7041	19.9753	9	0	0	0	0	0	0	0	0	0	0	3	0	0	1	2	0	3	0	0		0.000360719	1.60307e-05	1843.68	1301.61	948.215	5080.41	1635.48	942.231	2053.16	1460.14	1644.41	1112.19	14291.5	2465.4	605.733	2829.71	20600.6	2166.61	16286.4	1813.58	3184.23
837	M98T8_2	98.1	98.1	98.1	7.62887	7.61862	7.91322	9	2	0	0	0	0	0	1	1	0	0	0	0	1	0	1	0	1	1	0		0.000361352	1.60521e-05	3499.85	443.823	640.719	1299.29	1227.02	1931.45	6053.61	3039.51	609.295	815.985	3521.05	1145.42	14114.5	817.992	6445.26	4006.68	16275.9	8185.81	576.374
838	M97T11	97.1	97.1	97.1	11.1493	11.0642	11.3261	17	2	0	1	1	0	0	0	0	0	0	3	1	1	1	1	0	1	2	3		0.000365113	1.61791e-05	14261.4	2916.96	3766.11	6524.5	5845.13	3670.21	9217.31	6833.91	3806.84	3577.02	15797.1	3240.68	9359.58	3092.19	9522.65	9101.13	14829	4068.65	6.85952e+06
839	M110T17_1	110.1	110.1	110.1	17.4062	17.2228	17.413	7	0	0	0	4	1	0	0	0	0	0	0	0	0	0	0	0	2	0	0		0.000367164	1.62481e-05	853.791	418.099	832.185	101073	2743.13	400.711	1259.95	1328.81	929.288	611.361	1743.37	979.136	446.811	425.369	1042.58	1028.91	9781.42	1541.82	2658.23
840	M120T17	120.1	120	120.1	17.4062	16.9087	17.7301	11	0	0	0	4	1	0	0	0	0	0	1	0	0	0	0	0	2	2	0		0.000368791	1.63027e-05	411.615	416.093	423.748	64575.7	2374.79	289.326	570.65	613.138	569.569	155.315	5632.88	475.919	305.786	254.142	975.543	672.02	5855.08	3642.43	1661.16
841	M96T16_1	96.1	96.1	96.1	15.541	15.4626	15.8299	7	0	0	0	0	0	0	0	0	0	0	2	0	0	0	0	1	0	4	0		0.000376344	1.65547e-05	1567.75	268.746	601.253	1020.28	1732.26	346.882	1374.46	1072.93	665.088	1206.19	126588	1350.62	566.486	600.736	1392.36	3943.03	1705.28	216163	1803.67
842	M81T19	81.1	81.1	81.1	18.7263	18.4185	19.2321	21	0	0	0	3	0	0	1	0	0	0	0	0	0	0	3	0	3	4	1		0.000376497	1.65597e-05	3146.55	912.005	1346.5	22016.9	3087.64	846.829	11666	2229.57	2119.68	1451.91	6035.93	1295.71	704.72	2722.5	23620.8	2794.43	34497	96128.3	44258.7
843	M124T10	124.1	124.1	124.1	10.4101	10.1007	10.6623	10	0	0	0	0	0	1	1	0	0	0	0	1	0	0	0	1	1	0	4		0.000376836	1.6571e-05	1650.88	764.556	851.957	1047.71	1896.14	642.599	2266.4	1900.39	455.495	2005.83	3715.11	865.489	1084.01	544.874	1101.02	2486.21	2318.06	596.579	16342.1
844	M51T21	51	51	51	20.7843	20.6118	20.8076	4	0	0	0	1	0	0	0	0	0	0	0	0	0	0	0	0	0	3	0		0.000379644	1.6664e-05	2205.7	2642.24	1992.38	4561.62	2557.58	2493.17	2634.54	2982.02	3073.12	2245.15	3637.53	1836.29	1919.52	1975.68	3118.37	2288.86	2913.57	15355.3	1850.22
845	M255T29	255.2	255.2	255.2	28.9355	28.8706	29.2366	8	0	0	0	0	1	0	0	1	0	0	0	1	0	1	0	1	3	0	0		0.000381503	1.67253e-05	1675.39	606.403	2532.47	2270.22	3440.33	906.649	715.246	2787.25	606.77	3285.82	2761.05	1975.3	437.667	3697.88	1547.8	1937.67	4052.14	694.151	310.391
846	M161T13	161.15	161.1	161.2	13.0937	12.7469	13.1158	8	0	0	0	4	0	1	0	0	0	0	0	1	1	0	0	0	0	0	0		0.000382579	1.67608e-05	1225.01	188.938	13315.9	2.59782e+06	39012.8	1270.37	613.406	24825	19188.6	189.626	10810.8	21755.4	2932.5	211.944	8700.09	3152.89	48320.5	1070.39	1963.29
847	M65T12	65.1	65	65.1	11.7229	11.5647	12.0191	10	0	0	0	0	0	0	0	0	0	1	0	1	0	0	0	0	0	0	5		0.000391779	1.70619e-05	505.237	230.547	321.407	11763.8	246.425	186.005	382.673	433.309	550.066	1486.05	398.324	864.838	391.151	195.241	1119.2	626.934	3832.9	654.933	5.94845e+06
848	M50T19	50	50	50	18.7642	18.7307	18.9381	4	0	0	0	0	0	0	0	0	0	0	0	0	0	2	1	0	0	1	0		0.00039238	1.70815e-05	826.126	777.865	582.344	900.51	796.888	528.402	984.152	845.468	779.853	521.914	1349.75	537.296	469.07	2361.08	2487.95	1124.1	865.721	18907.9	755.39
849	M128T19	128.1	128.1	128.1	18.9306	18.9231	18.9381	2	0	0	0	0	0	0	0	0	0	0	0	0	0	0	2	0	0	0	0		0.000394265	1.71426e-05	883.807	727.258	1544.64	972.754	983.263	532.665	713.63	723.439	1186.92	601.575	912.258	1621.24	571.79	1034.74	49907.3	572.112	3676.44	1696.71	728.37
850	M166T17	166.1	166.1	166.1	17.4957	17.4898	17.4988	4	0	0	0	0	0	0	0	0	0	0	0	0	0	0	0	0	0	4	0		0.000395353	1.71779e-05	70.6079	119.856	53.6645	256.27	217.509	34.1159	88.9252	54.4857	133.867	116.272	290.325	116.755	20.3562	31.6328	166.543	152.128	322.283	8798.82	178.518
851	M30T30_2	30	30	30	30.3004	30.0983	30.4414	38	3	1	2	1	1	2	0	0	2	1	1	3	1	1	1	1	5	0	0		0.000395746	1.71906e-05	86377.4	148279	137287	139728	131628	129891	134491	135715	162038	154098	142253	112322	93252.6	110108	133373	141838	131068	104563	74434.1
852	M96T12_1	96.1	96	96.1	11.8239	11.5858	12.0062	40	4	1	3	2	3	1	3	2	2	2	4	2	0	0	0	3	2	0	5		0.000397913	1.72607e-05	19470.8	4827.47	4434.62	8625.3	14216	4613.98	13617.7	13588.5	3247.03	14267.6	19592.8	4745.29	4759.33	1651.61	14798.8	17546.2	14555.5	3273.78	2.00544e+06
853	M83T16	83.1	83.1	83.1	16.2759	15.4626	16.3836	56	4	0	2	3	3	1	1	0	1	2	4	1	0	0	1	3	4	4	2		0.000399935	1.73259e-05	24085.4	3035.55	5470.53	12298.8	27346.7	3769.75	14882.8	5520.46	5516.65	16077.1	25798.7	8569.88	4357.35	3578.7	6060.46	35935.7	20018.9	357612	21751.5
854	M91T11	91.1	91	91.1	11.4464	10.9305	11.9179	26	0	0	0	4	1	0	0	1	1	0	0	0	1	0	0	1	4	3	4		0.000405808	1.75142e-05	1015.13	620.48	623.726	51024	2266.77	737.327	728.7	6281.73	3401.36	423.771	1273.39	427.799	26081	497.416	1510.19	2422.81	60297.2	59750.1	24331.7
855	M137T19	137.1	137.1	137.1	18.7168	18.4262	19.2283	6	0	0	0	2	0	0	1	0	0	0	0	0	0	0	0	0	1	2	0		0.000407331	1.75629e-05	452.413	229.81	358.478	3887.57	779.322	213.995	1179.42	243.774	406.721	343.004	952.277	370.337	230.724	257.394	1675.27	690.509	3130.86	6384.18	339.895
856	M141T10	141.1	141.1	141.2	9.98748	9.93292	10.5494	11	0	0	0	0	0	0	0	0	0	0	1	0	0	0	0	0	5	0	4		0.000407512	1.75686e-05	528.818	503.443	347.703	875.338	394.272	374.071	643.745	432.077	555.326	435.011	1265.89	236.343	841.106	304.916	679.693	510.702	22728	347.628	21557.1
857	M106T9	106.1	106.1	106.1	9.14762	8.70833	9.52897	43	0	1	0	4	2	2	1	0	2	0	5	1	1	0	3	2	4	2	4		0.000407925	1.75818e-05	3005.97	12770.9	3461.72	23979.4	18454.3	9956.52	11914	6186.61	17557.3	2846.22	21533.3	8152.7	5971.04	2078.73	15134.4	38879.7	44892.1	5458.08	13019.4
858	M133T16_2	133.1	133.1	133.1	15.7017	15.3087	15.8401	74	4	3	4	4	3	4	4	3	4	3	5	4	3	4	3	3	5	4	5		0.000408535	1.76012e-05	197806	311860	124100	294269	311686	275010	344409	305224	249716	45678.4	348892	160615	104626	184235	356306	341586	223463	199630	340721
859	M221T21	221.1	221.1	221.1	21.3555	21.3307	21.8382	18	0	1	0	3	2	3	2	2	1	0	0	0	0	0	2	0	1	0	1		0.000408892	1.76126e-05	2732.69	8748.35	2852.04	10806.5	6284.37	5807.34	6395	5432.95	7644.99	2506.35	7844.6	3046.47	2442.95	3302.96	13070.2	2674.54	3778.93	2299.84	2089.79
860	M84T8_2	84	84	84.1	7.61045	7.0695	7.806	13	0	0	0	0	0	0	0	0	0	0	0	0	1	0	1	0	1	3	2		0.000411066	1.76817e-05	56888	72554.7	48642.3	68215	57187.8	62939.3	63325.5	66701	70191.3	50574.9	70866.4	48665	97204.5	57895.5	115801	69977.7	59026.8	219373	149898
861	M66T11	66.1	66.1	66.1	11.0665	10.9208	11.3017	7	0	0	0	0	0	0	0	0	0	0	0	0	0	0	0	0	1	0	5		0.00041141	1.76926e-05	434.274	238.075	198.167	749.992	223.754	221.09	366.267	645.075	271.604	359.143	762.34	130.409	293.037	200.694	374.68	357.366	2998.1	995.694	1.37272e+06
862	M41T16	41	41	41.1	15.9991	15.8299	17.0121	17	1	0	0	0	0	0	0	0	0	0	1	2	0	1	0	0	3	4	0		0.000413173	1.77485e-05	58143.1	16393.6	20741.7	25886.7	31401.4	14823.5	27664.7	29003.4	16813.8	26319.5	44979	27483.9	14186.1	17712.8	19857.5	31888.1	47681.8	1.24719e+07	38876.6
863	M30T14	30	30	30	14.44	14.4321	14.4404	4	0	0	0	0	0	0	1	0	0	0	0	0	0	0	0	2	1	0	0		0.000413686	1.77647e-05	7901.62	7202.93	5907.93	8641.65	7169.52	6714.62	7535.58	7775.72	7436.13	7002.31	7839.45	7074.37	4447.34	6206.71	7084.41	13377	7600.8	5119.4	4056.41
864	M55T17	55	55	55.1	17.387	17.3813	17.4096	10	1	0	0	4	0	0	0	0	0	1	1	1	0	0	0	1	1	0	0		0.00041977	1.79564e-05	13541.9	7749.11	7895.8	103842	12219.1	6850.28	10560.2	10707.8	7674.65	10926.4	19316.1	11906.5	6381.66	9477.82	12792	24052.6	18715.1	9730.95	14644.7
865	M68T16	68.1	68.1	68.1	15.9512	15.4626	16.407	25	2	0	0	0	2	0	1	0	0	0	3	2	0	0	0	1	0	4	2		0.000421419	1.80082e-05	17344.8	1044.61	1336.6	2447.96	6548.13	1187.33	6581.36	3394.12	1033.88	2857.48	136124	6182.96	918.305	631.844	1583.94	18614.4	8897.56	6.03404e+06	8919.98
866	M45T13	45	45	45	12.5805	12.2563	12.6283	4	0	0	0	0	0	0	0	0	0	0	0	0	0	0	0	0	0	0	3		0.000423011	1.80579e-05	68320.3	75130.8	66764.9	74674	69225.2	71760.8	74366.7	74602.4	72722.4	69128.2	74876.1	65540.7	60385.9	71478.5	71499.8	69236.3	68323.8	65280.1	205511
867	M140T8	140.1	140.1	140.2	7.61882	7.61045	7.6222	5	0	0	0	0	0	0	0	0	0	0	0	0	1	0	0	0	1	3	0		0.000423685	1.8079e-05	291.531	88.0196	75.7282	169.294	152.809	276.26	831.685	82.177	133.29	82.5085	387.933	153.056	1716.87	185.531	710.61	644.909	2635.79	15177	84.8796
868	M41T21	41	41	41.1	21.0102	20.766	21.0329	8	1	0	0	0	0	0	0	0	0	0	1	1	0	1	0	0	1	2	0		0.000424109	1.80922e-05	25095.2	28995.4	20801.3	32539.1	25275.4	22087.3	28186.9	30224.9	24447.4	19710.7	30869.5	23522.8	17083.2	35333.5	24338.9	24665.8	57054.7	464471	14148.5
869	M67T13	67.1	67	67.1	12.7887	12.2407	13.5063	46	1	0	2	4	2	0	1	1	1	0	5	2	1	0	0	2	2	2	5		0.000426766	1.81751e-05	17410	11558.3	22596.7	788621	56753.2	11915.2	15488.2	31790.1	24390	11608.3	50959.7	29094.1	12281.6	11451.5	18553.5	17885.5	101236	38722.7	1.90955e+06
870	M57T13	57.1	57.1	57.1	12.77	12.3433	13.6308	109	4	3	4	4	3	4	4	3	4	3	5	4	3	4	3	3	5	4	5		0.000427079	1.81848e-05	273062	304731	321939	340751	321035	305969	293756	293784	265952	270177	348809	260076	238101	262470	415119	349336	261077	258682	368169
871	M78T7_1	78.1	78	78.1	7.46562	7.43133	7.82627	16	1	0	1	0	0	0	0	0	0	0	0	0	0	1	0	0	4	0	4		0.00042932	1.82544e-05	1154.93	492.8	1421.28	1249.25	910.857	780.572	12689	657.753	588.476	530.68	1470.88	1040.46	1936.65	944.536	1519.88	903.158	279827	2796.02	53934.3
872	M86T20	86	86	86	20.4445	20.4407	20.4484	6	1	0	0	0	0	0	1	0	0	0	0	2	0	0	0	1	1	0	0		0.000429618	1.82637e-05	28135.8	28722.1	23847.5	28442.1	24520.2	26656.5	29289.9	26077.5	27110.1	25095.4	28980.2	25981.8	19034.8	25264.8	27399.4	33877.1	26422.8	23458.8	20425.2
873	M148T19	148.1	148.1	148.1	18.9238	18.358	19.2283	8	0	0	0	1	1	0	0	0	0	0	0	0	0	0	3	0	2	0	0		0.000433786	1.83925e-05	474.987	605.918	406.587	4485.91	1952.2	482.214	439.888	450.154	793.112	327.223	675.189	447.84	271.278	467.134	15877.8	459.494	4499.16	524.952	771.519
874	M130T14	130.1	130.1	130.1	14.4319	13.8934	14.9628	12	0	0	0	2	0	0	0	0	0	0	0	0	0	0	1	0	4	2	1		0.000437507	1.8507e-05	129.246	149.514	140.257	5152.33	80.9903	145.001	152.634	798.923	1005.83	113.095	272.091	385.406	59.2814	90.139	7564.93	123.125	10055.7	3136.47	1797.97
875	M123T9	123.1	123.1	123.1	9.15888	8.7434	9.16283	11	0	0	0	2	0	0	0	0	2	0	3	0	0	0	0	2	2	0	0		0.000439024	1.85535e-05	190.136	245.877	256.811	5136.06	2465.67	317.81	564.039	519.265	4752.69	1091.25	5052.92	1910.71	1905.9	140.633	1879.3	11027.9	4853.07	265.421	975.252
876	M58T12	58.1	58.1	58.1	11.6959	11.5858	12.0191	9	0	0	0	0	0	0	0	0	1	0	0	0	0	0	0	1	0	0	5		0.000440034	1.85845e-05	15652.9	9374.31	8055.82	13243.4	10210.9	6419.47	9160.49	7505.39	12679.2	6587.47	14743.1	5088.76	7273.63	7355.74	8987.59	17991	8566.02	15017.2	312157
877	M82T17	82.1	82.1	82.1	17.4057	16.9047	17.5339	8	0	0	0	4	0	0	0	0	0	0	0	0	0	0	0	0	1	1	1		0.000442855	1.86706e-05	913.281	768.522	1148.37	75985	2493.13	367.049	1087.26	1224.81	947.564	866.288	2272.09	942.759	683.917	719.176	1246.17	1335.13	6426.93	8211.31	3945.12
878	M57T14_1	57.1	57.1	57.1	14.3535	14.161	14.4281	14	0	0	0	2	0	0	1	0	0	0	2	1	0	0	1	0	3	1	3		0.000445525	1.87519e-05	33391.5	16308.1	14733.3	48796.2	38488.2	16387.7	29437.3	29589.7	25998.3	14102.3	62775.5	22657.4	12797.6	14975.9	35441.2	38247.2	58064.4	18095.4	32421.6
879	M97T15	97.1	97.1	97.1	14.796	14.4205	15.2503	18	0	0	0	3	0	0	1	0	0	2	1	0	1	0	0	0	3	4	0		0.000447679	1.88173e-05	8692.2	2032.51	4143.4	17033	9638.85	1926.6	9503.11	5985.89	4183.2	6942.76	22844	5070.43	3666.02	2617.47	6687.9	10121	18227.6	19639.3	14576.2
880	M131T14_2	131.1	131.1	131.1	13.8992	13.8273	14.116	10	0	0	0	4	0	0	0	0	0	0	0	0	0	0	1	0	2	0	1		0.000447978	1.88264e-05	1146.39	1309.54	842.816	34905.3	1403.29	1264.99	1414.61	1253.94	1440.23	1260.05	1894.04	1467.3	1274.35	973.432	32471.7	1926.12	7860.64	1273.41	4316.5
881	M115T7	115.1	115.1	115.1	7.4509	7.39173	7.60702	13	0	0	0	0	0	0	0	0	0	0	0	0	0	0	0	0	5	0	5		0.000449139	1.88615e-05	1404.29	2086.75	1201.51	1855.78	1172.58	1597.74	4532.78	1427.33	1608.03	1433.81	1992.79	1193.91	1831.46	1423.86	2286.78	1700.61	80381.8	1837.07	145933
882	M63T13	63	63	63.1	12.6795	12.6642	12.8077	5	0	0	0	1	0	0	0	0	0	0	0	0	0	0	0	0	1	0	3		0.000449581	1.88749e-05	557.983	376.801	546.819	966.421	396.327	654.912	563.099	803.789	242.672	1165.53	636.546	434.955	1142.59	603.185	692.264	421.034	4944.79	665.704	25753.1
883	M96T21	96.1	96.1	96.1	21.0129	20.2808	21.5502	18	1	2	0	1	1	0	1	1	0	0	0	1	0	1	0	0	2	4	0		0.000449848	1.88829e-05	4126.04	6330.34	2225.17	9878.43	4294.67	2468.55	8308.97	7738.59	3555.35	1770.18	6384.02	4373	881.16	10025.1	3240.64	4089.06	16776.7	38450.8	2761.04
884	M165T15	165.1	165.1	165.1	15.1739	15.1644	15.2106	3	0	0	0	0	0	0	0	0	0	0	0	0	0	0	0	0	0	0	3		0.000450229	1.88944e-05	251.915	88.9202	122.347	215.212	321.72	90.8879	205.508	134.76	164.155	117.356	461.314	191.701	185.423	62.7204	293.509	350.816	241.599	103.339	5947.72
885	M82T12	82.1	82.1	82.1	11.8254	11.4803	12.4613	66	4	1	2	3	3	1	4	3	1	3	5	2	0	0	0	3	4	3	4		0.000451572	1.8935e-05	36999.6	8991.27	8594.77	20522.9	28635.4	5809.37	29218.5	24206.8	7594.1	29512.9	36988	9978.89	6127.99	3128.75	15802.4	36660.4	34106.8	16554.6	232193
886	M54T14	54.1	54.1	54.1	13.8943	13.8864	13.9032	4	0	0	0	4	0	0	0	0	0	0	0	0	0	0	0	0	0	0	0		0.000452827	1.89728e-05	436.851	500.274	373.455	54069.7	399.576	297.167	406.363	449.977	332.093	504.236	1034.34	319.262	508.531	262.761	1828.63	502.142	3245.61	1249.41	623.896
887	M70T16	70.1	70	70.1	15.9875	15.4626	16.6173	30	2	0	1	0	1	0	1	0	0	0	3	1	1	0	0	1	4	4	2		0.000453926	1.90059e-05	12957.2	2251.8	4364.22	4431.58	7631.73	2198.26	7202.74	4656.44	3815.36	4046.92	36146.7	4290.25	4239.98	1623.75	3538.73	12430.3	9129.76	2.5316e+06	8474.51
888	M65T14_2	65	65	65.1	14.4301	14.4281	14.7096	8	0	0	0	1	2	0	1	0	1	0	1	0	0	2	0	0	0	0	0		0.000456406	1.90804e-05	8008.04	3459.03	2839.05	60007.9	5637.7	1316.51	5487.85	11282.3	10260.2	5690.35	9318.54	12958.9	1325.32	4464.12	4818.53	25735.5	49409.7	10218.5	6931.64
889	M114T15	114.1	114.1	114.1	15.0909	14.9238	15.5417	18	0	0	0	2	2	0	1	0	0	0	3	1	0	1	2	3	2	0	0		0.000457565	1.91151e-05	2468.53	1262.95	1194.92	6516.34	22298	801.35	3902.6	1394.17	1313.52	1387.27	30048.3	2261.3	656.208	11852.3	7022.96	63503.5	2720.13	841.958	2816.89
890	M43T16	43	43	43.1	15.9853	15.246	16.3871	117	4	3	4	4	3	4	4	3	4	2	5	4	1	2	3	3	5	4	5		0.000458779	1.91514e-05	234941	65244	65288.5	87264.4	129149	68518.3	155554	117053	67135.6	85915.3	172737	90909.5	43068.2	47470.1	94025.8	142955	222366	1.12761e+06	172891
891	M98T9	98.1	98.1	98.1	9.27715	8.88218	9.29498	13	0	0	0	0	0	1	1	0	0	0	0	0	2	0	0	0	4	0	4		0.000460797	1.92117e-05	1307.2	539.764	429.189	694.495	536.671	3098.58	2439.48	1034.32	737.002	350.615	1004.88	511.885	19722.5	555.717	1614.23	1099.03	11562.6	466.541	59549
892	M63T15	63	63	63	15.0718	14.8168	15.2364	14	0	0	1	1	1	0	0	1	0	0	2	0	0	0	0	1	3	2	1		0.000462398	1.92593e-05	2337.83	214.688	1293.71	2750.26	1949.64	487.373	604.323	5387.18	864.9	274.226	3096.04	2256.17	230.552	228.105	1204.91	8202.41	3480.66	137453	5598.74
893	M98T13	98.1	98.1	98.1	12.7699	12.3433	13.4345	51	3	0	3	4	3	3	4	1	0	2	4	2	2	1	2	2	5	1	2		0.000462649	1.92668e-05	5673.96	4864.58	5526.63	7007.65	5035.63	5099.97	5972.85	5405.79	4578.62	4464.49	16387.3	4484.68	5466.75	4187.02	7165.32	5393.24	9479.22	4091.43	147415
894	M99T16_1	99.1	99.1	99.1	15.5036	15.4626	15.8299	8	0	0	0	1	0	0	1	0	0	0	2	0	0	0	0	0	0	4	0		0.000463133	1.92812e-05	3330.5	2539.33	2308.12	4746.02	4888.05	1995.02	4381.64	3193.86	2835.5	1190.24	58441.6	2371.87	1251.61	2275.49	4115.42	4194.36	2715.36	22412.5	2356.05
895	M79T7_2	79.1	79	79.1	6.93618	6.6315	7.10407	19	1	0	1	1	0	1	1	0	0	0	0	1	1	1	0	0	5	3	1		0.000463478	1.92915e-05	4193.15	707.007	4040.8	8941.77	2187.62	5850.89	19781.6	2543.86	2399.36	1959.08	3480.97	1427.21	20484.2	2409.55	8975.3	10761	847976	309131	27397.2
896	M164T19	164.1	164.1	164.1	19.011	19.0034	19.0193	16	0	0	0	1	0	1	1	3	0	0	3	2	1	0	1	0	3	0	0		0.000465592	1.93578e-05	651.549	326.33	524.166	3985.98	621.079	3137.9	2068.51	26090.3	489.575	402.261	6372.84	4024.35	7573.28	278.145	14121.8	700.77	34177.2	2323.03	432.598
897	M134T10	134.1	134.1	134.1	9.99485	9.87292	10.3759	14	0	0	0	1	0	1	0	0	0	0	0	0	1	0	1	0	4	2	0		0.000468294	1.94477e-05	752.886	1442.02	854.982	2740.94	1526	2400.89	2822.45	1247.59	1055.76	489.276	1737.56	782.728	5955.89	1454.56	3774.18	2031.94	14374	7248.6	1527.7
898	M68T12	68.1	68.1	68.1	11.824	11.4101	12.0191	29	2	0	0	2	2	0	2	3	2	2	3	0	0	0	0	2	1	0	5		0.000474401	1.96502e-05	28791.2	5886.59	5416.03	13253.9	21797.6	6855.72	20977.9	29786.2	10912.7	22076.1	27300.1	5045.83	5006.61	1973.53	6786.39	27269.2	18830.6	7364.34	3.45575e+06
899	M103T13	103.1	103.1	103.1	13.091	12.8154	13.2961	9	0	0	0	4	1	0	0	0	0	0	0	0	0	0	0	0	3	1	0		0.000477615	1.97563e-05	6450.64	6303.87	6754.44	195694	13127.1	7143.5	6614.01	8918.69	9376.67	5245.1	9803.26	8121.61	6903.89	5940.37	8942.15	7039.96	31253.2	8599.01	9453.15
900	M108T12	108.1	108.1	108.1	11.6858	11.3179	11.8682	15	1	0	1	3	0	0	0	0	0	1	0	0	0	0	1	0	5	0	1		0.000485017	1.99996e-05	1774.42	264.809	3035.59	40162.3	973.663	242.704	3331.16	626.872	1345.52	1923.11	698.876	1108.3	857.854	338.701	4365.77	898.365	200975	591.202	8418.1
901	M45T12	45.1	45.1	45.1	11.7072	11.5858	11.7513	4	0	0	0	0	0	0	0	0	0	0	0	0	0	0	0	0	0	0	4		0.000487975	2.00964e-05	13103.2	21779.1	9800.87	14359.4	13849.4	12436.2	11776	20455.3	15014	8032.64	15181.6	9857.48	7778.15	8627.73	16208.9	10565.3	4674.75	6324.82	454634
902	M113T16	113.1	113.1	113.1	15.541	15.4626	15.9985	9	0	0	0	1	0	0	0	0	0	0	2	0	0	0	0	0	0	4	0		0.000488331	2.01081e-05	1568.41	999.317	788.891	2497.72	1835.13	924.261	1579.95	1529.19	1327.69	710.333	20853.5	1167.35	584.849	1120.93	1813.52	3000.22	1736.93	13083	1080.66
903	M69T17	69.1	69.1	69.1	16.8381	16.8304	17.0121	5	0	0	0	0	0	0	0	0	0	0	0	2	0	2	0	0	0	1	0		0.000489125	2.0134e-05	5371.04	2768.6	2487.27	28327.4	8126.53	2141.63	4940.29	6343.24	4092.8	3132.4	19926.9	34072.9	1814.48	10683.5	5903.32	6384.14	4855.67	58121.9	4855.7
904	M61T7_2	61	61	61	7.4266	7.38897	7.5996	7	0	0	0	0	0	0	0	0	0	0	0	0	0	1	0	0	2	0	4		0.00049269	2.02503e-05	622.594	915.59	746.432	847.071	868.878	986.627	873.24	720.056	1093.54	841.336	764.47	594.639	813.212	1304.57	1043.12	647.64	2521.35	621.457	119762
905	M63T14_1	63	63	63	14.4358	14.025	14.7026	19	3	1	0	2	0	0	2	1	1	1	0	0	0	0	0	3	3	1	0		0.000496062	2.03599e-05	4999.57	2235.58	954.197	7849.28	1531.11	522.468	4536.28	3292.04	2431.74	2384.53	2054.71	5069.9	400.767	1398.24	985.125	15149.2	16100.1	5493.89	1444.17
906	M62T24	62	62	62	24.3136	24.3084	24.3145	3	0	0	0	0	0	0	0	0	0	0	0	0	0	0	0	0	0	3	0		0.000497763	2.0415e-05	1147.59	1636.75	1177.87	1292.59	1328.34	1337.95	1324.65	1324.39	1336.03	1167.29	1668.12	1118.77	703.399	1243.66	1188.45	1310.13	1156.02	23947.8	647.27
907	M69T21	69.1	69.1	69.1	21.0214	20.6196	21.105	48	3	2	1	3	2	1	3	3	1	0	5	3	0	3	1	3	5	4	3		0.000501679	2.05418e-05	22580.4	28346.3	11135.4	44928.6	23540	14338.5	40747.9	40890.2	16262.4	11414.8	33720.5	24998.3	5914.28	52237.3	15388.6	23267.7	71755.6	2.31562e+06	18432.1
908	M52T13	52.05	52	52.1	13.1011	13.0867	13.4216	8	0	0	0	3	2	0	0	0	0	0	0	1	0	0	0	0	1	1	0		0.00050431	2.06267e-05	559.328	232.8	1041.79	113668	5186.52	286.558	288.079	2295.21	2136.03	280.895	1988.5	2568.66	715.314	138.16	1422.67	464.151	2971.01	14559.6	3920.23
909	M70T13	70.1	70.1	70.1	12.7696	12.3433	13.1928	117	4	3	4	4	3	4	4	3	4	3	5	4	3	4	3	3	5	4	5		0.000507676	2.07351e-05	46216.8	49233.6	51581.6	58737.4	54368.5	49839.8	50422.2	41817.9	42416.6	43905.7	60619.3	42475.6	40678.4	41911.8	67070.1	58431.3	53502.7	42904.5	70388.3
910	M117T6	117.1	117.1	117.1	5.96585	5.92195	6.24268	14	0	0	1	0	0	0	0	0	0	0	0	0	0	0	0	0	5	0	3		0.000512002	2.08739e-05	20021.9	21128.6	21883.6	20934.7	21106.7	19885.7	20221.6	19952.6	18977.1	17276.5	20373.1	18685.5	15916.8	17827.6	20905.1	23261.4	99181.7	16527.6	51489.1
911	M186T29	186.1	186.1	186.1	28.9087	28.8477	29.0422	35	3	0	2	1	2	1	2	0	1	2	4	3	2	2	0	3	4	3	0		0.00051215	2.08786e-05	21769	4954.11	30872.2	18151.5	39628	10691.2	12088	27479.3	7248	45698	40626.8	21691.4	9480.26	45846.1	11016.1	26299.3	23839.4	13081	3980.94
912	M67T16_2	67.1	67.1	67.1	15.5036	15.4626	15.541	6	0	0	0	0	0	0	0	0	0	0	3	0	0	0	0	0	0	3	0		0.000513162	2.0911e-05	1459.48	660.934	900.527	3392.79	1483.68	544.09	1202.07	2409.52	1381.79	4695.39	129097	3590.47	826.132	1880.26	1465.2	1514.76	5512.3	615039	13392
913	M118T13	118.1	118.1	118.2	12.9546	12.8115	13.099	8	0	0	0	2	1	0	0	0	1	0	0	0	0	0	0	0	4	0	0		0.000513523	2.09226e-05	265.783	200.14	229.484	44760.8	2457.86	236.313	278.675	322.816	1170.45	219.476	353.944	251.482	249.054	173.176	371.927	268.877	20698	301.509	505.026
914	M30T31	30	30	30	30.8341	30.4643	31.1774	79	2	1	1	2	2	3	2	1	2	3	2	3	1	2	2	2	4	2	0		0.000515249	2.09778e-05	56256.8	196162	132082	123540	118359	140204	121094	118133	141467	58594	132285	76258.6	105900	98694.5	121205	164179	112136	84234.2	68687.6
915	M116T13	116.1	116.1	116.1	13.0902	12.8192	13.1158	8	0	0	0	4	0	0	0	0	0	0	1	0	0	0	0	0	2	0	1		0.000519012	2.10978e-05	548.822	550.992	736.479	75331.9	1708.35	424.486	552.863	1316.89	1290.4	415.367	1454.58	1135.92	474.445	451.563	1151.7	590.006	18623	471.572	1606.87
916	M103T14	103.1	103.1	103.1	13.9229	13.8864	13.9812	8	0	0	0	4	0	0	0	0	0	0	2	0	0	0	1	0	0	0	0		0.000520631	2.11493e-05	7166.9	7959.35	7086.05	60907.2	12066	7718.5	8768.27	9458.63	8736.52	7523.6	41995.9	7543.99	5692.88	6861.58	23285.3	10647.5	12147.1	7435.95	10441.1
917	M123T26	123.1	123.1	123.1	25.6265	25.321	25.8733	5	0	0	0	0	0	0	0	0	0	0	0	0	0	0	0	0	3	0	0		0.000526504	2.13356e-05	3983.07	5679.07	3229.46	5087.93	2981.32	3333.54	3217.64	3092.59	3602.68	3125.68	5320.36	3366.29	2690.97	3653.78	5092.16	3915.68	47353.9	3423.55	3037.09
918	M118T18	118.1	118.1	118.1	17.8321	17.8231	17.8359	5	0	0	0	0	0	0	0	0	0	0	1	0	0	0	2	0	0	2	0		0.000527616	2.13708e-05	461.273	503.926	447.347	658.263	731.936	541.153	589.834	499.011	552.921	496.452	16279.7	300.649	362.538	521.388	14547.7	621.671	578.703	15887.1	853.704
919	M160T14_2	160.2	160.2	160.2	13.8951	13.8934	13.9812	3	0	0	0	2	0	0	0	0	0	0	0	0	0	0	1	0	0	0	0		0.000528097	2.1386e-05	17.8754	26.8725	46.7774	38993.2	72.5341	17.3704	33.221	71.3919	65.431	21.4782	63.4549	104.281	54.7818	7.11271	16871.5	138.761	1163.77	55.1589	95.32
920	M92T15	92	92	92.1	15.0749	14.8171	15.2437	23	1	0	1	2	0	1	1	1	1	0	4	0	0	0	1	3	2	2	1		0.0005298	2.14398e-05	13920.6	263.822	7789.49	41321.2	9968.22	2733.16	3666.19	32916.2	5672.3	1427.27	24049.1	13164.7	695.131	610.704	34571.5	54150.1	24174.1	945182	30911.6
921	M147T12_2	147.1	147.1	147.1	11.6168	11.3298	11.7664	10	0	0	0	3	0	0	0	0	0	0	0	0	0	0	1	0	4	0	0		0.000530959	2.14763e-05	1829.04	1252.28	1110.68	22582.6	1074.45	1243.2	1224.63	1502.46	2095.18	1049.57	1099.18	1098.22	1175.58	988.881	3848.85	1929.79	10912.1	1015.51	1714.99
922	M43T7	43	43	43.1	7.31063	6.92448	7.84877	42	3	0	0	0	0	2	0	0	2	1	0	1	3	1	1	2	5	4	2		0.000538645	2.1727e-05	81761	46250	46280.7	46155.2	46504.8	152191	58430.5	52952.1	59271.4	61705.1	71315.1	42184.4	99047.1	44916	70644.3	81935.7	281696	187328	277964
923	M97T12	97.1	97	97.1	11.824	11.5622	12.0376	21	2	0	0	3	1	0	0	0	0	2	0	2	0	0	0	1	2	0	5		0.000543717	2.18917e-05	8654.15	2141.68	2013.79	6661	5534.02	1793.01	6713.51	5693.38	2388.74	5017.35	10475.7	5000.1	3829.04	1142.59	6746.84	10392.1	16047.5	2485.37	3.54494e+07
924	M59T28_2	59.1	59.1	59.1	27.9975	27.8564	28.1881	45	0	2	2	1	1	2	3	3	3	0	5	0	1	1	3	2	0	3	2		0.000549524	2.20795e-05	1.12864e+06	1.19541e+06	1.11313e+06	1.38601e+06	1.14173e+06	1.44785e+06	1.49854e+06	1.60871e+06	1.55716e+06	1.12025e+06	1.39315e+06	991047	923587	1.25611e+06	1.06448e+06	1.13371e+06	1.04131e+06	960656	971685
925	M189T18	189.2	189.1	189.2	18.1379	18.017	18.3439	5	0	0	0	2	1	0	0	0	0	0	0	0	0	0	0	1	1	0	0		0.000551208	2.21338e-05	163.792	83.9975	106.087	11903.5	3874.21	51.9338	139.722	115.957	243.408	238.357	491.285	185.674	53.1641	150.346	209.178	699.015	4757.23	138.59	150.252
926	M83T17	83.1	83.1	83.1	17.262	16.9083	17.5339	12	0	0	1	4	0	0	1	0	0	0	0	0	0	0	0	2	1	1	1		0.000555461	2.22707e-05	3847.98	2434.11	3746.47	80698.8	6541.26	1709.93	7944.99	3212.67	2330.1	2146.72	6523.8	3291.17	1774.21	2686.16	3994.43	11922.2	8556.44	5928.62	12181.1
927	M66T24	66.1	66	66.1	24.3109	24.3107	24.3136	3	0	0	0	0	0	0	0	0	0	0	0	0	0	0	0	0	0	3	0		0.000556415	2.23014e-05	347.905	570.48	312.151	602.988	230.897	442.319	333.243	241.567	511.803	402.923	552.366	273.66	244.558	338.685	492.584	375.176	943.916	41287.7	312.527
928	M205T17_2	205.2	205.2	205.2	17.4058	17.3886	17.4062	3	0	0	0	2	0	0	0	0	0	0	0	0	0	0	0	0	1	0	0		0.00055642	2.23015e-05	116.359	24.2979	70.8829	11498.1	188.911	45.7779	135.221	79.7888	78.2839	97.6199	325.903	88.7405	69.4892	44.6738	174.632	81.1128	1691.37	41.8324	94.5722
929	M105T23	105.1	105	105.1	23.3024	22.5614	24.0247	22	0	0	0	1	1	0	1	0	0	0	2	0	0	0	0	2	1	2	2		0.000558568	2.23705e-05	11320.5	8377.48	8075.72	16810.8	13670.9	12987.9	14930.1	13933.5	11971.6	5338.08	18650.6	7328.1	5923.41	10382.7	18025.3	22070.8	65152.7	1.78335e+06	10004.2
930	M121T21	121.1	121	121.1	20.7622	20.2808	21.3486	23	2	0	0	4	0	0	0	0	0	0	1	1	0	0	0	0	3	4	0		0.00056846	2.26865e-05	5397.1	2323.72	1608.27	14041.9	2027.65	1778.19	2205.14	2550.99	2291.19	1914.9	6579.36	3384.34	1789.59	1757.88	2871.02	2190.09	46276.2	252909	1703.78
931	M267T12	267	266.9	267	12.138	12.1049	12.3479	53	4	1	4	0	3	1	3	3	3	3	4	3	3	3	2	3	5	3	2		0.000570278	2.27444e-05	19814.6	7141.13	12508.9	6617.06	16446.5	5399.39	9377.21	9803.56	8431.84	15016.5	12943.8	11885.1	13389.2	11860.3	6472.44	18494.1	17250.5	18205.3	30292.7
932	M60T11	60	60	60	11.081	11.0801	11.3017	3	0	0	0	0	0	0	0	0	0	0	0	0	0	2	0	0	1	0	0		0.000573171	2.28363e-05	4159.62	3587.04	2866.51	3756.8	3134.2	3421.61	3059.68	4625.4	3244.21	4172.87	4515.68	2250.65	2637.37	7003.62	4704.21	3057.15	3867.97	3048.99	6795.3
933	M147T17_2	147.1	147.1	147.1	17.4062	17.2383	17.7452	9	0	0	0	2	0	0	1	0	0	0	0	0	0	0	2	0	2	0	1		0.000574177	2.28682e-05	1941.41	1927.61	1645.13	31755.8	3342.16	1873.7	3660.02	2343.44	2071.69	1876.76	2597.24	1903.18	1787.91	1366.7	18040.8	2129.58	5305.85	1728.7	3076.21
934	M96T11	96	96	96.1	11.2259	11.0479	11.3261	39	2	1	3	1	2	2	3	0	1	2	2	3	2	3	0	0	4	3	5		0.000575213	2.29011e-05	6033.61	8610.28	8138.65	5907.94	7831.15	5717.65	10509.5	5043.41	5005.67	7558.53	14924.4	8776.07	7122.34	7824.07	5470.37	7402.51	14667.6	10443.2	552626
935	M88T7	88.1	88.1	88.1	7.3927	7.38517	7.41178	4	0	0	0	0	0	0	0	0	0	0	0	0	0	0	0	0	0	0	4		0.000580181	2.30582e-05	0	0	164.219	485.785	197.176	0	0	0	213.225	0	253.048	145.256	0	0	356.016	205.086	1029.42	112.432	697067
936	M106T10	106.1	106.1	106.1	10.0954	10.0626	10.4066	6	0	0	0	0	0	0	0	0	0	0	0	0	0	0	0	0	2	3	0		0.000589654	2.33563e-05	148.615	199.494	243.555	2589.16	202.975	168.159	346.17	180.482	218.969	36.9668	418.869	110.931	890.786	93.0912	591.066	391.225	5785.48	12158.5	186.47
937	M124T17_2	124.1	124.1	124.1	16.9552	16.901	17.0093	2	0	0	0	2	0	0	0	0	0	0	0	0	0	0	0	0	0	0	0		0.000591613	2.34177e-05	996.936	557.824	504.395	5279.23	1456.04	411.744	946.158	1487.32	817.074	522.649	1793.53	1649.66	458.716	573.865	1102.12	1145.06	1279.46	2014.39	993.895
938	M202T15	202.2	202.2	202.2	15.122	15.1186	15.1255	2	0	0	0	2	0	0	0	0	0	0	0	0	0	0	0	0	0	0	0		0.000592253	2.34378e-05	247.169	4.66116	3.70463	12070	80.8318	0	49.8925	17.4094	60.9808	16.531	102.397	24.7606	9.72721	0	1716.86	45.2256	619.161	9.65237	23.9611
939	M64T14	64	64	64.1	14.4344	13.8972	14.7096	7	1	0	0	2	0	0	0	0	0	2	0	1	0	0	0	1	0	0	0		0.000594407	2.35052e-05	3010.62	611.399	398.494	5607.01	942.106	171.444	2272.38	1831.51	1044.55	2116.56	1270.28	4236.22	101.489	754.586	488.412	10325.5	6684.28	578.387	390.937
940	M63T10	63	63	63	10.1042	9.95173	10.1322	6	0	0	0	1	0	0	0	0	0	0	0	0	1	0	0	0	2	2	0		0.000595265	2.3532e-05	217.433	141.064	148.823	1857.3	240.729	145.818	205.54	464.589	190.555	88.2376	349.597	110.639	759.889	76.464	209.486	131.279	4602.96	3753.39	219.296
941	M96T18	96.1	96.1	96.1	17.9746	17.829	18.0056	3	0	0	0	2	0	0	0	0	0	0	1	0	0	0	0	0	0	0	0		0.000596748	2.35783e-05	1206.37	601.756	840.644	23889.7	1458.31	759.698	2761.74	1432.86	939.729	772.325	3329.21	1209.8	745.372	692.136	1207.78	1638.78	2940.07	1534.38	2677.1
942	M105T17	105.1	105	105.1	17.2991	16.9865	17.7492	68	3	3	1	4	3	0	1	1	4	0	4	1	1	2	1	3	4	3	3		0.000596905	2.35832e-05	18010.8	32938.7	10297.4	102146	31287.1	22840.3	31541.9	24703.1	24294.3	1240.54	42183.3	15413.9	7656.2	16572.4	36374.9	36577.9	26606.9	23782.9	23507.3
943	M134T11	134.1	134.1	134.1	10.9363	10.608	11.1034	15	0	0	0	2	0	0	1	0	0	0	0	0	1	0	0	0	4	4	1		0.000598437	2.3631e-05	441.126	450.134	469.191	4431.73	462.337	914.326	1569.51	924.637	495.4	356.949	1214.66	537.667	3744.76	524.115	1585.04	1149.43	9428.73	42575.8	2617.4
944	M79T10	79.1	79	79.1	10.1119	9.81087	10.5423	13	0	0	0	1	0	0	0	1	0	0	0	0	0	0	0	0	4	3	1		0.000600243	2.36872e-05	1216.93	519.745	1533.99	10918	677.576	617.641	1675.88	1770.46	767.652	923.057	1838.28	784.116	1190.32	462.083	1261.44	768.517	91887.4	47627.9	16252.6
945	M117T17_1	117.1	117.1	117.1	17.216	17.1224	17.3986	72	0	2	1	3	3	3	3	3	3	0	4	1	0	2	3	2	3	3	5		0.000606012	2.38676e-05	16236.4	25431.6	12039.6	33208.1	24954.7	19883.6	24199.3	22342.9	20341.3	6590.03	29553.7	13276.5	9960.28	14851.2	26930.1	25659.5	18296.4	19147.4	24986.2
946	M29T8	29.1	29.1	29.1	8.30133	8.0469	8.34648	11	0	0	0	3	0	0	0	0	0	0	0	0	0	0	0	0	0	4	3		0.000616615	2.41974e-05	9628.46	2080.93	1570.22	268662	1268.1	2118.58	1948.32	19482.7	7982.15	2611.21	120768	9127.25	2547.55	6150.87	2295.4	3437.39	15299.6	929786	593547
947	M98T10_2	98.1	98.1	98.1	9.7387	9.51243	9.75755	12	2	0	0	0	0	0	0	0	0	3	2	1	1	0	0	0	1	0	2		0.00061958	2.42892e-05	7646.38	813.067	756.529	1683.3	964.809	1056.85	3024.79	4669.58	1047.42	8856.86	5738.57	1467.81	6678.12	633.078	2867.99	2390.38	7859.71	1867.67	21436.8
948	M133T17	133.1	133.1	133.1	17.2992	17.0192	17.7452	82	3	3	1	4	3	2	3	3	2	0	5	3	1	2	3	3	5	2	5		0.000621875	2.43601e-05	22873	34298.8	19280.6	65406	34267.1	31712.4	36262.8	32715.8	31929.7	12990.1	42769.5	24211.2	16495.4	23948.3	37616.9	36046.4	31796.7	23849.7	30806.4
949	M141T11	141.1	141.1	141.1	11.0638	10.7562	11.1516	6	0	0	0	0	0	0	0	0	0	0	0	0	0	0	0	0	0	0	5		0.00062793	2.45466e-05	581.841	254.371	239.398	829.292	258.768	269.679	662.049	627.127	192.204	199.714	863.608	368.059	397.183	180.202	665.752	463.711	541.491	397.903	500579
950	M115T11	115.1	115	115.1	11.0672	10.9305	11.4509	9	0	0	0	0	0	0	0	0	1	0	0	0	0	0	0	0	1	0	5		0.00062804	2.455e-05	2797.57	5564.89	1626.66	5578.64	5075.37	4864.37	6445.75	5236.61	6100.5	916.143	6074.96	2167.35	2802.8	2139.01	5561.38	4980.3	4082.13	7361.5	58192.1
951	M146T13	146.2	146.2	146.2	13.1048	13.0832	13.1158	3	0	0	0	3	0	0	0	0	0	0	0	0	0	0	0	0	0	0	0		0.000633621	2.47213e-05	75.4922	76.8764	183.124	70310.1	237.697	32.5277	34.3096	538.206	430.624	26.5143	200.403	245.831	65.6106	18.9797	191.807	113.927	436.334	19.9775	41.6836
952	M189T12_1	189.2	189.2	189.2	11.6156	11.3139	11.7597	7	0	0	0	3	0	0	0	0	0	0	0	0	0	0	0	0	3	0	0		0.000634488	2.47478e-05	661.792	31.7238	84.717	34170.8	79.4088	12.7195	11.458	81.8466	623.978	16.0558	33.5908	90.1646	105.856	12.1693	3203.46	437.261	10073.5	39.7182	61.4232
953	M80T13	80.1	80	80.1	13.0938	12.801	13.507	15	0	0	1	4	2	0	0	2	1	0	1	1	0	0	0	0	1	0	0		0.000639039	2.48869e-05	1122.13	170.736	8168.93	851812	30055	483.765	555.117	15473.7	12428.8	502.587	9621.35	13669.5	3398.38	152.607	6677.15	3188.5	21342.4	873.45	1677.82
954	M51T19	51	51	51	18.7638	18.7307	19.0075	5	0	0	0	0	0	0	0	0	0	0	0	0	0	2	0	0	2	1	0		0.000643399	2.50198e-05	4659.98	4847.77	3301.11	6440.38	4588.47	3517	5292.39	4922.2	3809.23	3647.54	7476.56	3906.98	2369.07	11182.3	5566.54	6608.69	6647.73	89817.9	4390.8
955	M146T21	146.1	146.1	146.1	20.9617	20.6167	20.9853	4	0	0	0	2	0	0	0	0	0	0	0	0	0	0	0	0	1	0	0		0.000643664	2.50279e-05	463.634	469.416	355.135	3694.84	460.502	384.604	262.505	495.706	536.826	318.163	630.973	352.512	356.249	423.938	820.506	368.851	8266.4	251.413	276.84
956	M69T23	69.1	69.1	69.1	22.7798	22.5165	22.8729	14	2	0	0	1	0	0	0	1	0	0	2	0	0	1	0	0	2	4	1		0.000644854	2.5064e-05	25128.4	26319.8	11548.9	25827.4	16916.4	14269.6	18735.7	25539.7	15071.3	10449.5	35609.8	14240.3	8487.6	21891.1	24324.2	20052.1	25592.3	452430	14462.3
957	M175T20	175.1	175.1	175.1	20.326	19.7273	20.8106	18	0	0	1	1	1	0	2	0	1	1	3	2	0	0	1	2	1	0	0		0.000646198	2.51049e-05	4552.37	5077.35	5667.96	7447.51	5894.03	4624.02	6771.4	5994.9	5769.45	4477.63	8129.39	5591.16	3037.62	4525.42	6933.56	7842.98	9522.03	4380.88	2816.09
958	M50T14_1	50	50	50	14.4394	14.4297	15.0687	27	1	0	0	4	1	0	2	1	1	1	2	0	0	1	0	3	5	2	0		0.000646311	2.51083e-05	5707.38	2347.87	1662.05	8406.62	2222.3	1151.49	5771.48	4158.63	3656.2	3684.3	5320.15	6060.95	731.051	2356.15	3035.78	18159.2	13944.6	6651.13	2178.35
959	M78T7_2	78.1	78	78.1	6.93426	6.92448	7.10407	8	0	0	0	0	0	0	0	0	0	1	0	0	1	0	0	0	4	2	0		0.000648548	2.51762e-05	341.89	177.859	381.978	966.401	297.301	309.079	5885.61	276.246	362.45	446.737	367.429	166.463	12370	151.754	5705.84	1144.39	103610	35511.8	2942.74
960	M165T23	165.1	165.1	165.1	23.0894	23.0786	23.0969	3	0	0	0	0	0	0	0	0	0	0	0	0	0	0	0	0	0	3	0		0.000649641	2.52093e-05	1468.15	2064.28	1629.61	2611.28	2134.08	1717.3	1681.39	1864.66	2351.43	1580.4	2721.67	1522.32	1354.84	1723.96	2195.46	2295.85	2831.33	49818.3	1462.98
961	M137T16	137.1	137.1	137.2	15.9744	15.2326	16.2717	31	3	0	0	0	2	0	0	1	1	1	3	2	0	0	0	1	5	3	2		0.000656235	2.54108e-05	5744.11	494.37	673.95	1229.98	2982.3	698.975	2365.75	2060.83	790.65	1768.11	4772.39	2562.48	636.265	276.286	962.094	3256.04	8125.56	233980	3545.37
962	M101T10	101.1	101.1	101.1	10.2958	9.88397	10.4261	13	0	0	0	0	0	0	0	0	0	0	5	0	0	0	0	0	0	0	4		0.000658161	2.54695e-05	2202.66	2652.11	1798.58	3441.67	2255.48	2741.53	1860.29	2305.66	1853.24	1689.7	20417.9	1603.25	1868.01	1810.21	2221.28	1692	1752.53	1936.56	160051
963	M140T14	140.1	140.1	140.1	14.1715	13.9955	14.1983	3	0	0	0	0	0	0	0	0	0	0	1	0	0	0	0	0	0	2	0		0.000661597	2.55741e-05	876.138	166.011	174.543	344.964	278.355	48.2285	245.942	250.332	116.546	149.36	1396.31	389.488	499.648	164.751	274.533	364.408	292.927	2748.89	7863.74
964	M91T17	91.1	91.1	91.1	17.2992	17.1196	18.1756	61	1	3	0	4	2	3	3	2	2	0	4	2	1	1	2	2	3	3	3		0.000666855	2.57336e-05	33421	59508.8	17892.2	215909	56303.4	46396	62195.3	49287.6	40897.6	2748.19	85345.5	28406.5	16777.7	30777.8	67005.8	60310.5	46732.2	42071.2	49447.6
965	M84T16	84.1	84	84.1	15.6939	15.3089	16.2717	13	0	0	0	0	0	0	0	0	0	1	1	0	0	0	0	1	2	4	0		0.000671629	2.58779e-05	0	0	0	0	0	0	0	0	0	14453.9	15439.6	0	0	0	0	18269.4	14244	1.06422e+06	0
966	M91T10	91.1	91	91.1	10.1007	9.96177	10.4066	9	0	0	0	1	0	1	0	0	0	0	0	0	0	0	0	0	3	2	0		0.000674895	2.59764e-05	867.06	680.447	1415.47	10592.6	957.067	1625.06	1625.61	814.467	982.801	607.393	1828.45	554.185	1412.53	755.783	1028.89	1096.47	66536.1	43544.1	1135.12
967	M43T27	43	43	43	27.3608	27.0443	27.7001	22	1	0	0	0	0	0	0	0	0	0	0	2	2	1	0	0	4	0	0		0.000677033	2.60408e-05	517929	625754	509461	570608	494585	526743	536387	516919	584481	466585	566406	391726	537433	483234	521654	513529	465990	425643	365554
968	M145T12	145.1	145.1	145.1	11.691	11.4431	11.7819	6	0	0	0	3	0	0	0	0	0	0	0	0	0	0	0	0	3	0	0		0.000682433	2.6203e-05	254.947	392.04	328.213	4241.61	321.735	324.751	350.575	374.238	495.353	229.626	388.532	342.291	221.02	211.38	282.751	386.823	3248.43	259.4	686.051
969	M92T23	92.1	92.1	92.1	23.0786	22.8729	23.0969	3	0	0	0	0	0	0	0	0	0	0	0	0	0	0	0	0	0	3	0		0.000685029	2.62808e-05	529.422	595.641	435.084	422.382	625.41	506.258	433.438	446.381	304.349	319.008	689.338	440.713	312.182	412.569	603.263	481.892	14040.3	117871	303.807
970	M71T12	71.1	71.1	71.1	11.8936	11.5858	12.031	56	3	1	0	4	3	0	2	3	1	2	4	2	0	4	3	3	4	4	5		0.000690439	2.64424e-05	121464	22476.4	24327.9	81413.6	87963.1	17838.2	70827.9	63094	40369.6	34919.5	119156	51173.8	23194.9	61583.9	94036.1	108682	61496.4	41191.1	157342
971	M87T7	87.1	87.1	87.1	6.86537	6.85828	6.89965	4	0	0	0	0	0	0	0	0	0	0	0	0	0	0	0	0	0	0	4		0.000693789	2.65423e-05	9984.32	14282.8	9243.2	13866.2	11850.3	12191.4	13127.1	13421.8	11062.8	8595.12	14087.2	7871.12	9480.24	9380.28	18722.4	9713.34	11068.9	8379.77	141944
972	M43T37_2	43	43	43	37.3938	37.1403	37.594	14	0	0	0	0	0	0	0	0	0	0	0	2	0	0	0	0	5	0	0		0.00069615	2.66125e-05	271017	330205	275110	286505	290115	298742	303622	292483	311158	249835	311188	297143	239254	273710	295799	301820	456040	233937	214040
973	M97T8	97.1	97.1	97.1	8.25525	7.86842	8.4636	21	2	0	0	1	0	0	1	0	2	0	5	0	2	0	1	0	1	0	2		0.000703025	2.68164e-05	11008.8	6308.48	4340.88	7902.99	5629.01	5862.34	10430.5	4957.8	5606.82	4057.48	745168	3793.05	17367.6	3339.52	12599.1	7714.12	27628.9	2767.27	10527.7
974	M221T16	221.1	221.1	221.1	15.7019	15.3428	15.7703	24	1	0	2	0	1	1	2	0	1	1	0	3	0	1	1	3	2	2	0		0.000704347	2.68555e-05	4315.94	2309.19	5505.36	2099.81	7561.34	2242.6	4883.49	615.737	2459.89	5121.6	1010.33	5258.49	2128.75	4550.06	1869.37	7378.32	4286.74	1592.44	246.55
975	M56T13	56.1	56.1	56.1	12.7696	12.1475	13.4205	99	4	3	4	4	2	4	4	3	4	3	5	4	3	4	3	3	5	4	5		0.00070852	2.69787e-05	61949.7	68694.1	72283	79187.7	71262.3	69056.5	66329.9	67471.1	59966	60216.4	80628.2	59358.5	55450.4	58620.4	93819.2	78157.9	65720.9	58685	131575
976	M43T30	43	43	43	29.8447	29.1908	30.4299	36	2	0	2	0	0	0	0	0	0	1	0	3	0	0	0	0	4	0	0		0.000710089	2.70249e-05	372115	432145	264631	392262	341305	382205	370603	356619	406764	426441	401799	673735	308930	356092	363536	366258	548854	302005	264083
977	M122T12_1	122.1	122.1	122.1	12.3555	12.1138	12.3677	13	1	0	0	0	0	0	0	1	1	0	5	0	0	0	0	1	1	3	0		0.000710522	2.70377e-05	3538.95	177.99	362.906	941.799	135.721	619.665	299.672	2240.25	2137.59	965.216	15957.3	489.277	317.082	125.583	596.199	2219.93	3672.62	13984	1325.29
978	M91T20	91.1	91	91.1	20.0464	19.7115	20.2889	9	0	0	0	3	1	0	0	0	0	0	0	1	0	0	1	0	1	2	0		0.000719955	2.73146e-05	970.554	1554.3	1163.74	38619.7	5578.6	1377.62	1256.89	1227.12	1500.76	888.658	2990.78	3690	761.735	1004.55	9973.05	1578.32	14125.6	29137.8	1934.12
979	M120T20_1	120	120	120.1	20.3722	20.0081	21.0088	40	3	0	1	4	2	1	2	1	0	1	2	3	0	2	1	2	3	3	0		0.000722222	2.7381e-05	11191.3	1529.4	4242.78	10722.4	12814.6	1984.56	6570.77	3323.27	2040.98	6453.19	42808.5	4880.87	2106.23	4495.35	3794.93	10041.3	9598.3	58626.3	1977.87
980	M151T24	151.1	151.1	151.1	23.5023	22.8768	23.6093	61	1	3	1	3	2	3	4	2	2	0	4	2	1	1	3	2	4	3	4		0.000724406	2.74448e-05	7968.01	14939.2	6245.25	12225.1	12456.8	11897.4	13115.5	11720.2	11909.7	3313.09	16312.3	6668.07	4419.77	9333.93	16530.1	13518.9	11945.5	9364.66	9568.05
981	M191T18	191.2	191.1	191.2	18.167	17.81	18.1771	14	2	0	1	0	2	0	1	0	0	0	1	1	0	1	1	0	3	0	0		0.000724442	2.74458e-05	5862.03	561.395	3782.33	5652.32	7587.2	241.556	5367.84	906.719	2662.19	3907.25	7092.18	3490.25	386.831	2969.74	2264.01	10373.2	13847.3	1470.67	1410.07
982	M95T17_2	95.1	95.1	95.1	16.8014	16.5785	16.9087	6	0	0	0	2	1	0	1	0	0	0	1	0	0	0	0	0	0	0	0		0.000726217	2.74976e-05	3480.98	1465.73	1427.7	18292.2	7115.94	1352.55	9007.94	2539.25	2091.37	2063.47	14873.6	3996.48	1438.25	1208.56	4532.07	4759.53	4518.63	8493.19	8035.91
983	M93T21	93.1	93	93.1	20.8947	20.6156	20.9853	16	0	0	0	4	0	0	2	0	0	0	0	0	1	0	1	1	1	4	0		0.000727048	2.75218e-05	1305.76	742.186	1261.38	22306.2	2092.8	750.452	3385.99	1280.27	991.846	769.636	1770.17	1040.3	1322.73	1367.2	3722.24	2557.85	26527.2	450864	1800.52
984	M159T16_2	159.1	159.1	159.1	16.2964	16.1624	16.7885	19	0	0	0	3	3	0	1	0	0	0	1	1	0	0	2	1	2	1	0		0.000732487	2.768e-05	1704.07	622.191	781.415	3360.69	8851	378.042	2047.26	1008.03	1391.19	1212.71	3270.18	1811.46	375.988	611.421	10330.1	4768.53	3927.62	1881.37	789.024
985	M150T13	150	150	150.2	12.7696	12.3616	13.1158	28	2	1	0	3	1	3	0	0	1	1	3	1	0	1	1	0	5	3	0		0.000737031	2.78118e-05	4266.89	5171.71	4069	50185.4	5293.76	5378.84	4165.14	4596.25	4159.59	4695.57	5750.6	3985.33	3537.85	3980.86	6687.56	5124.65	21519.8	4933.15	5888.68
986	M87T8	87.1	87.1	87.1	7.79957	7.39935	8.10717	8	0	1	0	0	0	0	0	0	1	0	0	0	1	0	0	0	0	0	3		0.000739065	2.78707e-05	5515.93	21389.1	9310.9	9861.86	8618.94	15077	11534.8	10843.4	19191.8	12729	11822.2	5165.72	24759.4	7371.79	18182.1	9764.11	6314.82	6444.88	64599.7
987	M88T33	88.1	88.1	88.1	33.0379	32.5827	33.4631	83	1	0	2	2	0	2	1	0	2	2	4	0	3	0	2	1	0	3	5		0.000739552	2.78848e-05	339002	446444	356958	643222	393137	552083	462455	420811	569296	438472	274751	333267	355096	370029	280106	288974	347894	244498	398516
988	M70T8	70.1	70	70.1	8.26694	7.93575	8.56023	22	2	1	0	3	0	0	0	0	0	0	5	2	1	0	0	0	1	4	2		0.000749654	2.81759e-05	15822.6	7259.83	4974.19	21181.8	6826.14	8423.05	12853.1	8678.16	8103.02	6027.21	558112	8454.63	21793	4635.93	17032.8	12203.9	30656.3	45658.3	90754
989	M105T16_2	105.1	105.1	105.1	15.7016	15.2326	15.8299	72	3	3	3	4	3	4	4	3	4	0	5	4	1	3	3	3	5	4	5		0.000750538	2.82013e-05	60006.3	92447.5	33864.3	93365.9	97232.3	83505.7	106880	92589.6	75397.1	10378.6	110189	47815.3	28744.2	54474.3	114065	106718	71387.1	117996	94562.3
990	M96T9	96.1	96.1	96.1	9.15958	8.88218	9.24713	18	0	0	0	1	1	0	0	0	1	0	1	1	0	0	0	2	1	0	5		0.000753478	2.82857e-05	612.357	542.333	451.883	4667.57	2389.68	559.763	1300.19	752.446	4021.46	1364.24	5339.34	2285.64	2739.21	376.143	2859.08	9083.71	6650.93	583.822	98893
991	M176T12	176.15	176.1	176.2	11.617	11.6118	11.6222	2	0	0	0	2	0	0	0	0	0	0	0	0	0	0	0	0	0	0	0		0.000755795	2.8352e-05	17.445	21.2742	3.05332	2965.13	3.83526	10.1241	9.59572	28.7774	29.2896	25.5992	21.8574	0	8.78642	0	180.553	52.8659	40.1697	8.74985	46.4632
992	M93T10_2	93.1	93	93.1	10.1007	10.0626	10.4091	12	0	0	0	2	0	0	0	0	0	0	0	0	0	0	0	0	4	3	0		0.000762845	2.85534e-05	527.447	266.556	1617.77	6118.61	578.201	300.862	1482.09	619.307	459.374	594.528	1072.91	561.429	1215.68	300.856	514.297	821.526	100022	31031.8	600.481
993	M145T13	145.1	145.1	145.1	12.9495	12.8153	13.1158	10	0	0	0	4	1	0	0	0	0	0	0	0	0	0	0	0	5	0	0		0.00076311	2.85609e-05	387.256	391.917	319.559	78952.5	1882.05	328.72	377.115	466.728	508.757	255.911	414.088	384.032	290.623	183.177	586.07	407.982	78580.3	326.096	463.115
994	M71T25_2	71.1	71.1	71.1	25.319	25.26	25.3744	6	1	0	0	0	0	0	0	0	0	0	1	0	0	2	0	0	0	0	2		0.000764332	2.85957e-05	161042	154784	134551	164115	140335	141932	136625	153874	153243	115299	182773	112465	98123.9	175782	177174	148861	127207	112879	160094
995	M41T15_2	41	41	41.1	15.4945	15.2364	15.5127	7	0	0	0	1	0	0	0	0	0	0	0	1	0	0	0	0	1	3	0		0.000767638	2.86897e-05	17553.1	12693	14217.3	22363.6	17676.9	11168.7	17189	18483.9	13461.7	21629.7	50836	20671.1	10782.7	13360.5	15412.4	17689.4	29534.2	1.88131e+06	20607.2
996	M55T10_1	55.1	55	55.1	9.56312	8.73958	9.98317	63	2	0	0	4	1	1	2	3	2	0	5	2	2	1	1	2	4	2	5		0.0007686	2.8717e-05	76207	9044.12	10516.7	39504.9	30076.9	54480.1	55301.4	52007.4	27838.7	20550.9	118028	29383.2	33932.8	13311.2	25438.5	35519.2	93607.7	46202.4	353079
997	M85T9	85.1	85	85.1	9.1273	8.72925	9.96757	61	2	0	1	3	3	1	4	2	2	1	5	3	3	1	1	2	3	1	5		0.00077729	2.89631e-05	15679.7	7280.17	6966.47	16297.8	12327.1	10679.7	24406.7	10793.8	8985.93	7632.41	29484.3	10374.7	32430.2	8372.48	24428.2	21403.5	39885.2	12420.2	2.57841e+06
998	M39T11	39	39	39	11.0925	10.8136	11.3263	26	0	1	0	4	0	1	1	0	1	2	1	1	1	0	0	0	3	3	4		0.000782839	2.91195e-05	12192	7889.58	6009.95	14835.2	7456.42	7584.05	13729	15233.7	11275.7	8869.64	19281.7	6667.26	11111.7	5129.26	10169.3	9369.34	27807.3	13733.7	456590
999	M64T12	64.1	64.1	64.1	11.6641	11.5858	11.9999	6	0	0	0	0	0	0	0	0	0	0	0	0	0	0	0	0	0	0	4		0.000783561	2.91398e-05	19.9528	4.32041	0	593.611	0	0	0	0	20.9344	0	21.3634	0	0	0	13.4599	8.93667	50.4856	20.6144	84048.8
1000	M117T16	117.1	117.1	117.1	16.0629	15.4982	16.2266	34	1	1	0	2	2	1	1	1	0	0	3	0	0	1	2	3	2	3	1		0.000785122	2.91837e-05	9899.89	12550.4	6517.25	14411.2	13273.6	11426	16102.7	11541.3	10177.5	5511.62	13697.9	8429.61	6628.42	10197.2	18898.1	15682.5	11221.5	32686.2	16028.8
1001	M145T38	145.1	145.1	145.1	38.0858	37.6931	38.4253	39	0	0	0	3	3	2	1	1	0	0	1	0	0	0	2	1	0	1	2		0.000788241	2.92713e-05	21221.7	26626	21287.4	43394.7	34464.5	53159.1	37215.6	30718.9	25554.8	20888.7	35677.4	18688.8	18944.4	21217.3	40387.3	15459	20594.1	21876.3	27447.4
1002	M31T10	31	31	31	9.73432	9.26573	10.4223	33	2	1	0	2	1	1	0	3	1	0	1	1	2	0	0	0	2	4	4		0.000788954	2.92913e-05	25958.1	24980.2	17583.8	28642.8	24169.6	22889	20034.4	41777.9	23422.6	20265.2	24412	16986.1	20827.8	16536	22986.1	18312.4	17863.2	31742.6	39096.7
1003	M121T20	121.1	121	121.1	19.8841	19.7041	20.0312	9	0	0	0	0	0	0	0	0	0	0	2	0	0	0	2	0	2	2	0		0.000791205	2.93543e-05	1792.91	2262.47	1419.5	4623.01	2366.05	1422.32	1870.1	1946.95	1916.82	1530.43	6015.93	1535.02	1423.49	1567.38	18540.6	2162.19	13576	27399.3	1731.37
1004	M105T9	105.1	105	105.1	9.03314	8.7102	9.55323	128	3	3	4	4	3	4	4	2	4	0	5	4	2	3	3	3	5	4	5		0.000792274	2.93842e-05	43935.7	135899	50907.4	128094	111415	116756	107628	72244.5	95207.8	979.264	122449	50088.8	59511.9	47731.3	156357	155622	147701	61863.3	74362.6
1005	M92T12_2	92.1	92.1	92.1	11.5323	10.9312	11.7779	8	0	0	0	3	0	0	0	0	0	0	0	0	1	0	0	0	2	1	0		0.00079482	2.94554e-05	220.125	190.623	119.988	37100.4	154.479	165.123	212.927	502.113	318.373	132.236	312.525	84.2196	9357.9	109.807	329.524	317.284	22745	7288.26	690.746
1006	M43T32	43	43	43	32.2563	31.5509	32.8815	42	1	0	0	0	0	0	0	0	0	0	0	4	0	2	0	0	5	0	0		0.000800083	2.96022e-05	652420	687995	625149	701164	618679	653466	651533	658811	696360	564778	667797	576688	528416	580877	693990	626191	534945	500186	463557
1007	M128T7_1	128.1	128.1	128.1	7.45467	7.44262	7.4756	4	0	0	0	0	0	0	0	0	0	0	0	0	0	0	0	0	1	0	3		0.000800519	2.96143e-05	215.706	233.297	293.784	227.708	232.813	305.712	377.189	281.683	292.25	211.762	320.2	138.994	231.696	288.407	345.242	270.072	5383.37	236.958	20977.7
1008	M60T8	60	60	60	8.07177	8.0453	8.12088	5	0	0	0	0	0	0	0	0	0	0	0	0	0	0	0	0	0	1	4		0.000808627	2.98437e-05	3132.48	3823.2	3156.78	3313.56	3300.26	2977.86	3052.17	3213.44	3262.67	2689.75	3602.61	6764.04	2647.05	2597.33	3342.09	2902.3	3000.52	5432.37	78310
1009	M29T7	29.1	29.1	29.1	7.4604	7.4509	7.60338	4	0	0	0	0	0	0	0	0	0	0	0	0	0	0	0	0	3	0	0		0.000813611	2.99842e-05	476.16	1864.18	1164.4	576.377	666.795	1180.85	3387.67	1445.15	1081.2	1461.78	750.823	0	672.096	2023.59	1882.03	372.755	142187	796.598	63730.1
1010	M81T18	81.1	81.1	81.1	18.0127	17.8367	18.1729	12	0	0	0	3	0	0	0	0	0	0	2	0	0	1	0	0	3	1	1		0.000814835	3.00186e-05	1308.01	988.886	991.668	500971	3018.39	1787.29	5418.55	2122.99	1508.24	1165.34	7073.53	2108.74	716.949	7136.19	4381.81	2720.23	32508.6	25524.2	5509.13
1011	M109T7_2	109.1	109.1	109.1	6.93615	6.71818	6.93618	5	0	0	0	0	0	0	0	0	0	0	0	0	0	0	0	0	4	1	0		0.000819171	3.01404e-05	292.256	257.086	225.158	452.182	217.472	444.64	1524.22	519.026	307.431	264.876	668.097	243.757	1905.82	225.644	1523.1	665.526	15041.1	3000.13	487.483
1012	M40T16	40.1	40	40.1	15.9889	15.8299	16.4402	7	0	0	0	0	0	0	0	0	0	0	2	0	0	0	0	0	0	4	1		0.000822792	3.02419e-05	114.709	0	57.8829	0	0	76.5753	0	0	0	0	10827.4	65.6982	0	0	0	0	179.876	295688	2863.06
1013	M79T21	79.1	79.1	79.1	20.7909	20.6118	21.0164	6	0	0	0	1	0	0	0	0	0	0	0	0	0	0	0	0	1	4	0		0.000839082	3.06958e-05	955.335	1442.47	1025.91	16342.5	1201.04	836.194	1262.42	1494.08	1342.06	1015.35	1346.99	1164.79	735.24	1132.03	1562.54	993.308	27577.2	132646	901.746
1014	M74T14_2	74	74	74	14.4358	14.3303	14.4395	8	0	0	0	0	0	0	0	0	0	0	0	2	0	0	0	2	3	0	1		0.000840151	3.07254e-05	3252.36	1962.55	1409.64	3332.09	1396.46	1337.61	2804.03	2406.09	1729.32	2354.44	2459.25	4045.75	1063.09	1463.13	2054.75	7995.41	5947	1497.32	3363.86
1015	M51T14_1	51	51	51	14.4358	14.3253	14.9642	37	3	1	0	3	0	0	2	3	1	2	3	3	0	2	0	2	5	3	1		0.000842314	3.07854e-05	26179.7	19203.9	12196.4	42966.7	15269.7	11673.7	26447.2	27188.4	22477.5	18409.7	29678.1	25870	7849.02	12991.2	21459.1	56689	62992.6	37700.2	24130.1
1016	M124T15	124.1	124.1	124.1	14.818	14.4319	15.2503	14	1	0	0	0	0	0	0	0	0	0	3	1	0	0	0	2	1	3	1		0.000842897	3.08015e-05	3168.24	384.181	395.727	34788.3	796.126	281.423	645.107	567.605	2604.07	432.526	15271.4	1904.52	466	219.081	666.666	5622.03	2232.55	77799.8	2454.36
1017	M207T34	207.1	207.1	207.1	34.2005	33.7734	34.6735	12	0	0	0	0	0	0	0	0	0	0	0	0	0	0	0	0	0	0	3		0.000852913	3.10779e-05	17446.3	20255.6	18324.8	20278.9	18152.3	17685.7	17743.7	18529.2	21458.5	17533.6	19813.6	16447.3	15620.2	17547	18932.5	18227.5	18091.7	15818	50905.3
1018	M135T16	135.1	135.1	135.1	16.4005	15.8312	16.5862	24	0	0	0	1	0	0	2	0	1	0	3	1	0	0	1	0	4	3	2		0.000854031	3.11086e-05	762.706	403.755	440.201	17852.4	745.41	551.288	5507.95	594.794	1120.59	772.217	6120.42	4450.26	430.017	255.767	5185.06	1425.07	10549	10158.2	20448.8
1019	M63T17	63	63	63	17.2991	17.1275	17.3827	18	1	1	0	0	0	0	1	1	1	0	1	1	0	0	0	2	3	2	1		0.000854263	3.1115e-05	5735.02	7211.25	2607.59	6350.95	7881.3	5968.19	7516.3	7787.61	5557.22	1488.3	13869	5623.11	1939.88	4569.05	9694.41	13868.1	9685.19	7588.22	5580.14
1020	M122T6	122.1	122.1	122.1	5.946	5.2968	6.3755	29	1	0	1	0	2	0	2	1	1	0	0	1	1	0	2	1	5	0	4		0.000856165	3.11672e-05	10935.4	169.301	22637.3	842.332	11756.7	105.348	1947.02	4056.25	4103.72	2786.04	1999.45	6669.79	1142.43	2020.05	3739.05	5773.52	401309	440.325	99743.5
1021	M64T13	64.1	64.1	64.1	13.0867	12.6642	13.1158	5	0	0	0	3	0	0	0	0	0	0	0	0	0	0	0	0	0	0	1		0.000856284	3.11705e-05	8.99773	0	124.207	24570.7	521.568	3.36872	20.5201	222.983	64.729	0	236.234	152.531	21.8217	0	81.1072	20.7238	261.885	3.84445	3470.76
1022	M69T8_1	69.1	69.1	69.1	8.30463	8.05038	8.65692	33	2	0	0	4	0	0	0	2	2	0	5	2	1	2	2	0	2	4	2		0.000857975	3.12169e-05	24542.7	7316.2	5438.34	152424	6771.12	8894.76	15385.7	26084.3	23438.1	5603.36	666612	13844.8	43813.2	13682.3	27569.5	20463.2	64480.6	453840	86612.3
1023	M106T19	106.1	106	106.1	18.715	18.5011	19.2359	8	0	0	0	3	1	0	0	0	0	0	0	0	0	0	1	0	1	0	0		0.000858622	3.12347e-05	854.302	408.987	226.932	20670	1051.04	270.087	437.332	349.222	487.903	320.249	791.65	392.942	107.224	269.607	9099.14	1135.99	2648.92	79017.6	411.533
1024	M69T10_1	69.1	69	69.1	9.57076	9.4009	9.8133	76	4	1	3	3	3	1	4	3	3	1	5	4	2	2	2	2	5	4	5		0.000866108	3.14395e-05	81452.1	14688	18344.5	36297	42262.4	65865.1	72795.3	47465.7	20819.7	25142.1	137489	33908.6	54132.3	20735.5	39887.5	50827.7	127611	56115	178375
1025	M43T13	43.1	43	43.1	12.7696	12.0063	13.1928	98	4	3	4	4	3	4	4	3	4	3	5	3	3	4	3	3	1	4	5		0.000868099	3.14939e-05	262696	301639	313908	335145	308857	301552	284109	288395	261343	264314	349606	239852	225349	253110	402343	336671	253807	250099	420809
1026	M72T8	72.1	72.1	72.1	8.35315	8.05038	8.39345	10	0	0	0	2	0	0	0	0	0	0	3	0	1	0	0	0	0	0	2		0.000868753	3.15117e-05	11734.6	10289.9	9490.46	26896.2	10286	10229.4	11150.9	16575.9	12285.6	9575.58	34098.5	7874.53	24069.3	8422.53	12644.8	11304.8	13261.1	11768.5	40532.7
1027	M38T6	38.1	38	38.1	6.17475	5.9158	6.4608	11	0	0	0	0	0	0	2	0	0	0	0	0	1	0	1	0	5	0	2		0.000870349	3.15552e-05	103.638	318.847	197.856	145.419	377.634	300.833	4510.01	108.823	231.386	191.3	278.015	137.334	5404.76	138.117	4069.55	378.065	70292.9	88.4037	10321.6
1028	M174T19	174.1	174.1	174.1	18.9352	18.9195	18.9381	3	0	0	0	0	0	0	0	0	1	0	0	0	0	0	2	0	0	0	0		0.000872386	3.16106e-05	200.362	168.261	189.817	1698.72	194.704	160.86	110.182	269.412	976.448	117.985	218.823	111.406	49.7746	102.643	61978.6	218.376	249.956	106.662	127.155
1029	M125T12	125.1	125.1	125.1	11.7553	11.5683	12.0158	9	0	0	0	0	0	0	0	0	0	0	0	0	0	0	0	1	0	0	5		0.00087546	3.16942e-05	306.698	258.995	224.604	429.466	402.613	196.937	531.874	399.671	265.028	171.417	635.964	146.583	838.231	127.928	847.157	2610.55	1313	171.534	1.88785e+07
1030	M124T22	124.1	124.1	124.1	21.7126	21.4282	22.2747	18	2	0	2	0	2	0	1	0	0	0	2	2	0	0	1	1	1	1	0		0.000882402	3.18997e-05	7229.78	1378.4	2937.11	3835.07	7528.13	1163.78	3666.9	2375.91	2111.13	4073.31	5707.65	3209.73	1351.06	2333.97	2575.61	6272.85	6773.41	3210.96	1712.56
1031	M60T16	60	60	60.1	15.817	15.7561	16.1763	20	1	0	0	0	1	0	1	0	0	1	0	1	0	3	1	2	2	3	4		0.000888377	3.20761e-05	10083.3	3514.36	3580.4	3486.49	6580.78	2699.28	5366.83	4009.51	2820.35	11313.5	5050.39	4871.93	3838.25	12055	4807.93	5987.6	6382.45	19768.6	58695.9
1032	M149T12	149.1	149.1	149.1	12.2215	12.11	12.2291	7	0	0	0	1	1	0	1	0	2	0	0	0	0	0	1	0	0	0	0		0.00088955	3.21107e-05	1042.77	2209.98	1018.9	5468.16	2483.35	2046.99	2616.04	2079.12	2385.71	302.128	2707.71	860.563	1012.01	1383.8	3336.61	2007.71	2151.81	1403	2249.36
1033	M78T17	78.1	78	78.1	17.3027	16.9102	17.4062	8	0	1	0	2	0	0	2	0	1	0	0	0	0	0	0	0	1	0	0		0.000902334	3.24881e-05	5161.01	12167.6	3448.73	31243.6	10864.4	8500.9	12692	10001.1	7840.81	373.198	15921.8	5162.85	3508.67	6383.72	13500.1	12576	9137.05	9213.96	8055.91
1034	M63T19	63	63	63	18.7638	18.7307	18.8891	3	0	0	0	0	0	0	0	0	0	0	0	0	0	1	0	0	0	2	0		0.00090826	3.26624e-05	372.793	227.608	230.825	621.522	297.893	216.676	403.691	262.325	247.579	245.283	680.805	255.329	68.693	1640.05	390.362	450.812	518.447	3101.22	352.201
1035	M134T9_1	134.1	134.1	134.1	9.05692	8.91703	9.37645	116	3	3	3	4	3	4	4	3	3	0	4	4	2	3	3	3	5	4	2		0.00091605	3.28909e-05	25191.7	73218.1	26640.3	69525.3	59749.1	61758.3	54803.2	40561.8	50607.5	569.71	66559.2	28754	23753	25265.2	82058	84694.7	66249.5	33615.3	46806.6
1036	M80T9	80.1	80	80.1	9.15977	9.15448	9.56717	18	0	0	0	3	2	0	0	1	2	0	3	1	0	1	1	2	1	0	1		0.000918424	3.29604e-05	222.914	534.903	1068.62	25055.3	12194.7	614.649	1101.94	3411.96	21609.5	5005.96	22806.5	11778	1056.44	659.539	7156.19	47953.5	6396.19	1265.31	4066.78
1037	M125T18	125.1	125.1	125.1	18.017	18.0134	18.3439	5	0	0	0	3	1	0	0	0	0	0	0	0	0	0	0	0	0	0	1		0.000926195	3.31874e-05	1266.45	852.837	799.881	8521.39	2229.15	562.61	1310.32	1121.44	681.643	995.014	1766.44	1011.14	500.196	685.018	1196.7	1635.66	1947.08	1685.14	4198.87
1038	M71T9	71.1	71.1	71.1	9.1323	8.82158	9.97488	85	3	0	1	3	3	3	3	1	3	2	5	2	3	2	3	3	4	2	5		0.000929029	3.327e-05	24507.1	12350	12253.1	27582.9	21312.3	19302.8	37956.6	17886	18755.2	14742.3	48524.6	17902.4	51661.6	12143.3	40557.2	37500.8	59436.9	18080.7	1.13568e+06
1039	M128T8	128.1	128	128.1	8.26794	7.85992	8.82487	16	1	0	0	1	0	0	1	0	0	0	1	1	1	0	0	0	0	4	5		0.000935746	3.34655e-05	3247.78	351.079	302.437	3803	360.313	426.011	8796.1	930.145	582.408	457.5	3787.68	5186.24	1834.84	384.51	430.793	562.406	1133.3	14533.7	1.39008e+06
1040	M40T12	40.1	40	40.1	11.6891	11.061	11.8938	12	0	0	0	0	0	0	0	0	0	0	0	0	0	0	0	0	1	3	5		0.000937162	3.35066e-05	0	0	59.7188	1647.92	0	0	0	185.709	0	65.6072	98.8842	40.9315	0	0	0	251.978	4021.7	18926.1	1.40556e+06
1041	M106T21	106.1	106.1	106.1	20.7641	20.2808	20.9781	7	0	0	0	2	0	0	0	0	0	0	0	0	0	0	0	0	0	3	0		0.000937522	3.3517e-05	252.253	339.273	223.094	6714.46	307.421	253.038	299.146	339.845	286.675	228.406	502.928	314.133	151.268	217.669	444.107	303.34	2230.63	19430.5	284.969
1042	M88T30	88.1	88.1	88.1	29.6389	29.0421	30.3042	86	0	1	1	3	2	2	0	3	2	0	1	0	1	0	2	0	0	2	5		0.000943821	3.36997e-05	214203	362926	237535	341524	288898	346422	244143	233234	435516	215448	270318	194329	356491	222251	320293	236523	203633	178227	306854
1043	M115T17	115.1	115.1	115.1	17.299	17.1238	17.3026	9	0	1	0	0	1	0	1	0	0	0	3	0	0	0	0	0	0	1	2		0.000946019	3.37634e-05	5915.88	11297.9	3350.75	10960.9	10212.6	7412.32	9990.42	9032.19	8659.54	956.06	17093.9	4228.12	2783.55	5964.44	13264.7	12270	8099.71	8421.46	9982.65
1044	M54T13	54.1	54	54.1	12.7769	12.5773	13.1628	14	0	0	0	3	0	0	2	0	1	2	1	1	0	0	0	0	1	0	2		0.000947021	3.37923e-05	7262.16	10179.6	9701.08	70133.1	10425.3	9229.73	10175.1	9682.9	7199.88	5170.66	12332.9	7674.56	6752.51	7780.15	13243.9	11064.6	11558.9	6678.36	21018
1045	M126T8	126.1	126.1	126.1	7.62038	7.61045	7.6222	3	0	0	0	0	0	0	0	0	0	0	0	0	0	0	0	0	0	3	0		0.000955743	3.40454e-05	530.86	222.695	173.886	244.033	383.849	627.09	1514.66	195.192	271.934	218.496	731.216	383.303	2560.15	383.466	1741.62	1275.62	4174.05	20971.1	301.017
1046	M138T15	138.1	138.1	138.1	14.6558	14.6402	14.6899	3	0	0	0	0	0	0	0	0	0	0	0	0	0	0	0	0	0	3	0		0.000970945	3.44843e-05	743.511	217.753	432.558	2169.07	753.894	6695.28	539.569	559.744	201.238	543.141	1031.64	362.156	152.802	251.072	703.613	991.063	750.01	18189.3	442.633
1047	M104T7_2	104.1	104.1	104.1	6.86658	6.83675	7.10277	7	0	0	0	0	0	1	0	0	0	0	0	0	0	0	0	0	1	0	5		0.000978807	3.47103e-05	460.147	698.824	631.117	804.53	586.174	1900.35	1094.81	456.255	613.804	456.135	716.793	447.686	1739.41	612.691	842.779	669.676	8131.6	2458.72	20655.5
1048	M45T31_2	45	45	45	30.7007	30.2607	31.0552	45	1	0	0	0	0	0	0	0	0	0	0	4	1	1	0	0	4	0	3		0.000981663	3.47923e-05	2.77255e+06	3.61191e+06	3.02293e+06	3.01388e+06	2.96069e+06	3.15596e+06	3.18993e+06	3.01886e+06	3.30629e+06	2.87177e+06	3.05589e+06	1.68559e+06	3.61119e+06	3.40359e+06	2.91268e+06	3.09685e+06	2.82243e+06	2.53638e+06	2.5574e+06
1049	M68T13	68.1	68	68.1	12.7696	12.3433	13.1853	50	3	1	2	4	2	3	2	0	1	0	5	1	1	1	3	3	2	3	4		0.000982218	3.48082e-05	10226.4	8760	7424.04	296313	11498.1	8790.86	8996.14	8027.8	7497.76	7768.99	39475.4	8882.16	12525	7367.49	10441.4	15353.7	36445.1	60804.4	209744
1050	M117T9	117.1	117.1	117.1	9.1587	8.71263	9.18968	75	1	3	2	3	3	4	3	3	3	0	4	3	2	0	3	3	4	2	4		0.000986671	3.49357e-05	13152.5	29283.1	14255.1	31989.8	26585.4	25538.4	23514.4	31951.4	24885.2	7235.51	29723.5	15383.3	20187.3	12751.5	34115.4	38952.8	26960.5	21955.9	45051.7
1051	M136T6	136.1	136.1	136.2	5.98405	5.75137	6.3755	35	1	0	2	0	2	0	3	3	1	1	1	1	1	2	1	3	5	2	1		0.000995438	3.51861e-05	82035.6	521.807	186687	8647.95	85156.2	536.167	77853.7	35719.4	14788.9	22468.9	15815.6	53565.8	9747.16	19589.6	27031.9	140872	4.41785e+06	10502	611649
1052	M124T17_1	124.1	124.1	124.1	17.4095	17.4062	17.6724	4	0	0	0	3	0	0	0	0	0	0	0	0	0	0	0	0	1	0	0		0.000995573	3.519e-05	634.324	297.513	393.893	15414.7	834.493	250.602	512.91	845.529	324.152	1073.73	1217.61	562.447	767.241	255.479	536.049	619.599	2296.64	1028.31	1583.37
1053	M50T24	50	50	50	24.3121	24.3071	24.3172	2	0	0	0	0	0	0	0	0	0	0	0	0	0	0	0	0	0	2	0		0.000996784	3.52245e-05	657.71	884.918	735.796	872.309	809.597	694.223	804.212	865.694	928.326	657.301	856.767	531.491	498.769	651.433	779.154	668.555	672.013	22215.1	459.691
1054	M41T12	41	41	41.1	11.6989	11.2446	12.0337	23	0	2	0	0	1	1	1	0	0	1	0	2	1	2	0	0	2	1	5		0.00101391	3.5711e-05	28012.4	21948.9	25773	43322.6	35779	20564.6	25090.3	24273.2	33605	26409.2	33227	25287.3	31661.6	20472.6	28861.6	44940.9	53417.8	154243	7.97558e+06
1055	M81T7_2	81.1	81.1	81.1	6.93805	6.72547	6.9474	10	0	0	0	0	0	0	0	0	0	0	0	0	0	0	0	0	5	3	1		0.00101422	3.57198e-05	511.791	560.853	723.375	1451.08	508.37	785.33	3076.37	804.073	826.064	493.332	934.215	567.68	3490.89	565.061	2418.54	2536.43	117572	35804.1	2424.67
1056	M129T7	129.1	129.1	129.1	7.39367	6.91273	7.41543	5	0	0	0	0	0	0	0	0	0	0	0	0	0	0	0	0	0	0	4		0.00101543	3.5754e-05	695.77	658.977	533.577	704.4	670.048	577.286	568.949	504.901	670.443	550.363	587.166	491.46	581.913	486.336	743.411	537.506	2824.8	389.318	23756.5
1057	M108T11	108.1	108.1	108.1	10.9022	10.8238	10.9401	10	0	0	0	0	0	0	1	0	0	0	0	0	1	0	1	1	5	0	1		0.00102687	3.6077e-05	273.314	131.357	178.907	401.882	209.285	2325.54	8119.83	426.311	324.54	263.636	598.624	201.966	21190.4	92.623	8972.28	9865.34	45959	531.297	2394.94
1058	M107T18	107.1	107.1	107.1	17.9968	17.8055	18.4314	25	0	1	0	4	2	0	1	0	0	1	2	1	0	3	0	2	2	3	1		0.00102726	3.6088e-05	2678.35	2880.33	1106.66	48981.8	10152.7	1091.73	4933.8	2524.9	1554.51	5548.46	8014.96	4988.7	684.794	12526.6	3724.42	15432.6	24111.3	25843.4	6767.84
1059	M77T6	77	77	77.1	5.97155	5.78015	6.67193	37	4	0	3	1	0	2	1	0	0	2	1	3	0	1	1	1	5	2	4		0.00104279	3.65241e-05	136505	3180.36	268959	15408.7	65929.8	6170	38761	35427.8	20246.3	31926.5	15803.6	12097.7	26342.7	29622.4	19094.3	74661.4	4.22741e+06	13476.2	1.13258e+06
1060	M175T13	175.2	175.1	175.2	13.0975	12.8154	13.1158	10	1	0	0	4	1	0	0	1	1	0	0	0	0	0	0	0	2	0	0		0.00106046	3.70173e-05	1082.04	79.1135	2836.27	869197	19489.6	299.851	314.709	10432	7750.26	175.61	5762.13	7752.77	1486.26	106.363	2922.77	1767.44	17344.6	325.984	283.47
1061	M151T16	151.1	151.1	151.1	15.9921	15.5	16.0826	40	4	1	3	3	3	0	3	2	2	1	5	2	0	0	0	3	5	1	2		0.00106114	3.70362e-05	48362.1	4383.31	7938.39	10493.1	25171.2	4145.97	28083.2	18357.9	4961.85	12144.3	31696.2	13964.6	4104.95	2267.3	5505.75	24419.5	43199.7	6329.6	31348.2
1062	M104T13	104.1	104.1	104.1	13.0854	12.8077	13.1158	7	0	0	0	3	1	0	0	1	0	0	0	0	0	0	0	0	2	0	0		0.00108196	3.76128e-05	393.425	270.276	832.835	83286.3	3550.2	260.179	249.408	1947.5	1545.77	247.577	1370.2	1529.09	496.89	175.682	657.269	357.459	8131.24	224.055	389.092
1063	M194T23	194.1	194.1	194.1	23.0859	23.0753	23.1005	4	0	0	0	0	0	0	0	0	0	0	0	0	0	0	0	0	0	4	0		0.00108207	3.76157e-05	395.871	434.369	457.13	464.209	758.967	337.81	381.635	551.614	451.345	287.003	1224.42	411.704	151.888	355.185	580.007	1312.95	1374.86	395540	420.906
1064	M134T14	134.1	134.1	134.1	14.3326	13.4951	15.2364	149	3	3	4	4	3	4	3	3	4	2	5	4	1	4	3	3	5	4	5		0.00108302	3.7642e-05	13790.7	28477.3	16598.9	45395.7	23848.5	17710.2	28731.1	27876.6	23326.7	7049.65	40413	29654.9	10084.9	17694.9	30409	25987.6	57352.9	19152.8	30234.9
1065	M107T14	107.1	107.1	107.1	14.4396	13.6009	15.5166	128	4	1	3	4	3	2	2	3	2	3	5	3	2	3	3	3	5	4	3		0.00108451	3.7683e-05	149998	31912.9	28068.9	215342	51709.1	13635.9	113665	97289.9	59946	90744.7	77956.7	184834	7652.68	49546.4	26569.2	494256	497851	60284.6	122170
1066	M125T16	125.1	125.1	125.1	15.9922	15.4591	16.3908	42	4	1	1	1	3	1	2	0	0	2	5	2	0	0	1	2	5	3	3		0.00108637	3.77342e-05	26845.8	2230.03	3727.4	5609.9	14480	2662.13	15311.1	11052.6	2650.79	7064.25	18618.4	7831.3	2324.14	1335.73	3744.47	14506.5	22572.8	23465.1	20426.1
1067	M80T6	80.1	80	80.1	5.95468	5.89283	6.3683	42	1	0	3	2	2	0	3	2	1	2	2	1	1	1	1	3	5	0	5		0.00109513	3.79751e-05	90606.7	759.734	178026	9140.76	101248	897.972	56016.9	37289.9	19144	23833.1	17741.2	61412.5	30227.8	18242.4	19880	98503.6	2.79052e+06	4562.14	733403
1068	M145T31	145.1	145.1	145.1	31.4137	31.0172	31.9703	35	1	2	1	1	0	1	0	1	0	1	2	0	0	0	1	0	2	0	1		0.00109581	3.79938e-05	45094.9	89572.4	29997.6	44149.5	39020.9	37791.4	40048.6	29720.2	44809	36050.5	47277.8	34293	32896.7	37710.3	44637.7	38286.8	46993.9	33124.8	40629.2
1069	M59T16	59.1	59	59.1	15.5166	15.2317	15.8299	7	0	0	0	0	0	0	0	0	0	0	2	0	0	0	0	0	0	4	0		0.00109659	3.80152e-05	17935.7	21435.9	17739.6	19968	19166.1	15527.6	17550.4	21450.7	18269.1	15716.7	92700.1	15367.4	15516.1	18764.8	25895.5	23504.3	13930.8	141485	13229.3
1070	M101T9	101.1	101.1	101.1	9.28478	8.98998	9.60067	16	0	0	0	0	0	0	0	0	0	0	1	0	2	0	0	0	4	1	4		0.00110079	3.81302e-05	3739.81	3337.99	2313.8	2777.9	2575.25	5381.18	3306.37	2878.84	3328.92	1972.85	7354.69	1578.12	19885.9	2051.35	2838.71	2768.3	9269.68	3501.14	235284
1071	M207T30	207.1	207.1	207.1	29.8391	29.3548	30.988	31	0	1	2	1	1	0	1	1	0	0	0	0	0	0	0	1	2	2	3		0.00110303	3.81915e-05	30682.3	41602.2	32591	31158.5	35336.3	33977	37292	38462.4	28409.9	28015.2	33483.1	21450	20561.6	29996.9	29357.1	42265.5	29971.2	30110.5	46044
1072	M71T14_2	71.1	71.1	71.1	13.8902	13.6348	14.0515	11	0	0	0	4	0	0	0	0	0	0	0	1	1	0	2	0	0	1	1		0.0011063	3.82809e-05	8733.74	7180.79	6635.39	228906	14143.3	6599.21	12730.7	9825.24	9009.43	6423.13	23541.1	11536.5	7941.77	6190.22	28652.6	13654.6	12872.4	15249.6	23960.4
1073	M183T19	183.1	183.1	183.1	18.9306	18.9231	18.9381	2	0	0	0	0	0	0	0	0	0	0	0	0	0	0	2	0	0	0	0		0.00110908	3.83568e-05	174.865	217.281	338.543	367.91	299.068	112.828	211.45	192.153	373.707	84.3514	272.418	337.158	128.866	206.777	26828.8	249.211	842.091	300.287	211.919
1074	M99T24	99.1	99.1	99.1	23.8035	23.7958	23.8084	5	1	0	0	0	0	0	0	0	0	0	0	0	0	2	0	0	0	0	2		0.00111306	3.84655e-05	32300.6	30004.3	21892.3	32029.3	28104.2	24216.9	23003.8	29964.5	30014	18140	35021.3	19664.6	13238.9	57181.6	33568.3	29405.9	23317.8	20673.5	26288.5
1075	M80T17	80.1	80.1	80.1	17.2992	17.0055	17.6988	33	1	1	1	4	3	2	2	2	2	0	3	0	1	1	0	2	0	3	0		0.00111426	3.84981e-05	10292.3	15428.8	5140.32	53111.7	17785.9	13410.6	18709.1	16206.3	12792	646.155	23276.6	6392.18	4721.9	8739.31	17737.9	20635.1	12059.7	17973.2	11766.5
1076	M121T12_2	121.1	121.1	121.1	11.5992	10.9242	11.7819	30	2	0	0	4	0	0	0	0	1	0	0	1	2	0	3	1	5	0	0		0.0011228	3.87304e-05	16828.1	269.938	382.147	433074	618.565	366.702	431.82	821.25	2948.4	334.813	391.188	2029.08	60767.2	283.207	52914.8	2708.25	64106.6	2034.05	3061.27
1077	M104T9	104.1	104.1	104.1	9.16655	8.98943	9.17298	11	0	0	0	0	1	1	0	0	0	0	1	0	0	0	2	2	1	1	2		0.00112358	3.87516e-05	2652.6	10600.1	3352.19	11010.6	11272.9	9994.91	7766.84	5817.28	7571.68	526.779	9820.4	3483.99	1756.92	3201.42	12544.4	15940.1	5579.5	6384.69	36629.7
1078	M123T20	123.1	123.1	123.1	20.0313	19.7041	20.4265	17	0	0	0	3	0	0	1	0	0	0	2	1	0	0	2	0	2	3	0		0.00112625	3.8824e-05	1102.93	790.02	668.839	12786.5	992.03	548.868	1585.69	1050.05	764.211	609.439	6072.26	1534.26	536.407	600.336	14119.9	892.391	8383.82	6242.13	840.646
1079	M131T27	131.1	131.1	131.1	26.7546	25.424	27.4866	191	0	1	4	1	3	2	0	0	0	0	3	2	1	2	1	1	4	2	0		0.00112708	3.88465e-05	184973	231940	301182	241805	133730	202401	204485	209701	222601	182989	200773	194370	161164	178077	234553	357525	129866	186031	175792
1080	M52T17	52	52	52	17.2991	17.1273	17.3067	10	0	0	0	0	2	0	1	0	1	0	1	0	0	0	0	0	3	0	0		0.0011309	3.89501e-05	2108.79	3468.5	914.401	4489.65	3910.87	2962.15	3475.59	2929.86	2923.89	370.725	4763.66	2080.64	978.74	1898.81	4014.11	4042.26	3506.74	3684.17	2787.19
1081	M82T21	82.1	82	82.1	21.0167	20.2808	21.5502	38	2	2	0	3	2	2	2	2	0	0	2	1	0	3	1	1	5	4	1		0.0011327	3.89987e-05	10674	14517.7	4933.48	19961.4	9829.94	6419.35	19903.8	20157.2	7029.79	4336.06	15145.6	10663.1	1596.05	25953.3	7018.72	16668.5	32742.7	74789.4	5822.99
1082	M138T17_1	138.1	138.1	138.1	17.406	17.158	17.4096	6	0	0	0	4	1	0	0	0	0	0	0	0	0	0	0	0	1	0	0		0.00114118	3.92278e-05	355.592	135.419	308.52	49428.9	2454.14	105.62	363.855	490.009	333.708	234.505	619.501	339.938	140.718	135.333	477.714	405.577	3190.11	684.476	329.494
1083	M216T19	216.2	216.1	216.2	18.9352	18.9195	18.954	5	0	0	0	1	0	0	0	0	1	0	0	0	0	0	3	0	0	0	0		0.00114728	3.93921e-05	0	8.65983	3.21513	1860.29	0	3.46482	9.95571	31.9792	6729.03	12.8324	21.9972	0	0	3.38582	536645	0	13.3721	0	16.5884
1084	M172T19	172.1	172.1	172.1	18.5796	18.5635	18.9195	5	0	0	0	0	0	0	0	1	0	0	0	0	0	0	1	0	0	2	1		0.00115038	3.94756e-05	37.6548	34.7818	34.0625	76.8441	47.828	30.5147	28.8275	5159.54	47.0455	27.0524	110.813	28.7766	0	42.7818	2166.13	101.681	45.7494	18662.4	2455.7
1085	M51T6	51	51	51.1	5.97157	5.72792	6.3433	60	1	2	1	3	1	1	3	2	2	0	2	1	1	0	3	3	5	0	3		0.00115411	3.95756e-05	57122.8	96685.3	77299.5	66859.8	62312.6	50742.1	70145.2	53691.2	49104.9	44268.9	53478.5	47999.3	74713.8	44606.6	74344.8	71381.3	355013	34419.9	160224
1086	M108T17	108.1	108	108.1	17.1284	16.9117	17.4635	45	1	2	1	4	3	1	2	1	3	0	3	1	0	1	2	3	1	0	4		0.00115507	3.96014e-05	3759.93	6882.23	2759.33	33661.7	6987.81	4686.84	6467.05	6196.94	5173.47	429.996	9419.45	4667.73	1779.96	3069.71	8371.39	7529.9	6062.19	28222.6	6470.96
1087	M41T11	41.1	41	41.1	11.0642	10.8749	11.1516	5	0	0	0	0	0	0	0	0	0	0	0	1	0	0	0	0	0	0	3		0.00115719	3.96584e-05	4063	1685.84	1943.28	9039.99	2781.17	2218.05	2348.41	8979.65	3883.01	4848.01	12015.4	6655.72	1274.96	1575.25	3945.25	2323.51	3247.66	4444.38	1.53838e+06
1088	M124T21	124.1	124.1	124.1	20.9823	20.6118	21.0164	9	0	0	0	1	0	0	1	1	0	0	1	0	0	0	0	0	1	3	0		0.00117618	4.02079e-05	1394.79	1895.08	880.112	3321.89	1426.07	891.211	2562.54	2740.48	1363.73	799.806	2674.41	1246.74	526.133	2661.18	1609.97	1395.58	7417.37	24837.5	789.152
1089	M95T18	95.1	95.1	95.1	17.9899	17.8555	18.1417	10	0	0	0	4	0	0	1	0	0	0	0	0	0	2	0	0	2	1	0		0.00119315	4.06969e-05	2785.02	1700.78	1656.59	79745.1	4231.21	2060.72	7181.16	2217.25	1407.9	1901.4	5250.04	2659.32	657.277	3910.52	4334.21	5887.52	18000.9	6890.97	7313.85
1090	M94T21	94.1	94.1	94.1	20.7706	20.2808	21.0164	8	0	0	0	1	0	0	0	0	0	0	0	1	0	0	0	0	1	4	0		0.00119696	4.08062e-05	453.363	420.665	460.509	5888.04	270.044	449.215	369.141	379.378	432.077	433.784	582.827	831.874	314.698	440.719	687.226	549.115	10831.5	84489.5	370.353
1091	M57T7	57.1	57.1	57.1	6.85828	6.5975	7.09295	11	1	0	0	0	0	0	0	0	0	0	0	0	0	0	0	0	1	0	5		0.00120129	4.09305e-05	9606.97	5044.49	4015.27	8927.05	8404.58	8787.17	17905.8	6979.16	6629.28	4101	9512.1	4768.03	29158.1	5150.54	18824.2	14833.4	51520.6	8729.58	213155
1092	M112T16_1	112.1	112.1	112.1	15.541	15.4626	15.8299	7	0	0	0	0	0	0	0	0	0	0	2	0	1	0	0	0	0	4	0		0.00122108	4.14966e-05	937.731	482.398	455.384	948.347	1069.07	429.328	981.202	954.483	628.59	469.087	40224.1	664.263	1732.89	484	894.072	960.112	778.323	156530	1461.94
1093	M98T17	98.1	98.1	98.1	17.402	17.1161	17.5339	5	0	0	0	2	1	0	0	0	0	0	0	0	0	0	0	1	0	0	1		0.00122117	4.14992e-05	622.454	543.276	461.473	4439.67	1951.56	439.906	785.806	635.268	505.811	399.818	970.636	481.211	338.86	601.819	749.365	1979.19	1016.09	1213.55	2245.96
1094	M109T13	109.1	109	109.1	13.005	12.6642	13.4178	51	1	0	1	4	2	0	0	3	2	1	4	2	2	1	1	3	5	3	4		0.00122493	4.16063e-05	6730.16	389.638	9579.79	1.14892e+06	36785.1	891.642	1847.3	21873	15720.4	2941.5	29295.6	17865	7409.09	3569.53	11568.3	13496.6	67429.7	9333.03	27245.8
1095	M50T13	50	50	50.1	13.1741	12.7887	13.2961	15	0	0	0	1	2	0	0	0	1	0	3	0	0	0	0	1	1	3	2		0.00122632	4.16459e-05	672.331	954.717	694.908	14860.3	2362.03	773.79	810.821	1019.34	1567.27	647.083	2939.65	816.601	558.619	543.748	928.13	1495.8	1948.72	231103	3817.82
1096	M85T11_2	85.1	85.1	85.1	11.0956	11.072	11.2531	13	0	0	0	1	0	0	2	0	0	1	1	0	1	0	1	0	0	2	4		0.0012359	4.19188e-05	18675.2	6964.53	7844.85	35707.9	17599	5926.41	26612.6	26148.5	11782.8	16838.4	40566.3	8274.74	22561.1	5911.55	28354.3	23568.3	21105.2	13337.2	84221.5
1097	M117T30	117.1	117.1	117.1	29.8562	29.6865	29.9764	56	2	3	3	4	3	4	4	3	4	1	5	4	2	3	3	3	1	4	0		0.00124845	4.22747e-05	505477	836682	516429	663763	524264	547155	665941	552763	695466	510356	620017	531169	482669	516021	599366	620320	565618	473160	548365
1098	M96T17_1	96.1	96.1	96.1	17.4055	17.402	17.4096	5	0	0	0	4	0	0	0	0	0	0	0	0	0	0	0	0	1	0	0		0.00125082	4.2342e-05	1048.53	637.692	865.231	120479	3483.37	508.013	1261.08	1571.81	935.375	550.027	1925.68	1553.87	663.789	584.406	1430.63	1405.05	7445.19	1523.54	2803.18
1099	M77T16	77	77	77.1	16.0754	15.4982	16.5861	27	1	0	3	2	0	0	0	0	2	1	2	0	1	0	2	0	2	4	3		0.00126232	4.26668e-05	27283.3	23769.8	16728	30150.7	29765.5	24757.1	38842.3	67645.6	26707.2	11251.7	265720	29001.2	21023.7	22519.9	162836	48114.2	29919.7	1.06071e+07	125800
1100	M109T7_1	109.1	109.1	109.1	7.4585	7.13937	7.82702	13	0	0	0	0	0	0	1	0	0	0	0	0	0	0	0	0	5	3	1		0.00126345	4.2699e-05	384.045	324.498	345.006	480.816	329.343	641.495	3127.41	418.202	324.865	414.356	577.696	320.849	3492.06	287.301	1961.04	707.054	53633	23587.1	8019.35
1101	M140T11	140.1	140.1	140.1	11.0642	10.7333	11.3261	11	0	0	0	0	0	0	0	0	0	0	0	0	0	0	0	0	2	0	5		0.00127307	4.297e-05	811.597	130.683	253.301	507.669	250.4	87.7818	406.784	464.183	222.742	233.998	1207.73	273.642	577.174	230.581	549.56	523.753	2037.5	277.282	5.29694e+06
1102	M179T21	179.1	179.1	179.2	21.204	20.7681	21.2284	9	0	1	1	0	0	0	1	0	0	0	1	0	0	0	0	0	1	2	2		0.00128531	4.33139e-05	1265.76	3458.43	1422.08	2317.97	1610.08	1688.56	1968.99	1868.93	2054.12	1118.34	2967.21	1365.98	817.453	1456.15	2887.08	2026.31	5579.11	35227.9	2089.58
1103	M42T16	42.1	42.1	42.1	16.0036	15.8299	16.2688	8	0	0	0	0	0	0	1	0	0	0	0	0	0	0	0	0	0	4	0		0.00130629	4.39008e-05	4147.33	1090.43	930.968	1713.15	2710.15	914.691	3466.97	1394.19	976.196	1350.84	3511.09	1587.43	704.403	955.116	1243.09	2554.43	4088.21	769309	2413.2
1104	M106T14	106.1	106	106.1	14.4395	13.5985	15.2364	91	4	1	2	4	3	2	3	3	3	3	5	3	0	4	3	3	5	4	4		0.001309	4.39767e-05	177071	38523.7	30803	222726	58772.6	15790.7	134717	108076	62914.8	108154	88492.6	214824	7079.68	58452.9	35596.9	585483	434407	71687.8	143589
1105	M108T6	108.1	108.1	108.1	5.94487	5.75137	6.33775	34	1	0	1	0	2	0	3	1	1	1	2	1	1	1	1	1	5	0	5		0.0013109	4.40295e-05	13677.1	233.961	27749.5	1326.17	14479.1	291.046	4735.12	5702.54	2971.06	4294.99	2691.1	9688.26	1722.76	2697.02	3075.95	8395.2	470590	652.289	117241
1106	M298T29	298.2	298.2	298.2	28.9469	28.8668	29.027	9	0	0	1	0	1	1	0	0	1	2	1	0	0	0	0	1	1	0	0		0.00131384	4.41113e-05	1997.21	838.713	2776.97	2707.09	3123.63	1349.16	1505.2	2754.44	1336.1	3991.55	3065.16	1543.73	775.203	3403.51	2447.34	2721.47	2060.84	810.704	389.946
1107	M74T20	74	74	74	19.6355	19.6325	19.6439	6	2	0	0	0	1	0	0	1	0	0	0	0	0	0	1	0	1	0	0		0.00131673	4.41918e-05	6555.39	8114.64	6797.88	12953.2	7694.87	6425.47	6760.47	9307.55	11998.8	5922.86	13555.6	8759.67	3417.75	8604.61	13240.9	8196.88	11521	7839.34	4389.25
1108	M113T11_1	113.1	113.1	113.1	10.5559	10.2607	10.5629	18	1	0	1	0	2	0	0	1	0	0	1	1	1	1	0	1	2	1	5		0.0013216	4.43274e-05	4179.26	3102.2	2801.71	5262.45	5401.09	3195.66	5239.33	4642.57	3419.95	1236.95	6937.36	4076.11	3871.36	3770.88	6524.76	7508.48	6600.41	3457.94	230549
1109	M44T10	44	44	44	10.4057	10.1007	10.4144	58	4	2	3	4	2	1	4	3	2	2	4	3	0	2	2	3	5	2	4		0.00132948	4.45461e-05	58172.6	45952	40976	52611	51857.4	39336.2	63519.1	57042	40969.5	60550	97282.4	38090	37721.5	35384	51593.2	62906.8	53014.7	35417.6	66031.1
1110	M29T13	29.1	29.1	29.1	13.0832	12.6753	13.1123	5	0	0	0	3	0	0	0	0	0	0	0	0	0	0	0	0	0	0	1		0.00133156	4.46038e-05	1384.75	1245.31	1467.89	243820	4293.15	718.056	777.125	2379.82	2799.03	427.424	2301.48	1345.02	419.881	680.687	3429.1	526.072	1261.04	701.172	43661.4
1111	M44T12	44	44	44.1	11.8244	11.6827	12.3592	46	4	1	2	0	3	1	3	2	0	3	5	2	0	0	1	3	4	2	4		0.00133596	4.47256e-05	53215.1	46669.8	32294.8	40065.5	54041.9	34006.1	51787.9	48469.9	36461.9	54021.5	60108.8	33884.1	30834.3	30765.9	38206.6	60160.8	43323.1	39778.3	65480.6
1112	M136T20	136.1	136.1	136.1	20.2354	19.7079	21.0241	35	3	0	2	4	2	0	1	0	0	2	3	1	0	0	2	1	2	4	0		0.0013423	4.49011e-05	9072.23	1216.38	4286.53	114844	9089.41	1791.5	3722.89	3115.65	2260.46	4421.07	7977.1	3645.28	874.664	1600	5336.81	2823.07	10186.8	15626.3	2184.21
1113	M104T14_1	104.1	104	104.1	14.4321	14.3303	14.9628	15	0	0	0	3	1	0	0	0	0	0	0	0	0	0	0	0	5	3	1		0.00134733	4.50401e-05	4657.96	1175.27	1076.18	14733.3	1786.84	584.699	4420.79	4716.41	3141.39	2452.63	2814.34	5871.27	275.024	1061.23	1067.01	14517.2	37005.4	26074.9	5291.11
1114	M106T17	106.1	106.1	106.1	17.299	16.7812	17.7263	100	2	3	2	4	3	4	4	3	4	0	5	2	1	2	3	2	3	3	4		0.00135546	4.52642e-05	21554	37755.6	11503.6	121551	34928.9	28560.2	37287.5	31426	27690.5	1146.24	47636.3	18924.9	9395.09	19366.5	41328.5	40511.9	29664.4	27280.7	28871.2
1115	M111T13	111.1	111.1	111.1	12.7705	12.0191	13.3967	66	3	1	1	3	2	0	2	2	1	3	5	2	1	0	2	2	5	3	4		0.00136039	4.53999e-05	4536.33	4630.65	4927.29	31354	5628.99	4624.48	5931.23	5904.38	5512.11	4776.32	21434.4	4097.33	5557.52	3804.79	7264.06	6247.16	11292.1	10723.1	172228
1116	M107T25	107.1	107.1	107.1	24.7758	24.0399	24.7949	10	1	0	0	0	1	0	0	0	0	0	1	0	0	0	0	0	3	2	0		0.00137568	4.58198e-05	12178.6	10530.5	8524.33	12768	14649.8	8785.22	10228.9	10282	10344.4	10316.7	16815.2	8431.25	6356.7	8187.59	10594.8	12565.9	45006.8	26358	6896.94
1117	M109T22	109.1	109.1	109.1	21.7131	21.4163	22.2747	32	4	0	2	2	3	0	1	0	0	1	4	1	1	2	1	2	4	2	0		0.00138031	4.59467e-05	13463.2	2162.92	5479.6	7223.53	12105.1	2510.27	6925.82	3752.54	3280.59	8604.43	9347.68	5256.4	2764.59	4593.36	4887.08	11159.2	37420.8	7842.78	2922.44
1118	M43T34	43	43	43	34.0215	33.8423	34.2655	13	1	0	0	0	0	0	0	0	0	0	0	1	0	1	0	0	3	1	0		0.00139381	4.63155e-05	512928	411830	338547	382464	341292	348248	355397	355270	391400	312701	382890	294050	296870	436984	354307	353070	423555	350296	255300
1119	M157T20	157.1	157.1	157.1	19.8789	19.7965	19.8912	8	0	0	0	0	0	0	0	1	0	0	2	0	0	0	0	1	4	0	0		0.0013957	4.63672e-05	1226.35	1483.67	1343	2507.13	1301.55	786.033	1975.26	1659.14	1828.14	807.574	2332.16	1673.66	549.03	3950.44	1403.65	1979.48	7319.57	1996.49	661.732
1120	M65T21	65	65	65	20.8999	20.6129	20.9079	8	1	0	0	1	0	1	0	0	0	0	1	0	0	0	0	2	1	0	1		0.00140193	4.65368e-05	3449.32	3048.53	2975.44	5273.43	4186.59	2343.1	3348.81	3398.03	2327.97	1803.06	4776.82	2507.32	1953.72	2977.89	4071.61	4991.99	7926.36	5248.82	3274.41
1121	M44T25	44	44	44	25.2486	24.6958	25.6641	68	2	2	1	0	0	2	1	1	1	0	1	2	2	3	1	1	3	4	0		0.00140511	4.66234e-05	422255	550995	379998	476372	423432	538529	450728	395007	435119	369507	428534	274606	477184	458497	449059	446329	471796	245061	235679
1122	M123T13	123.1	123	123.1	12.7762	12.4646	13.6846	56	2	0	1	2	3	1	0	1	2	2	2	2	1	2	2	2	4	2	5		0.00142083	4.70502e-05	7008.88	5751.16	7016.2	67485.1	10055.2	5700.12	5872.78	7295.87	7146.66	5987.58	9505.34	5018.03	4696.64	6218.16	10095.4	8729.48	12266	8583.49	15338.9
1123	M143T19	143.1	143.1	143.1	18.9281	18.9195	18.9381	3	0	0	0	0	0	0	0	0	0	0	0	0	0	0	3	0	0	0	0		0.00142281	4.71039e-05	732.597	592.637	660.691	1381.05	983.262	544.951	717.094	541.546	1239.25	614.933	875.613	784.513	530.131	810.654	45849.3	873.247	1197.47	674.928	273.629
1124	M122T20	122.1	122.1	122.1	19.7125	19.7041	19.7145	3	0	0	0	0	0	0	0	0	0	0	0	0	0	0	2	0	1	0	0		0.00142843	4.72558e-05	1046.78	258.3	293.119	1307.71	324.924	418.431	606.019	386.162	658.096	612.224	2729.91	1353.15	386.724	315.118	7462.11	349.576	3752.75	847.624	352.703
1125	M58T13	58.1	58	58.1	12.7696	12.3395	13.1123	57	3	2	4	4	2	3	4	3	2	2	4	2	3	0	3	3	2	4	4		0.00143193	4.73504e-05	16890.2	20102.9	18873.8	22871.6	20598.6	20206.8	19710.2	21376.9	17038.2	17343.2	22809.1	15764.9	16206.3	14973	26832.3	23812.3	15084.2	19598.2	29031.3
1126	M81T23	81.1	81.1	81.1	22.8665	22.8602	22.8729	2	0	0	0	0	0	0	0	0	0	0	0	0	0	0	0	0	0	2	0		0.00146182	4.81549e-05	2295.69	3884.98	1644.8	3739.4	2169.21	1481.46	1728.33	2310.23	2347.37	1906.07	3860.14	1252.46	1093.2	2254.21	3967.99	2018.69	23670.7	35402.7	1855.55
1127	M138T14	138.1	138.1	138.1	14.0163	13.9477	14.3131	6	0	0	0	0	0	0	0	0	0	0	0	0	0	0	0	0	3	0	3		0.00147215	4.84314e-05	228.77	91.3922	104.674	394.982	219.006	446.406	119.083	205.028	97.0322	160.577	499.129	78.367	143.188	15.6134	301.22	147.776	2560.36	468.51	3799.55
1128	M120T15	120	120	120.2	15.0698	14.809	15.5605	38	3	0	2	2	3	0	1	2	1	0	5	0	1	0	2	3	3	2	1		0.00147467	4.84988e-05	26173.8	452.166	16974.9	45303.9	24981.7	5819.5	7034.39	76027.6	11808.7	2930.11	33742.6	26622.8	1905.34	880.62	29025.6	126395	25595.8	134680	72909.1
1129	M76T16	76	76	76.1	16.07	15.6978	16.1443	8	0	0	0	1	1	0	0	0	0	0	1	1	0	0	1	0	0	3	0		0.00147926	4.86215e-05	3404.83	2684.99	1704.37	2806.22	3867	3223.09	4023.52	6613.86	2540.54	959.723	10329.1	2626.24	1623.21	2561.8	5691.74	3736.03	3214.74	62200.3	4184.11
1130	M84T14	84	84	84.1	13.9032	13.5864	14.0603	7	0	0	0	3	0	0	0	0	0	0	0	0	0	0	0	0	1	2	1		0.00148351	4.87348e-05	10313	14824	10720.8	35404.6	12236.5	12003.9	15206.1	14603.4	14550.5	10492.4	17136.8	10850.3	9604.13	11680.1	15224.3	13932.5	22701.6	46361.9	42211.3
1131	M107T17	107.1	107.1	107.1	17.1341	16.822	17.7263	124	3	3	3	4	3	4	4	3	4	0	5	4	1	4	3	3	5	4	5		0.00148495	4.87731e-05	45120.9	78838.1	26193.6	159507	74730.8	61855.3	77969.3	65530.1	58314	3655.96	100065	39881.3	20617	42138.4	86542.4	85285.7	64012.7	72233.9	67267
1132	M134T12	134.1	134.1	134.1	11.6168	11.4431	11.7819	12	0	0	0	4	0	0	0	0	0	0	0	0	0	0	0	0	5	1	0		0.00148928	4.88886e-05	932.013	427.252	294.362	22574.5	547.527	527.965	630.012	442.909	929.442	359.122	682.591	398.92	967.964	458.443	2698.41	899.758	23806.1	1179.53	839.575
1133	M71T11_2	71.1	71.1	71.1	11.2914	11.0916	11.3222	23	0	0	0	4	2	0	1	1	2	0	2	0	1	0	0	1	4	2	2		0.0014956	4.90566e-05	21961.5	15054.9	12401.6	92314.9	33383.9	14052.8	34320.2	44849.5	115003	14495.7	39283.3	30231.3	28542.6	12699.9	23739.1	31461.9	260913	23688.8	79000.6
1134	M92T9	92.1	92.1	92.1	9.1628	9.15448	9.19692	9	0	0	0	2	0	0	0	0	2	0	1	1	0	0	0	1	2	0	0		0.00152284	4.97783e-05	549.484	2250.34	1007.22	14653.6	6861.47	1942.63	2313.98	1694.73	11576.2	2060.38	12662.5	5324.23	2642.4	355.248	6039.71	25448	9381.95	2137.23	1837.05
1135	M38T9	38	38	38	9.16095	9.1591	9.1628	2	0	0	0	2	0	0	0	0	0	0	0	0	0	0	0	0	0	0	0		0.00152318	4.9787e-05	1391.81	1562.57	1222.04	4521.16	2679.69	1451.95	1394.2	2367.65	3714.86	1856.59	3634.4	2561.99	995.858	1148.06	1990.32	4204.38	2406.8	1571.81	3547.5
1136	M94T6	94.1	94.1	94.1	5.95515	5.74313	6.51818	54	1	0	1	1	3	1	3	3	2	2	2	2	1	3	2	3	5	2	5		0.00154084	5.02521e-05	107314	563.56	215986	11241.7	121892	2310.11	66193.1	45959	22995	27751.4	20385.7	71106.9	12547.4	24964.5	27136.1	124413	3.54228e+06	9867.18	940930
1137	M190T20	190.1	190.1	190.1	20.1878	20.1854	20.1934	6	2	0	0	2	1	0	0	0	0	0	0	0	0	1	0	0	0	0	0		0.00155551	5.06371e-05	3335.12	849.966	712.38	2284.28	6722.41	523.701	2334.46	1338.31	1392.04	1522.42	1166.72	1539.52	565.935	1682.21	404.394	8268.55	2536.93	1106.09	1191.26
1138	M140T10	140.1	140.1	140.1	9.81082	9.8074	9.81425	2	0	0	0	0	0	0	0	0	0	0	0	0	0	0	0	0	0	2	0		0.0015599	5.07518e-05	623.478	114.998	129.217	238.072	205.555	189.852	544.701	125.919	170.745	244.747	881.797	126.98	837.417	109.72	381.337	299.89	908.516	7107.81	162.44
1139	M137T21_1	137.1	137.1	137.1	20.7916	20.6129	20.974	10	0	0	2	2	0	0	0	1	0	1	0	0	1	0	0	0	1	1	0		0.0015638	5.08538e-05	2487.98	548.528	1681.15	5154.08	744.225	374.26	1128.94	1953.73	709.02	6552.87	1847.79	1949.59	4587.27	744.594	1123.86	721.602	7579.62	104509	1423.01
1140	M85T12	85.1	85.1	85.1	11.8979	11.4208	12.0338	50	3	0	1	4	3	0	1	2	1	0	5	3	1	3	2	2	5	4	5		0.00157384	5.11157e-05	55463.1	14116.8	13830	52286.6	48674.6	8492.17	38971.6	32844.6	22909.2	17699.8	67093.1	31648.5	18566	37508	59104.5	55167.4	35536.8	26575.4	59683.9
1141	M159T14	159.1	159.1	159.1	14.2658	13.8869	14.4787	8	0	0	0	3	0	0	0	0	1	0	0	0	0	0	0	1	1	0	0		0.00157414	5.11236e-05	668.158	359.437	400.985	18219.6	453.807	369.872	547.763	420.738	2029.62	370.422	740.171	371.147	385.395	319.118	1432.61	1605.26	2128.66	310.359	571.203
1142	M105T19	105.1	105	105.1	18.935	18.4805	19.2335	20	0	0	0	3	0	1	0	1	0	0	0	4	0	0	3	0	2	1	0		0.00158054	5.12902e-05	10016.9	10056.2	8895.34	34895.9	14864.6	8709.84	13925.7	15522.3	10479	4309.49	15821.7	11315.7	4219.38	9735.47	30606.6	15635.8	22822.5	14623.5	10410.8
1143	M138T20	138	138	138.1	20.3683	19.9753	20.4938	10	1	0	0	0	3	0	1	0	0	0	1	0	0	1	1	0	2	0	0		0.00158187	5.13249e-05	8165.53	1232.51	2676.29	3615.73	9564.24	1100.73	4745.85	2167.83	1614.86	4618.02	4907.07	3171.82	1538.47	3090.45	3517.2	5997.04	6518.4	3527.68	1588.23
1144	M297T29	297.2	297.2	297.3	28.9392	28.2021	29.0384	30	1	0	2	1	3	2	2	1	3	2	2	0	0	1	2	2	3	1	2		0.00159433	5.16484e-05	8327.18	5202.74	9586.41	10814.3	16282.8	6753.51	7720.46	13474	7099.26	15773.6	13304.4	4558.49	2771.95	11417.4	11952.1	12461.8	7416.16	3312.44	9714.77
1145	M29T12	29.1	29.1	29.1	11.7119	11.5858	11.8938	6	0	0	0	0	0	0	0	0	0	0	0	0	0	0	0	0	0	0	5		0.00163067	5.25862e-05	1061.13	2391.48	1889.7	11204.2	2403.04	1217.58	3388.89	2635.99	4290.32	1600.37	2571.78	1096.97	1516.13	1865.58	1713.77	5665.58	1234.68	10467.1	2.3889e+06
1146	M44T9_1	44	44	44	9.26965	9.2657	9.56242	23	3	0	1	0	0	1	0	3	2	1	1	3	1	0	0	0	5	1	1		0.0016333	5.2654e-05	35574.8	35042.9	31439.4	40340.7	32865.4	39977.3	31619.2	60095.4	49592.7	34826	44836.2	44327.4	46092.1	27640.3	32658.9	30784.8	54989.9	29911.1	27375.9
1147	M147T12_1	147.1	147.1	147.1	12.2347	11.9985	12.361	11	0	0	0	3	1	0	0	0	1	1	0	1	1	0	0	0	3	0	0		0.00163805	5.27759e-05	1088.38	851.195	910.76	16257.6	2700.82	1130.27	1452.67	1674.6	3227.43	2366.79	1102.51	3089.62	2953.37	848.363	1796.84	1016.26	7296.87	1232.08	3442.92
1148	M136T23	136.1	136.1	136.1	22.8703	22.847	23.3079	6	0	0	0	0	0	0	0	0	0	0	0	0	0	0	0	0	1	4	1		0.00164266	5.28939e-05	614.607	475.191	453.604	664.53	699.632	576.78	680.77	558.133	679.476	680.157	761.154	414.578	457.682	564.464	777.979	703.197	7787.81	123972	1161.98
1149	M118T15	118.1	118.1	118.2	14.5539	14.4243	14.9676	11	1	0	0	2	0	0	0	0	1	0	0	0	0	0	0	0	5	1	0		0.00164379	5.29228e-05	771.886	307.482	270.383	8439.55	400.505	271.784	313.523	431.962	1341.6	270.018	372.154	534.203	186.481	241.036	2436.63	277.182	18583	13256.6	433.402
1150	M38T7_2	38.1	38.1	38.1	7.45468	7.4509	7.4623	3	0	0	0	0	0	0	0	0	0	0	0	0	0	0	0	0	3	0	0		0.00164791	5.30283e-05	21.2487	198.78	273.484	139.503	127.399	193.502	1004.14	149.357	112.016	146.87	197.766	64.5019	105.06	174.946	263.634	188.536	22700.5	221.646	3448.19
1151	M137T10	137.1	137.1	137.1	10.0986	10.0665	10.4066	14	1	0	1	1	0	0	2	0	0	0	0	0	0	0	0	0	5	3	0		0.00165449	5.31965e-05	1179.25	35.931	2970.01	1958.81	872.151	144.55	2911.57	297.103	179.27	1388.15	523.512	492.935	563.883	295.735	703.019	405.072	207876	7173.29	322.921
1152	M96T8	96.1	96.1	96.1	8.29164	8.24053	8.32395	14	0	0	0	4	0	0	0	1	0	0	5	0	0	0	0	0	0	4	0		0.00166702	5.3516e-05	1466.3	758.802	599.564	8832.46	595.9	896.753	1578.4	1353.43	980.922	728.756	130237	1597.36	3751.73	690.017	1525.08	1171.01	8324.6	35461.2	1350.45
1153	M136T16	136.1	136.1	136.2	15.9917	15.2503	16.5786	48	4	0	1	0	3	2	2	3	0	2	4	3	1	1	2	1	5	4	2		0.00166744	5.35267e-05	43751.9	3222.04	5828.49	8222.3	18820.9	4869.84	23194.5	14884.4	3301.71	11505.2	26810.5	11930.3	3879.77	2055.7	5906.39	18806	34968.6	1.18878e+06	18323.8
1154	M37T13	37	37	37	13.0921	13.0832	13.101	2	0	0	0	2	0	0	0	0	0	0	0	0	0	0	0	0	0	0	0		0.00166796	5.354e-05	327.394	313.692	293.516	3708.66	439.565	244.296	284.074	470.164	315.299	302.158	496.178	254.8	301.71	324.524	407.073	303.289	399.462	596.39	1202.49
1155	M161T31	161.1	161.1	161.1	30.6797	30.4987	31.0058	26	0	0	3	0	0	1	1	0	0	0	0	1	2	1	0	1	3	0	0		0.00166828	5.35482e-05	71194.9	90337.5	74270.8	83565.8	74615.1	82771.9	70674.3	80744.8	84746.1	69293.9	80786.4	72783.2	61794.2	89718.6	82040.8	79963.6	97886	64684.5	58338.6
1156	M93T6	93.1	93.1	93.1	5.96394	5.74313	6.51453	92	4	1	3	4	3	1	4	3	4	3	3	3	2	4	3	3	5	3	5		0.00167003	5.35927e-05	815399	5589.27	1.59385e+06	84841	913779	18118	156280	356656	184547	224741	167432	535638	100140	186592	209651	883402	2.53663e+07	54245.7	6.91635e+06
1157	M269T12	269	269	269	12.1366	12.1182	12.2642	6	1	0	0	0	1	0	0	0	1	0	0	0	0	0	0	0	0	2	1		0.00167197	5.36419e-05	2456.31	590.37	1462.9	516.414	1560.84	648.986	1043.87	720.311	858.555	1644.86	1225.43	1279.2	1557.21	1104.1	507.219	2156.88	1923.8	2517.84	2680.02
1158	M131T15	131.1	131.1	131.1	14.9352	14.8236	15.1255	9	0	0	0	2	0	0	0	0	2	0	0	1	0	0	0	0	1	3	0		0.00167789	5.37925e-05	1828.38	1214.99	1482.13	9693.75	2507.22	1562.58	2506.58	2285.86	6659.69	1500.28	4183.19	4438.14	1237.8	2326.12	3603.26	2917.06	5839.4	18481.7	2592.25
1159	M53T21	53	53	53.1	20.8234	20.4446	21.3413	8	0	0	0	1	0	0	0	0	0	0	0	1	1	1	0	0	3	0	1		0.00168301	5.39223e-05	1889.03	1992.67	1701.65	5077.99	1729.04	1891.56	1783.71	2224.37	1964.48	2145.05	2617.2	2586.13	1753.85	2742.64	3417.16	1924.09	9169.03	27616.4	5884.32
1160	M77T15	77.1	77	77.1	14.7022	14.3252	14.9628	13	0	0	1	4	1	1	1	0	0	0	0	0	1	0	0	0	0	3	0		0.00169631	5.42591e-05	6569.16	1864.59	2103.5	350661	7870.72	2829.09	3643.86	3042.24	2354.15	2886.92	3721.49	1179.97	2657.05	810.364	40559.8	2604.19	2395.07	495044	1605.17
1161	M103T17	103.1	103.1	103.1	17.2997	17.1274	17.3147	23	0	1	0	1	1	1	2	1	1	0	2	2	0	0	0	2	0	0	2		0.00169792	5.42998e-05	19096.4	29801.7	16604.1	29655.8	29252.8	26394.3	29304.5	28265.7	23216.4	11397.7	36166.3	17543.3	14616.1	17254.8	30358.4	33259.3	23201.6	22546.7	25782.4
1162	M153T23	153.1	153.1	153.1	23.0969	23.0786	23.3079	3	0	0	0	0	0	0	0	0	0	0	0	0	0	0	0	0	1	2	0		0.0017038	5.44481e-05	1243.02	1225.06	876.933	1525.75	845.189	985.137	797.695	1067.29	974.389	608.153	1568.04	711.913	575.479	922.458	1529.34	955.175	5148.86	11620.9	642.362
1163	M98T19	98.1	98.1	98.1	19.1356	18.9559	19.2245	8	0	0	0	0	0	0	1	0	0	0	0	0	0	2	0	0	2	3	0		0.00170646	5.45154e-05	2608.01	1286.34	1342.38	2366.34	1877.29	1148.48	4247.42	2024.93	1258.28	1813.19	2276.89	1953.99	985.147	7395.57	1118.2	2924.21	6165.91	8287.34	1211.21
1164	M127T17	127.1	127	127.1	17.4134	17.4017	18.017	5	0	0	0	4	0	0	0	0	0	0	0	0	0	0	0	0	1	0	0		0.00170648	5.45159e-05	592.882	593.983	534.206	9294.03	1217.6	510.649	782.164	596.799	588.295	470.961	1076.9	472.349	423.093	506.695	1029.63	853.196	1204.14	520.06	1028.9
1165	M137T27	137.1	137.1	137.1	26.7184	26.6859	26.827	14	1	0	1	1	1	0	1	0	0	0	2	2	0	1	0	1	2	1	0		0.00171008	5.46065e-05	6593.72	3573.39	7286.56	6659.82	5724.09	4985.01	7260.7	17361.3	2618.2	3266.67	12554.6	4266.72	2946.76	7021.87	5101.47	6563.18	8507.92	4527.85	1575.32
1166	M179T19	179.1	179.1	179.2	18.7613	18.0127	18.7728	7	0	0	0	0	0	0	0	0	0	0	4	0	0	0	1	0	1	1	0		0.00172458	5.49711e-05	709.935	274.463	904.163	1031.39	550.353	296.153	665.735	753.006	602.966	380.488	12303.8	456.34	218.917	272.183	27199.5	597.292	732.835	710.153	1682.1
1167	M63T24	63	63	63	24.3084	24.3071	24.3172	3	0	0	0	0	0	0	0	0	0	0	0	0	0	0	0	0	0	3	0		0.00172479	5.49763e-05	1103.19	1261.82	1129.69	1460.59	1040.61	1134.51	1161.43	1292.56	1382.99	1264.93	1466.44	1034.27	1020.34	1170.77	1423.95	1402.12	1208.49	114885	560.101
1168	M149T24	149	149	149.1	23.6777	23.6243	24.1619	19	0	0	2	1	1	0	1	2	1	0	1	3	0	0	2	2	1	1	1		0.00172543	5.49925e-05	17931.1	18185.7	14578.8	24097.6	20550.1	13309	16593.2	15386.3	20921.3	7715.85	19047.7	12440.7	10542.8	17117	19795.9	23586.2	11178.8	16143.1	4138.07
1169	M68T23	68.1	68.1	68.1	22.847	22.7501	22.8729	5	1	0	0	0	0	0	0	0	0	0	1	0	0	0	0	0	0	3	0		0.00174045	5.53688e-05	4623.19	6313.79	1818.89	4745.39	2478.93	2905.02	2776	4246.7	2841.29	1278.46	9084.16	1424	1214.1	1821.92	4433.02	2281.14	2853.76	311881	2457.91
1170	M204T21	204.2	204.2	204.2	20.8076	20.7641	20.8081	3	0	0	0	0	0	0	0	0	0	0	0	0	0	0	0	0	0	3	0		0.00174792	5.55553e-05	80.1038	14.3316	11.4961	56.2154	7.39533	23.2853	23.0993	85.5222	36.4602	35.7364	76.6051	57.5869	16.9014	16.4083	100.753	66.9301	259.485	13809.2	46.2803
1171	M69T19	69.1	69.1	69.1	19.1105	18.7139	19.2283	22	0	0	0	3	0	0	2	0	0	0	0	1	0	2	1	1	2	3	1		0.00175218	5.56617e-05	10794.2	6520.65	8022.76	22489.9	9436.52	4828.02	21254.8	11879.9	7329.16	7060.07	11561.4	8620.18	3724.54	16948.7	22296.8	13067.1	21682.1	72097.7	25083.1
1172	M57T20_2	57.1	57.1	57.1	19.5343	19.1345	19.895	15	1	0	0	2	1	0	1	0	1	0	2	0	0	1	1	0	2	1	0		0.00175269	5.56743e-05	17334.9	19701.8	14584.1	27164.5	22063.7	18726.1	19708.8	15970.5	16111.3	3495.63	22438.6	11092.7	5064.89	25343.3	25797.7	17461.9	20308	12797.8	5790.86
1173	M38T15	38	38	38.1	15.234	15.0651	15.5127	6	0	0	0	0	0	0	0	0	0	0	0	1	0	0	0	1	1	2	0		0.00175435	5.57158e-05	725.76	968.29	574.672	968.53	772.366	700.553	915.906	771.993	802.253	724.942	1018.78	964.678	492.296	629.247	850.215	2686.72	1687.52	98876.3	1030.75
1174	M57T17	57.1	57.1	57.1	16.5784	15.8299	16.5859	35	3	1	1	2	2	0	2	1	0	3	4	2	0	0	1	2	3	4	2		0.0017683	5.60731e-05	28443.2	12613.9	12575.6	29206	28494.8	7616.86	35909.8	19648.5	13341.7	22338.4	69753.2	24784.2	5258.27	12173.7	22915.5	29855.5	42983.3	661525	21159.4
1175	M99T21	99.1	99.1	99.1	21.3253	21.0132	21.4358	6	0	0	0	2	0	0	0	0	0	0	0	0	0	1	1	0	0	1	1		0.00177145	5.61536e-05	9189.91	10695.2	8807.74	18406.9	10882.4	11419.2	10696.4	11183.4	10884	4786.95	13817	7205.52	3779.11	9552.88	17554.4	12996	9154.2	8669.62	5424.83
1176	M120T22	120	120	120.1	21.7124	21.5502	22.2747	29	3	0	1	1	2	0	1	2	1	3	2	2	1	2	1	2	2	1	0		0.00178537	5.65091e-05	10308.7	1298.65	4091.44	4133.17	9730.84	1692.94	4778.96	3081.82	2335.97	6850.3	7153.28	4358.01	2473.94	3535.23	3150.98	8576.3	8866.53	4053.34	1874.94
1177	M113T24	113.1	113.1	113.1	23.8035	23.7958	23.8048	3	0	0	0	0	0	0	0	0	0	0	0	0	0	2	0	0	0	0	1		0.00179306	5.67049e-05	17136.3	15733.7	12171.2	17482.8	13951.7	14479.9	12782.2	16721.3	13824.4	8245.29	18428.7	9600.28	6886.26	35456.6	20048.5	15980.4	14513.4	10011.8	15312.4
1178	M190T19	190.1	190.1	190.1	18.5765	18.5635	18.5895	2	0	0	0	0	0	0	0	0	0	0	0	0	0	0	0	0	0	2	0		0.00179983	5.68771e-05	50.5891	8.62206	52.3692	64.0213	94.6715	6.24465	93.5116	808.046	38.2289	28.5422	95.5812	27.6921	27.249	22.441	122.475	65.187	74.7025	3302.64	444.932
1179	M54T16_2	54.1	54.1	54.1	16.0016	15.9539	16.0108	3	0	0	0	0	0	0	0	0	0	0	0	0	0	0	0	0	0	3	0		0.00181522	5.72673e-05	1094.04	285.246	245.093	424.485	401.887	356.591	820.375	413.206	250.477	332.667	1091.25	252.052	235.704	152.165	316.205	707.832	662.067	243548	1016.97
1180	M91T24	91.1	91.1	91.1	24.3114	24.3071	24.3172	4	0	0	0	0	0	0	0	0	0	0	0	0	0	0	0	0	0	4	0		0.00181742	5.7323e-05	9278.21	9137.45	7475.77	9216.8	8622.19	9662.22	9273.15	9290.76	9569.87	6645.1	10442.4	7973.47	6072.44	9235.59	10802.1	10748.3	41688.8	8.18484e+06	6472.78
1181	M115T13	115.1	115	115.1	12.9351	12.6717	13.1158	12	0	0	0	4	1	0	0	0	0	0	0	1	0	0	0	0	3	0	2		0.00182185	5.74351e-05	997.299	834.813	1928.89	182284	6391.64	815.824	840.328	2689.01	2397.28	868.997	2754.1	2056.08	991.582	2611.82	1935.07	1237.11	52974	758.517	10425.3
1182	M98T6_2	98.1	98.1	98.1	6.39418	6.37322	6.77635	5	0	0	0	0	0	0	0	0	0	0	3	0	1	0	0	0	1	0	0		0.00182853	5.76039e-05	570.099	836.864	401.16	658.231	459.822	1549.74	1747.02	838.378	498.834	374.133	20633.3	359.099	7975.77	636.067	1733.23	999.509	15870	695.639	884.524
1183	M127T25	127.1	127.1	127.1	25.3248	25.3135	25.3363	5	1	0	0	0	0	0	0	0	0	0	0	0	0	3	0	0	1	0	0		0.00183226	5.76981e-05	15511.5	11464.5	8784.38	13926.1	9566.63	10006.7	10507.2	12006.2	9542.42	7534.07	16004.8	7391.03	5600.47	20158.9	12613	10214.5	10822.9	8181.36	9621.68
1184	M121T6	121.1	121.1	121.1	5.94618	5.7456	6.51453	64	3	0	2	2	3	1	4	3	2	2	2	2	1	4	2	3	5	2	5		0.00184589	5.80481e-05	110600	1086.74	224470	12032.5	120908	2688.83	19786.5	45605.4	24313.8	29319.2	21623.8	70057.7	12830.7	25542.3	36744.2	62367.3	4.00694e+06	7794.95	986437
1185	M94T18	94	94	94.1	18.0032	17.9728	18.017	8	1	0	0	2	0	0	0	0	0	0	1	2	0	0	1	1	0	0	0		0.00186484	5.85332e-05	5268.88	1430.99	962.389	18904.6	3361.12	964.88	5821.04	3072.12	1503.44	4542.7	5456	8327.46	592.803	1862.66	2498.68	18370.7	10830.9	3434.46	5738.68
1186	M213T23	213.15	213.1	213.2	23.084	22.7474	23.3422	6	0	0	0	0	0	0	0	0	0	0	0	0	0	0	0	0	1	3	0		0.00187264	5.87322e-05	318.252	307.568	234.437	274.027	291.996	295.07	286.346	303.984	368.866	282.035	640.514	249.973	207.25	292.897	332.481	519.644	22262.2	121368	186.789
1187	M127T21	127.1	127.1	127.1	21.3415	21.3221	21.5541	8	0	0	0	1	1	0	0	0	0	0	1	1	0	2	0	0	2	0	0		0.00187756	5.88576e-05	2499.44	3629.81	2358.72	4664.02	3652.29	3487.03	3305.33	3336.97	3206.59	1177.03	4436.01	2233.38	1078.81	3723.66	5382.97	4068.63	3783.63	2566.47	1382.31
1188	M78T6	78.1	78	78.1	5.97155	5.9158	6.34768	19	1	0	1	0	0	0	0	0	0	0	0	2	1	0	0	1	5	0	3		0.00188319	5.90011e-05	22582.7	246.256	46230.4	1427.66	21337.6	269.687	11678.3	7032.75	4757.14	4053.64	3864.79	14019.1	28040.3	2333.3	12285.1	46612.9	1.23334e+06	596.75	207384
1189	M83T24	83.1	83.1	83.1	23.8041	23.7958	23.8056	4	0	0	0	0	0	0	0	0	0	0	0	0	0	2	0	0	0	0	2		0.00189257	5.92398e-05	13709.3	13280.9	8038.5	13041.8	10090.2	9648.27	7865.88	12399.8	8697.92	5552.66	13847.6	5652.74	4325.15	26613.9	14580.8	10326.1	11408.2	7832.99	14130.9
1190	M74T14_1	74	74	74	13.6456	12.9876	13.9532	15	0	0	0	1	0	0	0	0	0	1	5	0	0	0	3	0	0	1	1		0.00189723	5.93579e-05	1326.64	1195.18	1183.51	1824.03	1317.68	1247.2	1547.05	1317.89	1277.92	3316.49	26477.4	1089.53	947.805	1168.34	76388.6	1300.15	1557.85	43292.1	2615.4
1191	M95T21	95.1	95	95.1	20.6937	20.2391	21.017	18	0	0	0	4	0	0	1	0	0	1	0	0	0	1	0	0	1	4	0		0.00189982	5.94237e-05	1459.48	1287.29	1144.27	17431.3	1305.48	1015.73	2310.21	1984.17	1198	3386.5	3098.95	2550.42	1107.89	2881.13	2265.79	1782.14	43131.1	272737	2867.05
1192	M146T19	146.1	146.1	146.1	18.7139	18.5599	19.2323	11	0	0	0	3	0	0	0	0	0	0	0	0	0	0	3	0	1	2	0		0.00190903	5.96618e-05	1095.97	251.771	264.896	21270.5	371.733	297.835	313.746	397.107	266.001	230.537	847.497	237.196	203.407	234.761	48942.4	259.574	1529.11	2774.98	255.64
1193	M161T35	161.1	161.1	161.1	34.6468	34.2574	34.9785	35	1	0	1	0	0	0	1	0	0	1	0	2	0	1	0	1	3	1	0		0.00192655	6.01187e-05	41011.4	54309.6	55917	48795.7	44541.6	46029.8	61334.9	46112.8	50833.2	29383.4	46892.7	52037.3	36375.5	46889.3	48195.8	82702.1	64793.4	28886.5	35808.7
1194	M83T9	83.1	83.1	83.1	9.35007	8.87055	9.98317	79	4	0	1	3	3	2	2	3	2	0	2	3	2	1	1	2	5	3	5		0.00193976	6.04623e-05	25532.8	1337.89	7613.99	17389.2	18950.6	19111.3	22622.3	68502.9	43157.2	1168.55	37671.4	46763.2	51153.4	3744.56	12392.3	18018.1	80521.6	16258.7	445015
1195	M88T40	88.1	88.1	88.1	39.6187	39.3059	39.9808	65	1	2	0	1	0	3	2	0	1	1	2	1	2	0	3	2	0	1	5		0.00194176	6.05142e-05	313162	425018	304702	345894	316663	303356	367230	320317	416362	338341	414873	262535	422128	293205	481339	422982	272740	237317	229718
1196	M99T14_2	99.1	99.1	99.1	14.3268	14.3056	14.3424	4	0	0	0	1	0	0	1	2	0	0	0	0	0	0	0	0	0	0	0		0.00194809	6.06785e-05	6750.83	4355.54	3392.51	6780.33	8293.55	3560.23	7764.98	14540.3	4377.19	4520.28	11499.3	4921.71	3502.24	3612.25	6188.82	9181.65	4552.08	3058.29	5762.97
1197	M106T16_2	106.1	106.1	106.1	15.7016	15.4626	15.7109	19	1	0	0	2	1	1	2	1	0	0	2	0	1	1	1	0	1	3	2		0.0019712	6.12769e-05	4395.78	6552.49	2046.14	8278.13	7905.98	6383.91	8861.75	7630.86	5635	682.564	9866.88	3480.42	2264.87	3900.64	10257.4	8912.8	5903.17	21476.4	7913.44
1198	M53T10	53	53	53	10.4013	10.1165	10.7082	10	1	0	0	0	1	1	1	0	0	1	0	0	1	0	0	0	1	3	0		0.0019853	6.16408e-05	5245.2	2049.99	1994.89	4235	3300.39	2942.16	4085.15	5096.79	2246.4	3304.41	6918.46	2223.44	3226.51	3623.35	3616.99	4781.2	6158.94	16636.5	29883.2
1199	M138T22	138	138	138.1	21.7143	21.42	22.2747	16	0	0	1	2	2	0	0	0	1	1	1	3	0	0	0	0	4	1	0		0.00199472	6.18834e-05	15752.7	1629.78	5831.11	6636.66	8192.94	2112.06	7471.64	3286.38	3272.9	10630	8528.12	6492.01	3530.17	4667.8	4129.31	11811.1	11633	5981.29	2881.95
1200	M102T32	102.1	102.1	102.1	31.7301	31.0861	32.4126	151	2	2	1	3	2	2	3	1	3	2	4	2	1	1	1	2	0	4	5		0.00200212	6.20739e-05	64632.9	111103	92216.9	71759.7	83948.7	88388.7	121171	158295	115708	130120	101811	68881.1	48834.8	89851.9	90335.7	148841	70442.7	92276.1	40198.4
1201	M142T15	142.1	142	142.1	14.7096	14.4166	14.9628	3	0	0	0	2	0	0	0	0	0	0	0	0	0	0	0	0	0	1	0		0.00200715	6.22031e-05	169.446	116.394	37.2014	2864.49	136.455	119.089	83.9418	315.464	155.966	82.6616	259.244	96.2514	65.4012	36.3254	381.406	85.3919	170.274	1127.13	147.775
1202	M134T18	134.1	134.1	134.1	17.8555	17.4024	18.2063	17	0	0	0	4	0	0	0	0	0	0	1	0	0	1	1	1	2	1	2		0.00203671	6.29605e-05	1323.86	1101.73	866.004	20340.6	1225.01	874.52	1636.08	1528.01	920.493	673.018	2569.96	1283.47	588.19	1356.72	7198.21	3430.51	7188.25	2422.58	4767.27
1203	M160T13	160.2	160.2	160.2	13.1103	13.1048	13.1158	2	0	0	0	2	0	0	0	0	0	0	0	0	0	0	0	0	0	0	0		0.00203878	6.30132e-05	18.9625	16.4655	231.577	64286.4	683.089	24.4485	25.8855	739.373	697.624	0	323.318	478.909	3.85965	7.5568	154.38	32.9165	1411.64	43.8605	61.9526
1204	M87T9	87.1	87.1	87.1	8.93152	8.88218	9.0394	6	0	0	0	0	0	0	0	0	0	0	0	0	0	0	0	0	0	0	5		0.00205555	6.3441e-05	2589.58	5401.39	4114.77	7091.09	4934.89	6337.32	4837.2	5936.48	4330.4	3286.61	6492.58	3323.05	2104.07	3702.13	4774.93	4448.22	3564.14	3197.36	133821
1205	M111T8_2	111.1	111.1	111.1	7.61166	7.60722	7.6393	8	0	0	0	0	0	0	0	0	0	0	0	0	1	0	0	1	2	4	0		0.00205894	6.35273e-05	374.397	213.927	343.986	446.95	468.143	1213.19	1954.69	257.492	571.106	221.554	653.902	462.482	7785.4	2770.79	2503.87	3681.5	13153.9	171244	861.445
1206	M95T23	95.1	95.1	95.1	23.1782	22.7512	24.0589	10	0	0	0	0	0	0	0	0	0	0	0	0	0	0	0	0	2	2	0		0.00207839	6.40217e-05	2464.59	2165.83	1994.88	3450.32	2193.29	1655.08	1739.95	2642.91	2380.89	1533.83	3975.88	1366.16	925.463	2007.82	4093.62	2120.63	26573.6	17460.6	2666.04
1207	M76T14	76.1	76	76.1	13.6278	13.0729	13.9322	9	0	0	0	0	0	0	0	0	0	0	2	0	0	0	2	0	1	2	2		0.00208209	6.41155e-05	407.566	563.165	336.514	571.959	442.744	471.787	533.475	542.408	500.246	325.663	23880.9	344.486	360.486	370.598	78118.2	620.61	976.051	107754	22290.1
1208	M69T22_1	69.1	69.1	69.1	21.7117	21.5541	21.7195	9	2	0	0	0	1	0	1	0	0	1	1	0	0	0	0	2	1	0	0		0.00208559	6.42044e-05	16920.3	6416.14	9722.66	15017.1	17943.7	6205.28	10314.8	8951.11	7730.11	11475.1	17155.1	8164.37	4899.71	8286.6	12383.2	16480.9	33052.1	18709.8	6286.54
1209	M145T39	145.1	145.1	145.1	39.1406	38.5293	39.9923	73	1	0	0	1	1	2	2	2	3	0	4	0	0	0	2	0	1	1	2		0.00212422	6.51802e-05	43553.2	49961.1	40635.1	59489.7	33922.3	40710.9	50997.2	38634.6	50032.5	39962.7	54646.5	35012.4	36273.9	40503.6	47810.8	41786.7	46400.8	27382.5	38614.7
1210	M205T13	205.2	205.2	205.2	12.9552	12.8153	13.1936	10	0	0	0	1	1	0	0	0	0	0	1	0	0	0	1	0	5	0	0		0.00212519	6.52046e-05	22.3663	37.458	64.4309	26771.7	1090.13	3.11321	63.9632	124.907	149.517	13.382	793.35	54.0049	69.9943	31.9416	982.918	31.7186	67033.8	108.868	102.157
1211	M64T11	64.1	64.1	64.1	11.0654	10.9171	11.1516	4	0	0	0	0	0	0	0	0	0	0	0	0	0	0	0	0	0	0	3		0.00212561	6.52153e-05	14.9005	79.1906	55.2042	161.048	164.605	116.999	196.399	75.7019	193.973	0	124.551	54.856	44.5049	69.0721	171.351	164.274	138.161	572.104	53206.8
1212	M79T6	79.1	79	79.1	5.96775	5.89283	6.56678	48	2	0	1	2	2	1	3	3	1	0	1	1	1	3	2	3	5	1	5		0.0021552	6.59581e-05	161509	1249.08	307089	16842.7	173734	10933.9	124081	67959.6	32393.6	44051.5	29523.6	107188	23863.1	33749.9	53773.2	211329	4.84728e+06	14129	1.27441e+06
1213	M82T19	82.1	82.1	82.1	18.8182	18.4222	19.2359	18	0	0	0	4	0	0	2	0	0	0	0	0	0	0	0	1	1	4	1		0.00215628	6.59851e-05	3142.73	1276.75	3437.03	12892.5	2752.51	1166.74	11511.6	4223.11	2228.79	1293.75	3842.8	2227.34	2691.59	2241.35	7491.85	5043.18	6929.46	1.01947e+06	24185.1
1214	M148T11	148.1	148.1	148.1	11.4497	11.4431	11.6148	5	1	0	0	0	0	0	0	0	0	0	0	0	0	0	0	0	4	0	0		0.00216296	6.61525e-05	571.244	156.394	115.373	261.511	163.598	167.678	212.548	415.01	579.13	162.347	182.752	79.1554	201.586	103.373	238.261	205.773	7576.96	90.5158	206.054
1215	M127T16	127.1	127.1	127.1	16.2807	16.2188	16.5748	6	0	0	0	0	1	0	0	0	0	0	0	0	0	0	1	0	0	3	1		0.00218047	6.65898e-05	966.722	663.575	405.452	963.442	2226.57	387.568	1001.56	883.143	841.182	512.569	1947.96	656.822	483.308	470.632	1629.38	1598.69	643.848	15833.1	7223.07
1216	M122T19	122.1	122.1	122.1	18.9548	18.9027	19.2323	6	0	0	0	2	0	0	0	0	0	0	0	0	0	0	1	0	1	1	0		0.00218585	6.6724e-05	674.536	419.578	254.206	8751.41	457.279	314.036	329.222	604.256	494.875	256.276	719.634	372.735	471.453	375.22	17263.6	434.252	4317.88	2821.95	403.123
1217	M37T15	37	37	37	15.24	15.2317	15.5166	4	0	0	0	0	0	0	0	0	0	0	0	0	0	0	0	0	0	3	0		0.00218663	6.67434e-05	190.638	392.599	281.536	322.105	293.919	239.013	295.796	336.655	256.23	160.854	346.707	193.528	196.696	158.191	240.888	209.07	377.257	31060.5	276.97
1218	M193T27	193.1	193.1	193.1	27.4427	27.437	27.4485	2	0	0	0	0	0	0	0	0	0	0	0	0	0	0	0	0	0	2	0		0.00218898	6.68018e-05	1888.02	2709.55	1840.35	2536.58	2164.59	2044.54	2127.83	1928.11	2578.24	1557.49	2502.86	1561.6	1466.17	1703.95	2441.12	2238.21	1676.61	8773.32	2118.78
1219	M206T19	206.2	206.2	206.2	18.716	18.7128	18.7176	3	0	0	0	2	0	0	0	0	0	0	0	0	0	0	1	0	0	0	0		0.00220369	6.71678e-05	239.298	29.0933	47.721	8242.83	22.0279	10.3392	52.9949	42.9099	30.6476	12.878	103.668	14.8479	0	18.0524	3319.42	31.3248	222.071	19.1427	6.64691
1220	M80T18_1	80.1	80.1	80.1	18.0138	18.0127	18.017	4	0	0	0	3	0	0	0	0	0	0	0	0	0	0	0	0	0	1	0		0.0022038	6.71705e-05	419.463	378.639	324.188	83438.4	503.12	332.938	496.197	592.945	427.342	425.432	773.888	560.76	217.418	345.908	684.945	600.351	4573.7	6143.15	726.859
1221	M97T25_1	97.1	97.1	97.1	25.3229	25.26	25.87	8	1	0	0	0	0	0	0	0	0	0	0	0	0	2	0	0	2	0	2		0.00220947	6.73113e-05	19336.6	17804.4	11085.8	19807.9	13936.6	13168.9	12288.7	13695.5	12708.9	7093.86	21674.3	8690.97	6447.38	21701.7	18760.6	15368.9	21457	11434.8	23242.7
1222	M98T8_1	98.1	98	98.1	8.24488	8.05403	8.32955	9	1	0	0	0	0	0	0	0	0	0	5	0	0	0	0	0	1	0	1		0.00222297	6.7646e-05	3622.53	1174.83	1064.62	2465.64	1374.75	1551.48	3658.01	1534.23	1776.87	951.588	187584	1140.23	3897.66	1041	4352.91	1966.81	10968.8	2209.28	9363.63
1223	M177T35_1	177.1	177.1	177.1	34.5134	34.1703	34.8717	65	2	2	2	0	3	1	3	0	0	2	0	2	1	3	0	1	4	3	0		0.00224751	6.82524e-05	230219	337559	233981	292186	324092	244715	257109	269164	301553	165717	285574	241495	223614	269967	276650	228789	235987	215539	150001
1224	M115T6	115.1	115.1	115.1	5.96393	5.63163	6.24268	15	0	0	1	0	0	0	0	0	0	0	0	0	0	0	0	0	5	0	3		0.0022504	6.83236e-05	4119.51	2189.86	7809.6	2747.66	4541.8	2399.15	2675.49	2970.82	3135.01	2084.26	3158.5	3339.18	1825.24	2369.4	2809.88	6556.86	102409	1935.46	28969.6
1225	M123T27	123.1	123.1	123.1	26.7392	26.724	26.9604	7	0	0	1	0	0	0	0	1	0	0	3	0	0	1	0	0	1	0	0		0.00225144	6.83494e-05	6560.3	6479.9	6020.45	7938.9	5754.97	5035.35	6450.37	18820.5	5327.11	3480.15	13579.1	3966.55	3232.18	6482.84	6903.55	6048.15	8437.84	3913.37	2779.99
1226	M85T25	85.1	85.1	85.1	25.3209	25.26	25.4071	11	2	0	0	0	0	0	0	0	0	0	1	0	0	3	0	0	2	0	3		0.002253	6.83876e-05	64984.9	40384.9	31270.5	47424.5	34534.9	34984.8	29640.1	39298.3	37615.1	17656.2	62587.2	27476.6	16753.7	71613.1	49087.9	37762.1	39043	29805.6	81390.3
1227	M110T10	110.1	110.1	110.1	10.1068	9.6692	10.4342	14	0	0	0	0	0	0	0	0	0	1	0	0	1	0	0	0	5	1	5		0.00227225	6.88614e-05	383.671	254.277	595.068	232.571	218.403	186.512	810.95	225.364	227.76	1011.92	617.342	203.302	2113.98	148.868	664.853	356.258	50212.8	860.172	561739
1228	M124T18	124.1	124.1	124.1	18.0832	18.0134	18.1654	4	0	0	0	2	0	0	0	0	0	0	0	0	0	0	0	0	1	0	1		0.00229208	6.93474e-05	513.568	482.769	310.629	25752.5	599.887	302.706	453.994	384.642	400.988	200.804	798.446	401.181	192.279	310.649	430.651	584.692	2867.2	844.43	857.213
1229	M128T12	128.1	128	128.1	11.8234	11.8164	11.9179	14	4	0	0	0	0	0	1	0	0	2	1	1	0	0	0	1	2	2	0		0.00229208	6.93474e-05	4630.96	1305.76	1115.17	2655.41	3366.53	581.545	3516.8	2828.01	1022.09	3403.78	4278.12	1372.2	677.602	458.646	1094.08	4359.76	4249.86	4824.79	5277.79
1230	M112T24	112.1	112	112.1	23.977	23.7958	24.3478	22	0	3	0	2	0	0	3	1	2	0	2	1	0	1	0	1	2	0	2		0.00229625	6.94495e-05	5949.8	24756.1	3727.63	15809.2	5038.2	5428.45	9546.57	15381.7	17132.9	2403.22	12397.9	3763.23	2650.82	5357.87	7097.74	7500.81	5571.23	4679.62	6193.46
1231	M154T16	154.2	154.2	154.2	15.9778	15.8337	16.0087	4	0	0	0	0	0	0	0	0	0	0	0	0	0	0	0	0	0	4	0		0.00231357	6.98727e-05	117.459	55.5723	69.7229	109.706	95.1427	75.4497	74.2839	139.064	100.417	64.0415	369.083	111.081	35.4195	25.8926	106.017	124.693	74.3059	682665	143.376
1232	M110T19	110.1	109.9	110.1	18.8198	18.4185	19.496	20	2	0	2	1	0	0	2	1	0	0	2	0	1	0	0	0	1	4	2		0.00236208	7.10512e-05	4047.12	586.412	5601.42	4227.12	1252.28	773.226	5442.73	5424.23	884.353	1124.33	3863.73	1483.39	3489.95	1070.9	1323.48	1432.66	2911.61	66783.7	11670
1233	M45T9_1	45	45	45	9.28466	9.2383	9.29148	6	0	0	0	0	0	1	0	0	0	0	0	0	2	0	0	0	2	0	1		0.00236376	7.10919e-05	81445.8	81458.2	66131.1	78122.2	72902.8	122054	70335.1	65909.6	77945.6	69744.5	83111.2	69221.2	350495	74495.7	75718.9	72697	174774	70875.3	119204
1234	M121T17_2	121.1	121.1	121.1	16.5785	16.407	16.5824	8	1	0	0	0	0	0	1	0	0	0	3	1	0	0	1	0	0	1	0		0.00237814	7.14391e-05	3010.99	722.639	1017.92	3579.45	3053.79	446.894	5572.51	1043.09	938.885	2293.55	13128.5	3978.78	608.537	824.066	9143.16	1586.97	7546.85	9725.34	1523.97
1235	M126T18	126.1	126.1	126.1	18.0137	18.0132	18.0142	2	0	0	0	2	0	0	0	0	0	0	0	0	0	0	0	0	0	0	0		0.00237876	7.14541e-05	668.749	864.51	532.076	4206.23	853.539	475.09	791.195	729.075	605.553	551.67	1057.78	512.552	290.849	485.588	625.803	1209.69	934.866	1050.59	1172.86
1236	M127T20	127.1	127.1	127.1	20.4492	20.4399	21.0094	29	2	1	1	0	1	0	1	1	0	1	3	1	0	1	2	3	4	4	1		0.00238868	7.16933e-05	6790.61	4457.68	2396.04	5479.64	4900.28	3140.82	7362.21	4739.85	3143.93	3807.62	6716.88	8892.21	1146.75	3843.26	5552.94	21474.7	10546.7	60791.3	8022.6
1237	M341T16	341	341	341	15.7172	15.6903	15.8837	9	0	0	1	0	1	1	1	0	0	1	0	2	0	0	0	0	1	1	0		0.00239159	7.17635e-05	1733.08	20.6481	2591.36	15.45	2084.12	850.408	2016.29	123.599	37.2372	2438.06	0	1633.81	1281.29	1529.69	7.67597	1286.96	1557.65	1028.06	0
1238	M80T24	80.1	80.1	80.1	24.3176	24.3145	24.3207	2	0	0	0	0	0	0	0	0	0	0	0	0	0	0	0	0	0	2	0		0.00239441	7.18313e-05	3596.88	4335.91	3018.08	2996.11	3681.67	3517.83	3070.35	1925.25	3552.21	3043.53	4263.7	2717.88	2833.16	3087.2	3796.77	2919.08	5981.12	9013.42	1649.53
1239	M103T16	103.1	103.1	103.1	16.1056	15.4658	16.4508	89	2	2	3	4	3	4	4	3	3	0	5	2	1	3	3	3	3	4	5		0.00239699	7.18935e-05	37501.3	43498.1	23436.4	51284.7	51469.1	48004.6	60387.5	47710.2	41079.3	14172	63128.5	30812.5	23271.9	35575.8	62764.9	63628.7	39447.9	63028.5	56526.3
1240	M100T10_1	100.1	100	100.1	9.5213	9.26435	9.53023	9	3	0	0	1	0	0	0	1	0	1	0	1	0	0	0	0	0	0	2		0.00240248	7.20255e-05	15686.4	546.401	417.295	6306.39	484.622	551.964	585.218	5607.67	2767.64	1013.32	738.821	4211.38	390.373	423.868	560.392	499.17	534.971	761.83	112707
1241	M30T39	30	30	30	39.3764	38.7417	39.9922	116	1	2	2	0	2	1	2	1	1	0	1	4	1	3	2	1	5	3	0		0.00242224	7.24996e-05	99126.8	154481	89914.4	131443	234341	122355	112506	116953	128717	101242	135918	106890	77770.1	135720	137098	140457	106849	107010	64312.6
1242	M94T10	94.1	94.1	94.1	10.1007	10.0969	10.4066	7	0	0	0	0	0	0	0	0	0	0	0	0	0	0	0	0	5	2	0		0.00242782	7.26331e-05	354.13	124.711	735.99	1319.13	311.032	246.817	1070.59	296.93	248.647	308.523	433.377	213.341	432.284	253.244	316.131	210.968	66489	6424.94	278.43
1243	M99T8	99.1	99.1	99.1	8.34841	7.93575	8.39692	26	1	0	0	3	1	0	0	2	0	0	4	2	2	0	0	1	1	1	5		0.00243093	7.27075e-05	7458.8	2196.04	2502.86	16501.6	4087.57	3148.83	5388.59	10056.7	3489.66	3527.61	23706.3	9071.08	20336	1988.97	6870.99	5920.63	12040.6	6077.8	282288
1244	M85T18	85.1	85.1	85.1	17.5907	17.3979	17.7966	9	0	0	0	4	0	0	0	1	1	0	0	0	0	1	0	0	0	1	1		0.00243545	7.28158e-05	3781.7	3664.39	2461.7	31342	3835.97	2000.53	4505.56	4997.49	4844.04	1265.47	5668.06	1281.53	882.715	3861.83	6297.08	4989.97	3949.37	3815.44	4308.99
1245	M42T9	42.1	42	42.1	9.27332	8.8846	9.72608	15	2	0	0	0	0	0	0	1	1	3	3	1	0	0	0	1	1	0	1		0.00243594	7.28275e-05	18817.5	10039.3	9797.84	15277.5	11129	12068.8	9121.77	28262.3	28018	29375.3	21477	25848.5	14050	7716.34	10336.7	30088.5	23159.6	11611.8	231770
1246	M52T7	52	52	52.1	7.05365	6.9241	7.4808	24	1	1	1	1	2	0	0	2	0	1	3	1	1	2	0	1	4	1	2		0.00243678	7.28475e-05	6343.7	1586.61	6736.4	2800.57	4172.25	4790.42	9538.86	3457.48	2484.88	3335.93	2974.79	3840.37	12380.6	2809.02	6705.55	4543.75	100285	20135.8	6463.75
1247	M85T24	85.1	85.1	85.1	23.8061	23.5134	23.9942	18	1	0	0	1	0	0	0	1	0	0	1	0	0	4	1	0	2	1	5		0.0024897	7.41067e-05	37194.5	20580	19470.6	31524.8	22624.2	19910	18652.1	31123.6	18119.1	10570.7	32959.9	15573.5	9408.99	94332	37119.5	25187.3	24270.3	17671	44850.4
1248	M71T8_2	71.1	71.1	71.1	8.28053	8.0401	8.3965	21	0	0	0	1	0	1	2	0	0	0	5	1	2	0	1	2	2	0	4		0.00250741	7.45257e-05	17670.2	10532.8	12222.5	28704.2	15193.5	19316	33743.1	16859.2	14019.8	9561.14	368932	11136	92943.6	11066.3	59171.4	35934.6	101102	8701.02	125656
1249	M30T8	30.1	30.1	30.1	8.29143	8.0469	8.34648	6	0	0	0	1	0	0	0	0	0	0	0	0	0	0	0	0	0	3	1		0.00251207	7.46358e-05	1011.85	981.858	539.237	6689.7	970.675	1256.38	1092.58	378.58	1031	825.226	2811.52	678.701	323.099	209.001	1014.2	778.135	1215.79	20654.1	12630.3
1250	M231T24	231.1	231.1	231.1	24.314	24.3109	24.3172	2	0	0	0	0	0	0	0	0	0	0	0	0	0	0	0	0	0	2	0		0.00251281	7.46533e-05	1678.55	2472.02	1502.71	2344.76	1547.8	1760.64	1799.26	1736.01	2270.39	1588.5	2381.8	1524.02	1623.62	1490.54	2175.86	1617.14	2593.29	3811.39	1019.93
1251	M102T30	102.1	102.1	102.1	29.9572	29.1832	30.6525	142	2	1	1	2	1	2	2	3	1	2	4	0	1	0	3	2	1	3	5		0.00252572	7.49577e-05	86722.9	216458	90898	98423.9	131031	122468	127538	162023	105123	98916.1	127057	81266	88619.3	94142.6	157590	84844.9	88506.2	77053.8	91330.3
1252	M92T6	92.1	92.1	92.1	5.96393	5.75417	6.5516	53	1	0	1	0	2	1	3	3	1	2	1	1	1	3	2	3	5	2	5		0.00252697	7.49872e-05	86870.4	483.837	172239	8015.3	94399.2	8347.75	66302.8	34600.4	17233.7	23019.3	16109.9	57641.8	43413.8	19805.3	32725.3	100217	2.84279e+06	5084.55	738120
1253	M126T15	126.1	126.1	126.1	15.4945	15.0842	15.541	5	0	0	0	0	0	0	0	0	0	0	2	0	0	0	1	0	0	2	0		0.00252984	7.50548e-05	753.11	420.851	420.61	913.059	880.615	331.199	685.508	527.241	457.057	292.297	9438.78	535.863	377.655	320.906	2348.61	888.961	584.372	8309.31	973.339
1254	M58T7	58.1	58	58.1	7.21824	6.86658	7.62472	6	1	0	0	0	0	0	0	0	0	0	0	0	1	0	0	0	1	0	3		0.00254657	7.54478e-05	34949.7	12075.5	8178.53	12858.5	10663.4	91157.9	17223.6	16453.4	12849.3	13669	17506.8	8974.07	30172.9	11524.3	15113.9	27790.5	137420	57265.1	199881
1255	M29T14	29.1	29.1	29.1	13.8951	13.8864	13.9799	5	0	0	0	4	0	0	0	0	0	0	0	0	0	0	0	0	0	0	0		0.00255112	7.55548e-05	687.813	569.058	391.403	153457	732.713	349.558	1721.22	801.504	1342.72	432.023	2168.56	0	856.89	292.804	5281.6	1559.67	473.227	755.14	2405.77
1256	M44T36	44	44	44	36.2673	35.7907	36.6255	76	3	2	1	0	0	1	1	0	1	2	2	4	1	4	0	1	5	1	0		0.0025522	7.55801e-05	552189	679037	528010	524707	484065	486310	541610	508817	538497	443899	625093	436075	409161	606993	528230	470441	308751	463285	348941
1257	M161T30	161.1	161.1	161.1	30.0143	29.1871	30.3767	41	1	1	1	0	2	1	1	0	0	1	0	1	1	3	0	1	1	1	0		0.00256943	7.59835e-05	68329.5	87765.7	66014.1	75145.1	98208.5	60851.9	76358.6	71662.4	76072.4	62992.1	73884.3	72263.4	60584.4	67204.2	72329	83629	72439.3	53378.7	56161.2
1258	M69T22_2	69.1	69.1	69.1	22.1971	22.1942	22.2708	4	0	0	0	0	0	0	0	1	0	0	0	0	0	2	0	0	1	0	0		0.00258191	7.62751e-05	9242.16	10157.7	7108.99	12918.1	9496.16	7384.66	7282.11	10919.3	8311.85	4106.27	11826.4	5304.54	3565.77	14202.9	14664.8	9630.83	18210.7	13769.8	5698.64
1259	M113T11_2	113.1	113.1	113.1	11.155	11.0642	11.2143	5	0	0	0	0	1	0	0	0	0	0	0	0	0	0	0	0	0	1	3		0.00258212	7.62801e-05	4042.22	2227.41	2147.59	5237.99	4605.66	2003.67	4766.67	4175.78	2622.37	2067.44	6387.25	2332.97	3888.54	2056.62	4794.71	5717.1	5156.5	3366.57	60196.7
1260	M38T14	38	38	38.1	14.4357	13.9032	14.706	13	2	0	0	1	0	0	1	0	0	0	3	1	0	0	0	1	2	0	0		0.00258386	7.63207e-05	2580	956.037	690.696	3112.39	813.642	645.454	2151.39	1518.92	1148.93	1399.98	4188.45	2466.28	465.79	965.537	983.153	6579.15	5414.19	1149.5	6310.52
1261	M69T27	69.1	69.1	69.1	26.724	26.705	26.8232	13	0	0	1	1	0	0	1	1	0	0	3	1	0	2	0	0	3	0	0		0.00258411	7.63264e-05	53654.2	36907	64327.6	57745.6	47150.2	41336.1	60332.4	166020	34047.8	33095.9	105192	38728.7	25875.9	58702.7	50387.1	55531.1	57917.8	43467.1	17949.1
1262	M119T6	119.1	119	119.1	5.96394	5.80475	6.33775	22	1	0	1	0	0	0	1	0	0	0	0	1	1	0	0	1	5	0	4		0.0025916	7.65011e-05	4983.33	909.935	9892.77	1010.81	5147.34	836.013	2126.7	2158.73	1390.68	1395.9	1563.44	3135.41	4579.24	1343.45	1822.01	4396.23	160148	680.382	39229.6
1263	M97T9	97.1	97	97.1	9.04362	8.76863	9.26955	15	0	0	0	0	0	0	0	0	0	0	2	1	0	0	1	0	1	0	5		0.00260292	7.67745e-05	1586.08	770.599	609.976	1323.76	1184.41	1239.84	3131.89	2299.53	925.45	1859.29	5484.82	2514.56	6271.59	832.42	7590.16	1689.02	9964.43	923.844	357890
1264	M111T10_1	111.1	111.1	111.1	9.56697	9.01857	9.9291	59	4	1	2	2	2	2	3	3	2	3	5	3	2	3	2	2	5	3	4		0.00261852	7.71588e-05	42785.6	7178.13	8693.87	10822.6	22211.2	33585.5	35813.5	24716.9	7992.6	11635.5	67829.6	16489.1	25216.7	11157.4	15702.7	24662.5	65138	28681.5	65848.6
1265	M125T8	125.1	125.1	125.1	7.61542	7.24882	7.6222	4	0	0	0	0	0	0	0	0	0	0	0	0	0	0	0	0	1	3	0		0.00262803	7.73926e-05	161.126	116.612	122.705	203.595	129.448	408.308	475.084	139.266	289.847	107.737	260.008	192.251	2126.87	570.589	482.599	610.938	5053.68	36802.9	412.974
1266	M137T13_2	137.1	137.1	137.2	13.1467	13.005	13.3238	14	0	0	1	2	0	0	0	1	1	2	0	1	1	0	0	0	0	3	2		0.00267128	7.84697e-05	202.16	112.244	1027.26	84427.3	270.639	122.035	262.8	1614.14	1381.02	4347.13	713.956	1054.3	2388.33	72.2564	449.825	192.357	1266.39	186780	54663.5
1267	M30T16	30.1	30.1	30.1	15.9512	15.5127	16.1675	5	0	0	0	0	0	0	0	0	0	0	0	0	0	0	0	0	0	4	0		0.00268747	7.88715e-05	342.739	574.57	370.349	611.983	593.162	433.111	549.473	454.116	142.467	216.305	451.616	359.702	472.183	91.8544	832.324	707.749	223.049	24039.6	546.931
1268	M30T19	30	30	30	19.1977	19.1904	19.21	6	0	1	0	0	0	0	0	0	0	0	0	2	0	0	0	1	0	2	0		0.00269849	7.91447e-05	8888.94	10908.1	6564.03	9435.94	9832.49	7372.27	8966.77	8980.13	8499.44	7080.48	8447.81	11116.5	5891.87	8794.38	8152.14	12233.2	7325.69	9154.05	4780.77
1269	M139T8	139.1	139.1	139.1	7.61762	7.6027	7.6732	10	0	0	0	0	0	0	0	0	0	0	0	0	1	1	1	0	3	4	0		0.00271996	7.96758e-05	163.373	150.064	202.698	234.932	185.091	559.024	934.097	78.4896	748.156	119.719	245.221	306.52	3929.45	2703.88	1519.41	2897.89	9323.61	154780	934.652
1270	M161T39	161.1	161.1	161.1	39.2868	38.6769	39.9389	69	2	0	2	0	0	0	1	0	0	2	0	3	2	2	0	0	3	1	0		0.00275338	8.04997e-05	57843.1	88125.6	78254.7	82641.9	75420.8	78475.2	93035.5	77512.3	85230.2	53190	80888.9	70156.7	97832.4	81646.8	81459.3	74498.1	113123	62681.3	57759.7
1271	M151T17	151.1	151.1	151.1	17.2991	17.1238	17.5345	75	1	3	1	4	3	3	4	2	2	0	4	4	1	3	3	3	3	4	4		0.00277641	8.10657e-05	8030.22	13585.3	4457.56	17201.9	13028.4	9791.31	13426.3	10705.9	9834.78	982.319	17767.8	7491.35	3533.08	7461.17	14018.5	13458.2	13051.4	9857.28	10853.6
1272	M230T24	230.1	230.1	230.1	24.3145	24.3084	24.3172	3	0	0	0	0	0	0	0	0	0	0	0	0	0	0	0	0	0	3	0		0.00279034	8.14073e-05	528.289	646.104	501.411	712.598	595.36	642.878	552.75	597.812	524.997	460.414	626.802	429.436	431.674	491.599	684.131	523.355	494.716	25218.8	358.954
1273	M53T13	53	53	53.1	13.0845	12.6642	13.1966	13	0	0	2	4	0	1	0	0	0	1	1	0	0	1	0	0	1	0	1		0.00280797	8.1839e-05	3541.55	775.195	6088.28	654046	15366	1649.75	1647.66	8489.2	7850.8	5473.34	8725.57	8608.37	4426.49	3873.71	5762.83	4014.59	22463.8	3914.81	32027.2
1274	M70T21	70.1	70.1	70.1	21.0219	20.4408	21.0994	33	1	2	0	2	0	0	2	2	1	0	1	3	0	4	0	2	4	4	2		0.00281134	8.19215e-05	15202.7	23115.6	9789.09	21089.1	15280.6	11859.3	31300.2	28637.2	15266.8	10255	24616.3	18771.8	5405.2	36367.9	13540.6	17832.1	31472.7	97116	12373.1
1275	M205T11	205.2	205.2	205.2	11.4509	11.4431	11.7771	5	0	0	0	1	0	0	0	0	0	0	0	0	0	0	0	0	3	0	0		0.00282723	8.23096e-05	28.1499	17.5652	12.5394	1036.62	9.52933	18.0211	12.485	0	21.5828	4.43732	13.2722	6.93229	9.39998	3.4946	53.4527	20.4038	3517.97	18.7244	72.4843
1276	M43T9	43	43	43.1	9.40601	8.63038	10.1119	118	4	2	3	4	3	2	3	3	4	3	5	4	1	4	1	3	5	4	5		0.00284078	8.26398e-05	359836	92582.4	144374	286535	207817	218881	134644	993160	757455	81002.6	615607	762338	68920.2	64771.1	62263.5	87464.5	930279	219635	1.22358e+06
1277	M51T5	51	51	51	5.32131	5.09853	5.7034	70	0	2	3	3	1	2	2	2	3	0	3	0	1	0	1	2	4	0	1		0.00285828	8.30658e-05	43725.3	74125.4	53633.4	48765.4	65527.9	47478.8	48486.8	43560.3	58996.3	41403.4	56937.6	37253.8	39423.7	43098	53226.5	58251.2	72559.1	35807.8	64039.3
1278	M79T13	79.1	79	79.1	13.0937	12.6642	13.4312	27	0	0	0	4	2	0	0	1	4	0	1	2	1	1	2	0	3	1	2		0.00287057	8.33646e-05	4845.09	530.696	26736.2	2.94083e+06	106921	1194.35	1975.13	58370.6	41968.5	3162.95	34862.2	50829.9	12409.5	1228.6	27301.4	10512	88802	5681.48	23747.7
1279	M38T17	38	38	38	17.3816	17.3753	17.387	12	1	1	0	0	0	0	1	0	0	0	4	1	0	0	1	1	2	0	0		0.00288407	8.36921e-05	3394.8	1232.5	659.43	2447.64	2316.79	1083.44	2288.47	1377.12	1064.46	1953.65	7756.23	2915.33	526.515	1051.78	2699.02	8675.59	2843.38	1316.15	2009.36
1280	M71T24	71.1	71.1	71.1	23.8035	23.7958	23.9942	7	1	0	0	0	0	0	0	0	0	0	0	0	0	3	0	0	0	0	2		0.00288438	8.36995e-05	78997.4	77621.3	58078.6	83075.3	68322	61867.5	63679.7	76822.6	65236.5	43209.5	84221.4	49260.2	41775.4	162392	87978.8	73393.9	60821.2	51305.7	70565.6
1281	M39T5	39	39	39	5.28853	5.26637	5.4789	9	1	0	0	0	1	1	0	0	0	0	0	0	2	0	0	0	4	0	0		0.00290145	8.4113e-05	12688.7	5527.45	13567.3	6870.84	18879.7	8409.37	11516.1	8191.04	9038.91	7313.49	7068.96	6965.56	16372.4	6147.87	9964.95	9971.54	76566.1	6897.85	66635.5
1282	M131T19	131.1	131.1	131.1	18.9056	18.603	19.2323	10	0	0	0	3	0	0	0	0	0	0	0	0	0	0	3	0	1	0	0		0.00290521	8.42038e-05	4060.46	4904.5	3993.42	22878.5	4686.32	4512.39	3867.9	4427.87	6091.23	4144.35	5238.62	3511.39	3244.47	3070.91	84401.4	5151.99	7402.07	4086.61	4501.91
1283	M53T23	53	53	53	23.0949	23.0929	23.0969	2	0	0	0	0	0	0	0	0	0	0	0	0	0	0	0	0	0	2	0		0.00293482	8.49188e-05	2239.9	2288.13	2186.37	2723.64	2028.59	2558.48	2466.87	2828.11	2593.52	2115.73	2853.4	2001.28	1695.14	2518.88	2753.02	2806.37	6901.45	7114.24	1323.01
1284	M192T21	192.2	192.2	192.2	20.8061	20.7641	20.9999	4	0	0	0	0	0	0	0	0	0	0	0	0	0	0	0	0	1	3	0		0.00294316	8.51198e-05	35.9294	32.5974	31.3425	123.005	54.765	53.9335	55.9264	50.953	37.3444	35.914	91.863	35.927	11.6247	67.6827	660.19	82.6696	2207.94	11343.1	31.5677
1285	M112T13	112.1	112.1	112.2	12.7697	12.3238	13.4205	25	1	0	0	2	0	1	1	1	1	0	1	1	1	0	1	0	1	2	5		0.00294881	8.52559e-05	2036.47	2614.25	2145.21	16415.1	2242.63	2429.96	2360.94	2106.97	1914.8	1723.66	2930.33	1974.45	2291.47	1612.9	3130.41	3148.95	3122.32	2690.21	1.562e+06
1286	M53T20	53	53	53	19.9641	19.9115	20.2273	4	1	0	0	0	0	0	0	0	0	2	0	0	0	0	0	0	0	1	0		0.00295235	8.53409e-05	2478.86	1308.79	1147.23	2031.62	1519.81	1095.39	1808.57	1555.69	1201.08	2939.96	2440.86	1172.9	2285.77	1529.83	2805.64	1296.83	3544.28	7782.83	1385.19
1287	M85T7	85.1	85.1	85.1	6.85828	6.42385	7.08913	9	0	0	0	0	0	0	0	0	0	0	0	0	1	0	0	0	1	0	5		0.00297466	8.58769e-05	1053.53	1242.1	711.084	1630.53	1813.12	2843.43	7545.92	1736.94	1243.02	1150.37	3035.47	1041.13	23823.9	1044.45	9379.61	4499.95	77120.7	1475.12	484784
1288	M30T12	30.1	30	30.1	11.7134	11.5858	12.1437	10	0	0	0	0	0	0	0	0	0	0	0	0	0	0	0	0	0	2	5		0.00300458	8.65937e-05	529.849	621.902	314.95	933.888	371.234	816.787	493.77	707.984	808.624	748.099	1281.03	432.479	179.304	525.322	689.403	787.778	583.631	7741.14	126088
1289	M112T10	112.1	112.1	112.1	9.6692	9.4222	9.93328	11	1	0	0	0	0	1	1	1	0	0	0	0	0	0	0	0	4	0	1		0.00301717	8.68945e-05	3113.88	387.746	362.917	741.754	384.123	3115.85	3579.38	1850.62	567.599	410.432	2244.2	306.16	3883.38	473.78	2006.95	1607.93	17742.6	522.861	4577.42
1290	M136T17	136.1	136	136.1	17.2991	16.8312	17.6881	91	3	3	3	4	3	4	4	3	4	1	5	4	1	4	3	3	5	4	5		0.00304511	8.75608e-05	19541.7	35244.5	10926.1	39753.5	32358.6	26065.4	34181.9	27948.8	25676.2	1342.89	44356.5	17384.7	8745.6	18431.1	36493.7	36518.3	29145.2	25315	28167
1291	M82T18	82.1	82.1	82.1	18.0094	17.826	18.3401	11	0	0	0	4	1	0	1	0	0	0	0	0	0	2	0	0	1	1	1		0.00304604	8.75829e-05	1191.2	654.637	713.946	53297.7	3527.07	1126.26	4820.74	1280.41	1091.3	709.827	2051.39	962.851	704.454	3090.87	1451.92	1294.53	5688.93	5226.67	3058.58
1292	M80T21	80.1	80.1	80.1	20.8046	20.7641	20.974	5	0	0	0	1	0	0	0	0	0	0	0	0	0	0	0	0	0	4	0		0.00305352	8.77608e-05	451.324	565.28	541.463	2791.21	527.976	457.511	419.989	745.332	609.608	448.293	756.237	735.518	506.571	582.063	853.675	554.087	2349.27	112985	446.19
1293	M79T17	79.1	79.1	79.1	17.299	17.1203	17.701	99	3	2	1	4	3	4	4	3	3	0	5	1	1	2	3	2	4	4	5		0.00305839	8.78767e-05	173232	305492	97058.2	298379	284407	237094	300621	248606	217121	9399.9	374220	144561	77037	160180	327505	318163	236473	231758	202364
1294	M127T22	127.1	127.1	127.1	22.1942	22.1913	22.2225	5	0	0	0	0	0	0	0	0	0	0	0	0	0	3	1	1	0	0	0		0.00306004	8.79159e-05	4133.53	4027.32	3137.97	5239.91	3648.62	3323.84	3374.52	4936.76	3686.58	1562.7	5139.05	2663.02	1596.19	7401.79	6424.19	4758.08	4034.64	2921.21	2493.7
1295	M123T18	123.1	123.1	123.1	17.7742	17.4055	18.3544	32	0	0	0	4	2	0	1	1	1	1	1	0	1	2	0	0	5	3	2		0.00306787	8.81019e-05	1165.27	569.082	627.88	148401	3887.15	499.281	1701.53	1208.85	1181.67	8379.37	5330.46	1110.4	6156.14	4698.32	1452.35	2154.09	15670.7	43929.1	5265.85
1296	M44T39	44	44	44	39.447	38.9509	39.9922	71	2	0	2	0	1	0	0	1	0	1	0	4	2	3	0	1	5	2	0		0.00308016	8.83935e-05	537247	690628	704705	642195	520757	608860	587049	598242	644784	485069	642483	476137	491440	465538	610969	392091	538622	517510	396502
1297	M60T9	60	60	60	9.04288	8.98302	9.08257	5	0	0	0	0	0	0	0	0	0	0	0	1	0	0	0	0	0	0	4		0.00308453	8.84971e-05	2483.65	3200.84	2906.51	3363.22	2868.29	3152.18	3246.3	2898.49	3070.22	2497.67	3354.58	4210.06	2322.16	2522.98	3519.38	2586.39	2469.17	3143.91	250849
1298	M143T20	143.1	143.1	143.1	19.6368	19.6292	19.8778	7	0	0	0	2	0	0	0	0	0	0	2	0	0	1	1	0	1	0	0		0.00309018	8.86308e-05	1409.49	2445.21	1673.51	4822.3	1902.69	1255.23	1895.81	2367.07	3457.26	1134.48	4159.82	2575.86	641.992	3317.53	4545.32	2263.86	3405.88	2259.57	1313.75
1299	M63T20	63	63	63	20.0351	20.0275	20.0426	2	0	0	0	0	0	0	0	0	0	0	0	0	0	0	0	0	0	2	0		0.00309228	8.86806e-05	623.626	744.333	418.879	575.613	559.916	519.549	572.02	554.305	610.955	554.651	951.653	512.936	449.254	466.271	621.9	619.097	606.775	5352.89	597.302
1300	M70T12	70.1	70.1	70.1	11.6932	11.5343	12.0191	71	4	2	3	3	3	1	4	2	3	3	5	3	3	2	1	3	4	2	5		0.0031165	8.92671e-05	44327.7	14529.2	17635.6	38935.1	21593	7430.8	39703.1	25018.4	27197.1	37811.6	32386.3	13578.9	19257.2	10485.1	12326.4	63830.2	34067.1	15334.5	409583
1301	M179T25	179.1	179.1	179.1	24.8062	24.7666	24.8863	37	3	1	3	3	3	0	0	1	1	3	5	2	1	0	1	3	4	2	1		0.00320723	9.14511e-05	17065.6	10272.6	8864.45	13858.2	25644.7	6006.72	9596.11	10111.9	11924.9	9955.73	33489.8	9811.24	6992.52	6702.25	9501.25	20614.7	16400.1	10032.7	5870.7
1302	M70T17	70.1	70.1	70.1	17.1198	17.0072	17.4096	8	0	0	0	3	0	0	1	0	0	0	0	0	0	1	0	1	1	1	0		0.00322027	9.17635e-05	5673.97	2582.82	5077.7	17878.8	7269.63	1983.06	6873.96	4068.83	2224.11	3529.42	8088.24	2426.48	2037.42	5795.91	3110.49	10120.9	5645.15	5240.76	4530.64
1303	M257T20	257.25	257.2	257.3	19.8887	19.8762	20.201	4	0	0	0	0	0	0	2	0	0	0	1	0	0	0	0	0	1	0	0		0.00324487	9.23515e-05	3474.79	5091.54	3335.13	9549.95	2984.86	1841.52	5522.32	4530.31	5327.31	2213.04	5957.28	5048.07	1252.72	16580	4579.45	4773.94	10187.9	5490.48	461.864
1304	M88T34	88.1	88.1	88.1	34.3266	33.4687	35.3445	201	0	2	2	4	2	2	3	2	1	0	4	2	3	2	3	3	0	3	5		0.00324727	9.24089e-05	329342	690444	320573	408147	418275	515260	310727	489811	439608	325478	463321	289858	419423	470244	262816	286641	314490	301061	268972
1305	M43T11_2	43.1	43	43.1	10.544	10.336	10.5586	10	2	0	0	0	0	1	0	0	1	0	2	0	0	0	2	1	0	1	0		0.00326539	9.2841e-05	68520.3	20810.1	16733.5	38910.7	37880.7	30395.4	42007.1	30725	35570.7	3692.49	68341.3	22934.5	20059.6	23475.6	67811.4	58367.3	25014	22134.7	17756.5
1306	M121T17_1	121.1	121.1	121.1	17.2991	16.8266	17.749	94	3	3	2	4	3	3	3	2	2	0	5	3	1	2	3	2	5	3	5		0.00326883	9.29229e-05	28984.5	48201.4	15804.6	90799.8	47375.2	35571.4	48157.6	39844.1	36465.3	2295.04	64697.9	24310	12371.4	25168.1	57335.1	53125.3	46436.6	37850.7	38353.9
1307	M145T35	145.1	145.1	145.1	35.1786	34.3342	35.905	78	1	0	0	4	1	2	2	2	0	2	1	0	0	1	2	1	2	3	2		0.00327315	9.30258e-05	32999.7	43781.7	34916.6	45523.7	38923.8	45931.1	53290.2	35054.8	43603.6	34094.2	50037.7	32486.7	31316.1	37473.9	41258	41894.7	28735.7	28497.9	30596.1
1308	M146T20	146.1	146.1	146.1	20.2848	20.2808	20.2889	2	0	0	0	2	0	0	0	0	0	0	0	0	0	0	0	0	0	0	0		0.00327331	9.30294e-05	352.46	482.173	400.396	5450.58	569.377	422.388	412.099	630.477	546.174	325.542	456.28	474.715	244.565	259.139	628.215	640.005	1180.37	306.312	419.566
1309	M61T15	61	61	61	15.2364	15.2317	15.2437	3	0	0	0	0	0	0	0	0	0	0	0	0	0	0	0	0	0	3	0		0.00327951	9.31771e-05	665.258	731.215	653.182	707.85	1013.22	651.922	693.424	724.848	590.349	709.835	895.485	592.743	420.279	641.928	722.18	1258.41	879.761	39758.2	880.81
1310	M57T14_2	57.1	57.1	57.1	13.8918	13.6858	13.9032	6	0	0	0	4	0	0	0	0	0	0	0	0	1	0	0	0	0	1	0		0.00328146	9.32236e-05	10323.9	6977.74	7495.12	254388	15083.6	7602.9	15996.7	11734.6	10020.3	8019.25	20717.5	9173.87	10211.6	5869.7	25621.4	17731.1	16799.4	10458.5	11913.1
1311	M119T7_2	119.1	119.1	119.1	7.44703	7.43498	7.4623	11	0	0	0	0	0	0	0	0	0	0	0	0	0	0	0	0	5	1	5		0.00330154	9.37007e-05	736.563	993.648	967.388	1306.4	952.519	846.11	5790.08	917.135	710.714	795.435	1157.39	858.749	1650.5	881.971	964.96	1069.29	124295	2331.65	22803
1312	M193T12	193	193	193	11.8573	11.8328	12.2575	69	3	3	4	4	2	4	4	2	4	2	5	4	3	4	3	3	5	4	5		0.00331762	9.40822e-05	14999.1	11835.8	12878.7	11050.7	11152.5	11860.5	12065.6	14526.1	13641.9	11859.6	16232.3	11440.4	13309	11838.7	10781.2	11886.6	18319.2	16229.2	54663.3
1313	M177T35_2	177.1	177.1	177.1	35.2779	34.8755	35.638	70	3	2	3	0	3	0	2	0	0	0	0	3	3	2	0	2	4	3	0		0.00332235	9.41943e-05	270080	334081	273890	280826	291790	260591	266736	255309	292047	234696	276647	240955	268962	215191	259968	288543	200032	121931	175973
1314	M39T20	39	39	39	20.4444	19.9101	21.0203	36	3	0	0	3	1	0	2	1	0	2	3	1	1	2	0	1	5	4	1		0.00333055	9.43885e-05	12971.1	7545.17	4079.25	11913.2	11003	5243.52	13805.7	9538.96	5294.79	10605.7	10369.6	17307.6	3653.35	7648.28	6307.89	41144.2	25778.2	61878.8	12538.6
1315	M149T13_2	149.2	149.1	149.2	13.0867	12.8193	13.1158	7	0	0	0	4	1	0	0	0	0	0	0	0	0	0	0	0	1	0	1		0.00336715	9.52532e-05	125.495	17.6211	393.627	543109	11297.3	88.2866	117.562	1228.68	1637.45	34.7037	2257.31	2047.23	406.968	19.8333	514.162	569.581	7510.54	86.765	1385.43
1316	M72T27	72.1	72.1	72.1	27.1587	26.3275	27.9097	141	2	0	1	0	0	1	3	1	0	1	1	2	1	2	1	0	5	0	1		0.0033801	9.55586e-05	731869	542730	404444	520155	462865	503806	391639	491663	525040	373686	531748	310603	340479	511521	481703	467465	512021	381545	596309
1317	M97T16_2	97.1	97.1	97.1	15.5166	15.4626	15.5417	5	0	0	0	0	0	0	0	0	0	0	2	0	0	0	0	0	0	3	0		0.00338998	9.57911e-05	2907.02	876.836	1629.53	2808.19	4077.3	875.705	4286.55	1702.26	1600.21	1358.84	120534	2428.08	1215.33	1224.57	2687.15	3774.82	3351.77	265582	4215.26
1318	M202T19	202.2	202.2	202.2	18.715	18.7124	18.7176	2	0	0	0	2	0	0	0	0	0	0	0	0	0	0	0	0	0	0	0		0.00339089	9.58126e-05	471.441	75.2679	18.197	15400.2	30.9784	31.0115	47.0147	50.0726	108.611	21.5997	107.008	9.23108	18.7213	43.1674	5823.31	44.0467	386.889	35.4781	34.4262
1319	M126T10	126.1	126	126.1	9.5708	9.11205	10.2759	44	3	0	1	1	2	1	2	2	0	1	5	3	1	1	0	2	4	3	2		0.00340123	9.60557e-05	15754.3	1877.33	3009.8	3424.34	7950.51	12694.9	11344	8709.57	2693.59	3788.2	26241.2	6250.71	7959.6	3556.99	4417.2	7786.61	19503.9	11131.4	23939.8
1320	M120T9	120.1	120.1	120.2	8.72047	7.58418	9.55323	135	2	2	4	4	3	3	4	2	4	0	5	2	1	1	3	3	5	4	5		0.00341917	9.64771e-05	5994.83	10613.4	11834.8	35784.1	13174.9	32338.4	48436.9	8242.88	10288.8	851.639	7536.14	5762.53	98069.4	3255.69	54526.5	15211.3	239384	93467.7	39311.5
1321	M111T24	111.1	111.1	111.1	23.8027	23.7996	23.9942	4	1	0	0	0	0	0	0	0	0	0	0	0	0	2	0	0	0	0	1		0.00343075	9.67488e-05	10427.4	7097.28	5212.64	8347.91	6106.25	5119.47	4567.51	6579.47	5607	2246.44	8885.19	3723.36	1951.65	15524.7	9571.53	6758.63	8169.38	5009.67	8110.78
1322	M114T9	114.1	114.1	114.1	8.93744	8.88218	9.14727	6	0	0	0	0	0	0	0	0	0	0	0	0	0	0	0	0	0	0	5		0.00352116	9.88702e-05	1078.38	325.192	172.872	329.652	257.189	243.734	299.456	289.133	235.764	246.725	435.799	166.747	320.85	281.366	263.735	223.685	370.295	289.838	495358
1323	M183T25	183.2	183.1	183.2	25.3248	25.3005	25.877	9	2	0	0	0	0	0	0	0	0	0	1	0	0	1	0	0	2	2	1		0.00354775	9.94906e-05	3567.79	1046.16	590.092	1349.03	668.343	534.796	569.38	1383.86	630.753	436.313	2167.55	445.429	167.302	3917.24	1322.36	821.699	3585.46	2265.07	3070.74
1324	M167T23	167.1	167.1	167.1	23.0843	23.0786	23.0969	4	0	0	0	0	0	0	0	0	0	0	0	0	0	0	0	0	0	4	0		0.00355457	9.96495e-05	938.995	706.28	678.916	841.75	732.1	668.465	526.902	707.985	622.178	444.46	1311.37	473.593	379.356	495.131	904.305	1169.12	2932.25	194580	652.507
1325	M122T17	122.1	122	122.1	17.3953	17.2935	17.4134	6	0	0	0	3	0	0	0	0	0	0	0	1	0	0	0	0	1	0	0		0.00356012	9.97787e-05	541.669	502.418	452.397	35286.7	1140.96	368.35	696.91	584.296	585.266	367.88	922.844	816.014	352.565	216.855	712.376	474.33	4591.11	867.949	2726.49
1326	M70T15	70.1	70	70.1	14.91	14.3557	15.3052	40	1	0	0	3	1	0	1	0	1	2	5	1	1	3	1	1	3	4	2		0.00357678	0.000100166	18975	3947.54	8898.14	32804.4	21133.5	3183.43	20656.2	11002.2	9526.13	18431.4	40518.4	11889.9	8729.44	13333.4	13846.4	29659.7	30442.9	87480.8	24545.1
1327	M69T6	69.1	69.1	69.1	5.94085	5.3156	6.41638	63	4	0	2	1	3	0	2	3	2	2	3	2	2	3	1	3	5	2	5		0.00359367	0.000100558	231991	3701.34	424235	30015.3	260201	14448.7	56319	105993	55877.5	68271.1	53792.4	153097	96647.3	63191.1	73410.8	109698	6.6008e+06	17589.3	1.76698e+06
1328	M61T11	61	61	61	11.2492	10.9208	11.2521	5	0	0	0	0	0	0	0	1	0	0	0	0	0	0	0	2	0	0	2		0.00362158	0.000101205	1154.82	1612.62	1109.26	1419.56	1409.53	1450.06	1419.19	1758.01	1481.58	1044.46	1890.7	919.774	951.659	1095.42	1749.53	1928.09	1252.94	1358.48	8158.33
1329	M210T24	210.1	210.1	210.1	24.3145	24.3084	24.3172	3	0	0	0	0	0	0	0	0	0	0	0	0	0	0	0	0	0	3	0		0.00367815	0.00010251	1056.62	862.859	918.805	833.329	1020.23	685.435	940.462	767.07	876.482	826.004	975.899	724.178	526.819	772.093	1706.49	1010.11	899.435	42022.1	699.002
1330	M125T22	125.1	125.1	125.1	22.2054	22.1904	22.2747	3	0	0	0	0	0	0	0	0	0	0	0	0	0	2	0	0	1	0	0		0.00369262	0.000102843	2896.07	3036.7	2216.42	4468.21	2940.57	2368.85	2190.62	3336.27	2588.62	1349.39	4153.98	1760.19	1066.77	3987.68	4372.75	3176.75	7259.03	2542.28	4183.77
1331	M99T7	99.1	99	99.1	7.38897	7.19293	7.67353	21	2	0	1	0	0	3	0	0	0	0	2	0	1	0	1	0	2	1	5		0.00369967	0.000103005	4040.44	1606.61	3460.19	1661.91	1122.3	8484.52	1536.25	1447.1	1147.93	910.537	4719.56	722.596	11639.8	923.299	6185.82	1685.46	15279.2	5881.99	378001
1332	M63T21	63	63	63	21.4384	21.4241	21.4496	5	0	0	0	0	0	1	0	2	0	0	0	0	0	0	0	0	0	2	0		0.00370479	0.000103123	590.833	591.093	628.537	2307.84	478.085	1661.95	541.239	3585	609.122	404.139	674.688	390.246	434.876	1200.91	538.357	2339.96	614.801	51295.1	351.487
1333	M126T16	126.1	126.1	126.1	16.1981	15.8299	16.5786	13	2	0	0	0	0	0	1	0	0	0	1	0	0	0	1	0	0	4	2		0.00370862	0.000103211	1976.39	283.55	226.585	329.673	511.248	138.394	1713.42	376.69	262.525	194.916	1304.6	284.689	205.162	169.361	894.41	344.412	329.446	93147.5	4424.4
1334	M152T13	152	152	152.1	12.7698	12.7651	13.2756	34	2	1	0	1	2	3	2	0	0	1	4	3	2	1	2	1	2	2	5		0.0037109	0.000103263	3274.05	4060.31	3854.33	4078.29	4110.45	3842.24	3564.74	3459.57	3161.92	3491.14	4673.2	3214.06	3013.34	3185.78	5383.55	4163.64	4832.16	3247.9	5799.07
1335	M55T6	55.1	55	55.1	5.94287	5.40062	6.5549	30	2	0	1	1	1	0	2	0	0	0	3	0	0	0	2	1	5	0	4		0.00371198	0.000103288	35413.5	3208.61	57486	15139.9	34568.8	9745.79	34968.3	12135.2	6413.41	8523.95	29691.5	18800.7	55655.3	17336.2	62539.4	24214.5	881624	3859.56	225446
1336	M51T18	51	51	51	18.0051	17.8231	18.4447	12	0	0	0	1	0	0	1	0	0	0	1	2	0	0	0	2	1	3	0		0.00372736	0.00010364	6575.59	6104.9	3460.88	10572.5	5850.48	4777.17	7576.61	6709.86	5260.82	5644.58	13424.9	8169.21	3026.83	4374.9	5973.99	16706.7	9566.54	13796.7	7941.25
1337	M119T17_1	119.1	119.1	119.1	16.5784	15.9539	16.9102	21	1	0	0	0	1	0	1	0	1	0	4	1	0	0	1	0	3	3	1		0.00373057	0.000103714	3742.51	1408.25	1410.53	5402.92	6646.07	1062.66	6361.02	1619.39	2354.1	2506.35	15591.1	4321.81	796.564	1124.75	9060.25	2868.2	10109.3	56989.6	2271.26
1338	M102T6	102.1	102.1	102.1	6.20795	5.946	6.25015	9	0	0	0	0	0	0	0	0	0	0	0	0	0	0	0	0	5	0	1		0.00373946	0.000103917	1693.24	2188.9	2769.6	1889.51	1991.36	1937.33	5891.57	2004.02	2139.86	1343.37	2000.42	1214.29	8025.33	1245.84	4489.77	1970.15	38703.5	1793.55	7406.35
1339	M67T6	67.1	67	67.1	5.93928	5.26637	6.24633	28	1	0	1	0	1	0	2	1	1	0	1	1	0	0	1	1	5	0	5		0.00374176	0.00010397	64777.4	895.464	120523	6199.76	72237.8	1513.1	12684.5	25733.2	14064.1	13925	13124.2	41000.7	5715.73	11566.3	16617.4	28462.5	1.94156e+06	2738.4	501299
1340	M106T18	106.1	106.1	106.1	18.0018	17.9857	18.0132	19	2	0	0	2	0	0	1	1	1	1	1	2	0	0	0	2	4	1	1		0.00378211	0.000104892	17247.8	2878.78	1289	26273.4	8763.21	1182.79	22556.7	7430.42	3692.69	12948.5	13966.3	28555	563.5	3959.89	3439.51	82563.6	38517.9	8208.38	30902
1341	M126T11	126.1	126.1	126.1	10.8913	10.3041	11.3289	16	0	0	0	0	0	0	0	1	0	0	0	1	0	0	0	0	2	0	5		0.00378413	0.000104938	238.344	206.944	174.526	276.436	210.944	202.162	261.533	973.308	210.506	92.3027	333.512	652.574	325.416	96.9749	377.78	279.079	2106.47	99.3732	517505
1342	M178T16	178.1	178.1	178.2	16.1133	15.1629	16.2108	19	1	0	0	0	0	1	1	1	1	0	2	0	0	0	1	2	3	4	1		0.00379376	0.000105157	2024.7	2692.52	754.009	2449.74	2754.89	2091.38	2965.71	2540.93	1899.56	343.693	5432.48	1350.27	844.256	1478.83	3113.61	3299.54	2605.74	10537.5	2324.08
1343	M214T23	214.1	214.1	214.1	23.0894	23.0786	23.1005	3	0	0	0	0	0	0	0	0	0	0	0	0	0	0	0	0	0	3	0		0.00379601	0.000105208	201.077	308.271	236.977	316.725	235.44	266.858	291.962	291.233	335.577	285.087	366.95	262.268	215.638	318.553	298.657	321.657	1055.65	12124.3	131.694
1344	M66T21	66.1	66.1	66.1	20.8061	20.8046	20.8076	2	0	0	0	0	0	0	0	0	0	0	0	0	0	0	0	0	0	2	0		0.0038115	0.00010556	272.177	210.632	124.133	350.931	173.369	188.771	202.203	263.27	189.786	213.232	294.562	131.079	184.735	196.285	130.691	162.949	627.766	13060.7	428.827
1345	M137T6	137.1	137.1	137.2	5.97537	5.92133	6.62785	19	0	0	1	0	0	0	1	2	0	0	0	2	0	2	0	0	5	2	1		0.00383968	0.0001062	7754.57	67.1999	16227.3	1015.49	8792.57	81.9952	4478.4	3902.57	1298.14	2438.25	1490.57	4685.73	523.945	1899.83	1771.71	12145.8	511822	1415.07	65961.6
1346	M109T6	109.1	109.1	109.1	5.96393	5.93337	6.23887	13	0	0	1	0	0	0	0	0	0	0	0	1	0	0	0	1	5	0	2		0.00384895	0.00010641	1899.41	489.592	3606.29	650.003	1986.69	481.97	809.478	920.161	643.098	593.891	1327.53	1220.61	1960.18	581.873	1051.55	1602.03	63638.8	406.288	14340.6
1347	M161T37	161.1	161.1	161.1	36.78	36.3549	37.4491	46	0	0	1	0	0	0	0	0	0	1	1	3	3	3	0	0	3	0	0		0.00384971	0.000106427	83458.2	107854	96977.4	100765	88134.3	93238	89267.8	93769.3	100431	94496.8	104748	89282.4	97150.5	79171.1	97039.3	88565.8	89893.3	75949.8	72432.9
1348	M110T8_2	110.1	110.1	110.1	7.61045	7.4623	7.62038	3	0	0	0	0	0	0	0	0	0	0	0	0	0	0	0	0	1	2	0		0.00385735	0.0001066	215.523	263.13	192.145	267.138	269.37	290.97	613.334	196.821	225.586	136.405	251.429	118.855	1606.9	192.494	543.026	396.532	4365.16	7141.46	259.259
1349	M56T12	56.1	56.1	56.1	11.6155	11.1438	12.0191	48	3	0	2	3	0	1	1	2	2	1	3	1	1	1	0	3	1	1	5		0.00387991	0.000107138	25557.8	4841.51	12467.2	20378.4	10635.3	5979.4	9375.66	15290	21267.5	7104.65	23339.9	6734.78	26742.9	6447.32	8834.89	49149.3	10993.3	40432.5	507854
1350	M79T23	79.1	79	79.1	23.0932	22.8729	23.3079	6	0	0	0	0	0	0	0	0	0	0	0	0	0	1	0	0	1	3	0		0.00391959	0.000108081	2243	2286.81	1532.11	2639.43	2114.61	1779.79	1984.52	2347.12	2466.58	1510.51	3534.93	1919.22	1238.96	3217.98	2619	2238.49	29745.7	110166	2087.9
1351	M137T21_2	137.1	137.1	137.1	21.3486	21.3413	21.5541	3	0	0	0	0	0	0	0	0	0	0	0	0	0	0	0	0	3	0	0		0.00396172	0.000109079	460.155	473.463	391.763	795.461	495.19	393.79	356.795	471.536	392.641	396.602	712.105	326.293	256.638	449.497	577.947	572.973	9736.13	709.538	492.569
1352	M215T19	215.2	215.2	215.2	18.9288	18.9195	18.9381	2	0	0	0	0	0	0	0	0	0	0	0	0	0	0	2	0	0	0	0		0.00396216	0.00010909	11.2336	4.21086	13.7544	28.745	41.0879	2.84323	22.6467	4.3444	322.222	0	48.4891	18.1287	0	3.29912	31287.8	42.9055	7.05851	0	5.35939
1353	M222T21	222.2	222.1	222.2	20.8081	20.7641	21.3271	5	1	0	0	0	0	0	0	0	1	0	0	0	0	0	0	0	0	3	0		0.00396793	0.000109226	357.306	197.817	78.1736	69.2957	56.5191	63.3068	64.093	38.7789	523.556	72.2712	177.274	24.359	28.8416	78.1264	78.636	96.8361	74.988	11326.1	34.1704
1354	M152T16	152.1	152.1	152.2	15.9893	15.5343	16.2717	21	2	0	0	0	0	0	1	1	0	0	4	1	0	1	0	1	4	2	1		0.00401271	0.000110284	5314.85	386.36	555.307	1164.93	2460.85	396.504	3038.01	1854.42	613.085	1299.86	192274	3616.77	464.352	1747.98	810.201	2841.53	9098.53	10778.4	4127.99
1355	M51T17	51	51	51	17.2991	17.1236	17.5345	64	2	1	1	2	3	2	3	2	2	1	2	1	1	2	2	2	3	3	4		0.00402224	0.000110509	16384.4	19964.8	10679.1	19838	21103.8	17604.3	22464.3	19244.7	18404.8	5529.8	26802.6	12177.7	7077.65	14030.6	19803.9	23949.5	17749.2	20530.8	15548.4
1356	M95T6	95.1	95.1	95.1	5.94105	5.74168	6.4608	29	1	0	1	0	1	0	1	1	1	1	2	1	0	0	1	1	5	0	5		0.0041223	0.000112858	16378.3	743.743	32768.9	1529.73	17555.1	753.7	3498.71	6805.16	3458.33	4719.09	3873.77	10673.3	3057.7	2889.7	4819.62	10520.6	547055	1046.63	141121
1357	M71T17	71.1	71.1	71.1	17.4077	17.0083	17.6005	6	0	0	0	3	0	0	0	0	0	0	0	0	0	1	0	0	1	1	0		0.00413084	0.000113058	6124.77	6274.47	5083.93	63798.6	8034.03	5513.76	6707.74	7371.25	6815.18	5116.2	10643.5	5256.55	4315.37	15318.1	6883.76	9305.67	11489.4	7939.42	8437.53
1358	M175T28	175.1	175.1	175.1	28.1118	27.7879	28.4055	174	4	3	2	4	3	3	4	3	4	2	5	3	1	2	3	3	5	4	0		0.00414236	0.000113327	93703.1	115980	133549	90918.5	100331	93647.7	134032	188100	122486	121229	144481	46956.4	83093.5	118740	58851	124913	117116	43628.1	92513.2
1359	M181T24	181.1	181.1	181.1	24.3159	24.3145	24.3172	2	0	0	0	0	0	0	0	0	0	0	0	0	0	0	0	0	0	2	0		0.0041536	0.00011359	778.217	789.485	674.9	889.547	785.646	724.916	558.417	651.979	672.971	536.901	910.872	483.952	374.53	608.22	906.072	728.699	927.177	10118.7	501.689
1360	M116T6	116.1	116	116.1	5.96775	5.94085	6.24268	11	0	0	1	0	0	0	0	0	0	0	0	0	0	0	0	0	5	0	2		0.0041553	0.000113629	1292.4	1277.67	2328.7	1190.84	1572.51	884.658	1058.95	1133.6	1121.71	1009.99	1169.36	1316.27	985.013	857.423	1220.26	1579.36	36627.6	661.102	8256.97
1361	M92T24	92.1	92.1	92.1	24.3114	24.3071	24.3172	4	0	0	0	0	0	0	0	0	0	0	0	0	0	0	0	0	0	4	0		0.00416111	0.000113765	745.966	802.281	566.018	658.781	761.743	727.965	480.517	574.101	669.396	543.977	877.2	512.016	323.473	676.678	830.221	614.941	8802.11	747944	479.685
1362	M43T19	43	43	43	18.5931	17.8676	19.2283	24	0	0	1	3	1	0	0	0	0	0	0	0	1	1	2	0	2	4	1		0.0042179	0.000115088	42856.9	44282.5	47033.9	89247.7	51291	42256.7	43126.6	47914	43424.7	39570.5	47890.7	37162.4	42903.8	47233.1	71689.2	45982.2	59178.7	267884	38190.8
1363	M39T19	39	39	39	18.7649	18.4185	19.2207	13	0	0	0	0	0	0	1	0	0	0	0	1	0	2	2	0	1	4	1		0.00422706	0.000115301	4412.22	4227.91	3645.96	6697.14	4543.44	3397.08	6392.58	4422.37	4224.24	3586.9	5738.44	5536.04	3150	7810.78	21655.3	5082.37	7459.16	66721.6	9419.18
1364	M62T23	62	62	62	23.084	23.0786	23.0894	2	0	0	0	0	0	0	0	0	0	0	0	0	0	0	0	0	0	2	0		0.00423346	0.000115449	741.559	647.925	636.06	862.975	805.255	709.923	703.181	690.158	702.934	613.928	836.013	510.884	485.731	582.92	672.002	669.484	664.162	7918	387.2
1365	M142T11	142.1	142.1	142.1	11.0847	11.061	11.1516	4	0	0	0	0	0	0	0	0	0	0	0	0	0	0	0	0	0	0	4		0.00425766	0.00011601	221.062	120.02	110.337	213.931	141.49	87.2242	173.882	427.138	115.813	99.6819	366.648	185.887	262.252	84.1528	211.115	195.949	182.71	252.48	41903.2
1366	M135T18	135.1	135.1	135.1	18.0044	17.9857	18.716	32	1	0	0	3	2	0	1	1	0	1	1	2	0	0	3	2	4	2	3		0.00426636	0.000116212	17677	6301.07	2161.45	40394.9	10133.2	3429.44	22534.8	10302.1	5344.82	12463.1	16182.5	27847.5	1324.57	4981.81	12115.4	75097.4	39836.7	7518.2	32723.5
1367	M81T27	81.1	81.1	81.1	26.7279	26.5029	26.8232	25	2	0	1	2	2	1	2	1	0	0	4	0	0	3	1	1	3	0	2		0.00431366	0.000117306	21907.2	11659.1	26370.4	24060.2	19298.2	15919	26176.6	91006.5	7993.64	8631.99	49497.4	13847.3	8190.59	25805.5	21716.1	21551	31815	14532.4	9009.88
1368	M99T9	99.1	99.1	99.1	9.12457	8.88218	9.71743	14	1	0	0	0	0	1	2	0	0	0	0	0	1	0	0	0	1	0	4		0.0043156	0.000117351	4620.85	2888.3	2538.65	4258.5	2826.56	3806.53	6853.79	3625.8	2777.54	3025.13	8277.71	2975.89	8741.46	2500.07	6831.43	5420.1	10224.5	3198.75	174178
1369	M71T29	71.1	71.1	71.1	28.9126	28.4667	29.2214	15	1	0	1	2	1	0	0	2	0	2	2	0	0	2	0	0	0	0	1		0.00432178	0.000117493	231077	224236	254207	282415	281202	213807	212224	294873	208777	273895	297925	197413	164070	278337	227126	244851	206509	170227	191871
1370	M93T10_1	93.1	93.1	93.1	9.57067	9.53138	9.58595	29	4	0	0	0	2	1	2	1	0	0	5	0	1	0	0	2	4	3	4		0.0043303	0.00011769	31023.4	2343.3	5594.35	4858.78	16336.5	23717	22086.6	16411.5	3646.73	6247.57	52504.4	10096.2	6180.56	8035.95	5924.88	13588.8	40193.6	23747.1	41546.1
1371	M222T19	222.15	222.1	222.2	18.6452	18.4909	19.0623	6	0	1	0	1	0	0	0	0	0	0	0	0	0	0	2	0	1	1	0		0.00436066	0.000118389	33.5455	1119.57	38.4847	768.348	34.1093	42.957	52.2531	77.1355	358.008	19.5532	122.789	0	3.88378	23.9679	12893.6	19.4894	427.482	262.929	12.3155
1372	M110T21	110.1	110	110.1	21.0164	20.6118	21.5541	13	0	0	0	1	0	0	1	0	0	0	0	0	0	1	0	0	4	3	1		0.00439637	0.00011921	1926.55	2956.59	1558.7	6368.08	2073.28	1335.84	3783.4	3599.48	1833.72	1106.33	4084.46	2179.49	696.362	4887.86	1966.28	2132.84	12820.4	31601.4	1897.94
1373	M45T38	45	45	45	38.1077	37.7579	38.6281	47	0	0	0	0	0	0	0	0	0	0	0	2	0	2	0	0	5	0	4		0.00439865	0.000119262	2.85539e+06	3.35912e+06	3.00287e+06	2.98406e+06	2.94629e+06	3.13185e+06	3.07802e+06	3.00419e+06	3.26484e+06	2.80542e+06	3.05441e+06	2.34696e+06	2.60049e+06	3.83036e+06	2.84054e+06	2.90604e+06	2.86733e+06	2.54494e+06	2.53015e+06
1374	M139T14	139.1	139.1	139.1	14.2811	14.0061	14.6752	11	0	0	0	0	0	1	0	0	0	0	1	0	0	1	0	0	1	4	1		0.00439936	0.000119278	309.813	61.4246	166.668	239.056	323.289	629.041	303.834	157.166	115.336	170.309	1122.06	162.517	128.906	667.191	406.204	324.72	3307.48	25457.9	3362.49
1375	M165T17	165.1	165.1	165.1	16.9178	16.9158	17.3886	6	1	0	0	0	0	0	0	0	0	0	0	1	0	0	0	0	3	0	0		0.00447305	0.000121045	1616.45	298.831	338.473	1290.31	621.08	331.694	422.673	887.27	543.5	295.471	1019.03	1309.16	322.76	279.424	513.05	571.618	2224	494.883	342.884
1376	M81T6	81.1	81.1	81.1	5.94618	5.56385	6.33775	30	1	0	1	0	2	0	2	1	1	0	1	1	1	0	1	2	5	0	5		0.00447815	0.000121167	19275.3	550.179	38587	2196.21	20793.2	1061.7	9176.47	8232.8	4258.61	4552.62	6657.09	12965.3	10394.9	2507.65	6470.91	14259.7	615725	1296	159893
1377	M65T20	65	65	65	20.1873	19.7195	20.2963	5	0	0	0	2	1	0	0	0	0	0	0	0	0	0	2	0	0	0	0		0.00455357	0.000122968	1467.56	799.705	865.737	4581.37	2512.71	723.283	1156.99	1160.64	950.949	1165.14	1292.03	827.25	545.448	866.873	2874.66	2739.74	1831.24	2027.46	898.626
1378	M65T6	65	65	65.1	6.20795	5.91063	6.64258	27	0	0	2	0	0	0	1	0	1	1	1	1	1	0	0	0	5	2	3		0.00456594	0.000123263	2977.46	539.982	10227.6	775.535	5086.22	4504.99	17924.4	1176.93	7455.53	5000.45	3748.08	2785.74	26199.2	4213.58	9619.22	11511.7	928217	4747.81	182458
1379	M93T20	93.1	93	93.1	20.1283	19.6288	20.407	14	1	0	1	3	0	0	0	0	0	0	0	0	0	0	2	0	2	2	0		0.0045753	0.000123486	6004.13	978.234	2947.65	32490.3	3603.91	905.208	2308.21	2004.43	1617.11	2297.32	5196.99	2135.9	861.484	1171.08	12419.2	1762.46	19131.7	9584.3	1075.41
1380	M39T17	39	39	39	17.309	16.912	18.0102	50	2	1	3	3	1	2	2	0	1	1	2	2	1	2	1	2	3	3	4		0.00459464	0.000123946	19306.6	16562.5	7791.01	47242.6	18132.8	12616.9	21543.6	18903.7	13628.3	11873.1	35566.6	17396	7079.34	11309.3	18583.3	42711.2	25679.4	14766.1	18216.3
1381	M142T9	142.1	142.1	142.1	9.09982	8.88218	9.7219	12	0	0	0	0	0	0	0	0	0	0	0	2	0	0	0	0	0	0	5		0.00461501	0.00012443	128.691	214.173	54.6808	227.18	128.016	102.104	191.875	112.603	152.791	125.51	311.495	4291.24	266.207	82.7727	194.541	212.3	244.016	179.365	239113
1382	M73T36_2	73.1	73.1	73.1	35.5453	35.2988	35.7792	131	4	3	4	3	2	2	2	3	2	3	2	4	3	4	1	2	5	2	1		0.00464527	0.000125148	696281	1.2361e+06	1.24732e+06	917304	756986	996810	934398	1.15694e+06	1.51895e+06	1.38313e+06	1.96314e+06	785418	917489	1.01198e+06	1.01721e+06	1.38285e+06	469994	762100	744773
1383	M138T21	138.1	138.1	138.1	20.8129	20.7641	21.0204	8	0	0	0	1	0	0	0	0	0	0	0	0	0	0	0	0	2	4	0		0.00465216	0.000125312	454.967	483.935	329.045	1262.89	364.553	277.339	373.128	452.788	297.402	720.821	618.744	756.614	601.962	350.908	485.848	234.159	2838.78	79637.2	386.332
1384	M121T13	121.1	121	121.1	12.823	12.7232	13.4177	59	1	1	2	4	2	1	1	3	4	1	1	2	2	0	3	2	5	2	3		0.00474291	0.000127503	1374.73	3536.95	14701.4	28521.9	25629.3	2101.88	2544.05	11888.3	11645.2	2709.91	2765.64	15370.4	7271.25	314.445	21238.7	5891.12	41628.7	4276.2	8676.11
1385	M103T6	103.1	103.1	103.1	5.99581	5.92195	6.46445	22	1	0	1	0	0	1	1	0	0	0	0	0	1	0	1	1	5	0	3		0.00479822	0.000128835	29174.8	26071.8	34166.1	27058.4	29384.5	32360.7	32481.7	27467	24041.3	24669	27251.1	24451.8	91125.2	23446.5	57021	34119.4	212108	21168.4	80620.1
1386	M130T9	130.1	130.1	130.1	9.0394	8.99242	9.05705	3	0	0	0	0	0	0	0	0	0	0	0	0	0	0	0	0	0	0	3		0.00483478	0.000129713	102.218	240.213	131.188	228.502	174.599	159.79	180.343	218.582	146.252	120.285	206.698	125.335	115.783	117.947	185.515	193.206	141.633	158.457	87629.9
1387	M181T20_2	181.1	181.1	181.1	20.494	20.4899	20.7861	7	0	0	1	0	0	0	0	0	0	0	2	0	1	0	1	2	0	0	0		0.00487578	0.000130697	2154.69	535.44	1381.07	1039.08	1903.95	390.417	3425.01	986.022	360.038	2484.27	2454.45	2020.53	394.007	889.782	2356.15	3734.74	2622.23	1564.47	198.438
1388	M161T17	161.1	161.1	161.1	16.586	16.5784	17.0124	13	1	0	0	2	1	0	1	0	0	0	4	1	0	0	0	0	2	1	0		0.00501384	0.000133996	3292.16	1142.51	1311.76	5775.4	4679.04	749.567	5817.21	1231.1	990.585	2795.11	12842.2	4101.95	1117.73	1311.86	4667.79	2100.96	8496.89	2779.67	1505.83
1389	M72T28	72.1	72.1	72.1	28.2643	27.9212	28.5274	61	2	0	1	0	0	1	3	1	0	1	1	2	1	2	1	0	5	0	1		0.00501619	0.000134052	457328	430543	576272	420450	364158	338063	350312	438676	411106	403968	422262	314058	283884	315524	461876	369186	368762	300791	310532
1390	M136T11	136.1	136.1	136.1	11.4542	11.3048	11.7858	15	2	0	0	3	0	0	0	0	0	0	0	0	0	0	1	0	5	0	1		0.00501815	0.000134099	3953.95	49.5998	293.659	8281.47	38.5862	93.4601	140.667	84.6433	340.058	184.337	139.293	51.9741	374.763	46.0072	786.868	119.496	18612.2	155.007	1636.8
1391	M81T17_1	81.1	81.1	81.1	17.011	16.9178	17.0124	7	0	0	0	3	0	0	0	0	0	0	0	0	0	3	0	0	1	0	0		0.00502101	0.000134167	2197.54	723.131	1524.96	44038.8	2210.76	888.314	2030.1	1913.37	1281.59	1352.14	4048.08	1887.56	846.59	24354.9	1564.56	2623.43	5657.25	5380.55	1351.79
1392	M123T7	123.1	123.1	123.1	7.45279	6.93615	7.61882	6	0	0	0	0	0	0	0	0	0	0	0	0	0	0	0	0	5	0	0		0.00502497	0.000134261	69.0296	120.473	142.685	184.604	114.187	267.033	800.798	106.947	167.71	125.074	191.443	111.482	1097.36	103.653	381.433	329.274	15863.3	172.667	1611.47
1393	M206T20	206.2	206.2	206.2	20.327	20.3168	20.4235	48	2	3	3	3	2	3	4	2	3	2	5	2	1	1	2	2	2	2	4		0.00508945	0.000135794	6705.26	8619.14	12090.4	12650.8	12941.1	7941.49	12373	9782.11	10124.1	6709.71	17217.3	11964.7	3726.07	6884.32	12994.7	18715.6	7723.58	7256.33	7913.48
1394	M64T6	64.1	64	64.1	6.0753	5.94105	6.24268	10	0	0	0	0	0	0	0	0	0	0	0	0	1	0	0	0	4	0	1		0.00510295	0.000136114	725.465	0	1503.61	122.133	854.925	0	641.621	228.492	117.684	228.141	231.219	327.987	6532.13	147.983	460.732	1624.96	48992.4	34.8168	12347.2
1395	M94T17	94.1	94	94.1	17.3905	17.3756	17.701	14	1	1	1	4	0	0	0	0	0	0	1	2	0	1	0	0	0	2	1		0.00513578	0.000136893	47348.7	13106.3	6590.2	97712.6	27275	10951.3	23325.4	22697.8	10108.2	34727.7	171888	57460.5	2027.36	14040.3	52769.7	168472	44720.3	13262.1	76576.1
1396	M138T17_2	138.1	138.1	138.1	16.9087	16.9083	16.9093	3	0	0	0	2	1	0	0	0	0	0	0	0	0	0	0	0	0	0	0		0.00516148	0.000137502	525.425	100.385	216.089	7930.41	3755.82	104.819	430.635	975.68	631.122	223.736	1241.54	270.028	456.295	312.254	361.869	498.251	527.44	279.891	1676.87
1397	M88T31	88.1	88.1	88.1	30.9046	30.3205	31.3489	86	0	2	1	4	2	1	1	2	1	0	2	1	1	0	1	1	0	2	5		0.00522379	0.000138975	235506	346483	254286	219235	210473	381417	226787	248993	325766	234376	304269	214589	194577	238402	291638	314619	220921	295211	361072
1398	M67T20	67.1	67	67.1	19.9648	19.7358	20.0197	4	0	0	0	0	0	0	0	0	0	0	1	0	1	0	0	0	0	2	0		0.00522546	0.000139014	1617.83	1330.81	1330.38	2759.23	1166.3	748.758	1745.25	1480.79	1476.09	3742.66	4684.18	1281.31	3117.9	1525.85	4991.42	1914	6979.79	31195.7	3162.71
1399	M61T12	61	61	61	12.0513	11.6792	12.1553	22	2	1	1	0	1	0	0	1	0	0	5	0	0	0	2	1	1	3	1		0.00530185	0.000140814	5849.15	3777.99	2010.58	1919.24	2008.58	935.371	2078.79	4322.08	1350.4	931.078	12563.4	766.875	1151.17	667.327	8698.01	9305.84	1095.87	6816.87	5412.46
1400	M113T21	113.1	113.1	113.1	21.3304	21.0164	21.3473	13	1	0	1	2	0	0	1	0	1	0	0	0	0	1	0	0	4	1	0		0.00536754	0.000142358	5297.4	6331.56	5187.33	9756.05	5677.23	5986.58	6224.82	5784.96	6367.17	2243.84	7124.71	3999.67	2289.74	5994.73	9984.28	6503.92	7486.57	4456.48	2643.89
1401	M71T22	71.1	71.1	71.1	22.1954	22.1806	22.2956	15	1	0	1	2	0	0	0	1	0	0	0	0	0	3	1	0	2	1	3		0.00539489	0.000142999	43989.8	43133	37741	58857.5	44001.6	42583.4	39753.2	61035.9	42514.4	19814.8	54609.3	31876.7	18220.5	67344.9	64155.5	49397.4	37976.4	32340.5	35272
1402	M184T26	184.1	184.1	184.1	25.5154	25.5116	25.5193	3	0	0	0	0	0	0	0	0	0	0	0	0	0	0	0	0	0	3	0		0.00542979	0.000143816	1369.2	1574.62	1006.49	1590.19	988.847	1140.3	1255.58	1196.83	1221.17	1077.83	1397.74	1008.03	807.748	1114.45	1355.07	1236.45	1167.69	7294.28	839.096
1403	M54T16_1	54.1	54	54.1	15.5036	15.2272	15.8299	8	0	0	0	0	0	0	0	0	0	0	2	0	0	0	0	0	0	4	0		0.00547437	0.000144858	510.105	322.032	225.238	556.437	380.071	226.422	281.188	376.11	354.533	305.689	21344.9	263.638	269.001	289.064	528.19	318.76	587.104	58322.3	792.894
1404	M145T36	145.1	145.1	145.1	36.2043	35.9435	36.3969	26	0	1	0	1	1	0	1	1	1	1	1	0	0	1	1	0	0	0	4		0.00548716	0.000145157	33966.6	30974.5	35013.8	38062.2	34711.7	37633	36681.3	36514.3	41127.9	34137.4	51844.5	30389.9	29567.9	35446	34848.8	35190.8	32852.8	29682.1	36730
1405	M66T6	66.1	66.1	66.1	5.96394	5.9158	6.24268	14	0	0	1	0	0	0	0	0	0	0	0	0	0	0	0	0	5	0	3		0.00555736	0.000146793	7547.42	245.107	16498.5	674.574	7980.52	193.795	999.363	1994.71	1117.48	1225.01	1153.58	4741.26	1109.14	743.067	2027.72	5364.76	273322	350.135	70528
1406	M44T34	44	44	44	34.0482	33.564	34.582	94	4	1	2	0	0	1	1	0	1	2	0	4	2	3	0	0	5	1	0		0.00556141	0.000146887	583118	524246	523792	391234	345343	399073	401969	367516	500226	384709	385131	502283	319037	352002	366856	363160	376232	312549	246787
1407	M107T6	107.1	107.1	107.1	5.96775	5.75137	6.6315	57	1	0	2	1	2	1	3	3	2	2	2	2	1	2	2	3	5	1	5		0.00562028	0.000148255	43518	508.607	89081.3	4084.6	47777.4	8033.21	14801.6	16370.2	10375.4	11116.7	8148.86	28229.6	18451.8	9413.49	24749.2	27543.9	1.53176e+06	2488.78	377736
1408	M147T39	147.1	147.1	147.1	38.9684	38.3871	39.5766	216	0	1	1	4	2	1	3	2	4	0	4	3	1	2	2	2	0	1	3		0.0056831	0.000149711	100908	88178.3	96165.7	166643	137278	174011	213340	133537	108204	97728.4	132159	51698.1	65560.8	109693	121786	129605	94042.7	89860	128921
1409	M44T29	44	44	44	29.3567	28.2072	30.7959	258	3	2	4	0	2	4	0	3	3	1	1	4	3	4	1	1	5	2	1		0.00573101	0.000150819	348354	511572	704269	472911	544037	700315	428456	484013	509459	371367	612283	409291	287201	533436	533165	406073	357881	383405	306041
1410	M147T33	147.1	147.1	147.1	33.1712	31.9971	34.2389	342	0	1	1	3	2	1	1	2	3	0	4	2	1	2	2	2	0	1	5		0.00573733	0.000150965	143755	184047	142299	252738	116719	152573	154996	180843	152183	142283	193632	97718.3	104684	108405	90147	190388	137876	170701	209138
1411	M97T24	97.1	97.1	97.1	23.8041	23.7958	23.9942	6	1	0	0	0	0	0	0	0	0	0	0	0	0	2	0	0	0	0	2		0.00576567	0.000151619	11976.6	10449.7	7307.72	12088.6	7691.31	7746.86	7047.35	9714.66	8470.14	2794.46	13208.8	5486.97	3141.97	23497.2	14828.7	11249	13604.4	7296.79	11024.6
1412	M152T23	152.1	152.1	152.1	23.095	23.0786	23.3041	4	0	0	0	0	0	0	0	0	0	0	0	0	0	0	0	0	1	3	0		0.00578166	0.000151988	940.789	880.281	474.859	1009.89	661.186	673.376	655.175	772.163	1090.95	795.2	1156.33	675.696	537.366	631.712	991.465	1055.13	3262.47	20085.2	995.893
1413	M56T15	56.1	56.1	56.1	14.9122	14.4243	15.0974	18	0	0	0	2	1	0	1	0	0	0	3	0	0	0	1	1	3	3	0		0.00579441	0.000152282	12416.6	2687.39	6179.58	32493.7	14611.7	2142.3	16858.2	6118.99	6296.04	11444.2	27381.3	6774.58	4709.76	8194.67	9656.16	18795.4	20091.1	73545.2	5371.02
1414	M52T6	52.05	52	52.1	5.96775	5.92577	6.55045	12	0	0	1	0	0	0	0	2	1	0	0	0	0	1	0	1	4	0	1		0.00579836	0.000152373	9325.21	615.8	15138	1425.78	10277.2	619.758	7673.57	4449.72	1393.15	2675.97	2190.74	6368.46	10267.6	2454.06	7372.59	10390.1	274907	697.296	52206.8
1415	M70T23	70.1	70.1	70.1	22.7588	22.7501	22.8729	5	1	0	0	0	0	0	0	0	0	0	1	0	0	0	0	0	1	2	0		0.00587371	0.000154105	20454.6	20919.3	14275.7	19065.5	18233.3	16645.4	18129.5	22620	13998.6	9573.25	26707.8	11255.1	9855.14	18731.7	19492.9	15065.1	18473.3	42913.9	11280.5
1416	M207T38	207.1	207.1	207.1	37.8133	36.9139	38.5298	28	0	0	0	0	0	0	0	0	0	0	0	0	0	0	0	0	0	0	5		0.00588417	0.000154346	15321.4	19821.8	16772.5	18553.5	15021.4	15345.2	15708	17597.8	19719.4	15256.2	17560.4	13861.3	13611.3	13833.1	16963.4	15607.2	15542.9	14666.6	28951.8
1417	M114T12	114.1	114.1	114.1	11.6932	11.4289	12.1893	7	0	0	0	0	0	0	0	0	0	0	0	0	0	0	0	0	0	1	5		0.00589112	0.000154505	407.344	317.409	270.206	431.617	359.311	368.508	373.361	573.523	321.523	493.783	539.883	304.182	343.7	309.05	510.21	535.884	336.232	1397.92	37937.8
1418	M96T6	96.1	96.1	96.1	5.9487	5.93337	6.2682	9	0	0	1	0	0	0	0	0	0	0	0	0	0	0	0	0	5	0	2		0.00590523	0.000154829	2041.94	391.299	3301.74	562.299	1697.38	474.435	2083.33	1004.36	587.3	521.383	734.388	1095.06	5995.64	575.196	2602.46	970.997	54972	396.386	13941.1
1419	M61T18	61	61	61	18.4261	18.4185	18.4447	4	0	0	0	0	0	0	0	0	0	0	0	0	0	0	0	0	0	4	0		0.00592548	0.000155293	963.988	881.891	726	841.35	836.534	794.891	789.29	993.815	825.986	746.403	1001.69	763.979	689.688	1925.46	928.449	820.67	716.781	93430.6	922.173
1420	M53T6	53	53	53.1	6.00593	5.92515	6.51378	20	1	0	1	0	1	0	0	0	0	0	1	1	2	2	1	0	4	1	1		0.00594001	0.000155625	30095.4	2341.44	38933.6	6673.6	10033.3	3494.4	13015.8	15205.1	10184.6	10813.4	9371.41	23644.2	24124.3	7608.6	18693.4	31422.1	909153	4187	224353
1421	M68T20	68	68	68.1	20.4439	20.423	20.4554	10	0	0	0	0	0	0	0	0	1	1	2	2	0	0	1	0	2	1	0		0.00597721	0.000156477	13041	4607.78	2093.38	5952.66	5508.48	2779.51	10466.2	5520.34	3168.15	9091.94	8496.06	19853.7	1318.76	4709.95	4351.3	37483.8	20000.5	6769.79	12035.4
1422	M177T27_2	177.1	177.1	177.1	26.5544	25.6718	27.2006	80	1	0	2	1	2	1	0	1	0	1	1	1	2	3	1	0	4	1	0		0.00599953	0.000156987	130030	156196	129742	148065	208682	143228	136239	198298	151316	122887	166578	139581	138453	144509	193238	132747	150818	145312	81197.8
1423	M146T17_1	146.1	146	146.1	16.5785	16.5746	16.9891	10	1	0	0	0	2	0	1	0	0	0	3	1	0	0	0	0	2	0	0		0.00601328	0.0001573	1402.57	421.869	443.163	1618.05	1572.57	243.287	2552.14	374.146	312.079	1095.98	7468.31	1868.67	206.067	334.687	1674.04	592.504	3739.22	503.54	386.552
1424	M76T23	76.1	76.1	76.1	22.9885	22.8764	23.1005	2	0	0	0	0	0	0	0	0	0	0	0	0	0	0	0	0	0	2	0		0.00613401	0.000160049	1343.58	1853.07	1314.97	1777.74	1398.77	1388.38	1386.8	1705.26	1750.62	1121.02	1868	1170.76	865.788	1003.62	1607.69	1821.2	1482.15	23903.4	1175.01
1425	M222T25	222.2	222.2	222.2	24.8025	24.3691	24.8864	54	4	2	3	4	3	1	2	1	3	3	5	4	1	1	2	3	5	2	5		0.00618718	0.000161255	50266.3	23377.7	19322.1	39957.1	82829.9	8133.39	24644.2	17552.9	35974.4	20381.3	109755	25859.3	14205.5	9234.73	20879.6	64034	40992.4	21040.3	27358.9
1426	M80T23	80.1	80.1	80.1	22.8602	22.847	22.8729	3	0	0	0	0	0	0	0	0	0	0	0	0	0	0	0	0	0	3	0		0.00620028	0.000161551	1242.17	1765.11	1550.22	1544.68	1145.1	1205.84	1023.7	1196.61	1360.06	1166.12	1525.27	792.155	874.676	1200.99	1406.58	1805.84	5057.21	166733	772.895
1427	M196T23	196.1	196.1	196.1	23.0894	23.0786	23.0969	3	0	0	0	0	0	0	0	0	0	0	0	0	0	0	0	0	0	3	0		0.00620989	0.000161769	615.173	660.777	431.099	821.356	660.234	628.102	606.474	560.77	637.834	309.377	688.577	359.106	378.087	508.305	687.233	561.039	499.968	5822.08	377.847
1428	M154T13	154.1	154.1	154.1	12.6702	11.8975	13.1738	11	0	0	0	0	0	0	0	0	0	0	0	0	0	1	0	0	0	0	5		0.00621428	0.000161869	128.551	64.5996	35.9931	99.8039	190.055	92.6653	115.754	49.8353	112.107	59.6894	259.581	86.6267	168.61	198.711	190.653	157.818	116.102	63.4332	657228
1429	M127T9	127.1	127.1	127.1	9.03592	8.88218	9.3062	7	0	0	0	0	0	0	1	0	0	0	0	0	0	0	0	0	0	0	5		0.00622514	0.000162114	776.157	1139.28	620.369	991.7	635.989	705.959	1657.9	640.283	790.442	591.665	1099.23	651.926	901.933	529.699	1247.24	1023.31	1925.54	694.419	69288.2
1430	M102T38	102.1	102.1	102.1	38.063	37.475	38.5816	160	1	1	2	3	3	1	4	3	4	2	5	1	2	1	2	2	2	1	5		0.00623493	0.000162336	102439	119651	85784.9	115454	163091	94812.8	144020	187779	108573	111153	158720	71032.6	51081.6	110002	118352	89660.8	99407.2	68869	100878
1431	M61T7_1	61	61	61	6.93233	6.85828	7.08962	9	0	0	0	0	0	0	0	1	0	0	1	1	0	0	0	0	2	0	4		0.00624177	0.00016249	733.439	977.463	898.058	987.841	795.871	850.543	1537.59	1848.94	1072.12	767.565	1252.01	1845.07	3354.06	646.006	1671.31	855.013	3170.76	1435.59	154825
1432	M177T21	177.1	177.1	177.2	20.9032	20.7641	20.9408	55	2	2	4	2	3	3	4	2	1	2	4	3	2	3	2	2	5	3	5		0.00635634	0.000165077	19341	17629	18649.4	26425.8	24977.4	16674.1	25271.6	15323.8	15051.9	13994.6	17124.8	15356.7	12809.6	18287.4	17554.3	22106.1	24277.6	15652.3	16520.1
1433	M60T20_2	60	60	60	20.4409	20.4407	20.4484	7	1	0	0	0	0	0	0	0	0	1	0	0	0	0	0	2	3	0	0		0.0064327	0.000166794	7392.26	5996.27	4904.59	5342.28	5102.58	4925.68	6168.89	5590.16	5026.89	6598.25	6343.4	7501.74	4203.49	5880.57	5319.69	14889.7	9991.58	4504.49	6027.78
1434	M170T20	170.1	170.1	170.1	20.4445	20.4409	20.4467	10	2	1	0	0	0	0	0	0	0	0	0	1	0	0	0	2	3	0	1		0.00648919	0.000168061	1827.87	1022.07	218.941	601.598	666.959	339.731	1799.08	557.168	360.007	1044.83	958.665	2764.95	92.2517	438.355	594.265	7523.25	3656.38	359.188	2884.14
1435	M207T18	207.2	207.2	207.2	18.018	18.017	18.1455	3	0	0	0	2	0	0	0	0	0	0	0	0	0	0	0	0	1	0	0		0.00649287	0.000168143	58.6601	50.0447	84.7726	49585.8	57.7132	33.8385	49.7443	108.89	113.691	59.9092	107.089	18.7441	0	57.1219	52.1191	41.0973	3089.83	1481.01	0
1436	M146T16	146.1	146.1	146.1	16.1285	16.0833	16.1662	4	0	0	0	0	0	0	1	0	0	0	0	0	0	0	2	0	0	0	1		0.00660163	0.000170573	199.503	203.166	149.22	454.066	268.738	312.053	2584.49	307.258	319.674	251.437	471.18	408.299	127.495	182.68	35721.2	337.918	398.193	1895	3578.78
1437	M82T16_2	82.1	82.1	82.1	15.5006	15.4626	15.541	7	0	0	0	0	0	0	0	0	0	0	3	0	0	0	0	0	1	3	0		0.00661064	0.000170774	1745.6	663.945	1236.06	1864.85	1489.8	615.764	2020.46	1771.94	1243.2	4640.58	171571	3517.04	1508.43	728.213	1127.21	1572.05	5141.4	69208.7	3560.97
1438	M72T33	72.1	72.1	72.1	33.2971	32.6948	33.8157	165	2	0	3	0	0	1	3	1	0	1	2	2	1	2	1	1	5	1	1		0.00667934	0.000172303	316587	461767	203196	437237	389878	432236	504654	490414	448879	306436	459868	355439	551267	503935	321561	497281	447347	302940	303640
1439	M143T12	143.1	143.1	143.1	11.6932	11.5858	11.7473	3	0	0	0	0	0	0	0	0	0	0	0	0	0	0	0	0	0	0	3		0.00669734	0.000172703	257.757	174.127	253.549	368.462	218.262	266.309	192.859	257.037	278.502	226.802	317.688	165.806	139.619	173.212	320.072	257.187	415.029	194.617	13484.1
1440	M68T6	68.1	68.1	68.1	5.94488	5.27385	6.24268	21	1	0	1	0	1	0	0	0	1	0	0	2	0	0	0	1	5	0	4		0.00670692	0.000172915	17588.5	750.444	34420	1930.86	19946.8	622.992	2932.29	6412.3	3772.81	4564.97	4004.78	12382.5	3060.64	3853.45	4946.82	7494.72	541614	1352.06	141531
1441	M118T6	118.1	118.1	118.1	6.21047	5.94488	6.23887	8	0	0	0	0	0	0	0	0	0	0	0	0	0	0	0	0	5	0	0		0.00671909	0.000173185	457.071	664.486	658.542	697.1	681.236	748.433	717.943	635.646	636.559	578.809	813.642	596.742	548.907	751.241	749.802	836.067	21143.3	511.613	1586.68
1442	M101T29	101.1	101.1	101.1	29.0149	28.3562	29.6026	218	3	3	3	4	1	3	4	3	4	2	5	3	2	1	3	3	2	4	4		0.00674857	0.000173839	228024	361777	288856	436225	229730	219362	282680	301614	344953	237175	291993	229726	139660	219867	238113	429456	215150	245116	144305
1443	M96T19	96.1	96.1	96.1	18.9053	18.4299	19.1996	10	0	0	1	3	0	0	0	0	0	0	0	0	0	0	0	0	3	2	1		0.00681671	0.000175347	2454.71	1269.89	2299.61	21505	1434.19	767.708	1674.45	2038.64	1084.04	1119.42	2418.62	1161.28	1807.53	1472.4	4031.1	1402.03	9696.03	10309.6	19148.3
1444	M165T13	165	165	165.1	12.7702	12.7651	12.8192	28	3	1	1	1	2	0	0	1	1	2	3	3	1	2	1	2	3	1	0		0.00682246	0.000175474	3730.76	4080.82	4131.3	4058.45	4359.72	3095.51	3069.73	3401.44	3312.44	3482.43	4589.34	3493.56	3148.74	3389.31	5621.87	4696.77	3218.09	3268.64	4887.15
1445	M139T18	139.1	139	139.1	18.4447	18.017	19.2321	7	0	0	0	1	0	0	0	0	0	0	0	0	0	1	0	0	1	2	0		0.0068349	0.000175748	372.069	318.105	342.78	3624.9	1363.42	264.859	326.12	296.239	352.855	273.667	725.718	270.26	209.943	830.625	452.751	514.603	1476.55	10303.6	307.152
1446	M125T20	125.1	125.1	125.1	19.7157	19.516	19.9753	3	0	0	0	0	0	0	0	0	0	0	0	0	0	0	2	0	0	0	0		0.0068519	0.000176124	1207.67	745.824	978.621	1491.11	1425.89	826.943	924.972	1249.02	913.188	834.494	1764.43	999.665	609.361	888.818	3521.08	1615.47	1257.23	1227.89	2868.8
1447	M113T9	113.1	113.1	113.1	9.01857	8.82105	9.1556	13	2	0	0	0	1	0	0	0	0	0	1	0	1	0	0	0	1	0	4		0.00687977	0.000176738	3768.17	2008.91	1570.6	2765.6	2638.77	2376.21	4083.24	2167.52	1990.32	1925.28	4747.65	2764.56	5444.93	1712.97	4488.42	4170.6	6624.6	2803.87	182611
1448	M131T28	131.1	131.1	131.1	28.1786	27.5018	28.7598	202	1	2	4	2	3	2	2	0	0	0	3	2	1	3	1	1	4	2	0		0.00693995	0.000178063	160144	251835	133811	247921	123194	195745	160999	193403	205526	168477	217924	126703	160373	274798	251720	217324	196056	153788	178748
1449	M70T29	70.1	70.1	70.1	28.9125	28.4667	29.0117	11	1	0	1	1	1	0	0	1	0	1	2	0	0	2	0	0	0	0	1		0.00694829	0.000178246	121333	96821.2	145485	148946	172352	98131	106827	178945	93123.7	177860	179772	106962	75558.4	181592	115464	149782	113399	85228.4	95479.8
1450	M150T17	150.1	150.1	150.1	17.2924	16.5746	17.3086	133	4	3	4	4	3	4	4	3	4	2	5	4	2	4	3	3	5	4	3		0.00694845	0.00017825	67811.6	123522	39073.8	101531	111127	90763.9	117230	97505.9	88656.9	5568.99	152411	60041.3	31372.4	66726.7	130549	124282	94528.3	83551.5	96418.6
1451	M43T20	43	43	43.1	20.4445	19.9753	21.5541	16	2	0	0	0	0	0	0	0	0	0	1	2	0	0	1	1	5	1	1		0.00699645	0.000179303	72435.1	68408.4	54284.4	66879.6	56165.7	56606.7	75984.4	64525.2	57342.4	60536.4	73121.4	78094.6	43973.6	59581.5	87451.8	123422	113673	89484	55886.2
1452	M94T19	94	94	94.1	18.7582	18.4299	19.2321	20	3	1	2	2	0	1	1	0	0	0	1	1	0	0	1	0	2	2	2		0.00700605	0.000179514	14452.8	4957.69	5904.35	11628.1	13483.8	3145.57	13562	6663.98	2054.28	8446.21	8420.59	8465.94	2511.16	56923.3	10868.6	16045.1	20163.3	19644.2	21900
1453	M114T10_2	114.1	114.1	114.1	9.5301	9.51243	9.71743	4	0	0	0	0	0	0	0	0	0	3	0	0	0	0	0	0	0	0	1		0.00703213	0.000180085	425.228	356.044	289.865	287.664	222.474	260.684	375.728	347.304	345.856	331142	383.632	254.518	310.311	204.295	310.943	320.949	597.737	220.722	28981.2
1454	M45T37_2	45	45	45	37.4794	37.2662	37.6855	28	0	0	1	0	0	0	0	0	0	0	0	3	1	1	0	0	5	0	4		0.00706282	0.000180757	2.9717e+06	3.39347e+06	3.14446e+06	3.02166e+06	3.11515e+06	3.23181e+06	3.24606e+06	2.98872e+06	3.28767e+06	2.94829e+06	3.30033e+06	1.954e+06	2.43575e+06	3.2026e+06	3.16554e+06	3.19763e+06	2.67846e+06	2.72473e+06	3.80019e+06
1455	M128T10	128.1	128.1	128.1	10.2958	10.2647	10.5384	7	0	0	0	0	0	0	0	0	0	0	1	0	0	0	0	0	0	0	5		0.00713122	0.000182251	359.684	290.123	199.716	224.38	244.487	238.73	249.476	259.187	212.757	192.83	1400.43	125.408	235.675	202.948	307.237	282.495	265.079	178.757	146711
1456	M169T22	169.2	169.2	169.2	22.1942	22.1844	22.204	4	1	0	0	0	0	0	0	1	0	0	0	0	0	2	0	0	0	0	0		0.00718018	0.000183318	1272.38	654.113	774.426	1928.89	838.573	672.477	838.947	2033.45	512.833	217.036	1245.21	570.647	270.438	2851.21	1717.49	1013.13	1033.33	609.138	571.878
1457	M206T15	206.2	206.2	206.2	14.5692	14.4319	14.7096	4	0	0	0	2	0	0	0	0	0	0	0	0	0	0	0	0	2	0	0		0.00719858	0.000183718	7.2509	0	3.66171	4109.95	28.8661	0	30.0826	51.5231	24.7919	18.4573	44.3936	16.1231	17.9129	0	1028.4	32.0185	2737.25	46.4362	25.6627
1458	M83T23	83.1	83	83.1	22.7626	22.1829	22.8454	43	2	3	1	2	1	1	2	3	0	0	4	3	0	4	2	0	4	2	5		0.0072034	0.000183823	29192.4	32314.4	13290.6	27219.7	20101.6	16144.2	20035.1	27840.3	15257.9	9094.18	40305.5	18218	8437.14	23074.2	25267.9	18561.3	29240.3	20464.8	19415.2
1459	M136T27	136.1	136.1	136.1	26.726	26.7012	26.8232	14	1	0	1	1	0	0	2	1	0	0	3	0	0	2	0	0	3	0	0		0.00720421	0.00018384	7690.09	5190.03	8785.37	7871.63	6828.23	5970.08	9624.82	23385.3	5095.37	4944.84	14679.8	5413.25	4528.2	8207.4	7978.21	7379.65	10179.9	5035.48	2820.25
1460	M107T5	107.1	107.1	107.1	5.27193	5.25903	5.2968	8	0	0	1	0	1	0	0	0	1	0	0	0	0	0	0	1	4	0	0		0.00723171	0.000184438	18832.8	568.348	33097.2	2969.94	43220.4	1750.42	14904.9	8395.96	11953.7	5803.29	2704	7724.31	10092	4644.58	3612.24	13432.2	184959	7446.67	56627.1
1461	M143T18	143.1	143.1	143.1	17.7921	17.4445	17.8023	20	0	0	1	2	2	1	0	1	0	0	2	1	0	1	1	2	1	1	3		0.00725436	0.00018493	4472.71	3391.26	6116.59	7531.04	7754.78	4154.97	5990.88	5675.7	5410.69	1591.43	10531.7	3495.77	2116.29	6606.56	8752.81	8416.35	5802.89	4136.69	8298.71
1462	M93T5	93.1	93.1	93.1	5.27193	5.2427	5.29965	12	1	0	1	0	1	0	1	1	2	0	0	0	0	0	0	0	5	0	0		0.00729397	0.000185789	62131	437.319	106005	9171.9	136579	5133.51	51010.5	29077.3	36303.4	20821.4	7286.03	26355.5	31053.5	16436.1	12098.6	39527.1	592086	21249.9	181363
1463	M97T23	97.1	97.1	97.1	22.7707	22.1942	23.3079	55	2	3	1	3	3	1	3	3	1	0	5	4	1	4	3	2	4	2	5		0.00734192	0.000186826	22282.2	26524.4	11200.4	22543.7	16127.3	13945	17172.6	23932	13209.2	6342.7	36443.8	14448.7	5996.64	20852.1	20507.3	18023.6	25668	18591.9	15763
1464	M110T18	110.1	110	110.1	17.9704	17.8367	18.1379	5	0	0	0	2	0	0	0	0	0	0	1	1	0	0	0	0	1	0	0		0.00739099	0.000187886	1214.99	1223.38	879.393	12988.9	1428.64	609.881	1392.21	1211.85	828.293	1180.52	2657.49	1652.49	421.719	681.367	1203.96	2298.44	5464.48	2824.82	1500.35
1465	M108T10	108.1	108.1	108.1	9.57073	8.74003	10.1119	99	4	1	3	4	3	2	4	3	3	3	5	3	2	4	2	3	5	4	5		0.00743279	0.000188788	112261	10145.3	70501	29568.7	72956.9	83730.7	81171.4	61304.1	17521.2	28875	174953	41558.9	22944.2	99761.1	23001.5	47041.1	150530	74179.3	160277
1466	M60T5	60	60	60	5.40027	5.3313	5.41913	10	1	0	1	0	1	0	2	1	0	1	0	1	0	1	0	1	0	0	0		0.00746379	0.000189455	20194.5	5984.23	21066.8	9287	22109.1	4917.27	10879.8	12391.3	6283.95	9945.33	6356.05	5804.89	4452.93	6426.5	5950.74	10323.4	5388.52	3907.47	165720
1467	M71T11_1	71.1	71.1	71.1	10.5521	10.1358	10.8174	74	4	3	3	4	3	4	4	3	3	0	5	4	2	4	3	3	5	4	5		0.00750112	0.000190258	48081.4	33076.2	29131.2	58545.1	51826.2	43085.4	60894.2	46731.3	42089.9	9429.97	83380.9	45313.6	39273.7	41270.5	78708.4	65141.5	53157.2	32963.7	184631
1468	M139T11	139.1	139.1	139.1	11.3248	11.0959	11.3319	6	0	0	0	0	0	0	0	0	0	0	1	0	0	0	0	0	5	0	0		0.00750154	0.000190267	471.925	153.367	400.24	281.026	221.305	129.341	311.858	236.997	153.98	176.6	2854.19	143.11	348.688	174.763	453.553	486.577	23068.2	390.651	1248.75
1469	M164T15	164.1	164.1	164.1	15.1692	15.1606	15.5086	6	0	0	0	0	0	0	0	0	0	0	0	0	0	0	0	0	0	0	5		0.00751331	0.000190519	51.3665	31.4549	26.5263	97.5611	63.1275	15.7489	97.6579	33.5266	27.6218	31.6747	126.826	164.929	35.9516	2.89515	199.185	152.778	205.654	69.1931	54729.6
1470	M30T33	30	30	30	32.5537	32.1495	32.9692	95	4	1	3	1	1	0	2	1	2	2	2	3	2	3	0	2	4	1	0		0.00758291	0.000192012	102603	140316	93076.5	114541	86439.3	78486.7	84652.8	116507	157996	92197	102395	89215.5	73006.3	108152	88127.8	71894.6	50855.7	64043.8	45193.5
1471	M183T24	183.2	183.2	183.2	23.8035	23.7958	23.8075	3	1	0	0	0	0	0	0	0	0	0	0	0	0	2	0	0	0	0	0		0.00764664	0.000193375	2027.61	397.973	706.441	1043.17	549.823	393.466	438.828	1273.05	455.856	142.756	1118.61	356.699	137.19	6769.14	1226.51	651.497	834.342	492.644	1847.08
1472	M95T19	95.1	95	95.1	18.906	18.3439	19.2323	26	0	0	1	3	1	1	1	1	0	0	0	0	0	1	2	0	3	4	3		0.00766271	0.000193718	5777.49	1299.76	7939.57	15332.3	8159.28	3351.05	23364.8	6870.88	2350.55	2334.24	7408.68	3780.84	4341.57	6186.65	28156.3	4883.93	23679.9	108574	115831
1473	M62T6	62	62	62	6.18237	5.93455	6.4608	11	0	0	0	0	0	1	1	0	0	0	0	0	1	0	1	0	3	0	1		0.00768989	0.000194297	308.97	153.634	482.832	106.357	570.871	1972.16	4896.97	147.755	710.544	87.448	206.464	117.643	9676.37	339.253	3408.13	722.437	37654	240.188	6029.59
1474	M121T5	121.1	121.1	121.1	5.27003	5.2394	5.30478	21	1	0	2	2	3	1	1	1	3	0	1	1	0	0	0	0	5	0	0		0.0077002	0.000194517	46778.2	1219.46	83371.2	9497.02	108444	6503.07	40196.7	22947.5	30909.3	17025.1	7216.33	20938	24702	13536.9	10988.1	31818.2	448650	17320.1	158398
1475	M112T9	112.1	112.1	112.1	9.12383	8.80088	9.1556	8	3	0	0	0	0	0	0	0	0	0	0	0	2	0	0	1	1	0	0		0.00775801	0.000195748	5683.03	627.397	620.918	1274.54	906.948	1211.38	2438.26	1387.87	839.636	756.627	3504.36	871.629	4798.9	698.236	2310.1	1991.57	5224.91	590.174	3389.17
1476	M153T15	153.1	153.1	153.2	15.2437	15.2317	15.5417	5	0	0	0	0	0	0	0	0	0	0	2	0	0	0	0	0	0	3	0		0.00784409	0.000197575	307.441	361.583	349.877	443.015	569.931	291.487	470.415	361.639	401.273	283.258	64858.7	330.398	344.444	259.371	560.305	701.77	1689.08	371532	884.047
1477	M147T36	147.1	147.1	147.1	36.4769	35.7983	37.1174	239	0	1	1	3	2	1	1	2	4	0	4	3	1	2	2	2	0	1	5		0.00785749	0.000197858	106687	173265	114946	146119	134777	128336	111828	114718	182743	106389	105054	60241.9	101675	142633	138010	87140.5	109384	97601.2	108785
1478	M169T24	169.2	169.2	169.2	23.8073	23.7996	23.8075	3	1	0	0	0	0	0	0	0	0	0	0	0	0	2	0	0	0	0	0		0.00786994	0.000198122	2091.41	656.033	663.207	1259.13	635.753	647.042	437.332	1080.27	496.236	136.956	1443.13	415.607	266.89	8407.65	1120.22	807.228	1204.04	382.705	2807.17
1479	M143T9	143.1	143.1	143.1	9.14362	8.88327	9.60067	7	0	0	0	0	0	0	0	0	0	0	1	0	0	0	0	0	0	0	4		0.00789896	0.000198736	296.652	665.114	370.283	380.166	422.93	394.833	409.109	335.146	401.471	337.189	1208.2	432.331	318.421	364.252	440.201	356.766	289.434	312.544	24431.4
1480	M191T13	191.2	191.2	191.2	13.0867	12.8115	13.1123	7	0	0	0	4	0	0	0	0	0	0	0	0	0	0	0	0	3	0	0		0.00791126	0.000198995	51.0697	44.5223	74.0127	18233	186.911	64.4329	72.1733	97.7501	122.72	55.7089	173.095	100.928	78.5167	12.2666	174.579	102.367	5189.48	47.7411	27.38
1481	M100T10_2	100.1	100.1	100.1	10.1471	9.98317	10.5543	8	0	0	0	1	0	1	0	0	0	0	0	0	0	0	0	0	0	2	2		0.00796829	0.000200199	583.002	315.206	428.784	6856.99	861.828	2883.1	520.096	2041.14	656.334	392.223	1615.03	515.608	976.475	302.707	557.914	380.541	694.361	9285.69	91581.9
1482	M147T35	147.1	147.1	147.1	35.0433	34.2464	35.7845	265	0	1	1	3	2	1	1	2	3	0	4	3	1	2	2	2	0	1	5		0.00800192	0.000200907	113536	228586	109767	141134	133286	134485	111687	113894	211306	113381	112120	89586.4	108220	143596	83633.3	125368	109894	97068.6	177309
1483	M111T15	111.1	111.1	111.1	14.9124	14.2554	15.2503	28	1	0	0	2	1	0	1	0	0	2	3	2	0	2	1	2	2	4	1		0.00807668	0.000202479	9261.22	2514.34	5444.57	8980.91	12226.4	2355.26	11584.6	5116.43	5151.67	84545.3	21846.2	7304.68	3033.12	6899.05	9623.53	14974.9	14775.9	15792.9	6144.54
1484	M221T14	221.1	221.1	221.1	13.9578	13.4547	13.9934	15	2	0	2	0	2	1	0	0	1	2	0	0	0	0	1	2	0	0	0		0.00810812	0.000203138	3292.48	2298.03	3638.35	1587.01	7230.06	2806.35	3008.79	815.273	2533.51	3456.6	1464.63	3246.97	2302.93	3341.33	1309.57	4813.91	3042	2254.68	238.278
1485	M54T20	54.1	54.1	54.1	20.4439	20.4404	20.8046	11	1	0	0	0	0	0	1	0	0	1	1	1	0	0	0	2	0	3	1		0.00812854	0.000203566	89408.4	30495.4	2294.24	24874.7	35053.7	7786.43	102973	41109.2	8061.41	69647.1	47774.2	144843	654.184	15213.3	9607.89	398767	168844	29163.5	129441
1486	M114T14	114.1	114.1	114.1	14.1911	14.1755	14.5466	4	0	0	0	0	0	0	0	0	0	0	1	0	0	0	0	0	0	2	1		0.00816135	0.000204253	356.149	384.145	223.573	517.293	572.188	256.463	343.504	409.396	368.872	246.701	2205.39	245.508	258.053	257.241	341.735	458.33	248.088	24487.1	12016.1
1487	M138T18	138.1	138	138.1	17.9666	17.9645	17.975	5	0	0	0	2	0	0	0	0	0	0	0	0	0	0	0	0	1	1	1		0.00816226	0.000204272	2383.1	3612	1547.79	24196.9	3365.59	1133.43	3406.44	2249.65	1067.05	2677.27	3177.36	2570.73	660.016	1000.43	1537.87	4267.77	7045.9	22916.5	3942.47
1488	M41T6	41	41	41.1	6.02422	5.90922	6.54498	26	1	1	0	0	1	0	1	0	1	1	0	2	1	1	0	1	5	2	2		0.00816326	0.000204293	80677.4	30760.7	115817	42759.6	86342.2	31909.3	56946.3	86622.5	57598	59309.5	56995.5	90610.5	53489.3	76182.2	63661.2	121418	4.08658e+06	38998.7	781700
1489	M139T21	139.1	139.1	139.1	20.8076	20.4862	21.0162	7	0	0	0	0	0	0	1	0	0	0	1	0	0	1	0	0	1	3	0		0.00817753	0.000204591	473.315	536.617	493.321	792.741	706.517	446.681	2111.39	573.834	477.873	425.229	1434.3	495.789	365.799	1028.51	817.791	687.111	3682.28	31819.2	651.076
1490	M121T23	121.1	121.1	121.1	22.7924	22.2708	23.3079	81	3	2	2	4	3	3	3	3	2	0	5	2	0	1	3	3	2	4	4		0.00824732	0.000206064	19998.4	26167.2	14447.2	29163	26639.9	23631.4	28882.6	24225.4	23814.4	8291.14	31986.9	16247.6	9819.42	16560.8	33297.4	28198	45897	172360	22517.4
1491	M85T22	85.1	85.1	85.1	22.204	22.1775	22.3051	39	2	1	2	3	2	2	1	2	1	0	3	2	0	4	3	3	2	1	5		0.00824833	0.000206086	20641.6	21118.6	18288.2	31512.3	24138.4	19136.8	19355.8	36227.1	20404.3	7020.03	27795	14761.4	5380.07	42030.4	37095.7	23072.4	20295.1	16019.5	23420.3
1492	M102T13	102.1	102.1	102.1	13.1	13.0867	13.1123	4	0	0	0	4	0	0	0	0	0	0	0	0	0	0	0	0	0	0	0		0.00831813	0.000207582	765.645	1194.9	878.162	22009.1	1196.12	689.054	1066.15	1155.71	1017.18	769.24	1284.94	815.706	938.964	890.199	1124.88	941.789	984.377	840.241	1396.12
1493	M91T6	91.1	91	91.1	6.18682	5.2968	6.56678	84	3	0	2	3	3	1	4	2	2	2	2	1	1	3	2	3	5	3	5		0.00833331	0.000207907	71790.2	2205.89	126793	56278	91582.7	120944	684041	104119	91646.6	51772.8	39612.7	29398.6	1.07625e+06	47100.9	332632	406666	9.66455e+06	45134.8	526252
1494	M111T29	111.1	111.1	111.1	28.9106	28.4701	28.9697	10	1	0	1	0	1	0	0	1	0	1	2	0	0	2	0	0	0	0	1		0.00836625	0.000208612	12608.6	12808.5	13260	12056.6	15728.8	8950.4	8238.02	15172.9	7566.16	17201.6	18879.3	8971.04	5306.48	18457.3	12536.1	12494.9	11872.7	8130.77	8541.2
1495	M98T21	98.1	98.1	98.1	21.0252	20.4445	21.1031	33	3	2	0	2	2	0	2	3	0	1	2	2	0	3	0	1	2	3	1		0.00849177	0.000211385	6419.58	9237.26	3241.23	7697.56	6800.15	4361.42	12061.8	12028.6	4604.96	3539.64	8228.81	7648.84	1387.79	15387	4438.97	6429.93	20818.4	16221.1	4211.17
1496	M142T20	142.1	142.1	142.1	20.4445	20.4409	20.7099	10	1	0	0	0	0	0	1	0	0	0	0	2	0	0	1	2	1	1	1		0.0085182	0.000211968	2130.97	910.156	324.408	1013.76	1254.29	512.198	2222.57	967.039	611.326	1478.02	1352.18	3297.95	297.955	536.201	2406.7	8055.93	4019.86	729.782	3203.61
1497	M57T24	57.1	57.1	57.1	23.8035	23.7958	23.8387	9	1	0	0	0	0	0	0	1	0	0	0	0	0	4	0	0	1	0	2		0.00860082	0.000213787	67001.8	48289.6	39405.2	58028.9	41145	42783.3	40006.3	57818.4	36912.2	18022.6	59008.7	29731.5	20472.5	146818	72215.2	45861.2	43487	32365.5	58728
1498	M156T6	156.2	156.2	156.2	5.9876	5.81128	6.09928	5	0	0	0	0	0	0	0	0	0	0	0	0	2	2	0	0	1	0	0		0.00860217	0.000213817	859.039	69.5013	33.725	170.015	169.649	93.8691	244.244	230.342	143.121	383.382	1650.12	130.821	3499.42	9843.16	125.085	494.827	7983.46	94.3266	19.3153
[truncated: 499 more rows]
[truncated: 90 more columns]

## Sheet: only p<0.01 (1515 features)
featureidx	name	mzmed	mzmin	mzmax	rtmed	rtmin	rtmax	npeaks	Prosopis	Control	Poaceae	Mirabilis	Quercus	Senna	Gutierrezia	Mimosa	Vitis	Argemone	Chilopsis	Datura foliage	Amaranthus	Proboscidea	Baccharis	tassel_3	Helianthus	Datura flower	Agave	CV	pvalue	qvalue	Prosopis.mean	Control.mean	Poaceae.mean	Mirabilis.mean	Quercus.mean	Senna.mean	Gutierrezia.mean	Mimosa.mean	Vitis.mean	Argemone.mean	Chilopsis.mean	Datura foliage.mean	Amaranthus.mean	Proboscidea.mean	Baccharis.mean	tassel_3.mean	Helianthus.mean	Datura flower.mean	Agave.mean
[truncated: 1,515 more rows]
[truncated: 90 more columns]

[truncated: 3 more sheets: <24.5 min RT (1308 features), AHC_HID, AHC1_HID]
