# Supplementary material for: Unique neural coding of crucial versus irrelevant plant odors in a hawkmoth
Source: eLife. 2022 May 27;11:e77429. doi: 10.7554/eLife.77429 (PMC9142141; doi:10.7554/eLife.77429)
Supplement: Figure 2—source data 1. — Gas chromatography-coupled electro-antennographic detection (GC-EAD) results from 80 antennae. [file elife-77429-fig2-data1.xlsx]

## Sheet: EAD-amplitude (µV) 
Headspace	Female status: virgin/mated	Ethyl sorbate (2)	Ethyl sorbate (3)	Propyl sorbate (1)	Geraniol	(Z)-3-Hexenyl acetate	Benzyl alcohol	b-Ocimene	Linalool	(E)-b-Farnesene	Ethyl sorbate (1)	Propyl sorbate (2)	Isoamyl isovalerate	a-Copaene	Ethyl benzoate	Ethyl-2-hexanoate	Methyl sorbate	2-Heptanol	Citral	Methyl salicylate	Butyl sorbate	Propyl tiglate	Unidentified ester	Unidentified ester	Unidentified ester	Methyl benzoate	Ethylhexanol	(Z)-Jasmone	b-Myrcene	a-Farnesene	(E)-Verbenol	Eucalyptol	Acetophenone	Ethyl tiglate	Geranyl acetone	Nerol	DMNT	Decanal	(Z)-3-Hexenyl butyrate	Guaiacol	Germacrene D-4ol	Bicyclogermacrene	Germacrene D	(+)-Limonene	Methyl heptenone	(Z)-3-Hexenyl benzoate	Isogermacrene D	Ethyl hexanoate	3-Methylbutylaldoxime
Agave flower	virgin	0	2620	2160	0	0	260	0	0	0	1240	1260	0	0	1080	860	500	0	0	480	800	620	820	820	780	280	0	0	0	0	0	0	0	580	340	0	0	0	0	0	0	0	0	180	0	0	0	360	0
	virgin	2880	2140	2200	0	0	700	0	0	0	1500	1360	1540	0	1940	1080	1020	0	0	820	1320	860	260	660	840	700	0	0	0	0	0	0	0	600	640	0	0	0	0	0	0	0	0	560	0	0	0	420	0
	virgin	3300	3140	2680	0	0	360	0	0	0	1400	1160	1120	0	1060	1060	1600	0	0	600	880	1100	1020	1420	780	740	0	0	0	0	0	0	0	520	0	0	0	0	0	0	0	0	0	480	0	0	0	620	0
	mated	2100	1020	880	0	0	240	0	0	0	320	80	860	0	0	0	0	0	0	300	0	120	120	0	160	240	0	0	0	0	0	0	0	320	640	0	0	0	0	0	0	0	0	0	0	0	0	0	0
	mated	2960	3120	1840	0	0	900	0	0	0	640	880	1180	0	900	1380	1260	0	0	620	860	980	1020	1000	560	400	0	0	0	0	0	0	0	800	260	0	0	0	0	0	0	0	0	580	0	0	0	540	0
Datura flower	virgin	0	0	0	2060	900	2400	700	380	0	0	0	0	1020	0	0	0	0	960	740	0	0	0	0	0	740	0	0	120	960	0	200	0	0	0	400	0	0	0	0	0	0	0	0	0	0	0	0	0
	virgin	0	0	0	2880	1660	1920	1820	800	0	0	0	0	1400	0	0	0	0	1200	940	0	0	0	0	0	620	0	0	0	0	0	600	0	0	0	540	0	0	0	0	0	0	0	0	0	320	0	0	1100
	virgin	0	0	0	4820	2440	2340	3500	1460	0	0	0	0	2280	0	0	0	0	1160	1560	0	0	0	0	0	1300	0	0	1020	1600	0	880	0	0	0	1240	0	0	0	0	0	0	0	0	0	900	0	0	1720
	virgin	0	0	0	1900	1440	1680	1260	860	0	0	0	0	1140	0	0	0	0	900	900	0	0	0	0	0	780	0	0	400	600	0	600	0	0	0	460	0	0	0	0	0	0	0	0	0	740	0	0	420
	mated	0	0	0	2120	900	2240	760	680	0	0	0	0	900	0	0	0	0	960	1000	0	0	0	0	0	1200	0	0	500	700	0	680	0	0	0	1720	0	0	0	0	0	0	0	0	0	580	0	0	60
	mated	0	0	0	1840	940	1860	1020	740	0	0	0	0	1080	0	0	0	0	840	940	0	0	0	0	0	620	0	0	1100	860	0	540	0	0	0	560	0	0	0	0	0	0	0	0	0	440	0	0	460
	mated	0	0	0	1540	1420	1560	1180	720	0	0	0	0	1000	0	0	0	0	1520	1280	0	0	0	0	0	580	0	0	640	700	0	760	0	0	0	980	0	0	0	0	0	0	0	0	0	0	0	0	0
Mimosa	virgin	0	0	0	0	1680	1300	720	0	0	0	0	0	0	0	0	0	0	0	480	0	0	0	0	0	0	0	0	0	0	0	0	0	0	0	0	0	0	0	1200	0	0	0	0	0	0	0	0	0
	virgin	0	0	0	0	180	640	1660	0	0	0	0	0	0	0	0	0	0	0	680	0	0	0	0	0	0	0	340	0	0	0	0	0	0	0	0	0	0	0	1460	0	0	0	0	0	0	0	0	0
	virgin	0	0	0	0	1460	800	1320	0	0	0	0	0	0	0	0	0	0	0	800	0	0	0	0	0	0	0	800	0	0	0	0	0	0	0	0	0	0	0	500	0	0	0	0	0	0	0	0	0
	mated	0	0	0	0	1440	920	1120	0	0	0	0	0	0	0	0	0	0	0	440	0	0	0	0	0	0	0	780	0	0	0	0	0	0	0	0	0	0	0	460	0	0	0	0	0	0	0	0	0
	mated	0	0	0	0	1520	1360	1160	0	0	0	0	0	0	0	0	0	0	0	0	0	0	0	0	0	0	0	520	0	0	0	0	0	0	0	0	0	0	0	0	0	0	0	0	0	0	0	0	0
	mated	0	0	0	0	1800	980	1060	0	0	0	0	0	0	0	0	0	0	0	340	0	0	0	0	0	0	0	600	0	0	0	0	0	0	0	0	0	0	0	500	0	0	0	0	0	0	0	0	0
Mirabilis	virgin	0	0	0	0	1800	0	1970	0	1440	0	0	0	720	0	0	0	0	0	0	0	0	0	0	0	0	0	0	0	340	0	0	0	0	0	0	0	0	0	0	620	260	400	0	0	0	0	0	0
	virgin	0	0	0	0	1280	0	1160	0	1300	0	0	0	840	0	0	0	0	0	0	0	0	0	0	0	0	0	0	0	460	0	0	0	0	0	0	0	0	0	0	360	280	380	0	0	0	0	0	0
	mated	0	0	0	0	1180	0	1260	0	420	0	0	0	640	0	0	0	0	0	0	0	0	0	0	0	0	0	0	0	400	0	0	0	0	0	0	0	0	0	0	120	280	400	0	0	0	0	0	0
	mated	0	0	0	0	1580	0	2360	0	1280	0	0	0	860	0	0	0	0	0	0	0	0	0	0	0	0	0	0	0	940	0	0	0	0	0	0	0	0	0	0	620	420	340	0	0	0	0	0	0
Datura foliage	virgin	0	0	0	400	1120	400	0	0	0	0	0	0	0	0	0	0	0	0	0	0	0	0	0	0	0	0	380	0	280	0	0	0	0	220	0	0	0	0	0	0	0	0	0	0	0	0	0	0
	virgin	0	0	0	780	1160	320	0	0	0	0	0	0	0	0	0	0	0	0	0	0	0	0	0	0	0	0	190	0	420	0	0	0	0	160	0	0	0	0	0	0	0	0	0	0	0	0	0	0
	virgin	0	0	0	660	1040	300	0	0	0	0	0	0	0	0	0	0	0	0	0	0	0	0	0	0	0	0	0	0	500	0	0	0	0	320	0	0	0	0	0	0	0	0	0	0	0	0	0	0
	virgin	0	0	0	700	500	0	0	0	0	0	0	0	0	0	0	0	0	0	0	0	0	0	0	0	0	0	200	0	0	0	0	0	0	0	0	0	0	0	0	0	0	0	0	0	0	0	0	0
	virgin	0	0	0	0	1040	1100	0	0	0	0	0	0	0	0	0	0	0	0	0	0	0	0	0	0	0	0	780	0	0	0	0	0	0	560	0	0	0	0	0	0	0	0	0	0	0	0	0	0
	mated	0	0	0	340	1180	400	0	0	0	0	0	0	0	0	0	0	0	0	0	0	0	0	0	0	0	0	360	0	220	0	0	0	0	220	0	0	0	0	0	0	0	0	0	0	0	0	0	0
	mated	0	0	0	780	1320	280	0	0	0	0	0	0	0	0	0	0	0	0	0	0	0	0	0	0	0	0	300	0	360	0	0	0	0	0	0	0	0	0	0	0	0	0	0	0	0	0	0	0
Proboscidea	virgin	0	0	0	0	0	0	980	300	0	0	0	0	0	0	0	0	0	0	0	0	0	0	0	0	0	880	0	0	0	0	0	0	0	0	0	0	0	0	0	0	0	0	190	0	0	0	0	0
	virgin	0	0	0	0	0	0	700	280	0	0	0	0	0	0	0	0	0	0	0	0	0	0	0	0	0	0	0	0	0	0	0	0	0	0	0	0	0	0	0	0	0	0	160	0	0	0	0	0
	mated	0	0	0	0	0	0	1080	340	0	0	0	0	0	0	0	0	0	0	0	0	0	0	0	0	0	580	0	0	0	0	0	0	0	0	0	0	0	0	0	0	0	0	200	0	0	0	0	0
	mated	0	0	0	0	0	0	1800	400	0	0	0	0	0	0	0	0	0	0	0	0	0	0	0	0	0	1200	0	0	0	0	0	0	0	0	0	0	0	0	0	0	0	0	320	0	0	0	0	0
Chilopsis	virgin	0	0	0	480	900	840	1260	780	0	0	0	0	0	0	0	0	0	0	420	0	0	0	0	0	0	0	0	0	340	0	0	360	0	0	0	0	300	0	0	0	0	0	0	0	0	0	0	0
	virgin	0	0	0	620	860	560	1420	760	0	0	0	0	0	0	0	0	0	0	460	0	0	0	0	0	0	0	0	0	660	0	0	100	0	0	0	300	600	0	0	0	0	0	0	180	0	0	0	0
	virgin	0	0	0	1120	1640	940	1020	1500	0	0	0	0	0	0	0	0	0	0	0	0	0	0	0	0	0	0	0	0	0	0	0	80	0	0	0	540	0	0	0	0	0	0	0	280	0	0	0	0
	mated	0	0	0	820	1120	680	960	1420	0	0	0	0	0	0	0	0	0	0	540	0	0	0	0	0	0	0	0	0	560	0	0	320	0	0	0	0	740	0	0	0	0	0	0	0	0	0	0	0
	mated	0	0	0	460	1640	1520	2240	1360	0	0	0	0	0	0	0	0	0	0	480	0	0	0	0	0	0	0	0	0	1140	0	0	400	0	0	0	360	0	0	0	0	0	0	0	60	0	0	0	0
	mated	0	0	0	260	1440	980	1140	1220	0	0	0	0	0	0	0	0	0	0	720	0	0	0	0	0	0	0	0	0	380	0	0	520	0	0	0	440	620	0	0	0	0	0	0	180	0	0	0	0
Helianthus	virgin	0	0	0	0	2060	0	600	0	0	0	0	0	0	0	0	0	0	0	0	0	0	0	0	0	0	0	0	760	0	820	0	0	0	500	0	120	0	620	0	0	0	400	0	0	0	280	0	0
	virgin	0	0	0	0	560	0	220	0	0	0	0	0	0	0	0	0	0	0	0	0	0	0	0	0	0	0	0	660	0	0	0	0	0	640	0	0	0	980	0	0	0	560	540	0	0	0	0	0
	mated	0	0	0	0	1800	0	1220	0	0	0	0	0	0	0	0	0	0	0	0	0	0	0	0	0	0	0	0	880	0	780	0	0	0	660	0	160	0	380	0	0	0	1060	720	0	0	580	0	0
	mated	0	0	0	0	1120	0	560	0	0	0	0	0	0	0	0	0	0	0	0	0	0	0	0	0	0	0	0	420	0	500	0	0	0	240	0	400	0	100	0	0	0	220	400	0	0	660	0	0
Vitis	virgin	0	0	0	0	2360	0	560	0	0	0	0	0	0	0	0	0	0	0	1080	0	0	0	0	0	0	480	720	0	540	0	0	0	0	560	0	0	0	400	0	0	240	200	0	0	0	0	0	0
	virgin	0	0	0	0	2260	0	1320	0	0	0	0	0	0	0	0	0	0	0	360	0	0	0	0	0	0	720	900	0	780	0	0	0	0	680	0	720	0	620	0	0	420	120	0	0	0	0	0	0
	virgin	0	0	0	0	1660	0	400	0	0	0	0	0	0	0	0	0	0	0	440	0	0	0	0	0	0	190	540	0	320	0	0	0	0	0	0	360	0	200	0	0	0	620	0	0	0	0	0	0
	mated	0	0	0	0	1580	0	1200	0	0	0	0	0	0	0	0	0	0	0	280	0	0	0	0	0	0	560	360	0	260	0	0	0	0	160	0	580	0	240	0	0	300	380	0	0	0	0	0	0
	mated	0	0	0	0	2100	0	1360	0	0	0	0	0	0	0	0	0	0	0	580	0	0	0	0	0	0	120	760	0	520	0	0	0	0	500	0	600	0	240	0	0	0	0	0	0	0	0	0	0
	mated	0	0	0	0	1940	0	920	0	0	0	0	0	0	0	0	0	0	0	0	0	0	0	0	0	0	160	0	0	740	0	0	0	0	0	0	500	0	580	0	0	0	0	0	0	0	0	0	0
Amaranthus	virgin	0	0	0	0	0	0	0	0	0	0	0	0	0	0	0	0	1120	0	0	0	0	0	0	0	0	0	0	0	0	0	0	0	0	0	0	0	0	0	0	0	0	0	0	0	0	0	0	0
	virgin	0	0	0	0	0	0	0	0	0	0	0	0	0	0	0	0	700	0	0	0	0	0	0	0	0	0	0	0	0	0	0	0	0	0	0	0	0	0	0	0	0	0	0	0	0	0	0	0
	mated	0	0	0	0	0	0	0	0	0	0	0	0	0	0	0	0	980	0	0	0	0	0	0	0	0	0	0	0	0	0	0	0	0	0	0	0	0	0	0	0	0	0	0	0	0	0	0	0
	mated	0	0	0	0	0	0	0	0	0	0	0	0	0	0	0	0	760	0	0	0	0	0	0	0	0	0	0	0	0	0	0	0	0	0	0	0	0	0	0	0	0	0	0	0	0	0	0	0
	mated	0	0	0	0	0	0	0	0	0	0	0	0	0	0	0	0	1400	0	0	0	0	0	0	0	0	0	0	0	0	0	0	0	0	0	0	0	0	0	0	0	0	0	0	0	0	0	0	0
Argemone	no response in 3 moths
Baccharis	virgin	0	0	0	0	0	0	0	0	0	0	0	0	0	0	0	0	0	0	0	0	0	0	0	0	0	0	200	0	0	0	0	460	0	0	0	700	0	0	0	0	600	0	0	0	0	0	0	0
	virgin	0	0	0	0	0	790	0	0	0	0	0	0	0	0	0	0	0	0	0	0	0	0	0	0	0	0	360	0	0	0	0	670	0	570	0	127	0	0	0	0	160	0	0	0	0	0	0	0
	mated	0	0	0	0	0	800	0	0	0	0	0	0	0	0	0	0	0	0	0	0	0	0	0	0	0	0	360	0	0	0	0	280	0	0	0	120	0	0	0	0	420	0	0	0	0	0	0	0
	mated	0	0	0	0	0	600	0	0	0	0	0	0	0	0	0	0	0	0	0	0	0	0	0	0	0	0	200	0	0	0	0	580	0	480	0	0	0	0	0	0	220	0	0	0	0	0	0	0
	mated	0	0	0	0	0	540	0	0	0	0	0	0	0	0	0	0	0	0	0	0	0	0	0	0	0	0	0	0	0	0	0	460	0	160	0	280	0	0	0	0	140	0	0	0	0	0	0	0
Gutierrezia	no response in 3 moths
Poaceae	virgin	0	0	0	0	1320	0	0	0	0	0	0	0	0	0	0	0	0	0	0	0	0	0	0	0	0	0	0	0	0	0	0	0	0	0	0	0	0	0	0	0	0	0	0	0	0	0	0	0
	virgin	0	0	0	0	920	0	0	0	0	0	0	0	0	0	0	0	0	0	0	0	0	0	0	0	0	0	0	0	0	0	0	0	0	0	0	0	0	0	0	0	0	0	0	0	0	0	0	0
	virgin	0	0	0	0	1940	0	0	0	0	0	0	0	0	0	0	0	0	0	540	0	0	0	0	0	0	0	0	0	0	0	0	0	0	0	0	0	0	0	0	0	0	0	0	0	0	0	0	0
	mated	0	0	0	0	1860	0	0	0	0	0	0	0	0	0	0	0	0	0	500	0	0	0	0	0	0	0	0	0	0	0	0	0	0	0	0	0	0	0	0	0	0	0	0	0	0	0	0	0
	mated	0	0	0	0	1460	0	0	0	0	0	0	0	0	0	0	0	0	0	0	0	0	0	0	0	0	0	0	0	0	0	0	0	0	0	0	0	0	0	0	0	0	0	0	0	0	0	0	0
	mated	0	0	0	0	1120	0	0	0	0	0	0	0	0	0	0	0	0	0	760	0	0	0	0	0	0	0	0	0	0	0	0	0	0	0	0	0	0	0	0	0	0	0	0	0	0	0	0	0
Prosopis	virgin	0	0	0	460	1480	320	1400	520	0	0	0	0	0	0	0	0	0	0	380	0	0	0	0	0	0	0	0	0	340	0	0	360	0	520	0	0	500	0	0	0	460	0	0	340	0	0	0	0
	virgin	0	0	0	920	2260	540	1620	940	0	0	0	0	0	0	0	0	0	0	900	0	0	0	0	0	0	0	860	0	780	0	0	680	0	500	0	0	880	0	0	0	480	0	0	700	0	0	0	0
	mated	0	0	0	660	1000	480	580	580	0	0	0	0	0	0	0	0	0	0	0	0	0	0	0	0	0	0	0	0	0	0	0	500	0	460	0	0	400	0	0	0	580	0	0	440	0	0	0	0
	mated	0	0	0	0	1420	540	1600	500	0	0	0	0	0	0	0	0	0	0	500	0	0	0	0	0	0	0	720	0	400	0	0	580	0	560	0	0	620	0	0	0	800	0	0	700	0	0	0	0
	mated	0	0	0	700	1420	480	1380	840	0	0	0	0	0	0	0	0	0	0	340	0	0	0	0	0	0	0	800	0	300	0	0	600	0	320	0	0	180	0	0	0	440	0	0	400	0	0	0	0
Quercus	virgin	0	0	0	840	1920	0	0	0	0	0	0	0	0	0	0	0	0	0	0	0	0	0	0	0	0	0	0	0	0	0	0	0	0	0	0	0	0	0	0	0	0	0	0	0	0	0	0	0
	virgin	0	0	0	240	1780	0	500	0	0	0	0	0	0	0	0	0	0	0	0	0	0	0	0	0	0	0	0	0	0	0	0	0	0	500	0	0	0	0	0	0	0	0	0	0	0	0	0	0
	mated	0	0	0	0	1380	0	340	0	0	0	0	0	0	0	0	0	0	0	160	0	0	0	0	0	0	0	0	0	0	0	0	0	0	300	0	0	0	0	0	0	0	0	0	0	0	0	0	0
	mated	0	0	0	300	860	0	0	0	0	0	0	0	0	0	0	0	0	0	420	0	0	0	0	0	0	0	0	0	0	0	0	0	0	540	0	0	0	0	0	0	0	0	0	0	0	0	0	0
	mated	0	0	0	300	1180	0	260	0	0	0	0	0	0	0	0	0	0	0	440	0	0	0	0	0	0	0	0	0	0	0	0	0	0	780	0	0	0	0	0	0	0	0	0	0	0	0	0	0
Senna	virgin	0	0	0	0	540	0	860	580	0	0	0	0	0	0	0	0	0	0	0	0	0	0	0	0	0	0	0	0	0	0	0	0	0	840	0	0	0	0	0	0	0	0	0	0	0	0	0	0
	virgin	0	0	0	0	900	0	700	580	0	0	0	0	0	0	0	0	0	0	0	0	0	0	0	0	0	720	0	0	0	0	0	0	0	0	0	0	0	0	0	0	0	0	0	0	0	0	0	0
	mated	0	0	0	0	1580	0	420	400	0	0	0	0	0	0	0	0	0	0	0	0	0	0	0	0	0	140	0	0	0	0	0	0	0	280	0	0	0	0	0	0	0	0	0	0	0	0	0	0
	mated	0	0	0	0	1020	0	440	260	0	0	0	0	0	0	0	0	0	0	0	0	0	0	0	0	0	340	0	0	0	0	0	0	0	220	0	0	0	0	0	0	0	0	0	0	0	0	0	0
	mated	0	0	0	0	1300	0	340	360	0	0	0	0	0	0	0	0	0	0	0	0	0	0	0	0	0	0	0	0	0	0	0	0	0	0	0	0	0	0	0	0	0	0	0	0	0	0	0	0
Empty bag	no response in 3 moths
[truncated: 29 more columns]
