# Supplementary material for: Unique neural coding of crucial versus irrelevant plant odors in a hawkmoth
Source: eLife. 2022 May 27;11:e77429. doi: 10.7554/eLife.77429 (PMC9142141; doi:10.7554/eLife.77429)
Supplement: Figure 3—source data 1. [file elife-77429-fig3-data1.xlsx]

## Sheet: virgin n=10
Headspace	VIRGIN	glom #1	glom #2	glom #3	glom #4	glom #5	glom #6	glom #7	glom #8	glom #9	glom #10	glom #11	glom #12	glom #13	glom #14	glom #15	glom #16	glom #17	glom #18	glom #19	glom #20	glom #21
Agave flower	female 1	75.0545	76.0991	91.5749	91.1255	79.0479	83.674	91.485	83.5819	87.1238	82.3963	86.9954	100	86.1722	79.7151	80.2977	62.2699	75.9775	82.4085	79.4607	85.3069	100
	female 2	81.8463	88.5218	86.3375	98.4927	51.447	93.5984	100	100	100	84.6262	67.4965	100	100	100	100	99.867	72.6679	100	100	63.9619	100
	female 3	61.2783	55.1339	59.3519	57.1276	37.3784	48.5906	53.1294	43.5938	38.3375	42.4065	50.155	75.9355	57.6322	28.7471	34.2926	62.8004	40.9446	75.4602	53.4795	75.878	80.3274
	female 4	98.1515	72.224	71.2891	72.0185	72.7644	78.2397	83.9281	83.8829	81.6385	71.0024	71.29	100	74.7751	93.3858	78.9546	78.3305	91.617	87.5709	76.8394	70.8773	100
	female 5	14.2917	27.054	34.7066	32.0603	39.31	46.9927	28.9065	29.9223	30.1274	46.4696	31.3381	100	35.3482	36.4197	30.3462	27.99	36.6565	49.6115	31.0785	57.2281	100
	female 6	39.7579	37.8357	53.4115	55.2561	32.2925	56.9986	50.6131	58.2354	51.6393	40.5381	36.2587	100	45.8052	33.9339	46.6947	33.477	48.2851	42.6621	40.3906	64.4104	65.4835
	female 7	91.6997	89.452	81.3056	75.4837	83.2112	96.7212	82.2374	77.6163	85.495	59.5835	31.3245	84.637	100	80.4562	79.6912	94.6204	89.5479	100	91.1238	45.8678	67.0184
	female 8	46.1341	35.3354	45.6835	49.7572	29.985	53.7501	46.6524	53.7828	52.3992	48.8661	46.3959	65.6238	58.1168	47.6501	50.7873	46.4167	28.4403	63.1958	59.2285	70.8088	62.6962
	female 9	35.3473	70.2014	60.1013	62.5083	70.8077	87.8537	61.2269	87.5605	74.8705	65.204	59.351	100	87.0876	74.6117	79.2253	71.4149	74.96	100	70.4975	100	100
	female 10	81.9524	85.4576	80.2842	83.9411	76.5585	100	78.1522	88.347	93.1186	80.9317	72.1762	100	82.9702	80.6344	81.4675	81.2083	91.5879	86.9009	79.0763	100	100
median Agave flower		68.1664	71.2127	65.6952	67.2634	61.1273	80.9568	69.6895	80.5991	78.2545	62.3937	54.753	100	78.8726	77.1634	79.0899	67.1076	73.8139	84.6547	73.6685	70.843	100
Datura flower	female 1	100	100	100	100	100	100	100	100	100	100	100	76.3649	100	100	100	100	100	100	100	100	90.6467
Datura flower	female 2	100	100	92.2697	100	82.9539	84.6689	98.464	89.6452	82.0836	100	100	64.4091	62.2572	80.711	89.8564	86.0278	88.2166	59.2414	74.7784	23.8834	53.4324
Datura flower	female 3	100	97.4922	95.0698	95.7194	100	100	100	100	100	100	100	100	100	100	98.3005	100	94.2569	100	100	100	100
Datura flower	female 4	100	91.9733	78.8573	92.7458	86.3062	91.6638	91.8663	100	99.5421	100	100	70.8262	100	100	92.3454	100	100	100	100	37.0789	79.0416
Datura flower	female 5	100	100	100	100	100	100	100	100	100	100	100	90.0822	100	100	100	100	100	100	100	100	93.1325
Datura flower	female 6	100	100	100	100	100	100	100	100	100	100	100	75.8261	100	100	100	100	100	100	100	100	100
Datura flower	female 7	100	100	100	100	100	100	100	100	100	100	100	100	93.3692	100	100	100	100	94.7429	100	72.0484	100
Datura flower	female 8	100	100	100	100	100	100	100	100	100	100	100	100	100	100	100	100	100	100	100	100	100
Datura flower	female 9	100	100	100	100	100	100	100	100	100	100	100	88.2289	100	100	100	100	100	90.6318	100	54.8684	81.6328
Datura flower	female 10	100	100	100	100	100	99.7083	100	100	100	100	100	45.0765	100	100	100	100	100	100	100	67.5898	77.2626
median Datura flower		100	100	100	100	100	100	100	100	100	100	100	82.2969	100	100	100	100	100	100	100	86.0242	91.8896
Mimosa	female 1	0	55.264	65.8338	70.4632	66.5571	61.7257	48.9984	53.0443	53.1266	0	0	37.014	53.5107	47.6052	72.5066	55.97	69.9773	35.2141	49.0749	0	0
Mimosa	female 2	0	68.2547	67.7184	74.6355	83.2186	77.2493	55.2347	69.0525	66.8556	0	0	37.9134	60.7266	71.5052	82.9969	83.0899	95.5464	60.9907	69.7019	0	0
Mimosa	female 3	0	73.0286	73.4122	63.8878	95.8585	63.7221	60.4782	50.0713	47.6785	0	0	52.0521	49.5028	37.5318	100	65.2937	100	39.1808	49.7087	0	0
Mimosa	female 4	0	18.7887	26.3028	45.6148	38.8744	53.6137	27.1144	36.6078	42.3354	0	0	20.6691	37.1329	48.7242	53.1674	47.2966	71.3201	33.2179	32.406	0	0
Mimosa	female 5	0	37.6197	42.1152	46.9751	44.4649	52.1131	38.2492	56.3195	56.2852	0	0	49.5628	62.1808	56.7723	63.0134	49.1076	48.873	57.9034	58.8344	0	0
Mimosa	female 6	0	51.7511	59.4672	50.5003	50.1622	46.2	56.9058	46.5836	53.9747	0	0	29.1025	64.5029	48.9998	62.035	49.2518	69.4986	60.1085	49.1499	0	0
Mimosa	female 7	0	33.1993	56.6171	69.3046	44.5578	59.5584	53.4771	59.1497	52.348	0	0	51.3451	96.4341	46.4324	57.5259	61.6648	55.6657	59.5077	71.0785	0	0
Mimosa	female 8	0	20.496	26.5333	28.0609	25.2221	27.7823	28.76	42.4296	29.0233	0	0	59.4621	47.2067	53.7953	60.0533	52.1887	42.0629	39.9296	31.023	0	0
Mimosa	female 9	0	27.1058	22.6246	36.7787	31.4209	43.5233	23.6074	40.5144	42.0537	0	0	16.3907	35.3545	37.6643	42.8496	35.8887	42.8193	30.3567	38.3083	0	0
Mimosa	female 10	0	31.1231	37.6913	60.5891	47.7609	64.8315	12.8346	62.6237	54.507	0	0	8.68328	40.2492	41.2292	63.3988	48.8242	78.8022	18.9164	37.5266	0	0
median Mimosa		0	35.4095	49.3661	55.5447	46.1594	56.586	43.6238	51.5578	52.7373	0	0	37.4637	51.5067	48.1647	62.5242	50.7203	69.738	39.5552	49.1124	0	0
Mirabilis	female 1	38.2281	50.1809	57.0759	63.1864	0	64.0819	0	0	0	0	0	0	0	0	0	0	0	0	0	0	0
Mirabilis	female 2	79.1955	69.9911	71.4807	80.961	0	94.9217	0	0	0	0	0	0	0	0	0	0	0	0	0	0	0
Mirabilis	female 3	76.0544	100	100	100	0	88.6252	0	0	0	0	0	0	0	0	0	0	0	0	0	0	0
Mirabilis	female 4	25.8797	46.5972	35.3865	56.9367	0	51.422	0	0	0	0	0	0	0	0	0	0	0	0	0	0	0
Mirabilis	female 5	18.5753	32.6665	36.4408	41.3013	0	43.552	0	0	0	0	0	0	0	0	0	0	0	0	0	0	0
Mirabilis	female 6	47.6274	50.3	67.7107	64.9592	0	52.0054	0	0	0	0	0	0	0	0	0	0	0	0	0	0	0
Mirabilis	female 7	34.8292	26.9996	37.2357	46.5565	0	42.278	0	0	0	0	0	0	0	0	0	0	0	0	0	0	0
Mirabilis	female 8	12.0004	9.41431	18.1655	15.6927	0	26.3522	0	0	0	0	0	0	0	0	0	0	0	0	0	0	0
Mirabilis	female 9	62.3915	24.8194	23.1692	44.5719	0	52.9841	0	0	0	0	0	0	0	0	0	0	0	0	0	0	0
Mirabilis	female 10	37.6655	44.3178	53.7317	56.5921	0	50.6729	0	0	0	0	0	0	0	0	0	0	0	0	0	0	0
median Mirabilis		37.9468	45.4575	45.4837	56.7644	0	51.7137	0	0	0	0	0	0	0	0	0	0	0	0	0	0	0
Datura foliage	female 1	0	0	0	65.4061	0	0	0	0	0	0	0	0	0	0	0	0	0	0	0	0	0
Datura foliage	female 2	0	0	0	65.4669	0	0	0	0	0	0	0	0	0	0	0	0	0	0	0	0	0
Datura foliage	female 3	0	0	0	45.6276	0	0	0	0	0	0	0	0	0	0	0	0	0	0	0	0	0
Datura foliage	female 4	0	0	0	46.3383	0	0	0	0	0	0	0	0	0	0	0	0	0	0	0	0	0
Datura foliage	female 5	0	0	0	34.1962	0	0	0	0	0	0	0	0	0	0	0	0	0	0	0	0	0
Datura foliage	female 6	0	0	0	55.375	0	0	0	0	0	0	0	0	0	0	0	0	0	0	0	0	0
Datura foliage	female 7	0	0	0	48.584	0	0	0	0	0	0	0	0	0	0	0	0	0	0	0	0	0
Datura foliage	female 8	0	0	0	26.6544	0	0	0	0	0	0	0	0	0	0	0	0	0	0	0	0	0
Datura foliage	female 9	0	0	0	62.5967	0	0	0	0	0	0	0	0	0	0	0	0	0	0	0	0	0
Datura foliage	female 10	0	0	0	63.0468	0	0	0	0	0	0	0	0	0	0	0	0	0	0	0	0	0
median Datura foliage		0	0	0	51.9795	0	0	0	0	0	0	0	0	0	0	0	0	0	0	0	0	0
Proboscidea	female 1	0	0	0	0	0	0	0	0	0	0	0	0	0	0	57.7362	0	0	0	0	0	0
Proboscidea	female 2	0	0	0	0	0	0	0	0	0	0	0	0	0	0	93.8932	0	0	0	0	0	0
Proboscidea	female 3	0	0	0	0	0	0	0	0	0	0	0	0	0	0	75.3909	0	0	0	0	0	0
Proboscidea	female 4	0	0	0	0	0	0	0	0	0	0	0	0	0	0	70.0462	0	0	0	0	0	0
Proboscidea	female 5	0	0	0	0	0	0	0	0	0	0	0	0	0	0	28.6215	0	0	0	0	0	0
Proboscidea	female 6	0	0	0	0	0	0	0	0	0	0	0	0	0	0	34.5167	0	0	0	0	0	0
Proboscidea	female 7	0	0	0	0	0	0	0	0	0	0	0	0	0	0	39.0328	0	0	0	0	0	0
Proboscidea	female 8	0	0	0	0	0	0	0	0	0	0	0	0	0	0	46.0243	0	0	0	0	0	0
Proboscidea	female 9	0	0	0	0	0	0	0	0	0	0	0	0	0	0	38.0422	0	0	0	0	0	0
Proboscidea	female 10	0	0	0	0	0	0	0	0	0	0	0	0	0	0	61.3096	0	0	0	0	0	0
median Proboscidea		0	0	0	0	0	0	0	0	0	0	0	0	0	0	51.8803	0	0	0	0	0	0
Chilopsis	female 1	0	0	31.5566	53.399	40.2494	38.5992	0	31.9519	36.7716	0	0	0	0	0	27.2509	28.842	0	0	0	0	0
Chilopsis	female 2	0	0	68.0303	71.4026	82.204	76.6216	0	69.5347	50.8325	0	0	0	0	0	80.0399	87.2448	0	0	0	0	0
Chilopsis	female 3	0	0	43.9037	56.199	65.6587	61.6001	0	56.3269	55.8512	0	0	0	0	0	61.9684	72.533	0	0	0	0	0
Chilopsis	female 4	0	0	59.5695	74.8278	71.6697	67.4161	0	58.9396	64.8852	0	0	0	0	0	66.6054	53.2104	0	0	0	0	0
Chilopsis	female 5	0	0	32.2356	42.0242	37.9983	32.802	0	36.8939	32.3085	0	0	0	0	0	30.5253	22.5012	0	0	0	0	0
Chilopsis	female 6	0	0	54.226	51.4317	37.9765	47.952	0	42.4165	36.5176	0	0	0	0	0	37.5912	34.456	0	0	0	0	0
Chilopsis	female 7	0	0	38.6453	56.8649	38.7377	57.7792	0	44.2586	40.6101	0	0	0	0	0	41.4332	45.4578	0	0	0	0	0
Chilopsis	female 8	0	0	35.3822	46.5759	30.5128	51.1613	0	46.3442	39.6952	0	0	0	0	0	47.7237	54.6772	0	0	0	0	0
Chilopsis	female 9	0	0	27.4065	34.6617	29.124	39.3734	0	35.6823	42.553	0	0	0	0	0	37.4418	34.0417	0	0	0	0	0
Chilopsis	female 10	0	0	49.4969	58.9655	46.7315	45.111	0	44.5264	30.4665	0	0	0	0	0	48.2276	43.6249	0	0	0	0	0
median Chilopsis		0	0	41.2745	54.799	39.4935	49.5567	0	44.3925	40.1526	0	0	0	0	0	44.5785	44.5414	0	0	0	0	0
Helianthus	female 1	48.5017	58.1642	68.4018	78.9617	68.0079	68.7609	56.5487	0	64.0677	0	0	0	0	0	51.6912	64.0594	56.8373	0	49.1217	0	0
Helianthus	female 2	72.441	87.8005	100	92.2399	94.1415	96.0188	79.6769	0	56.3582	0	0	0	0	0	83.4002	81.7962	75.1653	0	67.2513	0	0
Helianthus	female 3	53.3971	60.4749	61.5605	59.4031	50.1315	56.3607	59.1362	0	43.2951	0	0	0	0	0	31.2939	61.5412	29.4386	0	22.0294	0	0
Helianthus	female 4	75.7904	100	100	100	100	100	100	0	100	0	0	0	0	0	100	83.9575	98.253	0	58.3706	0	0
Helianthus	female 5	21.26	35.918	46.1632	55.8399	56.5304	49.6443	34.9281	0	35.2631	0	0	0	0	0	31.2163	36.5559	34.5046	0	35.5867	0	0
Helianthus	female 6	42.687	38.5834	60.6752	57.1815	65.0649	50.0174	50.172	0	50.4018	0	0	0	0	0	39.7221	27.6084	47.8454	0	32.1878	0	0
Helianthus	female 7	47.2601	35.1351	51.8331	65.0975	37.601	56.3336	46.3966	0	39.5652	0	0	0	0	0	40.7286	49.7623	41.6235	0	49.5523	0	0
Helianthus	female 8	22.3694	30.6783	25.8993	35.1677	30.3853	42.205	27.6961	0	28.5918	0	0	0	0	0	36.5497	35.8294	25.0671	0	41.9646	0	0
Helianthus	female 9	70.3329	45.7598	22.9399	48.9987	41.3827	60.2202	19.9634	0	51.8538	0	0	0	0	0	47.8159	44.0155	41.2493	0	44.5398	0	0
Helianthus	female 10	44.7572	40.624	60.6083	68.2992	66.7241	60.7425	35.9251	0	38.1841	0	0	0	0	0	42.7404	33.0146	48.5222	0	32.5212	0	0
median Helianthus		47.8809	43.1919	60.6417	62.2503	60.7976	58.2905	48.2843	0	46.8484	0	0	0	0	0	41.7345	46.8889	44.7344	0	43.2522	0	0
Vitis	female 1	0	66.8956	70.9809	82.8194	77.4044	69.4317	60.8358	61.7467	64.5764	0	0	0	0	0	67.3602	0	67.898	0	0	0	0
Vitis	female 2	0	78.5396	71.2418	78.9132	100	92.7671	63.7841	63.1448	51.4481	0	0	0	0	0	75.8955	0	96.2423	0	0	0	0
Vitis	female 3	0	34.6945	38.2494	49.4745	51.4857	44.1685	25.1465	32.0442	32.012	0	0	0	0	0	49.0747	0	32.7953	0	0	0	0
Vitis	female 4	0	47.1833	35.9862	60.5773	62.9932	65.4636	45.8812	48.2617	50.3546	0	0	0	0	0	62.4859	0	72.956	0	0	0	0
Vitis	female 5	0	24.1745	46.3968	51.13	43.0358	49.0805	42.9769	35.5483	38.0668	0	0	0	0	0	48.3457	0	44.4127	0	0	0	0
Vitis	female 6	0	54.2646	69.8277	73.4866	83.9957	74.326	66.6505	65.1535	60.9847	0	0	0	0	0	70.1189	0	77.6873	0	0	0	0
Vitis	female 7	0	28.88	31.7363	58.8813	37.3975	53.8713	27.0068	44.0983	37.8736	0	0	0	0	0	36.992	0	34.3127	0	0	0	0
Vitis	female 8	0	68.4112	81.2095	80.0971	92.3476	83.2182	65.5213	63.3512	76.4884	0	0	0	0	0	88.6345	0	83.394	0	0	0	0
Vitis	female 9	0	30.3487	14.6467	27.005	26.569	30.6953	17.009	31.3023	27.8013	0	0	0	0	0	29.8356	0	31.3031	0	0	0	0
Vitis	female 10	0	26.0067	40.7676	37.1839	36.8396	29.0232	29.5398	31.8451	23.6037	0	0	0	0	0	45.5873	0	48.1034	0	0	0	0
median Vitis		0	40.9389	43.5822	59.7293	57.2394	59.6674	44.4291	46.18	44.2107	0	0	0	0	0	55.7803	0	58.0007	0	0	0	0
Amaranthus	female 1	0	0	0	0	0	0	0	0	0	0	0	31.0079	0	42.0167	45.391	18.1133	0	0	0	0	0
Amaranthus	female 2	0	0	0	0	0	0	0	0	0	0	0	55.0214	0	91.3912	80.7971	100	0	0	0	0	0
Amaranthus	female 3	0	0	0	0	0	0	0	0	0	0	0	10.8579	0	13.7344	4.88708	40.596	0	0	0	0	0
Amaranthus	female 4	0	0	0	0	0	0	0	0	0	0	0	26.496	0	55.7727	57.1785	63.7372	0	0	0	0	0
Amaranthus	female 5	0	0	0	0	0	0	0	0	0	0	0	49.9413	0	54.2128	50.3263	41.4811	0	0	0	0	0
Amaranthus	female 6	0	0	0	0	0	0	0	0	0	0	0	51.1201	0	43.3984	36.4838	46.4469	0	0	0	0	0
Amaranthus	female 7	0	0	0	0	0	0	0	0	0	0	0	28.9678	0	36.0675	49.6813	44.9163	0	0	0	0	0
Amaranthus	female 8	0	0	0	0	0	0	0	0	0	0	0	41.6205	0	50.0256	43.3402	47.1698	0	0	0	0	0
Amaranthus	female 9	0	0	0	0	0	0	0	0	0	0	0	38.8709	0	37.3755	54.7291	61.6372	0	0	0	0	0
Amaranthus	female 10	0	0	0	0	0	0	0	0	0	0	0	19.599	0	48.3626	44.7562	41.7087	0	0	0	0	0
median Amaranthus		0	0	0	0	0	0	0	0	0	0	0	34.9394	0	45.8805	47.5361	45.6816	0	0	0	0	0
Argemone	female 1	0	0	0	0	0	0	0	0	0	0	0	0	0	0	0	0	0	0	0	0	0
Argemone	female 2	0	0	0	0	0	0	0	0	0	0	0	0	0	0	0	0	0	0	0	0	0
Argemone	female 3	0	0	0	0	0	0	0	0	0	0	0	0	0	0	0	0	0	0	0	0	0
Argemone	female 4	0	0	0	0	0	0	0	0	0	0	0	0	0	0	0	0	0	0	0	0	0
Argemone	female 5	0	0	0	0	0	0	0	0	0	0	0	0	0	0	0	0	0	0	0	0	0
Argemone	female 6	0	0	0	0	0	0	0	0	0	0	0	0	0	0	0	0	0	0	0	0	0
Argemone	female 7	0	0	0	0	0	0	0	0	0	0	0	0	0	0	0	0	0	0	0	0	0
Argemone	female 8	0	0	0	0	0	0	0	0	0	0	0	0	0	0	0	0	0	0	0	0	0
Argemone	female 9	0	0	0	0	0	0	0	0	0	0	0	0	0	0	0	0	0	0	0	0	0
Argemone	female 10	0	0	0	0	0	0	0	0	0	0	0	0	0	0	0	0	0	0	0	0	0
median Argemone		0	0	0	0	0	0	0	0	0	0	0	0	0	0	0	0	0	0	0	0	0
Baccharis	female 1	0	0	0	0	0	0	0	0	0	0	0	0	0	0	0	52.6934	0	0	0	0	0
Baccharis	female 2	0	0	0	0	0	0	0	0	0	0	0	0	0	0	0	73.7522	0	0	0	0	0
Baccharis	female 3	0	0	0	0	0	0	0	0	0	0	0	0	0	0	0	28.6008	0	0	0	0	0
Baccharis	female 4	0	0	0	0	0	0	0	0	0	0	0	0	0	0	0	53.4439	0	0	0	0	0
Baccharis	female 5	0	0	0	0	0	0	0	0	0	0	0	0	0	0	0	31.9962	0	0	0	0	0
Baccharis	female 6	0	0	0	0	0	0	0	0	0	0	0	0	0	0	0	60.4311	0	0	0	0	0
Baccharis	female 7	0	0	0	0	0	0	0	0	0	0	0	0	0	0	0	54.9574	0	0	0	0	0
Baccharis	female 8	0	0	0	0	0	0	0	0	0	0	0	0	0	0	0	54.3056	0	0	0	0	0
Baccharis	female 9	0	0	0	0	0	0	0	0	0	0	0	0	0	0	0	42.8526	0	0	0	0	0
Baccharis	female 10	0	0	0	0	0	0	0	0	0	0	0	0	0	0	0	43.7836	0	0	0	0	0
median Baccharis		0	0	0	0	0	0	0	0	0	0	0	0	0	0	0	53.0687	0	0	0	0	0
Gutierrezia	female 1	33.6054	36.6791	45.5781	63.1103	47.3052	44.3389	40.5178	44.9688	44.8078	0	0	0	0	0	0	0	0	0	0	0	0
Gutierrezia	female 2	71.3436	86.5272	89.1775	76.0077	56.0085	46.6663	76.3511	59.9523	59.5649	0	0	0	0	0	0	0	0	0	0	0	0
Gutierrezia	female 3	50.3896	42.5786	45.5781	51.186	54.3935	46.6663	41.5864	44.1045	44.0985	0	0	0	0	0	0	0	0	0	0	0	0
Gutierrezia	female 4	20.2193	31.0729	24.1411	45.8072	46.6184	41.642	21.9934	44.1045	27.7824	0	0	0	0	0	0	0	0	0	0	0	0
Gutierrezia	female 5	33.0907	42.5786	42.888	49.801	57.444	47.7353	41.5864	41.7144	45.0123	0	0	0	0	0	0	0	0	0	0	0	0
Gutierrezia	female 6	25.1513	27.8554	39.1516	39.8989	32.3533	21.2183	31.7915	16.816	28.1381	0	0	0	0	0	0	0	0	0	0	0	0
Gutierrezia	female 7	50.3896	41.7224	59.7281	87.8123	57.0237	79.3773	51.2327	44.269	42.3399	0	0	0	0	0	0	0	0	0	0	0	0
Gutierrezia	female 8	52.6548	48.7767	47.7653	51.186	54.3935	52.1356	46.2038	34.5383	47.5625	0	0	0	0	0	0	0	0	0	0	0	0
Gutierrezia	female 9	54.4139	43.8944	25.5625	41.7559	30.1055	42.4559	31.0913	38.3131	33.9825	0	0	0	0	0	0	0	0	0	0	0	0
Gutierrezia	female 10	53.4843	59.8669	61.8068	74.4832	74.2018	83.9403	54.8013	65.316	44.0985	0	0	0	0	0	0	0	0	0	0	0	0
median Gutierrezia		50.3896	42.5786	45.5781	51.186	54.3935	46.6663	41.5864	44.1045	44.0985	0	0	0	0	0	0	0	0	0	0	0	0
Poaceae	female 1	0	0	0	0	0	0	0	0	0	0	0	0	0	0	0	0	0	0	0	0	0
Poaceae	female 2	0	0	0	0	0	0	0	0	0	0	0	0	0	0	0	0	0	0	0	0	0
Poaceae	female 3	0	0	0	0	0	0	0	0	0	0	0	0	0	0	0	0	0	0	0	0	0
Poaceae	female 4	0	0	0	0	0	0	0	0	0	0	0	0	0	0	0	0	0	0	0	0	0
Poaceae	female 5	0	0	0	0	0	0	0	0	0	0	0	0	0	0	0	0	0	0	0	0	0
Poaceae	female 6	0	0	0	0	0	0	0	0	0	0	0	0	0	0	0	0	0	0	0	0	0
Poaceae	female 7	0	0	0	0	0	0	0	0	0	0	0	0	0	0	0	0	0	0	0	0	0
Poaceae	female 8	0	0	0	0	0	0	0	0	0	0	0	0	0	0	0	0	0	0	0	0	0
Poaceae	female 9	0	0	0	0	0	0	0	0	0	0	0	0	0	0	0	0	0	0	0	0	0
Poaceae	female 10	0	0	0	0	0	0	0	0	0	0	0	0	0	0	0	0	0	0	0	0	0
median Poaceae		0	0	0	0	0	0	0	0	0	0	0	0	0	0	0	0	0	0	0	0	0
Prosopis	female 1	0	0	0	0	77.5801	69.2891	0	0	0	0	0	0	55.036	68.6264	69.6985	63.087	72.5049	0	54.7914	0	0
Prosopis	female 2	0	0	0	0	97.8913	100	0	0	0	0	0	0	72.0126	83.8243	90.0804	98.5814	100	0	80.2152	0	0
Prosopis	female 3	0	0	0	0	72.7715	58.3779	0	0	0	0	0	0	75.7537	53.4223	55.5329	83.1937	63.8974	0	57.9392	0	0
Prosopis	female 4	0	0	0	0	62.7499	65.6332	0	0	0	0	0	0	29.4859	53.5921	54.6333	41.8182	74.8449	0	31.9037	0	0
Prosopis	female 5	0	0	0	0	31.1438	33.2335	0	0	0	0	0	0	24.6774	24.5267	30.1415	22.2575	34.2731	0	15.8681	0	0
Prosopis	female 6	0	0	0	0	37.8548	29.7544	0	0	0	0	0	0	14.3024	17.167	22.2629	7.98377	28.6153	0	11.8182	0	0
Prosopis	female 7	0	0	0	0	33.6822	57.3471	0	0	0	0	0	0	81.9466	39.7631	48.3919	47.6722	41.4051	0	45.429	0	0
Prosopis	female 8	0	0	0	0	42.0705	47.2851	0	0	0	0	0	0	48.6831	58.3877	56.1794	63.8491	51.784	0	51.4499	0	0
Prosopis	female 9	0	0	0	0	18.9193	24.2121	0	0	0	0	0	0	33.144	25.7816	32.4181	39.8427	25.684	0	18.3522	0	0
Prosopis	female 10	0	0	0	0	44.8503	66.2714	0	0	0	0	0	0	43.0567	54.4659	68.5371	73.7388	64.8079	0	55.1485	0	0
median Prosopis		0	0	0	0	43.4604	57.8625	0	0	0	0	0	0	45.8699	53.5072	55.0831	55.3796	57.8407	0	48.4395	0	0
Quercus	female 1	0	0	0	0	0	0	0	0	0	0	0	0	0	0	0	0	0	0	0	0	0
Quercus	female 2	0	0	0	0	0	0	0	0	0	0	0	0	0	0	0	0	0	0	0	0	0
Quercus	female 3	0	0	0	0	0	0	0	0	0	0	0	0	0	0	0	0	0	0	0	0	0
Quercus	female 4	0	0	0	0	0	0	0	0	0	0	0	0	0	0	0	0	0	0	0	0	0
Quercus	female 5	0	0	0	0	0	0	0	0	0	0	0	0	0	0	0	0	0	0	0	0	0
Quercus	female 6	0	0	0	0	0	0	0	0	0	0	0	0	0	0	0	0	0	0	0	0	0
Quercus	female 7	0	0	0	0	0	0	0	0	0	0	0	0	0	0	0	0	0	0	0	0	0
Quercus	female 8	0	0	0	0	0	0	0	0	0	0	0	0	0	0	0	0	0	0	0	0	0
Quercus	female 9	0	0	0	0	0	0	0	0	0	0	0	0	0	0	0	0	0	0	0	0	0
Quercus	female 10	0	0	0	0	0	0	0	0	0	0	0	0	0	0	0	0	0	0	0	0	0
median Quercus		0	0	0	0	0	0	0	0	0	0	0	0	0	0	0	0	0	0	0	0	0
Senna	female 1	0	0	0	0	0	0	0	0	0	0	0	0	0	51.4708	61.8053	0	62.8429	0	0	0	0
Senna	female 2	0	0	0	0	0	0	0	0	0	0	0	0	0	56.0179	68.1086	0	76.5029	0	0	0	0
Senna	female 3	0	0	0	0	0	0	0	0	0	0	0	0	0	24.0099	75.2625	0	69.2445	0	0	0	0
Senna	female 4	0	0	0	0	0	0	0	0	0	0	0	0	0	47.548	51.8052	0	62.0112	0	0	0	0
Senna	female 5	0	0	0	0	0	0	0	0	0	0	0	0	0	39.8407	58.3101	0	36.9901	0	0	0	0
Senna	female 6	0	0	0	0	0	0	0	0	0	0	0	0	0	26.0486	47.1144	0	55.9292	0	0	0	0
Senna	female 7	0	0	0	0	0	0	0	0	0	0	0	0	0	29.3054	46.7078	0	38.7944	0	0	0	0
Senna	female 8	0	0	0	0	0	0	0	0	0	0	0	0	0	29.5317	45.7474	0	30.5404	0	0	0	0
Senna	female 9	0	0	0	0	0	0	0	0	0	0	0	0	0	46.6348	49.2374	0	54.8868	0	0	0	0
Senna	female 10	0	0	0	0	0	0	0	0	0	0	0	0	0	24.5762	43.7276	0	46.7034	0	0	0	0
median Senna		0	0	0	0	0	0	0	0	0	0	0	0	0	34.6862	50.5213	0	55.408	0	0	0	0
Empty bag	female 1	0	0	0	0	0	0	0	0	0	0	0	0	0	0	0	0	0	0	0	0	0
Empty bag	female 2	0	0	0	0	0	0	0	0	0	0	0	0	0	0	0	0	0	0	0	0	0
Empty bag	female 3	0	0	0	0	0	0	0	0	0	0	0	0	0	0	0	0	0	0	0	0	0
Empty bag	female 4	0	0	0	0	0	0	0	0	0	0	0	0	0	0	0	0	0	0	0	0	0
Empty bag	female 5	0	0	0	0	0	0	0	0	0	0	0	0	0	0	0	0	0	0	0	0	0
Empty bag	female 6	0	0	0	0	0	0	0	0	0	0	0	0	0	0	0	0	0	0	0	0	0
Empty bag	female 7	0	0	0	0	0	0	0	0	0	0	0	0	0	0	0	0	0	0	0	0	0
Empty bag	female 8	0	0	0	0	0	0	0	0	0	0	0	0	0	0	0	0	0	0	0	0	0
Empty bag	female 9	0	0	0	0	0	0	0	0	0	0	0	0	0	0	0	0	0	0	0	0	0
Empty bag	female 10	0	0	0	0	0	0	0	0	0	0	0	0	0	0	0	0	0	0	0	0	0
median Empty bag		0	0	0	0	0	0	0	0	0	0	0	0	0	0	0	0	0	0	0	0	0

## Sheet: mated n=10
Headspace	MATED	glom #1	glom #2	glom #3	glom #4	glom #5	glom #6	glom #7	glom #8	glom #9	glom #10	glom #11	glom #12	glom #13	glom #14	glom #15	glom #16	glom #17	glom #18	glom #19	glom #20	glom #21
Agave flower	female 1	40.5133	61.2686	60.0503	53.0647	62.7958	81.8004	56.0819	52.8792	47.5058	54.1842	52.4595	91.6623	85.4889	51.5044	68.0193	62.6672	76.9317	93.9325	67.6725	88.7521	75.237
Agave flower	female 2	100	100	100	93.9417	72.4798	93.5962	100	100	100	100	100	100	100	94.484	86.7291	62.7935	49.9124	100	100	100	53.6649
Agave flower	female 3	53.0129	68.9705	77.8574	75.4781	76.4434	100	70.7767	75.2452	69.497	93.4231	71.4781	99.5361	94.1699	96.0857	81.7057	85.6062	94.8825	100	90.109	100	100
Agave flower	female 4	46.1557	53.7881	53.221	56.6764	44.5115	57.0005	49.3368	55.7618	57.8002	55.3891	52.2973	94.7119	55.825	60.6061	49.5675	39.6313	45.2081	57.3948	55.9622	57.8128	64.907
Agave flower	female 5	84.3578	67.0995	68.4964	55.5576	42.841	70.206	57.7589	78.1094	62.0656	81.1491	54.1194	100	100	88.3659	86.7506	71.9006	92.2369	93.1679	72.5226	90.9571	98.0266
Agave flower	female 6	48.5561	67.1176	51.4442	59.166	65.7621	69.0408	52.3284	58.9577	47.7013	62.1375	54.4199	100	69.4192	48.197	49.6687	50.3351	68.4263	57.2304	48.5178	61.3502	77.7967
Agave flower	female 7	56.6181	67.8787	65.4839	61.1036	58.1635	59.5114	63.4143	56.2042	58.3659	69.458	59.14	86.5565	73.978	55.5841	50.9202	51.548	58.7189	63.369	80.7849	55.1712	83.0173
Agave flower	female 8	82.8936	56.6316	71.7374	69.1043	63.3847	78.9306	69.1868	73.9692	70.8296	77.1099	80.2299	100	100	62.2686	64.0063	76.1744	63.995	95.8131	100	95.3978	99.5976
Agave flower	female 9	93.0932	100	100	100	100	100	100	99.4793	100	100	82.3318	100	100	99.5328	100	95.5919	100	99.3755	81.357	100	100
Agave flower	female 10	77.6748	93.1278	79.0388	88.1397	90.99	100	78.3718	78.3778	77.2503	79.5359	72.8248	97.6334	100	73.0118	67.2155	66.4571	99.7665	100	70.594	100	93.1133
median Agave flower		67.1465	67.4982	70.1169	65.1039	64.5734	80.3655	66.3005	74.6072	65.7813	78.3229	65.309	99.7681	97.0849	67.6402	67.6174	64.6253	72.679	94.8728	76.6538	93.1775	88.0653
Datura flower	female 1	100	100	100	100	100	100	100	100	100	100	100	100	100	100	100	100	100	100	100	100	100
Datura flower	female 2	94.8664	80.8979	99.82	96.891	75.9594	77.7234	97.0839	70.8097	86.514	70.7439	83.5002	64.8418	60.8822	97.7701	83.0021	87.5166	78.327	86.6618	53.6103	98.9518	90.0524
Datura flower	female 3	100	100	100	100	100	96.6645	100	100	100	100	100	100	100	100	100	100	100	90.4076	100	65.298	53.63
Datura flower	female 4	100	100	100	100	100	100	100	100	100	100	100	100	100	100	100	100	100	100	100	100	100
Datura flower	female 5	100	100	100	70.7826	57.0061	72.5053	100	100	100	100	100	74.8934	85.7877	100	100	100	99.4798	100	100	100	100
Datura flower	female 6	100	100	100	100	100	100	100	100	100	100	100	93.2025	100	100	100	100	100	100	100	100	100
Datura flower	female 7	100	100	100	100	100	100	100	100	100	100	100	94.7916	100	100	87.3174	76.6167	92.3185	100	100	100	100
Datura flower	female 8	100	100	100	100	100	92.2843	100	100	100	100	100	95.5293	92.2152	100	88.3481	100	92.9063	100	95.5842	100	100
Datura flower	female 9	100	96.2959	90.1634	89.9892	88.1359	87.9384	98.7112	100	90.4402	95.239	100	87.2483	90.1434	100	89.3416	100	78.8202	100	100	83.9584	77.7215
Datura flower	female 10	100	100	100	100	100	92.8818	100	100	100	100	100	94.9069	93.4952	86.5497	79.3086	84.5636	97.7895	98.2956	100	94.1176	100
median Datura flower		100	100	100	100	100	94.7731	100	100	100	100	100	94.8492	96.7476	100	94.6708	100	98.6346	100	100	100	100
Mimosa	female 1	0	0	0	45.0443	0	63.6833	0	43.1744	37.6802	0	0	41.7085	55.5926	4	62.8422	42.4282	58.5947	44.3357	48.6916	0	0
Mimosa	female 2	0	0	0	43.1195	0	54.7844	0	46.9292	33.4789	0	0	40.5214	41.1922	60.6086	61.0027	74.395	53.2394	33.1698	42.6715	0	0
Mimosa	female 3	0	0	0	69.5933	0	76.5822	0	67.632	66.5823	0	0	36.0791	46.6272	57.2489	69.6412	71.062	81.0156	69.6264	61.8367	0	0
Mimosa	female 4	0	0	0	42.5542	0	34.5299	0	33.8497	34.1017	0	0	37.0366	32.2627	38.972	45.231	40.4121	57.4089	21.5494	25.6756	0	0
Mimosa	female 5	0	0	0	34.6422	0	32.0473	0	45.6465	29.0029	0	0	41.6169	40.8452	66.61	70.5576	70.1408	100	58.4161	45.2176	0	0
Mimosa	female 6	0	0	0	42.6305	0	37.4422	0	45.1259	29.1613	0	0	47.281	31.4947	20.7015	40.3364	32.1418	38.8024	27.968	34.1259	0	0
Mimosa	female 7	0	0	0	50.7755	0	81.1794	0	60.2098	46.8805	0	0	52.2542	51.6804	66.787	74.2114	72.0268	83.8448	42.1327	68.9001	0	0
Mimosa	female 8	0	0	0	47.0601	0	27.9797	0	45.9996	35.6881	0	0	37.6911	34.5757	70.1286	75.6507	80.2675	71.6522	28.9058	14.3998	0	0
Mimosa	female 9	0	0	0	66.5432	0	61.6292	0	66.3131	57.0728	0	0	57.4305	59.557	66.9158	64.5496	65.5636	58.3923	47.2641	45.345	0	0
Mimosa	female 10	0	0	0	90.6123	0	62.8041	0	58.6989	47.1512	0	0	100	73.5344	100	100	100	100	74.2011	57.2978	0	0
median Mimosa		0	0	0	46.0522	0	58.2068	0	46.4644	36.6841	0	0	41.6627	43.9097	63.6093	67.0954	70.6014	65.1235	43.2342	45.2813	0	0
Mirabilis	female 1	0	49.9933	54.3105	59.1904	72.2212	71.5369	0	0	0	0	0	72.5007	41.2979	0	64.4722	0	88.6521	0	0	0	0
Mirabilis	female 2	0	72.4349	81.9443	91.0722	90.3049	94.4111	0	0	0	0	0	56.1838	57.2474	0	80.0966	0	94.7549	0	0	0	0
Mirabilis	female 3	0	42.3232	54.2811	59.2996	57.1611	65.2112	0	0	0	0	0	25.7333	24.7597	0	37.8991	0	46.8637	0	0	0	0
Mirabilis	female 4	0	45.7453	41.7886	53.6229	55.2388	58.9119	0	0	0	0	0	55.0312	30.3194	0	46.8655	0	37.9504	0	0	0	0
Mirabilis	female 5	0	85.9069	81.6112	100	100	100	0	0	0	0	0	55.5035	64.7717	0	97.5572	0	83.5934	0	0	0	0
Mirabilis	female 6	0	50.0172	45.4067	48.9363	53.278	63.3706	0	0	0	0	0	61.7951	38.4427	0	44.8879	0	59.1569	0	0	0	0
Mirabilis	female 7	0	67.9754	65.5269	59.9308	70.29	71.5729	0	0	0	0	0	42.7707	38.2857	0	44.9536	0	57.2752	0	0	0	0
Mirabilis	female 8	0	30.9979	30.3803	48.5283	56.1199	44.0406	0	0	0	0	0	44.6423	40.7073	0	31.9317	0	33.2141	0	0	0	0
Mirabilis	female 9	0	40.2612	36.2357	29.8066	14.8975	33.197	0	0	0	0	0	25.2568	31.0106	0	50.6274	0	26.9	0	0	0	0
Mirabilis	female 10	0	45.6223	56.5328	72.0552	65.6748	77.0865	0	0	0	0	0	73.7785	66.5016	0	48.0064	0	68.4173	0	0	0	0
median Mirabilis		0	47.8693	54.2958	59.245	61.4179	68.3741	0	0	0	0	0	55.2673	39.575	0	47.4359	0	58.2161	0	0	0	0
Datura foliage	female 1	0	0	0	37.8039	0	0	0	0	0	0	0	0	0	0	0	0	0	0	0	0	0
Datura foliage	female 2	0	0	0	41.1483	0	0	0	0	0	0	0	0	0	0	0	0	0	0	0	0	0
Datura foliage	female 3	0	0	0	81.3211	0	0	0	0	0	0	0	0	0	0	0	0	0	0	0	0	0
Datura foliage	female 4	0	0	0	49.794	0	0	0	0	0	0	0	0	0	0	0	0	0	0	0	0	0
Datura foliage	female 5	0	0	0	44.6577	0	0	0	0	0	0	0	0	0	0	0	0	0	0	0	0	0
Datura foliage	female 6	0	0	0	28.4042	0	0	0	0	0	0	0	0	0	0	0	0	0	0	0	0	0
Datura foliage	female 7	0	0	0	56.3368	0	0	0	0	0	0	0	0	0	0	0	0	0	0	0	0	0
Datura foliage	female 8	0	0	0	71.3913	0	0	0	0	0	0	0	0	0	0	0	0	0	0	0	0	0
Datura foliage	female 9	0	0	0	39.3748	0	0	0	0	0	0	0	0	0	0	0	0	0	0	0	0	0
Datura foliage	female 10	0	0	0	42.4401	0	0	0	0	0	0	0	0	0	0	0	0	0	0	0	0	0
median Datura foliage		0	0	0	43.5489	0	0	0	0	0	0	0	0	0	0	0	0	0	0	0	0	0
Proboscidea	female 1	0	0	0	0	0	0	0	0	0	0	0	55.9706	0	0	0	0	0	0	0	0	0
Proboscidea	female 2	0	0	0	0	0	0	0	0	0	0	0	19.0836	0	0	0	0	0	0	0	0	0
Proboscidea	female 3	0	0	0	0	0	0	0	0	0	0	0	39.6448	0	0	0	0	0	0	0	0	0
Proboscidea	female 4	0	0	0	0	0	0	0	0	0	0	0	40.7912	0	0	0	0	0	0	0	0	0
Proboscidea	female 5	0	0	0	0	0	0	0	0	0	0	0	60.7654	0	0	0	0	0	0	0	0	0
Proboscidea	female 6	0	0	0	0	0	0	0	0	0	0	0	91.3691	0	0	0	0	0	0	0	0	0
Proboscidea	female 7	0	0	0	0	0	0	0	0	0	0	0	100	0	0	0	0	0	0	0	0	0
Proboscidea	female 8	0	0	0	0	0	0	0	0	0	0	0	35.7946	0	0	0	0	0	0	0	0	0
Proboscidea	female 9	0	0	0	0	0	0	0	0	0	0	0	44.3475	0	0	0	0	0	0	0	0	0
Proboscidea	female 10	0	0	0	0	0	0	0	0	0	0	0	62.9263	0	0	0	0	0	0	0	0	0
median Proboscidea		0	0	0	0	0	0	0	0	0	0	0	50.1591	0	0	0	0	0	0	0	0	0
Chilopsis	female 1	0	0	0	37.2256	0	48.0585	0	29.7125	0	0	0	47.6858	62.6358	45.1724	44.4413	47.4942	54.303	53.9341	40.7537	0	0
Chilopsis	female 2	0	0	0	100	0	100	0	86.7485	0	0	0	35.8485	56.4344	63.6097	100	100	100	37.4141	66.2251	0	0
Chilopsis	female 3	0	0	0	64.031	0	77.3186	0	50.7402	0	0	0	56.2928	52.5575	58.3619	48.8907	61.4132	65.1344	53.322	42.4393	0	0
Chilopsis	female 4	0	0	0	40.8155	0	47.5433	0	42.382	0	0	0	50.4268	44.7938	47.0934	44.0604	36.536	41.9663	47.2087	32.754	0	0
Chilopsis	female 5	0	0	0	24.8144	0	20.1876	0	42.5431	0	0	0	41.3233	30.4581	15.1592	44.9046	47.0263	42.3569	38.3105	35.886	0	0
Chilopsis	female 6	0	0	0	54.5194	0	56.1479	0	44.2878	0	0	0	64.6386	43.0543	39.5796	45.6422	42.7651	54.4623	27.9433	28.6317	0	0
Chilopsis	female 7	0	0	0	82.1002	0	89.912	0	69.0485	0	0	0	66.0193	65.2771	51.3917	69.3414	71.8162	73.0075	42.4476	79.542	0	0
Chilopsis	female 8	0	0	0	63.1044	0	60.2301	0	62.9671	0	0	0	57.182	59.453	63.144	61.3359	64.7732	68.4408	55.3573	54.7467	0	0
Chilopsis	female 9	0	0	0	15.3235	0	30.6023	0	27.5595	0	0	0	49.9135	30.3306	38.7242	27.1183	46.721	15.0927	38.8977	41.0085	0	0
Chilopsis	female 10	0	0	0	67.6432	0	58.9507	0	51.6582	0	0	0	54.7782	53.53	61.1441	50.8449	61.1132	66.3372	65.4058	54.8535	0	0
median Chilopsis		0	0	0	58.8119	0	57.5493	0	47.514	0	0	0	52.6025	53.0438	49.2426	47.2665	54.3037	59.7983	44.8282	41.7239	0	0
Helianthus	female 1	0	46.0459	46.1884	43.5833	47.9249	56.5881	37.3603	26.7129	22.8316	0	0	27.2745	44.3034	43.4834	48.3212	36.1376	56.4265	32.7644	37.7363	0	0
Helianthus	female 2	0	89.4092	99.611	99.8403	92.9465	88.5857	69.5617	77.9173	70.6619	0	0	54.2721	71.6713	81.415	89.9426	96.6945	89.3426	80.0622	65.7434	0	0
Helianthus	female 3	0	63.9439	72.0373	75.1707	65.3727	76.6558	57.0055	47.4878	54.4568	0	0	34.4016	35.7959	46.6376	49.5965	50.1053	68.6553	41.4946	43.9398	0	0
Helianthus	female 4	0	32.3002	32.4582	49.7062	56.3739	57.4518	27.6311	47.1053	38.1653	0	0	47.0674	30.3927	32.8952	45.5218	35.0024	43.1805	32.4486	32.437	0	0
Helianthus	female 5	0	63.7635	65.7147	64.4048	56.8333	73.5078	57.515	79.7365	56.1302	0	0	48.2902	46.4998	50.2126	74.7598	62.4479	79.4018	53.6431	52.6423	0	0
Helianthus	female 6	0	73.1887	60.9713	73.3802	58.8511	69.3028	52.9117	59.6965	42.193	0	0	63.5184	57.1577	50.2061	63.894	63.7666	63.0563	59.0822	46.3879	0	0
Helianthus	female 7	0	53.6862	45.1712	62.752	55.7695	61.0153	38.5099	49.4188	29.1679	0	0	23.1982	34.2786	28.4376	49.3892	49.7095	47.5257	34.0376	51.277	0	0
Helianthus	female 8	0	72.286	68.0408	96.2589	87.9059	87.0457	67.8547	86.6875	73.8532	0	0	54.1102	67.5984	66.1986	69.6555	70.6792	75.1141	69.3101	69.5116	0	0
Helianthus	female 9	0	47.3092	80.431	58.4207	58.4044	72.1969	37.139	61.1377	63.1643	0	0	23.2689	36.5411	41.833	78.7044	50.5494	76.3316	30.0059	28.8203	0	0
Helianthus	female 10	0	66.6869	64.855	71.4612	93.94	75.5231	47.4179	58.0935	40.3151	0	0	58.2426	57.9664	51.457	52.2983	67.4224	75.6626	64.8189	58.6063	0	0
median Helianthus		0	63.8537	65.2849	67.933	58.6278	72.8523	50.1648	58.895	48.3249	0	0	47.6788	45.4016	48.4219	58.0962	56.4987	71.8847	47.5688	48.8325	0	0
Vitis	female 1	0	0	0	42.6816	38.1633	50.1845	0	24.9182	20.3892	0	0	41.7019	28.8682	0	42.53	29.1927	60.2563	0	35.708	0	0
Vitis	female 2	0	0	0	71.6945	78.3235	65.3996	0	40.8317	40.816	0	0	33.3198	37.914	0	62.978	57.2939	68.9112	0	32.8617	0	0
Vitis	female 3	0	0	0	82.7402	85.6754	94.5159	0	79.3563	73.8866	0	0	63.2509	57.9094	0	84.8065	86.2552	80.894	0	68.0762	0	0
Vitis	female 4	0	0	0	53.6653	61.1402	56.4734	0	49.3031	49.2312	0	0	72.9152	41.3699	0	59.3963	50.2722	65.1892	0	40.9842	0	0
Vitis	female 5	0	0	0	57.8118	38.0883	66.1363	0	64.6956	48.774	0	0	61.9305	48.1252	0	75.3485	60.3362	88.9556	0	32.2244	0	0
Vitis	female 6	0	0	0	42.0249	10.5123	30.8012	0	35.2308	25.8873	0	0	54.5764	40.0773	0	42.0438	35.9311	35.8228	0	25.4933	0	0
Vitis	female 7	0	0	0	56.7584	77.5409	81.5064	0	61.1574	33.7946	0	0	34.5734	34.3028	0	73.9074	77.038	72.3427	0	34.0797	0	0
Vitis	female 8	0	0	0	91.7484	88.5165	100	0	75.351	72.6147	0	0	50.3461	82.2162	0	100	80.7751	100	0	83.6034	0	0
Vitis	female 9	0	0	0	4.49042	5.69015	23.6279	0	26.3861	30.4783	0	0	51.5185	40.7247	0	18.3843	44.8992	8.62949	0	34.1316	0	0
Vitis	female 10	0	0	0	63.3479	81.4232	61.1257	0	39.5245	37.7687	0	0	54.8502	38.5825	0	51.9305	51.9315	74.5601	0	42.3798	0	0
median Vitis		0	0	0	57.2851	69.3405	63.2626	0	45.0674	39.2924	0	0	53.0474	40.401	0	61.1871	54.6127	70.6269	0	34.9198	0	0
Amaranthus	female 1	0	0	0	0	0	0	0	0	0	0	0	0	0	44.4261	0	0	0	0	0	0	0
Amaranthus	female 2	0	0	0	0	0	0	0	0	0	0	0	0	0	66.3593	0	0	0	0	0	0	0
Amaranthus	female 3	0	0	0	0	0	0	0	0	0	0	0	0	0	59.4657	0	0	0	0	0	0	0
Amaranthus	female 4	0	0	0	0	0	0	0	0	0	0	0	0	0	32.9682	0	0	0	0	0	0	0
Amaranthus	female 5	0	0	0	0	0	0	0	0	0	0	0	0	0	63.7558	0	0	0	0	0	0	0
Amaranthus	female 6	0	0	0	0	0	0	0	0	0	0	0	0	0	37.2162	0	0	0	0	0	0	0
Amaranthus	female 7	0	0	0	0	0	0	0	0	0	0	0	0	0	40.1055	0	0	0	0	0	0	0
Amaranthus	female 8	0	0	0	0	0	0	0	0	0	0	0	0	0	19.276	0	0	0	0	0	0	0
Amaranthus	female 9	0	0	0	0	0	0	0	0	0	0	0	0	0	57.2072	0	0	0	0	0	0	0
Amaranthus	female 10	0	0	0	0	0	0	0	0	0	0	0	0	0	50.7475	0	0	0	0	0	0	0
median Amaranthus		0	0	0	0	0	0	0	0	0	0	0	0	0	47.5868	0	0	0	0	0	0	0
Argemone	female 1	0	0	0	0	0	0	0	0	0	0	0	0	0	0	0	0	0	0	0	0	0
Argemone	female 2	0	0	0	0	0	0	0	0	0	0	0	0	0	0	0	0	0	0	0	0	0
Argemone	female 3	0	0	0	0	0	0	0	0	0	0	0	0	0	0	0	0	0	0	0	0	0
Argemone	female 4	0	0	0	0	0	0	0	0	0	0	0	0	0	0	0	0	0	0	0	0	0
Argemone	female 5	0	0	0	0	0	0	0	0	0	0	0	0	0	0	0	0	0	0	0	0	0
Argemone	female 6	0	0	0	0	0	0	0	0	0	0	0	0	0	0	0	0	0	0	0	0	0
Argemone	female 7	0	0	0	0	0	0	0	0	0	0	0	0	0	0	0	0	0	0	0	0	0
Argemone	female 8	0	0	0	0	0	0	0	0	0	0	0	0	0	0	0	0	0	0	0	0	0
Argemone	female 9	0	0	0	0	0	0	0	0	0	0	0	0	0	0	0	0	0	0	0	0	0
Argemone	female 10	0	0	0	0	0	0	0	0	0	0	0	0	0	0	0	0	0	0	0	0	0
median Argemone		0	0	0	0	0	0	0	0	0	0	0	0	0	0	0	0	0	0	0	0	0
Baccharis	female 1	0	0	0	0	0	0	0	0	0	0	0	0	0	0	0	0	0	0	0	0	0
Baccharis	female 2	0	0	0	0	0	0	0	0	0	0	0	0	0	0	0	0	0	0	0	0	0
Baccharis	female 3	0	0	0	0	0	0	0	0	0	0	0	0	0	0	0	0	0	0	0	0	0
Baccharis	female 4	0	0	0	0	0	0	0	0	0	0	0	0	0	0	0	0	0	0	0	0	0
Baccharis	female 5	0	0	0	0	0	0	0	0	0	0	0	0	0	0	0	0	0	0	0	0	0
Baccharis	female 6	0	0	0	0	0	0	0	0	0	0	0	0	0	0	0	0	0	0	0	0	0
Baccharis	female 7	0	0	0	0	0	0	0	0	0	0	0	0	0	0	0	0	0	0	0	0	0
Baccharis	female 8	0	0	0	0	0	0	0	0	0	0	0	0	0	0	0	0	0	0	0	0	0
Baccharis	female 9	0	0	0	0	0	0	0	0	0	0	0	0	0	0	0	0	0	0	0	0	0
Baccharis	female 10	0	0	0	0	0	0	0	0	0	0	0	0	0	0	0	0	0	0	0	0	0
median Baccharis		0	0	0	0	0	0	0	0	0	0	0	0	0	0	0	0	0	0	0	0	0
Gutierrezia	female 1	0	0	0	0	0	0	0	0	0	0	0	0	0	0	0	0	0	0	0	0	0
Gutierrezia	female 2	0	0	0	0	0	0	0	0	0	0	0	0	0	0	0	0	0	0	0	0	0
Gutierrezia	female 3	0	0	0	0	0	0	0	0	0	0	0	0	0	0	0	0	0	0	0	0	0
Gutierrezia	female 4	0	0	0	0	0	0	0	0	0	0	0	0	0	0	0	0	0	0	0	0	0
Gutierrezia	female 5	0	0	0	0	0	0	0	0	0	0	0	0	0	0	0	0	0	0	0	0	0
Gutierrezia	female 6	0	0	0	0	0	0	0	0	0	0	0	0	0	0	0	0	0	0	0	0	0
Gutierrezia	female 7	0	0	0	0	0	0	0	0	0	0	0	0	0	0	0	0	0	0	0	0	0
Gutierrezia	female 8	0	0	0	0	0	0	0	0	0	0	0	0	0	0	0	0	0	0	0	0	0
Gutierrezia	female 9	0	0	0	0	0	0	0	0	0	0	0	0	0	0	0	0	0	0	0	0	0
Gutierrezia	female 10	0	0	0	0	0	0	0	0	0	0	0	0	0	0	0	0	0	0	0	0	0
median Gutierrezia		0	0	0	0	0	0	0	0	0	0	0	0	0	0	0	0	0	0	0	0	0
Poaceae	female 1	0	0	0	0	0	0	0	0	0	0	0	0	0	0	0	0	0	0	0	0	0
Poaceae	female 2	0	0	0	0	0	0	0	0	0	0	0	0	0	0	0	0	0	0	0	0	0
Poaceae	female 3	0	0	0	0	0	0	0	0	0	0	0	0	0	0	0	0	0	0	0	0	0
Poaceae	female 4	0	0	0	0	0	0	0	0	0	0	0	0	0	0	0	0	0	0	0	0	0
Poaceae	female 5	0	0	0	0	0	0	0	0	0	0	0	0	0	0	0	0	0	0	0	0	0
Poaceae	female 6	0	0	0	0	0	0	0	0	0	0	0	0	0	0	0	0	0	0	0	0	0
Poaceae	female 7	0	0	0	0	0	0	0	0	0	0	0	0	0	0	0	0	0	0	0	0	0
Poaceae	female 8	0	0	0	0	0	0	0	0	0	0	0	0	0	0	0	0	0	0	0	0	0
Poaceae	female 9	0	0	0	0	0	0	0	0	0	0	0	0	0	0	0	0	0	0	0	0	0
Poaceae	female 10	0	0	0	0	0	0	0	0	0	0	0	0	0	0	0	0	0	0	0	0	0
median Poaceae		0	0	0	0	0	0	0	0	0	0	0	0	0	0	0	0	0	0	0	0	0
Prosopis	female 1	0	0	0	0	0	0	0	0	0	0	0	0	0	0	45.0554	75.4246	0	0	0	0	0
Prosopis	female 2	0	0	0	0	0	0	0	0	0	0	0	0	0	0	63.1652	77.1054	0	0	0	0	0
Prosopis	female 3	0	0	0	0	0	0	0	0	0	0	0	0	0	0	55.8593	66.3644	0	0	0	0	0
Prosopis	female 4	0	0	0	0	0	0	0	0	0	0	0	0	0	0	42.2124	42.534	0	0	0	0	0
Prosopis	female 5	0	0	0	0	0	0	0	0	0	0	0	0	0	0	74.144	62.8789	0	0	0	0	0
Prosopis	female 6	0	0	0	0	0	0	0	0	0	0	0	0	0	0	46.4067	45.5951	0	0	0	0	0
Prosopis	female 7	0	0	0	0	0	0	0	0	0	0	0	0	0	0	52.1147	50.782	0	0	0	0	0
Prosopis	female 8	0	0	0	0	0	0	0	0	0	0	0	0	0	0	26.2374	37.217	0	0	0	0	0
Prosopis	female 9	0	0	0	0	0	0	0	0	0	0	0	0	0	0	33.2088	60.7033	0	0	0	0	0
Prosopis	female 10	0	0	0	0	0	0	0	0	0	0	0	0	0	0	40.7931	49.4677	0	0	0	0	0
median Prosopis		0	0	0	0	0	0	0	0	0	0	0	0	0	0	45.7311	55.7426	0	0	0	0	0
Quercus	female 1	0	0	0	0	0	0	0	0	0	0	0	0	0	0	0	0	0	0	0	0	0
Quercus	female 2	0	0	0	0	0	0	0	0	0	0	0	0	0	0	0	0	0	0	0	0	0
Quercus	female 3	0	0	0	0	0	0	0	0	0	0	0	0	0	0	0	0	0	0	0	0	0
Quercus	female 4	0	0	0	0	0	0	0	0	0	0	0	0	0	0	0	0	0	0	0	0	0
Quercus	female 5	0	0	0	0	0	0	0	0	0	0	0	0	0	0	0	0	0	0	0	0	0
Quercus	female 6	0	0	0	0	0	0	0	0	0	0	0	0	0	0	0	0	0	0	0	0	0
Quercus	female 7	0	0	0	0	0	0	0	0	0	0	0	0	0	0	0	0	0	0	0	0	0
Quercus	female 8	0	0	0	0	0	0	0	0	0	0	0	0	0	0	0	0	0	0	0	0	0
Quercus	female 9	0	0	0	0	0	0	0	0	0	0	0	0	0	0	0	0	0	0	0	0	0
Quercus	female 10	0	0	0	0	0	0	0	0	0	0	0	0	0	0	0	0	0	0	0	0	0
median Quercus		0	0	0	0	0	0	0	0	0	0	0	0	0	0	0	0	0	0	0	0	0
Senna	female 1	0	0	0	0	0	0	0	0	0	0	0	0	0	0	37.4849	0	53.4312	0	0	0	0
Senna	female 2	0	0	0	0	0	0	0	0	0	0	0	0	0	0	96.6717	0	77.8255	0	0	0	0
Senna	female 3	0	0	0	0	0	0	0	0	0	0	0	0	0	0	52.8338	0	63.025	0	0	0	0
Senna	female 4	0	0	0	0	0	0	0	0	0	0	0	0	0	0	30.9221	0	32.4924	0	0	0	0
Senna	female 5	0	0	0	0	0	0	0	0	0	0	0	0	0	0	66.9373	0	92.6971	0	0	0	0
Senna	female 6	0	0	0	0	0	0	0	0	0	0	0	0	0	0	35.8359	0	35.4539	0	0	0	0
Senna	female 7	0	0	0	0	0	0	0	0	0	0	0	0	0	0	100	0	89.8879	0	0	0	0
Senna	female 8	0	0	0	0	0	0	0	0	0	0	0	0	0	0	73.9206	0	79.2736	0	0	0	0
Senna	female 9	0	0	0	0	0	0	0	0	0	0	0	0	0	0	43.0495	0	45.0542	0	0	0	0
Senna	female 10	0	0	0	0	0	0	0	0	0	0	0	0	0	0	40.3892	0	39.534	0	0	0	0
median Senna		0	0	0	0	0	0	0	0	0	0	0	0	0	0	47.9416	0	58.2281	0	0	0	0
Empty bag	female 1	0	0	0	0	0	0	0	0	0	0	0	0	0	0	0	0	0	0	0	0	0
Empty bag	female 2	0	0	0	0	0	0	0	0	0	0	0	0	0	0	0	0	0	0	0	0	0
Empty bag	female 3	0	0	0	0	0	0	0	0	0	0	0	0	0	0	0	0	0	0	0	0	0
Empty bag	female 4	0	0	0	0	0	0	0	0	0	0	0	0	0	0	0	0	0	0	0	0	0
Empty bag	female 5	0	0	0	0	0	0	0	0	0	0	0	0	0	0	0	0	0	0	0	0	0
Empty bag	female 6	0	0	0	0	0	0	0	0	0	0	0	0	0	0	0	0	0	0	0	0	0
Empty bag	female 7	0	0	0	0	0	0	0	0	0	0	0	0	0	0	0	0	0	0	0	0	0
Empty bag	female 8	0	0	0	0	0	0	0	0	0	0	0	0	0	0	0	0	0	0	0	0	0
Empty bag	female 9	0	0	0	0	0	0	0	0	0	0	0	0	0	0	0	0	0	0	0	0	0
Empty bag	female 10	0	0	0	0	0	0	0	0	0	0	0	0	0	0	0	0	0	0	0	0	0
median Empty bag		0	0	0	0	0	0	0	0	0	0	0	0	0	0	0	0	0	0	0	0	0
